# Supplementary material for: The N-degron pathway governs autophagy to promote thermotolerance in Arabidopsis
Source: Research Square preprint supplement (doi:10.21203/rs.3.rs-5415826/v1), 2024-11-25
Supplement: Supplementary file 3 [file 4743bd452ee854889c231105.xlsx]

## Sheet: Supplementary Data 1-1
Col-0_NT_1	Col-0_NT_2	Col-0_NT_3	Col-0_HS_1	Col-0_HS_2	Col-0_HS_3	ATG8a(S)_NT_1	ATG8a(S)_NT_2	ATG8a(S)_HS_1	ATG8a(S)_HS_2	ATG8a(S)_HS_3	Accession	Description	Avg. Mass	PTM	Score (%)	-10lgP	Coverage (%)	Coverage (%) Col-0_NT_1	Coverage (%) Col-0_NT_2	Coverage (%) Col-0_NT_3	Coverage (%) Col-0_HS_1	Coverage (%) Col-0_HS_2	Coverage (%) Col-0_HS_3	Coverage (%) ATG8a(S)_NT_1	Coverage (%) ATG8a(S)_NT_2	Coverage (%) ATG8a(S)_HS_1	Coverage (%) ATG8a(S)_HS_2	Coverage (%) ATG8a(S)_HS_3	#Peptides	#Unique	#Spec Col-0_NT_1	#Spec Col-0_NT_2	#Spec Col-0_NT_3	#Spec Col-0_HS_1	#Spec Col-0_HS_2	#Spec Col-0_HS_3	#Spec ATG8a(S)_NT_1	#Spec ATG8a(S)_NT_2	#Spec ATG8a(S)_HS_1	#Spec ATG8a(S)_HS_2	#Spec ATG8a(S)_HS_3
51221	20560	44963	202560	82246	34933	56456	78516	91987	78659	83584	A0A8F5GFN2	Ribulose bisphosphate carboxylase large chain OS=Arabidopsis thaliana OX=3702 GN=rbcL PE=3 SV=1	52939	Carbamidomethylation; Oxidation (M); Acetylation (N-term)	99.2	410.18	52	51	41	41	52	43	37	52	44	51	44	42	28	15	595	471	534	664	542	400	663	616	785	551	630
51221	20560	44963	202560	82246	34933	56456	78516	91987	78659	83584	A0A1B1W4U8	Ribulose bisphosphate carboxylase large chain OS=Arabidopsis thaliana OX=3702 GN=rbcL PE=3 SV=1	52955	Carbamidomethylation; Oxidation (M); Acetylation (N-term)	99.2	410.18	52	51	41	41	52	43	37	52	44	51	44	42	28	15	595	471	534	664	542	400	663	616	785	551	630
51221	20560	44963	202560	82246	34933	56456	78516	91987	78659	83584	O03042	Ribulose bisphosphate carboxylase large chain OS=Arabidopsis thaliana OX=3702 GN=rbcL PE=1 SV=1	52955	Carbamidomethylation; Oxidation (M); Acetylation (N-term)	99.2	410.18	52	51	41	41	52	43	37	52	44	51	44	42	28	15	595	471	534	664	542	400	663	616	785	551	630
1916.9	494.56	974.88	4565.5	2106.5	692.75	1488.5	2115.1	3331.2	1750.3	2626.5	A0A178VW63	Ribulose bisphosphate carboxylase/oxygenase activase chloroplastic OS=Arabidopsis thaliana OX=3702 GN=At2g39730 PE=3 SV=1	49100	Carbamidomethylation; Oxidation (M); Acetylation (N-term)	99.2	436.08	61	48	38	42	49	41	35	54	50	48	45	45	27	2	556	381	410	587	487	383	572	527	661	599	598
17.071			32.411	0		37.787	46.941	429.62	36.892	0	P10896	Ribulose bisphosphate carboxylase/oxygenase activase chloroplastic OS=Arabidopsis thaliana OX=3702 GN=RCA PE=1 SV=2	51981	Carbamidomethylation; Oxidation (M); Acetylation (N-term)	99.2	433.78	60	47	33	37	49	41	30	54	50	48	45	45	26	1	557	377	408	581	485	380	574	526	659	598	594
17.071			32.411	0		37.787	46.941	429.62	36.892	0	A0A5S9X620	Ribulose bisphosphate carboxylase/oxygenase activase chloroplastic OS=Arabidopsis thaliana OX=3702 GN=AN1_LOCUS10440 PE=3 SV=1	51981	Carbamidomethylation; Oxidation (M); Acetylation (N-term)	99.2	433.78	60	47	33	37	49	41	30	54	50	48	45	45	26	1	557	377	408	581	485	380	574	526	659	598	594
241640	169950	199940	222390	190740	155010	208270	218220	247070	233580	209390	A0A1B1W4V2	ATP synthase subunit beta chloroplastic OS=Arabidopsis thaliana OX=3702 GN=atpB PE=3 SV=1	53934	Carbamidomethylation; Oxidation (M); Acetylation (N-term)	99.2	495.96	66	56	49	50	60	49	46	59	62	66	56	53	30	29	491	308	367	527	379	334	464	496	594	506	520
241640	169950	199940	222390	190740	155010	208270	218220	247070	233580	209390	P19366	ATP synthase subunit beta chloroplastic OS=Arabidopsis thaliana OX=3702 GN=atpB PE=1 SV=2	53934	Carbamidomethylation; Oxidation (M); Acetylation (N-term)	99.2	495.96	66	56	49	50	60	49	46	59	62	66	56	53	30	29	491	308	367	527	379	334	464	496	594	506	520
						0	0	0		19.552	A0A8F5V8I7	Ribulose bisphosphate carboxylase large chain OS=Arabidopsis thaliana OX=3702 GN=rbcL PE=3 SV=1	53845	Carbamidomethylation; Oxidation (M); Acetylation (N-term)	99.2	335.13	31	28	20	20	28	20	20	30	22	31	20	23	15	2	297	246	275	313	278	204	318	319	394	268	321
55286	41341	49230	55066	41583	36634	50870	48686	51643	53260	59323	P23321	Oxygen-evolving enhancer protein 1-1 chloroplastic OS=Arabidopsis thaliana OX=3702 GN=PSBO1 PE=1 SV=2	35142	Carbamidomethylation	99.2	417.61	52	44	43	44	44	44	43	44	44	51	44	44	19	6	213	172	217	228	220	178	240	245	253	260	246
55286	41341	49230	55066	41583	36634	50870	48686	51643	53260	59323	A0A178UTK6	(thale cress) hypothetical protein OS=Arabidopsis thaliana OX=3702 GN=AXX17_At5g66530 PE=3 SV=1	35142	Carbamidomethylation	99.2	417.61	52	44	43	44	44	44	43	44	44	51	44	44	19	6	213	172	217	228	220	178	240	245	253	260	246
10611	11604	23659	25173	14966	6070.4	14403	28287	16668	12087	13482	A0A1I9LQB3	Carbonic anhydrase OS=Arabidopsis thaliana OX=3702 GN=CA1 PE=1 SV=1	28198	Carbamidomethylation; Oxidation (M); Acetylation (N-term)	99.2	367.41	43	39	39	43	43	39	34	43	43	43	39	39	13	8	221	171	205	234	191	140	238	219	246	236	247
18098	12526	18517	17653	12855	7127.3	20900	20946	22303	18283	18763	A0A178UT81	Carbonic anhydrase OS=Arabidopsis thaliana OX=3702 GN=At5g14740 PE=3 SV=1	28344	Carbamidomethylation; Oxidation (M); Acetylation (N-term)	99.2	389.23	43	41	39	41	41	39	35	43	41	43	39	43	14	9	207	165	213	220	189	122	240	213	233	212	242
32862	25840	32812	34642	31877	18344	33863	28940	32067	33804	38595	A0A178WD57	Ribulose bisphosphate carboxylase small subunit chloroplastic OS=Arabidopsis thaliana OX=3702 GN=RBCS PE=3 SV=1	20216	Carbamidomethylation; Acetylation (N-term)	99.1	304.16	51	46	37	31	50	46	41	50	51	51	46	50	11	7	186	156	184	186	171	127	203	202	248	191	189
32862	25840	32812	34642	31877	18344	33863	28940	32067	33804	38595	P10795	Ribulose bisphosphate carboxylase small subunit 1A chloroplastic OS=Arabidopsis thaliana OX=3702 GN=RBCS-1A PE=1 SV=2	20216	Carbamidomethylation; Acetylation (N-term)	99.1	304.16	51	46	37	31	50	46	41	50	51	51	46	50	11	7	186	156	184	186	171	127	203	202	248	191	189
54288	27172	39095	59366	37711	25140	57885	59885	77426	58100	59979	A0A654FRD0	(thale cress) hypothetical protein OS=Arabidopsis thaliana OX=3702 GN=AN1_LOCUS18836 PE=3 SV=1	23841		99.2	380.54	53	52	45	47	53	52	46	52	53	53	52	52	14	12	173	135	178	194	152	115	199	195	215	171	213
54288	27172	39095	59366	37711	25140	57885	59885	77426	58100	59979	A0A178UY46	PSBQA OS=Arabidopsis thaliana OX=3702 GN=At4g21280 PE=3 SV=1	23795		99.2	380.54	53	52	45	47	53	52	46	52	53	53	52	52	14	12	173	135	178	194	152	115	199	195	215	171	213
0	0		217.39	0	0	201.55	127.72	303.48	0	0	P10798	Ribulose bisphosphate carboxylase small subunit 3B chloroplastic OS=Arabidopsis thaliana OX=3702 GN=RBCS-3B PE=1 SV=2	20284	Carbamidomethylation	99.2	282.87	54	51	41	35	54	41	41	54	54	54	51	45	10	1	159	145	168	182	156	111	193	191	220	182	181
0	0		217.39	0	0	201.55	127.72	303.48	0	0	A0A178URY8	Ribulose bisphosphate carboxylase small subunit chloroplastic OS=Arabidopsis thaliana OX=3702 GN=RBCS PE=3 SV=1	20284	Carbamidomethylation	99.2	282.87	54	51	41	35	54	41	41	54	54	54	51	45	10	1	159	145	168	182	156	111	193	191	220	182	181
0	0		217.39	0	0	201.55	127.72	303.48	0	0	A0A5S9Y931	Ribulose bisphosphate carboxylase small subunit chloroplastic OS=Arabidopsis thaliana OX=3702 GN=RBCS PE=3 SV=1	20840	Carbamidomethylation	99.2	282.87	53	49	40	34	53	40	40	53	53	53	49	44	10	1	159	145	168	182	156	111	193	191	220	182	181
0	0		217.39	0	0	201.55	127.72	303.48	0	0	B3H5S2	Ribulose bisphosphate carboxylase small subunit chloroplastic OS=Arabidopsis thaliana OX=3702 GN=RBCS3B PE=1 SV=1	20840	Carbamidomethylation	99.2	282.87	53	49	40	34	53	40	40	53	53	53	49	44	10	1	159	145	168	182	156	111	193	191	220	182	181
0	0		217.39	0	0	201.55	127.72	303.48	0	0	P10797	Ribulose bisphosphate carboxylase small subunit 2B chloroplastic OS=Arabidopsis thaliana OX=3702 GN=RBCS-2B PE=2 SV=2	20350	Carbamidomethylation	99.2	282.87	54	51	41	35	54	41	41	54	54	54	51	45	10	1	159	145	168	182	156	111	193	191	220	182	181
0	0		217.39	0	0	201.55	127.72	303.48	0	0	A0A654G618	Ribulose bisphosphate carboxylase small subunit chloroplastic OS=Arabidopsis thaliana OX=3702 GN=RBCS PE=3 SV=1	20316	Carbamidomethylation	99.2	282.87	54	51	41	35	54	41	41	54	54	54	51	45	10	1	159	145	168	182	156	111	193	191	220	182	181
0	0		217.39	0	0	201.55	127.72	303.48	0	0	A0A178UL15	Ribulose bisphosphate carboxylase small subunit chloroplastic OS=Arabidopsis thaliana OX=3702 GN=RBCS PE=3 SV=1	20343	Carbamidomethylation	99.2	282.87	54	51	41	35	54	41	41	54	54	54	51	45	10	1	159	145	168	182	156	111	193	191	220	182	181
											A0A7G2FEU3	Ribulose bisphosphate carboxylase small subunit chloroplastic OS=Arabidopsis thaliana OX=3702 GN=RBCS PE=3 SV=1	20272	Carbamidomethylation	99.2	280.32	54	41	31	35	44	31	31	44	44	54	41	35	10	0	157	144	168	177	154	110	189	186	215	181	180
69331	41486	54993	69544	50278	35606	65041	65395	84088	63807	73680	F4JBY2	transketolase OS=Arabidopsis thaliana OX=3702 GN=AtTKL1 PE=1 SV=1	79839	Carbamidomethylation; Oxidation (M)	99.2	416.13	38	33	28	31	32	29	26	32	35	37	32	31	24	18	155	131	153	172	157	136	178	172	245	165	184
69331	41486	54993	69544	50278	35606	65041	65395	84088	63807	73680	A0A178VEI0	transketolase OS=Arabidopsis thaliana OX=3702 GN=AXX17_At3g55130 PE=3 SV=1	79968	Carbamidomethylation; Oxidation (M)	99.2	416.13	38	33	28	30	32	29	26	32	35	37	32	31	24	18	155	131	153	172	157	136	178	172	245	165	184
69331	41486	54993	69544	50278	35606	65041	65395	84088	63807	73680	Q8RWV0	Transketolase-1 chloroplastic OS=Arabidopsis thaliana OX=3702 GN=TKL-1 PE=1 SV=1	79968	Carbamidomethylation; Oxidation (M)	99.2	416.13	38	33	28	30	32	29	26	32	35	37	32	31	24	18	155	131	153	172	157	136	178	172	245	165	184
25346	19500	21390	23337	21512	16530	22818	22011	25953	24040	29106	A0A178VBH5	PSBO2 OS=Arabidopsis thaliana OX=3702 GN=AXX17_At3g45080 PE=3 SV=1	35045	Carbamidomethylation	99.2	383.06	51	43	42	43	43	43	42	43	43	50	43	43	18	5	162	134	156	173	165	149	166	169	192	182	186
25346	19500	21390	23337	21512	16530	22818	22011	25953	24040	29106	A0A5S9XJN7	Oxygen-evolving enhancer protein 1 chloroplastic OS=Arabidopsis thaliana OX=3702 GN=C24_LOCUS15324 PE=3 SV=1	34981	Carbamidomethylation	99.2	383.06	51	43	42	43	43	43	42	43	43	51	43	43	18	5	162	134	156	173	165	149	166	169	192	182	186
25346	19500	21390	23337	21512	16530	22818	22011	25953	24040	29106	Q9S841	Oxygen-evolving enhancer protein 1-2 chloroplastic OS=Arabidopsis thaliana OX=3702 GN=PSBO2 PE=1 SV=1	35019	Carbamidomethylation	99.2	383.06	51	43	42	43	43	43	42	43	43	50	43	43	18	5	162	134	156	173	165	149	166	169	192	182	186
159510	105420	138470	157880	126110	87477	152780	159100	178900	161510	173010	A0A1B1W4S8	ATP synthase subunit alpha chloroplastic OS=Arabidopsis thaliana OX=3702 GN=atpA PE=3 SV=1	55328	Oxidation (M)	99.2	362.23	37	33	27	28	35	36	31	36	36	36	36	30	18	15	166	134	165	165	151	139	185	172	193	190	170
159510	105420	138470	157880	126110	87477	152780	159100	178900	161510	173010	P56757	ATP synthase subunit alpha chloroplastic OS=Arabidopsis thaliana OX=3702 GN=atpA PE=1 SV=1	55328	Oxidation (M)	99.2	362.23	37	33	27	28	35	36	31	36	36	36	36	30	18	15	166	134	165	165	151	139	185	172	193	190	170
											P10796	Ribulose bisphosphate carboxylase small subunit 1B chloroplastic OS=Arabidopsis thaliana OX=3702 GN=RBCS-1B PE=1 SV=1	20286	Carbamidomethylation	99.2	278.16	54	31	31	35	35	31	31	35	35	54	31	35	10	0	153	144	168	172	154	110	182	176	206	179	180
											A0A5S9YBC0	Ribulose bisphosphate carboxylase small subunit chloroplastic OS=Arabidopsis thaliana OX=3702 GN=RBCS PE=3 SV=1	20286	Carbamidomethylation	99.2	278.16	54	31	31	35	35	31	31	35	35	54	31	35	10	0	153	144	168	172	154	110	182	176	206	179	180
							21.746				A0A178UQA8	Ribulose bisphosphate carboxylase small subunit chloroplastic OS=Arabidopsis thaliana OX=3702 GN=RBCS PE=3 SV=1	21077	Carbamidomethylation; Acetylation (N-term)	99.2	277.97	56	27	26	30	30	27	30	30	37	48	27	30	10	1	152	141	165	169	151	110	179	176	205	178	178
49997	39779	45218	45409	41451	37389	47052	44708	56837	49235	51347	A0A178V5M8	Phosphoglycerate kinase OS=Arabidopsis thaliana OX=3702 GN=AXX17_At3g12840 PE=3 SV=1	50112	Oxidation (M)	99.2	375.18	43	34	30	31	35	31	27	35	38	41	38	31	20	13	109	95	99	188	134	114	141	187	298	229	164
49997	39779	45218	45409	41451	37389	47052	44708	56837	49235	51347	Q9LD57	Phosphoglycerate kinase 1 chloroplastic OS=Arabidopsis thaliana OX=3702 GN=PGK1 PE=1 SV=1	50112	Oxidation (M)	99.2	375.18	43	34	30	31	35	31	27	35	38	41	38	31	20	13	109	95	99	188	134	114	141	187	298	229	164
57824	36308	45007	57645	41033	31891	53165	55551	65225	56286	54480	A0A178WKB4	Glyceraldehyde-3-phosphate dehydrogenase OS=Arabidopsis thaliana OX=3702 GN=AXX17_At1g39030 PE=3 SV=1	42795	Carbamidomethylation; Oxidation (M)	99.2	371.53	54	45	38	42	52	42	35	46	46	52	42	42	24	18	163	121	138	174	143	120	159	166	202	154	184
57824	36308	45007	57645	41033	31891	53165	55551	65225	56286	54480	A0A7G2DYG1	Glyceraldehyde-3-phosphate dehydrogenase OS=Arabidopsis thaliana OX=3702 GN=AT9943_LOCUS3096 PE=3 SV=1	46562	Carbamidomethylation; Oxidation (M)	99.2	371.53	49	41	35	38	48	38	32	42	42	48	38	38	24	18	163	121	138	174	143	120	159	166	202	154	184
57824	36308	45007	57645	41033	31891	53165	55551	65225	56286	54480	A0A5S9WM95	Glyceraldehyde-3-phosphate dehydrogenase OS=Arabidopsis thaliana OX=3702 GN=AN1_LOCUS3676 PE=3 SV=1	47660	Carbamidomethylation; Oxidation (M)	99.2	371.53	48	40	34	37	47	38	32	41	41	47	38	38	24	18	163	121	138	174	143	120	159	166	202	154	184
57824	36308	45007	57645	41033	31891	53165	55551	65225	56286	54480	P25857	Glyceraldehyde-3-phosphate dehydrogenase GAPB chloroplastic OS=Arabidopsis thaliana OX=3702 GN=GAPB PE=1 SV=2	47660	Carbamidomethylation; Oxidation (M)	99.2	371.53	48	40	34	37	47	38	32	41	41	47	38	38	24	18	163	121	138	174	143	120	159	166	202	154	184
25242	18296	25432	26082	20505	12487	25747	26344	29801	25799	29761	A0A178UW98	Fructose-bisphosphate aldolase OS=Arabidopsis thaliana OX=3702 GN=AXX17_At4g44320 PE=3 SV=1	42988	Carbamidomethylation; Oxidation (M)	99.2	381.64	45	35	34	32	39	30	34	32	37	43	32	35	19	9	145	146	132	161	147	134	153	152	160	166	170
25242	18296	25432	26082	20505	12487	25747	26344	29801	25799	29761	Q944G9	Fructose-bisphosphate aldolase 2 chloroplastic OS=Arabidopsis thaliana OX=3702 GN=FBA2 PE=1 SV=2	42988	Carbamidomethylation; Oxidation (M)	99.2	381.64	45	35	34	32	39	30	34	32	37	43	32	35	19	9	145	146	132	161	147	134	153	152	160	166	170
35680	16293	27321	42178	24634	12439	37712	43743	43717	36178	42928	Q41932	Oxygen-evolving enhancer protein 3-2 chloroplastic OS=Arabidopsis thaliana OX=3702 GN=PSBQ2 PE=1 SV=2	24643		99.2	391.95	54	54	49	49	54	51	49	54	54	54	50	50	15	13	148	95	120	176	134	84	151	178	173	146	160
35680	16293	27321	42178	24634	12439	37712	43743	43717	36178	42928	A0A178UX57	PSII-Q OS=Arabidopsis thaliana OX=3702 GN=AXX17_At4g04980 PE=3 SV=1	24643		99.2	391.95	54	54	49	49	54	51	49	54	54	54	50	50	15	13	148	95	120	176	134	84	151	178	173	146	160
35680	16293	27321	42178	24634	12439	37712	43743	43717	36178	42928	A0A7G2F1A7	(thale cress) hypothetical protein OS=Arabidopsis thaliana OX=3702 GN=AT9943_LOCUS14792 PE=3 SV=1	23954		99.2	391.95	56	56	51	51	56	52	51	56	56	56	52	52	15	13	148	95	120	176	134	84	151	178	173	146	160
25567	19116	25004	23324	20036	14310	24137	27124	26298	26160	27891	Q9SJU4	Fructose-bisphosphate aldolase 1 chloroplastic OS=Arabidopsis thaliana OX=3702 GN=FBA1 PE=1 SV=2	42931	Carbamidomethylation; Oxidation (M)	99.2	365.87	41	40	38	38	41	36	38	40	41	38	41	41	18	7	133	133	137	139	135	123	146	151	144	156	149
25567	19116	25004	23324	20036	14310	24137	27124	26298	26160	27891	A0A178VN79	Fructose-bisphosphate aldolase OS=Arabidopsis thaliana OX=3702 GN=AXX17_At2g16800 PE=3 SV=1	42931	Carbamidomethylation; Oxidation (M)	99.2	365.87	41	40	38	38	41	36	38	40	41	38	41	41	18	7	133	133	137	139	135	123	146	151	144	156	149
72002	48693	70232	52881	57518	43720	59586	77211	72411	62964	72998	A0A8F5GFR7	Photosystem II CP43 reaction center protein OS=Arabidopsis thaliana OX=3702 GN=psbC PE=3 SV=1	50303	Oxidation (M)	99.2	359.8	29	22	15	19	22	22	17	29	21	28	20	22	13	13	132	106	144	125	122	104	166	147	160	146	140
72002	48693	70232	52881	57518	43720	59586	77211	72411	62964	72998	A0A1B1W4T4	Photosystem II CP43 reaction center protein OS=Arabidopsis thaliana OX=3702 GN=psbC PE=3 SV=1	51868	Oxidation (M)	99.2	359.8	29	21	15	18	22	21	16	28	20	27	20	22	13	13	132	106	144	125	122	104	166	147	160	146	140
72002	48693	70232	52881	57518	43720	59586	77211	72411	62964	72998	A0A8F5P3B9	Photosystem II CP43 reaction center protein OS=Arabidopsis thaliana OX=3702 GN=psbC PE=3 SV=1	52012	Oxidation (M)	99.2	359.8	29	21	15	18	22	21	16	28	20	27	20	22	13	13	132	106	144	125	122	104	166	147	160	146	140
72002	48693	70232	52881	57518	43720	59586	77211	72411	62964	72998	P56778	Photosystem II CP43 reaction center protein OS=Arabidopsis thaliana OX=3702 GN=psbC PE=1 SV=3	51868	Oxidation (M)	99.2	359.8	29	21	15	18	22	21	16	28	20	27	20	22	13	13	132	106	144	125	122	104	166	147	160	146	140
43863	29598	35634	39982	33368	23950	66255	41806	51262	45614	46110	A0A7G2F4Y1	(thale cress) hypothetical protein OS=Arabidopsis thaliana OX=3702 GN=AT9943_LOCUS18280 PE=3 SV=1	175794	Carbamidomethylation; Oxidation (M)	99.2	439.62	28	23	19	19	23	22	17	23	25	27	23	22	42	42	138	109	129	131	115	110	136	141	162	134	152
43863	29598	35634	39982	33368	23950	66255	41806	51262	45614	46110	Q9ZNZ7	Ferredoxin-dependent glutamate synthase 1 chloroplastic/mitochondrial OS=Arabidopsis thaliana OX=3702 GN=GLU1 PE=1 SV=3	176751	Carbamidomethylation; Oxidation (M)	99.2	439.62	28	23	19	19	23	22	17	23	24	27	23	22	42	42	138	109	129	131	115	110	136	141	162	134	152
43863	29598	35634	39982	33368	23950	66255	41806	51262	45614	46110	A0A5S9Y233	Glutamine amidotransferase type-2 domain-containing protein OS=Arabidopsis thaliana OX=3702 GN=C24_LOCUS21114 PE=3 SV=1	176751	Carbamidomethylation; Oxidation (M)	99.2	439.62	28	23	19	19	23	22	17	23	24	27	23	22	42	42	138	109	129	131	115	110	136	141	162	134	152
43863	29598	35634	39982	33368	23950	66255	41806	51262	45614	46110	A0A178UNU3	GLUS OS=Arabidopsis thaliana OX=3702 GN=AXX17_At5g03510 PE=3 SV=1	176751	Carbamidomethylation; Oxidation (M)	99.2	439.62	28	23	19	19	23	22	17	23	24	27	23	22	42	42	138	109	129	131	115	110	136	141	162	134	152
3805.7	2824.8	2625.9	2985.6	2586.3	2799.9	2793.6	3000.4	3224.5	3417.3	3478.8	A0A178UV45	Photosystem I reaction center subunit II chloroplastic OS=Arabidopsis thaliana OX=3702 GN=AXX17_At4g03480 PE=3 SV=1	22598	Carbamidomethylation; Oxidation (M)	99.2	349.48	61	61	61	61	61	61	61	61	61	61	61	61	13	2	135	110	109	130	107	106	124	127	132	124	142
3805.7	2824.8	2625.9	2985.6	2586.3	2799.9	2793.6	3000.4	3224.5	3417.3	3478.8	Q9S7H1	Photosystem I reaction center subunit II-1 chloroplastic OS=Arabidopsis thaliana OX=3702 GN=psaD1 PE=1 SV=1	22598	Carbamidomethylation; Oxidation (M)	99.2	349.48	61	61	61	61	61	61	61	61	61	61	61	61	13	2	135	110	109	130	107	106	124	127	132	124	142
35255	21200	27225	39576	21391	14695	32435	35940	47863	38776	35529	Q9XF90	Chlorophyll a-b binding protein chloroplastic OS=Arabidopsis thaliana OX=3702 GN=Lhcb6 PE=2 SV=1	27522		99.2	301.86	33	29	29	31	33	24	21	33	31	23	24	29	11	11	136	99	110	134	98	71	142	144	147	123	137
35255	21200	27225	39576	21391	14695	32435	35940	47863	38776	35529	Q9LMQ2	Chlorophyll a-b binding protein chloroplastic OS=Arabidopsis thaliana OX=3702 GN=CHLOROPHYLL PROTEIN 24 PE=1 SV=1	27522		99.2	301.86	33	29	29	31	33	24	21	33	31	23	24	29	11	11	136	99	110	134	98	71	142	144	147	123	137
35255	21200	27225	39576	21391	14695	32435	35940	47863	38776	35529	A0A654EA44	Chlorophyll a-b binding protein chloroplastic OS=Arabidopsis thaliana OX=3702 GN=At1g15820 PE=3 SV=1	27522		99.2	301.86	33	29	29	31	33	24	21	33	31	23	24	29	11	11	136	99	110	134	98	71	142	144	147	123	137
35255	21200	27225	39576	21391	14695	32435	35940	47863	38776	35529	A0A178WK60	Chlorophyll a-b binding protein chloroplastic OS=Arabidopsis thaliana OX=3702 GN=AXX17_At1g16590 PE=3 SV=1	27336		99.2	301.86	34	29	29	32	33	24	21	33	31	23	24	30	11	11	136	99	110	134	98	71	142	144	147	123	137
35255	21200	27225	39576	21391	14695	32435	35940	47863	38776	35529	A0A5S9ULM2	Chlorophyll a-b binding protein chloroplastic OS=Arabidopsis thaliana OX=3702 GN=C24_LOCUS1630 PE=3 SV=1	27538		99.2	301.86	33	29	29	31	33	24	21	33	31	23	24	29	11	11	136	99	110	134	98	71	142	144	147	123	137
49462	29602	41571	52050	35473	23217	45679	46021	65456	52194	54547	A0A7G2EKV9	(S)-2-hydroxy-acid oxidase OS=Arabidopsis thaliana OX=3702 GN=AT9943_LOCUS11023 PE=3 SV=1	81801	Oxidation (M); Acetylation (N-term)	99.2	350.92	28	26	20	23	25	22	21	25	25	27	27	22	21	21	118	87	121	136	120	93	130	124	149	123	135
49462	29602	41571	52050	35473	23217	45679	46021	65456	52194	54547	A0A5S9XDH6	(S)-2-hydroxy-acid oxidase OS=Arabidopsis thaliana OX=3702 GN=C24_LOCUS12641 PE=3 SV=1	82988	Oxidation (M); Acetylation (N-term)	99.2	350.92	28	26	20	23	25	22	21	25	25	27	26	22	21	21	118	87	121	136	120	93	130	124	149	123	135
432.58	292.77	0	219.61	0	0	0	254.31	0	0	408.37	A0A7G2DN75	Pre-mRNA-splicing factor 18 OS=Arabidopsis thaliana OX=3702 GN=AT9943_LOCUS193 PE=3 SV=1	71239	Carbamidomethylation; Oxidation (M)	99.2	312.11	19	19	19	19	19	19	19	19	19	19	19	19	13	2	130	110	106	125	104	102	119	125	129	121	141
432.58	292.77	0	219.61	0	0	0	254.31	0	0	408.37	Q9SA56	Photosystem I reaction center subunit II-2 chloroplastic OS=Arabidopsis thaliana OX=3702 GN=PSAD2 PE=1 SV=1	22307	Carbamidomethylation; Oxidation (M)	99.2	312.11	60	60	59	60	60	60	60	59	59	59	60	60	13	2	130	110	106	125	104	102	119	125	129	121	141
432.58	292.77	0	219.61	0	0	0	254.31	0	0	408.37	A0A178W876	Photosystem I reaction center subunit II chloroplastic OS=Arabidopsis thaliana OX=3702 GN=AXX17_At1g02370 PE=3 SV=1	22307	Carbamidomethylation; Oxidation (M)	99.2	312.11	60	60	59	60	60	60	60	59	59	59	60	60	13	2	130	110	106	125	104	102	119	125	129	121	141
53290	32877	57290	68082	50324	28348	66546	75465	76741	63213	73463	A0A8F5V7B2	Photosystem II D2 protein OS=Arabidopsis thaliana OX=3702 GN=psbD PE=3 SV=1	39535	Oxidation (M)	99	228.56	14	14	14	14	14	14	14	14	14	14	14	14	4	4	123	102	115	114	110	96	128	124	117	128	113
53290	32877	57290	68082	50324	28348	66546	75465	76741	63213	73463	A0A8F5P3A0	Photosystem II D2 protein OS=Arabidopsis thaliana OX=3702 GN=psbD PE=3 SV=1	39549	Oxidation (M)	99	228.56	14	14	14	14	14	14	14	14	14	14	14	14	4	4	123	102	115	114	110	96	128	124	117	128	113
53290	32877	57290	68082	50324	28348	66546	75465	76741	63213	73463	A0A1B1W4U0	Photosystem II D2 protein OS=Arabidopsis thaliana OX=3702 GN=psbD PE=3 SV=1	39548	Oxidation (M)	98.9	228.56	14	14	14	14	14	14	14	14	14	14	14	14	4	4	123	102	115	114	110	96	128	124	117	128	113
53290	32877	57290	68082	50324	28348	66546	75465	76741	63213	73463	P56761	Photosystem II D2 protein OS=Arabidopsis thaliana OX=3702 GN=psbD PE=1 SV=3	39548	Oxidation (M)	98.9	228.56	14	14	14	14	14	14	14	14	14	14	14	14	4	4	123	102	115	114	110	96	128	124	117	128	113
53290	32877	57290	68082	50324	28348	66546	75465	76741	63213	73463	A0A7G2FQN9	Photosystem II D2 protein OS=Arabidopsis thaliana OX=3702 GN=psbD PE=3 SV=1	40289	Oxidation (M)	98.9	228.56	14	14	14	14	14	14	14	14	14	14	14	14	4	4	123	102	115	114	110	96	128	124	117	128	113
53290	32877	57290	68082	50324	28348	66546	75465	76741	63213	73463	Q8HT12	Photosystem II D2 protein (Fragment) OS=Arabidopsis thaliana OX=3702 GN=psbD PE=3 SV=1	35243	Oxidation (M)	98.8	228.56	16	16	16	16	16	16	16	16	16	16	16	16	4	4	123	102	115	114	110	96	128	124	117	128	113
17283	8906.7	13570	15602	12397	8378.5	14867	16797	19163	14744	18063	A0A7G2ET00	Glyceraldehyde-3-phosphate dehydrogenase OS=Arabidopsis thaliana OX=3702 GN=AT9943_LOCUS12130 PE=3 SV=1	41731	Carbamidomethylation; Oxidation (M)	99.2	315.69	41	33	32	33	35	33	33	33	33	37	33	33	17	5	115	90	106	125	99	78	123	126	149	112	136
17283	8906.7	13570	15602	12397	8378.5	14867	16797	19163	14744	18063	A0A178VLF6	Glyceraldehyde-3-phosphate dehydrogenase OS=Arabidopsis thaliana OX=3702 GN=AXX17_At3g28980 PE=3 SV=1	42490	Carbamidomethylation; Oxidation (M)	99.2	315.69	40	33	32	32	34	33	32	32	32	36	33	33	17	5	115	90	106	125	99	78	123	126	149	112	136
17283	8906.7	13570	15602	12397	8378.5	14867	16797	19163	14744	18063	P25856	Glyceraldehyde-3-phosphate dehydrogenase GAPA1 chloroplastic OS=Arabidopsis thaliana OX=3702 GN=GAPA1 PE=1 SV=3	42490	Carbamidomethylation; Oxidation (M)	99.2	315.69	40	33	32	32	34	33	32	32	32	36	33	33	17	5	115	90	106	125	99	78	123	126	149	112	136
36633	26872	31786	36705	30248	22006	36106	34989	40410	37723	48526	A0A178VZW6	SLP OS=Arabidopsis thaliana OX=3702 GN=AXX17_At2g23960 PE=3 SV=1	62072	Oxidation (M)	99.2	359.49	31	26	26	25	27	26	26	26	25	29	26	29	18	16	86	99	78	105	103	102	106	92	122	117	107
36633	26872	31786	36705	30248	22006	36106	34989	40410	37723	48526	A0A7G2EDL5	(thale cress) hypothetical protein OS=Arabidopsis thaliana OX=3702 GN=AT9943_LOCUS7879 PE=3 SV=1	62073	Oxidation (M)	99.2	359.49	31	26	26	25	27	26	26	26	25	29	26	29	18	16	86	99	78	105	103	102	106	92	122	117	107
36633	26872	31786	36705	30248	22006	36106	34989	40410	37723	48526	P21238	Chaperonin 60 subunit alpha 1 chloroplastic OS=Arabidopsis thaliana OX=3702 GN=CPN60A1 PE=1 SV=2	62072	Oxidation (M)	99.2	359.49	31	26	26	25	27	26	26	26	25	29	26	29	18	16	86	99	78	105	103	102	106	92	122	117	107
8859.7	4386.2	4745.9	10020	6231.2	3512.2	8369.4	9234.7	9026.3	7820.9	8271.2	Q9LPW0	Glyceraldehyde-3-phosphate dehydrogenase GAPA2 chloroplastic OS=Arabidopsis thaliana OX=3702 GN=GAPA2 PE=2 SV=1	42847	Carbamidomethylation; Oxidation (M)	99.2	316.51	38	30	30	30	32	30	30	30	30	34	30	30	16	4	100	86	97	107	86	68	106	101	123	98	123
8859.7	4386.2	4745.9	10020	6231.2	3512.2	8369.4	9234.7	9026.3	7820.9	8271.2	A0A178WA64	Glyceraldehyde-3-phosphate dehydrogenase OS=Arabidopsis thaliana OX=3702 GN=AXX17_At1g13340 PE=3 SV=1	42847	Carbamidomethylation; Oxidation (M)	99.2	316.51	38	30	30	30	32	30	30	30	30	34	30	30	16	4	100	86	97	107	86	68	106	101	123	98	123
8859.7	4386.2	4745.9	10020	6231.2	3512.2	8369.4	9234.7	9026.3	7820.9	8271.2	A0A1P8APR6	Glyceraldehyde-3-phosphate dehydrogenase OS=Arabidopsis thaliana OX=3702 GN=GAPA-2 PE=1 SV=1	47604	Carbamidomethylation; Oxidation (M)	99.2	316.51	34	27	27	27	29	27	27	27	27	31	27	27	16	4	100	86	97	107	86	68	106	101	123	98	123
57023	30316	47046	59131	40815	21559	59269	62442	71994	59579	62509	Q42029	Oxygen-evolving enhancer protein 2-1 chloroplastic OS=Arabidopsis thaliana OX=3702 GN=PSBP1 PE=1 SV=2	28095	Oxidation (M)	99.1	293.72	34	34	14	21	34	26	16	32	34	34	34	26	9	9	97	71	74	111	92	72	96	120	121	109	114
57023	30316	47046	59131	40815	21559	59269	62442	71994	59579	62509	A0A178W7Q1	(thale cress) hypothetical protein OS=Arabidopsis thaliana OX=3702 GN=AXX17_At1g06320 PE=4 SV=1	28095	Oxidation (M)	99.1	293.72	34	34	14	21	34	26	16	32	34	34	34	26	9	9	97	71	74	111	92	72	96	120	121	109	114
8033.1	8388.9	4166.2	10313	8666.8	7583	9825.8	6435.7	9800.9	9528.5	5705.7	A0A178W724	(thale cress) hypothetical protein OS=Arabidopsis thaliana OX=3702 GN=AXX17_At1g50100 PE=3 SV=1	63809	Carbamidomethylation; Oxidation (M)	99.2	421.14	54	42	34	32	51	42	31	48	47	51	47	46	31	7	78	82	80	122	87	64	93	88	130	108	118
8033.1	8388.9	4166.2	10313	8666.8	7583	9825.8	6435.7	9800.9	9528.5	5705.7	P21240	Chaperonin 60 subunit beta 1 chloroplastic OS=Arabidopsis thaliana OX=3702 GN=CPN60B1 PE=1 SV=3	63809	Carbamidomethylation; Oxidation (M)	99.2	421.14	54	42	34	32	51	42	31	48	47	51	47	46	31	7	78	82	80	122	87	64	93	88	130	108	118
34024	26921	34123	28921	22866	17242	32697	33854	36366	27882	29220	Q9SZJ5	Serine hydroxymethyltransferase 1 mitochondrial OS=Arabidopsis thaliana OX=3702 GN=SHM1 PE=1 SV=1	57401	Carbamidomethylation; Oxidation (M)	99.2	376.63	38	34	29	32	32	26	17	33	32	33	34	34	21	21	118	70	100	107	74	45	98	84	123	101	101
34024	26921	34123	28921	22866	17242	32697	33854	36366	27882	29220	A0A178UYX1	Serine hydroxymethyltransferase OS=Arabidopsis thaliana OX=3702 GN=AXX17_At4g43250 PE=3 SV=1	57401	Carbamidomethylation; Oxidation (M)	99.2	376.63	38	34	29	32	32	26	17	33	32	33	34	34	21	21	118	70	100	107	74	45	98	84	123	101	101
50965	33197	43345	46565	34395	21849	49481	48596	54634	47726	47188	P46283	Sedoheptulose-1 7-bisphosphatase chloroplastic OS=Arabidopsis thaliana OX=3702 GN=At3g55800 PE=2 SV=1	42414	Carbamidomethylation; Oxidation (M)	99.2	356.82	37	37	36	36	37	37	36	37	37	37	37	37	17	17	94	76	82	94	84	76	101	96	101	97	96
53456	40936	42973	44860	40504	36067	51025	42452	45377	46477	51139	A0A7G2DT05	(thale cress) hypothetical protein OS=Arabidopsis thaliana OX=3702 GN=AT9943_LOCUS1187 PE=3 SV=1	53267	Oxidation (M); Acetylation (N-term)	99.2	326.01	25	25	23	24	25	24	23	24	25	25	25	25	14	14	94	86	90	90	90	80	100	95	90	91	86
53456	40936	42973	44860	40504	36067	51025	42452	45377	46477	51139	A0A7G2DQK5	(thale cress) hypothetical protein OS=Arabidopsis thaliana OX=3702 GN=AT9943_LOCUS1187 PE=3 SV=1	53395	Oxidation (M); Acetylation (N-term)	99.2	326.01	25	25	23	24	25	24	23	24	25	25	25	25	14	14	94	86	90	90	90	80	100	95	90	91	86
53456	40936	42973	44860	40504	36067	51025	42452	45377	46477	51139	Q9XI93	Nodulin-related protein 2 OS=Arabidopsis thaliana OX=3702 GN=At1g13930 PE=1 SV=1	16164	Oxidation (M); Acetylation (N-term)	99.2	326.01	77	77	72	74	77	74	72	74	77	77	76	77	14	14	94	86	90	90	90	80	100	95	90	91	86
53456	40936	42973	44860	40504	36067	51025	42452	45377	46477	51139	A0A178W8F9	Nodulin-related protein 1 OS=Arabidopsis thaliana OX=3702 GN=AXX17_At1g14450 PE=1 SV=1	16164	Oxidation (M); Acetylation (N-term)	99.2	326.01	77	77	72	74	77	74	72	74	77	77	76	77	14	14	94	86	90	90	90	80	100	95	90	91	86
804.34	419.85	553.65	228.63	255.27	166.75	548.37	358.64	377.29	320.26	373.4	A0A178UL64	(thale cress) hypothetical protein OS=Arabidopsis thaliana OX=3702 GN=AXX17_At5g01630 PE=3 SV=1	71358	Carbamidomethylation; Oxidation (M)	99.2	370.02	34	29	22	24	33	29	25	27	27	30	29	30	26	3	84	63	65	137	90	66	70	60	97	102	125
804.34	419.85	553.65	228.63	255.27	166.75	548.37	358.64	377.29	320.26	373.4	P22953	Heat shock 70 kDa protein 1 OS=Arabidopsis thaliana OX=3702 GN=HSP70-1 PE=1 SV=3	71358	Carbamidomethylation; Oxidation (M)	99.2	370.02	34	29	22	24	33	29	25	27	27	30	29	30	26	3	84	63	65	137	90	66	70	60	97	102	125
23700	11228	16875	25202	13465	8543.1	22102	21336	31526	23563	25933	A0A178W6T5	(thale cress) hypothetical protein OS=Arabidopsis thaliana OX=3702 GN=AXX17_At1g09240 PE=4 SV=1	42620	Carbamidomethylation; Oxidation (M)	99.2	327.48	37	30	22	26	33	26	22	34	30	33	29	26	14	14	93	54	69	106	75	57	101	85	116	99	104
23700	11228	16875	25202	13465	8543.1	22102	21336	31526	23563	25933	Q9SA52	Chloroplast stem-loop binding protein of 41 kDa b chloroplastic OS=Arabidopsis thaliana OX=3702 GN=CSP41B PE=1 SV=1	42620	Carbamidomethylation; Oxidation (M)	99.2	327.48	37	30	22	26	33	26	22	34	30	33	29	26	14	14	93	54	69	106	75	57	101	85	116	99	104
23700	11228	16875	25202	13465	8543.1	22102	21336	31526	23563	25933	A0A1P8ATL2	Chloroplast RNA binding protein OS=Arabidopsis thaliana OX=3702 GN=CRB PE=1 SV=1	43266	Carbamidomethylation; Oxidation (M)	99.2	327.48	37	30	22	26	33	26	22	34	30	33	28	26	14	14	93	54	69	106	75	57	101	85	116	99	104
571.49	447.78	578.89	523.4	405.92	229.86	566.79	507.71	456.49	505.71	574.41	P04778	Chlorophyll a-b binding protein 1 chloroplastic OS=Arabidopsis thaliana OX=3702 GN=LHCB1.3 PE=1 SV=1	28241	Oxidation (M); Acetylation (N-term)	99	257.8	22	22	22	22	16	16	16	22	16	16	16	15	6	1	86	83	83	89	82	75	101	88	81	94	97
571.49	447.78	578.89	523.4	405.92	229.86	566.79	507.71	456.49	505.71	574.41	A0A178WKX1	Chlorophyll a-b binding protein chloroplastic OS=Arabidopsis thaliana OX=3702 GN=AXX17_At1g30320 PE=3 SV=1	28241	Oxidation (M); Acetylation (N-term)	99	257.8	22	22	22	22	16	16	16	22	16	16	16	15	6	1	86	83	83	89	82	75	101	88	81	94	97
2334.8	978.32	2503.4	3610.2	3384.3	2607.2	2307.3	729.36	3599.3	3855.6	3974.8	A0A654F8G7	Chaperonin 60 subunit beta 2 chloroplastic OS=Arabidopsis thaliana OX=3702 GN=At3g13470 PE=3 SV=1	62958	Carbamidomethylation; Oxidation (M)	99.2	409.63	52	40	35	33	48	44	31	45	42	48	48	44	29	5	70	70	73	108	82	51	86	82	119	100	110
2334.8	978.32	2503.4	3610.2	3384.3	2607.2	2307.3	729.36	3599.3	3855.6	3974.8	A0A178VIX7	(thale cress) hypothetical protein OS=Arabidopsis thaliana OX=3702 GN=AXX17_At3g13810 PE=3 SV=1	63328	Carbamidomethylation; Oxidation (M)	99.2	409.63	52	40	34	32	47	44	30	44	42	47	48	43	29	5	70	70	73	108	82	51	86	82	119	100	110
2334.8	978.32	2503.4	3610.2	3384.3	2607.2	2307.3	729.36	3599.3	3855.6	3974.8	Q9LJE4	Chaperonin 60 subunit beta 2 chloroplastic OS=Arabidopsis thaliana OX=3702 GN=CPN60B2 PE=1 SV=1	63342	Carbamidomethylation; Oxidation (M)	99.2	409.63	52	40	34	32	47	44	30	44	42	47	48	43	29	5	70	70	73	108	82	51	86	82	119	100	110
	36.306	22.336	0	21.62			0	11.443		106.88	Q8VZ87	Chlorophyll a-b binding protein 3 chloroplastic OS=Arabidopsis thaliana OX=3702 GN=LHCB1.2 PE=1 SV=2	28227	Oxidation (M); Acetylation (N-term)	99	243.04	23	17	23	23	17	17	11	17	17	17	11	16	6	1	84	81	80	87	83	73	97	88	81	90	99
	36.306	22.336	0	21.62			0	11.443		106.88	A0A178W2T0	Chlorophyll a-b binding protein chloroplastic OS=Arabidopsis thaliana OX=3702 GN=AXX17_At1g30300 PE=3 SV=1	28227	Oxidation (M); Acetylation (N-term)	99	243.04	23	17	23	23	17	17	11	17	17	17	11	16	6	1	84	81	80	87	83	73	97	88	81	90	99
	36.306	22.336	0	21.62			0	11.443		106.88	P0CJ48	Chlorophyll a-b binding protein 2 chloroplastic OS=Arabidopsis thaliana OX=3702 GN=LHCB1.1 PE=1 SV=1	28227	Oxidation (M); Acetylation (N-term)	99	243.04	23	17	23	23	17	17	11	17	17	17	11	16	6	1	84	81	80	87	83	73	97	88	81	90	99
129.65		61.695	340.07	172.8	0	141.91	305.77	193.35	199.26	0	A0A178VRB0	Chlorophyll a-b binding protein chloroplastic OS=Arabidopsis thaliana OX=3702 GN=AXX17_At2g30960 PE=3 SV=1	28054		99	244.5	18	17	11	17	17	17	17	17	18	17	17	16	6	2	82	75	80	87	82	74	94	88	80	91	96
129.65		61.695	340.07	172.8	0	141.91	305.77	193.35	199.26	0	Q39141	Chlorophyll a-b binding protein chloroplastic OS=Arabidopsis thaliana OX=3702 GN=Lhb1B2 PE=1 SV=1	28054		99	244.5	18	17	11	17	17	17	17	17	18	17	17	16	6	2	82	75	80	87	82	74	94	88	80	91	96
2140.2	1422.1	1871.4	4189.7	1888.1	1413.9	2786.3	2135.5	3551.1	3406.7	3609.7	O65719	Heat shock 70 kDa protein 3 OS=Arabidopsis thaliana OX=3702 GN=HSP70-3 PE=1 SV=1	71148	Carbamidomethylation; Oxidation (M)	99.2	363.35	37	27	23	24	33	29	27	28	29	33	30	32	25	7	68	62	57	131	87	64	76	59	101	107	114
2140.2	1422.1	1871.4	4189.7	1888.1	1413.9	2786.3	2135.5	3551.1	3406.7	3609.7	A0A178VI76	(thale cress) hypothetical protein OS=Arabidopsis thaliana OX=3702 GN=AXX17_At3g09090 PE=1 SV=1	71148	Carbamidomethylation; Oxidation (M)	99.2	363.35	37	27	23	24	33	29	27	28	29	33	30	32	25	7	68	62	57	131	87	64	76	59	101	107	114
37111	19875	34224	31998	26768	15686	34184	41448	43346	35088	37579	Q07473	Chlorophyll a-b binding protein CP29.1 chloroplastic OS=Arabidopsis thaliana OX=3702 GN=LHCB4.1 PE=1 SV=1	31139		99.1	264.2	22	22	20	20	22	22	20	22	22	22	22	22	7	4	92	59	70	81	73	61	96	98	116	85	85
37111	19875	34224	31998	26768	15686	34184	41448	43346	35088	37579	A0A7G2F4T1	Chlorophyll a-b binding protein chloroplastic OS=Arabidopsis thaliana OX=3702 GN=AT9943_LOCUS18046 PE=3 SV=1	31125		99.1	264.2	22	22	20	20	22	22	20	22	22	22	22	22	7	4	92	59	70	81	73	61	96	98	116	85	85
37111	19875	34224	31998	26768	15686	34184	41448	43346	35088	37579	A0A384LC70	Chlorophyll a-b binding protein chloroplastic OS=Arabidopsis thaliana OX=3702 GN=AXX17_At5g00570 PE=3 SV=1	31139		99.1	264.2	22	22	20	20	22	22	20	22	22	22	22	22	7	4	92	59	70	81	73	61	96	98	116	85	85
37111	19875	34224	31998	26768	15686	34184	41448	43346	35088	37579	Q0WW97	Chlorophyll a-b binding protein chloroplastic OS=Arabidopsis thaliana OX=3702 GN=At5g01530 PE=2 SV=1	31139		99.1	264.2	22	22	20	20	22	22	20	22	22	22	22	22	7	4	92	59	70	81	73	61	96	98	116	85	85
26562	16421	20346	25141	19997	14084	24824	22679	28915	27409	28522	Q7FY22	AT4g28750 OS=Arabidopsis thaliana OX=3702 GN=At4g28750 PE=2 SV=1	11710		99	287.51	73	73	54	54	73	54	54	73	73	73	73	54	5	3	80	69	68	93	79	79	89	83	98	86	82
26562	16421	20346	25141	19997	14084	24824	22679	28915	27409	28522	Q9FDY5	Putative photosystem I subunit PSI-E (Fragment) OS=Arabidopsis thaliana OX=3702 GN=At4g28750 PE=2 SV=2	12254		99	287.51	70	70	51	51	70	51	51	70	70	70	70	51	5	3	80	69	68	93	79	79	89	83	98	86	82
26562	16421	20346	25141	19997	14084	24824	22679	28915	27409	28522	Q8H127	Putative photosystem I subunit PSI-E protein OS=Arabidopsis thaliana OX=3702 GN=At4g28750 PE=2 SV=1	14765		99	287.51	57	57	42	42	57	42	42	57	57	57	57	42	5	3	80	69	68	93	79	79	89	83	98	86	82
26562	16421	20346	25141	19997	14084	24824	22679	28915	27409	28522	Q9S831	Photosystem I reaction center subunit IV A chloroplastic OS=Arabidopsis thaliana OX=3702 GN=PSAE1 PE=1 SV=1	14967		99	287.51	56	56	41	41	56	41	41	56	56	56	56	41	5	3	80	69	68	93	79	79	89	83	98	86	82
26562	16421	20346	25141	19997	14084	24824	22679	28915	27409	28522	A0A178V4E9	(thale cress) hypothetical protein OS=Arabidopsis thaliana OX=3702 GN=AXX17_At4g33090 PE=3 SV=1	14967		99	287.51	56	56	41	41	56	41	41	56	56	56	56	41	5	3	80	69	68	93	79	79	89	83	98	86	82
20745	17901	19313	15104	12916	12109	21798	15812	19898	15233	18607	A0A178UE63	(thale cress) hypothetical protein OS=Arabidopsis thaliana OX=3702 GN=AXX17_At5g49710 PE=3 SV=1	103453	Carbamidomethylation; Oxidation (M)	99.2	394.33	32	27	21	25	25	24	23	29	28	29	25	25	29	27	86	68	87	78	74	64	102	87	93	81	82
20745	17901	19313	15104	12916	12109	21798	15812	19898	15233	18607	Q9FI56	Chaperone protein ClpC1 chloroplastic OS=Arabidopsis thaliana OX=3702 GN=CLPC1 PE=1 SV=1	103453	Carbamidomethylation; Oxidation (M)	99.2	394.33	32	27	21	25	25	24	23	29	28	29	25	25	29	27	86	68	87	78	74	64	102	87	93	81	82
38723	26695	33314	43132	34803	26704	39004	37244	48078	50390	51249	C0SVP9	Uncharacterized protein At5g15970 (Fragment) OS=Arabidopsis thaliana OX=3702 GN=At5g15970 PE=2 SV=1	6551	Acetylation (N-term)	99	368.62	91	91	91	91	91	91	91	91	91	91	91	91	11	8	74	62	71	89	79	66	75	74	95	98	93
38723	26695	33314	43132	34803	26704	39004	37244	48078	50390	51249	A0A384KRF8	(thale cress) hypothetical protein OS=Arabidopsis thaliana OX=3702 GN=AXX17_At5g15540 PE=4 SV=1	6551	Acetylation (N-term)	99	368.62	91	91	91	91	91	91	91	91	91	91	91	91	11	8	74	62	71	89	79	66	75	74	95	98	93
38723	26695	33314	43132	34803	26704	39004	37244	48078	50390	51249	P31169	Stress-induced protein KIN2 OS=Arabidopsis thaliana OX=3702 GN=KIN2 PE=1 SV=1	6551	Acetylation (N-term)	99	368.62	91	91	91	91	91	91	91	91	91	91	91	91	11	8	74	62	71	89	79	66	75	74	95	98	93
18053	11658	16480	19715	13616	7889.7	19521	18696	22487	18213	18838	A0A178VDZ1	PTAC16 OS=Arabidopsis thaliana OX=3702 GN=AXX17_At3g40690 PE=4 SV=1	54344	Oxidation (M)	99.2	387.27	48	42	32	42	46	42	32	42	45	46	47	47	23	23	84	49	69	90	73	55	93	87	88	89	85
18053	11658	16480	19715	13616	7889.7	19521	18696	22487	18213	18838	A0A654FDF6	(thale cress) hypothetical protein OS=Arabidopsis thaliana OX=3702 GN=AN1_LOCUS15011 PE=4 SV=1	54358	Oxidation (M)	99.2	387.27	48	42	32	42	46	42	32	42	45	46	47	47	23	23	84	49	69	90	73	55	93	87	88	89	85
18053	11658	16480	19715	13616	7889.7	19521	18696	22487	18213	18838	Q9STF2	Protein PLASTID TRANSCRIPTIONALLY ACTIVE 16 chloroplastic OS=Arabidopsis thaliana OX=3702 GN=PTAC16 PE=1 SV=1	54358	Oxidation (M)	99.2	387.27	48	42	32	42	46	42	32	42	45	46	47	47	23	23	84	49	69	90	73	55	93	87	88	89	85
46.381	0		11959	6818	4996.8	52.567	0	8017.9	10659	10044	Q9LHA8	Heat shock 70 kDa protein 4 OS=Arabidopsis thaliana OX=3702 GN=HSP70-4 PE=1 SV=1	71102	Carbamidomethylation; Oxidation (M)	99.2	361.08	35	20	17	14	33	27	24	20	19	30	30	30	25	7	51	44	42	132	90	70	47	43	95	112	130
46.381	0		11959	6818	4996.8	52.567	0	8017.9	10659	10044	A0A178VCC0	HSP70 OS=Arabidopsis thaliana OX=3702 GN=AXX17_At3g12610 PE=3 SV=1	71102	Carbamidomethylation; Oxidation (M)	99.2	361.08	35	20	17	14	33	27	24	20	19	30	30	30	25	7	51	44	42	132	90	70	47	43	95	112	130
46.381	0		11959	6818	4996.8	52.567	0	8017.9	10659	10044	A0A7G2ELB8	(thale cress) hypothetical protein OS=Arabidopsis thaliana OX=3702 GN=AT9943_LOCUS10826 PE=3 SV=1	71128	Carbamidomethylation; Oxidation (M)	99.2	361.08	35	20	17	14	33	27	24	20	19	30	30	30	25	7	51	44	42	132	90	70	47	43	95	112	130
39019	28107	35717	37493	34465	23702	36980	38983	41484	40649	43340	Q9SUI4	Photosystem I reaction center subunit XI chloroplastic OS=Arabidopsis thaliana OX=3702 GN=PSAL PE=1 SV=2	23052		99	263.59	17	17	17	17	17	17	17	17	17	17	17	17	6	6	89	57	64	80	72	50	81	75	89	87	90
39019	28107	35717	37493	34465	23702	36980	38983	41484	40649	43340	A0A5S9XRT0	PSI subunit V OS=Arabidopsis thaliana OX=3702 GN=AN1_LOCUS17884 PE=3 SV=1	23052		99	263.59	17	17	17	17	17	17	17	17	17	17	17	17	6	6	89	57	64	80	72	50	81	75	89	87	90
39019	28107	35717	37493	34465	23702	36980	38983	41484	40649	43340	A0A1P8B6D0	PSI subunit V OS=Arabidopsis thaliana OX=3702 GN=PSAL PE=1 SV=1	30441		99	263.59	14	14	13	14	14	14	13	14	14	14	14	14	6	6	89	57	64	80	72	50	81	75	89	87	90
											P22954	Heat shock 70 kDa protein 2 OS=Arabidopsis thaliana OX=3702 GN=HSP70-2 PE=1 SV=2	71387	Carbamidomethylation; Oxidation (M)	99.2	352	28	21	15	17	26	23	19	20	21	22	23	22	21	0	68	52	56	121	77	59	55	52	84	93	109
											A0A178UTH3	(thale cress) hypothetical protein OS=Arabidopsis thaliana OX=3702 GN=AXX17_At5g01620 PE=3 SV=1	71387	Carbamidomethylation; Oxidation (M)	99.2	352	28	21	15	17	26	23	19	20	21	22	23	22	21	0	68	52	56	121	77	59	55	52	84	93	109
11827	3639.8	8033.7	11288	17552	3343.4	19271	10822	13845	9340.5	14467	A0A1B1W4S7	Photosystem II protein D1 OS=Arabidopsis thaliana OX=3702 GN=psbA PE=3 SV=1	38937	Carbamidomethylation; Oxidation (M)	99.1	231.43	19	19	12	12	19	16	13	16	13	19	16	12	6	6	78	71	69	76	71	54	77	68	91	76	90
11827	3639.8	8033.7	11288	17552	3343.4	19271	10822	13845	9340.5	14467	A0A8F5S3Q3	Photosystem II protein D1 OS=Arabidopsis thaliana OX=3702 GN=psbA PE=3 SV=1	38949	Carbamidomethylation; Oxidation (M)	99.1	231.43	19	19	12	12	19	16	13	16	13	19	16	12	6	6	78	71	69	76	71	54	77	68	91	76	90
11827	3639.8	8033.7	11288	17552	3343.4	19271	10822	13845	9340.5	14467	A0A7G2FL73	Photosystem II protein D1 OS=Arabidopsis thaliana OX=3702 GN=psbA PE=3 SV=1	38937	Carbamidomethylation; Oxidation (M)	99.1	231.43	19	19	12	12	19	16	13	16	13	19	16	12	6	6	78	71	69	76	71	54	77	68	91	76	90
11827	3639.8	8033.7	11288	17552	3343.4	19271	10822	13845	9340.5	14467	A0A8F5V7A7	Photosystem II protein D1 OS=Arabidopsis thaliana OX=3702 GN=psbA PE=3 SV=1	38951	Carbamidomethylation; Oxidation (M)	99.1	231.43	19	19	12	12	19	16	13	16	13	19	16	12	6	6	78	71	69	76	71	54	77	68	91	76	90
11827	3639.8	8033.7	11288	17552	3343.4	19271	10822	13845	9340.5	14467	P83755	Photosystem II protein D1 OS=Arabidopsis thaliana OX=3702 GN=psbA PE=1 SV=2	38937	Carbamidomethylation; Oxidation (M)	99.1	231.43	19	19	12	12	19	16	13	16	13	19	16	12	6	6	78	71	69	76	71	54	77	68	91	76	90
37312	20177	29053	37799	29968	15824	35283	43224	41855	35344	36052	A0A1B1W4X0	Photosystem II CP47 reaction center protein OS=Arabidopsis thaliana OX=3702 GN=psbB PE=3 SV=1	56037	Oxidation (M)	99.2	296.39	16	14	12	14	16	14	14	14	16	16	14	14	9	4	72	50	66	80	53	39	90	102	98	95	71
37312	20177	29053	37799	29968	15824	35283	43224	41855	35344	36052	P56777	Photosystem II CP47 reaction center protein OS=Arabidopsis thaliana OX=3702 GN=psbB PE=1 SV=1	56037	Oxidation (M)	99.2	296.39	16	14	12	14	16	14	14	14	16	16	14	14	9	4	72	50	66	80	53	39	90	102	98	95	71
15050	14830	16721	13985	13360	10058	17665	12011	16289	13027	18399	A0A654G2F8	5-methyltetrahydropteroyltriglutamate--homocysteine S-methyltransferase OS=Arabidopsis thaliana OX=3702 GN=AN1_LOCUS22573 PE=3 SV=1	84357	Carbamidomethylation; Oxidation (M); Acetylation (N-term)	99.2	334.82	23	18	16	21	22	17	14	20	19	20	19	21	21	10	73	68	77	80	62	51	88	78	91	69	77
15050	14830	16721	13985	13360	10058	17665	12011	16289	13027	18399	A0A178UNW3	5-methyltetrahydropteroyltriglutamate--homocysteine S-methyltransferase OS=Arabidopsis thaliana OX=3702 GN=AXX17_At5g17640 PE=3 SV=1	84375	Carbamidomethylation; Oxidation (M); Acetylation (N-term)	99.2	334.82	23	18	16	21	22	17	14	20	19	20	19	21	21	10	73	68	77	80	62	51	88	78	91	69	77
15050	14830	16721	13985	13360	10058	17665	12011	16289	13027	18399	O50008	5-methyltetrahydropteroyltriglutamate--homocysteine methyltransferase 1 OS=Arabidopsis thaliana OX=3702 GN=MS1 PE=1 SV=1	84357	Carbamidomethylation; Oxidation (M); Acetylation (N-term)	99.2	334.82	23	18	16	21	22	17	14	20	19	20	19	21	21	10	73	68	77	80	62	51	88	78	91	69	77
24231	10368	14436	26001	7091.9	8534.5	22991	21620	30305	20962	25515	A0A178UY83	Elongation factor Tu OS=Arabidopsis thaliana OX=3702 GN=AXX17_At4g23840 PE=3 SV=1	51630	Oxidation (M)	99.2	322.79	30	26	19	19	28	23	19	22	26	28	29	26	13	13	79	41	46	100	58	44	81	85	102	84	87
24231	10368	14436	26001	7091.9	8534.5	22991	21620	30305	20962	25515	P17745	Elongation factor Tu chloroplastic OS=Arabidopsis thaliana OX=3702 GN=TUFA PE=1 SV=1	51630	Oxidation (M)	99.2	322.79	30	26	19	19	28	23	19	22	26	28	29	26	13	13	79	41	46	100	58	44	81	85	102	84	87
7278.5	1363	4276.3	3856.5	5177.7	4169.9	6205.4	6213.7	5251.4	7281.9	6909.4	Q8LC58	Photosystem I reaction center subunit IV B chloroplast (PSI-E B) OS=Arabidopsis thaliana OX=3702 GN=At2g20260 PE=2 SV=1	14987		99	294.1	56	56	56	42	56	56	42	56	56	56	56	56	6	4	67	63	59	86	71	77	73	70	82	81	74
7278.5	1363	4276.3	3856.5	5177.7	4169.9	6205.4	6213.7	5251.4	7281.9	6909.4	Q9S714	Photosystem I reaction center subunit IV B chloroplastic OS=Arabidopsis thaliana OX=3702 GN=PSAE2 PE=2 SV=1	15189		99	294.1	55	55	55	41	55	55	41	55	55	55	55	55	6	4	67	63	59	86	71	77	73	70	82	81	74
7278.5	1363	4276.3	3856.5	5177.7	4169.9	6205.4	6213.7	5251.4	7281.9	6909.4	A0A5S9WZU5	Photosystem I reaction center subunit IV A OS=Arabidopsis thaliana OX=3702 GN=C24_LOCUS8234 PE=3 SV=1	15189		99	294.1	55	55	55	41	55	55	41	55	55	55	55	55	6	4	67	63	59	86	71	77	73	70	82	81	74
44961	34828	45093	43159	32417	23547	44387	46396	48449	39887	46750	A0A7G2FJJ0	Cytochrome f OS=Arabidopsis thaliana OX=3702 GN=petA PE=3 SV=1	35357	Oxidation (M)	99.2	326.7	39	35	34	35	35	32	34	35	36	39	32	35	12	12	79	47	72	78	60	44	76	76	101	81	85
44961	34828	45093	43159	32417	23547	44387	46396	48449	39887	46750	A0A1B1W4V8	Cytochrome f OS=Arabidopsis thaliana OX=3702 GN=petA PE=3 SV=1	35357	Oxidation (M)	99.2	326.7	39	35	34	35	35	32	34	35	36	39	32	35	12	12	79	47	72	78	60	44	76	76	101	81	85
44961	34828	45093	43159	32417	23547	44387	46396	48449	39887	46750	P56771	Cytochrome f OS=Arabidopsis thaliana OX=3702 GN=petA PE=3 SV=1	35357	Oxidation (M)	99.2	326.7	39	35	34	35	35	32	34	35	36	39	32	35	12	12	79	47	72	78	60	44	76	76	101	81	85
12633	8278.9	11379	13679	10015	7943.1	15465	11692	13000	13399	15356	Q9SIN5	Protein COLD-REGULATED 15B chloroplastic OS=Arabidopsis thaliana OX=3702 GN=COR15B PE=1 SV=1	14961		99.1	323.95	55	54	44	44	54	45	44	54	54	54	54	54	16	11	64	60	65	84	72	62	82	62	88	84	72
12633	8278.9	11379	13679	10015	7943.1	15465	11692	13000	13399	15356	A0A178VM34	COR15B OS=Arabidopsis thaliana OX=3702 GN=AXX17_At2g39910 PE=4 SV=1	14961		99.1	323.95	55	54	44	44	54	45	44	54	54	54	54	54	16	11	64	60	65	84	72	62	82	62	88	84	72
14654	10870	11665	16547	14307	12838	16606	13607	16106	17413	19242	A0A5S9X6D7	(thale cress) hypothetical protein OS=Arabidopsis thaliana OX=3702 GN=AN1_LOCUS10758 PE=4 SV=1	14605		99.1	304.03	51	41	41	35	51	41	41	51	51	51	51	41	15	10	67	53	68	79	69	54	74	57	85	91	73
14654	10870	11665	16547	14307	12838	16606	13607	16106	17413	19242	Q42512	Protein COLD-REGULATED 15A chloroplastic OS=Arabidopsis thaliana OX=3702 GN=COR15A PE=1 SV=1	14605		99.1	304.03	51	41	41	35	51	41	41	51	51	51	51	41	15	10	67	53	68	79	69	54	74	57	85	91	73
29232	19508	22504	26578	20415	17493	25897	24893	31079	27823	27046	Q42139	AT4g32260/F10M6_100 OS=Arabidopsis thaliana OX=3702 GN=PDE334 PE=1 SV=2	23918	Oxidation (M)	99.2	301.8	42	39	32	39	41	39	38	39	41	41	39	39	12	12	74	41	44	86	56	48	70	77	89	80	64
29232	19508	22504	26578	20415	17493	25897	24893	31079	27823	27046	A0A178V017	(thale cress) hypothetical protein OS=Arabidopsis thaliana OX=3702 GN=At4g32260 PE=1 SV=1	23918	Oxidation (M)	99.2	301.8	42	39	32	39	41	39	38	39	41	41	39	39	12	12	74	41	44	86	56	48	70	77	89	80	64
37039	25642	30234	36631	32060	25936	31461	34643	40286	34476	40979	A0A8F5P166	Photosystem I P700 chlorophyll a apoprotein A2 OS=Arabidopsis thaliana OX=3702 GN=psaB PE=3 SV=1	82369	Carbamidomethylation	99.1	262.42	10	8	8	8	10	8	8	8	10	10	8	10	7	7	65	53	62	74	65	51	68	67	80	66	77
37039	25642	30234	36631	32060	25936	31461	34643	40286	34476	40979	P56767	Photosystem I P700 chlorophyll a apoprotein A2 OS=Arabidopsis thaliana OX=3702 GN=psaB PE=1 SV=1	82475	Carbamidomethylation	99.1	262.42	10	8	8	8	10	8	8	8	10	10	8	10	7	7	65	53	62	74	65	51	68	67	80	66	77
37039	25642	30234	36631	32060	25936	31461	34643	40286	34476	40979	A0A1B1W4U2	Photosystem I P700 chlorophyll a apoprotein A2 OS=Arabidopsis thaliana OX=3702 GN=psaB PE=3 SV=1	82475	Carbamidomethylation	99.1	262.42	10	8	8	8	10	8	8	8	10	10	8	10	7	7	65	53	62	74	65	51	68	67	80	66	77
46253	27886	39838	39077	28704	24171	35291	36878	46547	42059	43753	A0A7G2EV18	(thale cress) hypothetical protein OS=Arabidopsis thaliana OX=3702 GN=AT9943_LOCUS14843 PE=3 SV=1	40089	Carbamidomethylation; Oxidation (M)	99.2	344.37	32	25	13	21	29	29	21	29	29	24	25	28	11	11	64	46	64	70	70	64	66	59	77	66	69
46253	27886	39838	39077	28704	24171	35291	36878	46547	42059	43753	A0A178USQ7	ATPC1 OS=Arabidopsis thaliana OX=3702 GN=AXX17_At4g05690 PE=3 SV=1	40911	Carbamidomethylation; Oxidation (M)	99.2	344.37	32	25	13	21	28	28	21	28	28	24	25	27	11	11	64	46	64	70	70	64	66	59	77	66	69
46253	27886	39838	39077	28704	24171	35291	36878	46547	42059	43753	Q01908	ATP synthase gamma chain 1 chloroplastic OS=Arabidopsis thaliana OX=3702 GN=ATPC1 PE=1 SV=1	40911	Carbamidomethylation; Oxidation (M)	99.2	344.37	32	25	13	21	28	28	21	28	28	24	25	27	11	11	64	46	64	70	70	64	66	59	77	66	69
46253	27886	39838	39077	28704	24171	35291	36878	46547	42059	43753	Q9SUI9	ATP synthase gamma chain chloroplast (Fragment) OS=Arabidopsis thaliana OX=3702 GN=atpC1 PE=2 SV=1	33325	Carbamidomethylation; Oxidation (M)	99.2	344.37	39	31	16	25	35	35	25	35	35	29	31	34	11	11	64	46	64	70	70	64	66	59	77	66	69
		0	14.168			7.2936	76.15	504.99	77.42	20.01	A0A2P2CLF9	ATP synthase subunit alpha OS=Arabidopsis thaliana OX=3702 GN=atp1 PE=3 SV=1	55103	Oxidation (M)	99.2	291.4	27	21	18	24	24	20	19	22	22	24	24	26	16	2	66	50	63	74	60	48	75	52	66	72	72
39825	30177	33673	43478	37323	27433	37900	33220	44813	41537	46305	P49107	Photosystem I reaction center subunit N chloroplastic OS=Arabidopsis thaliana OX=3702 GN=PSAN PE=1 SV=2	18429	Carbamidomethylation	99.1	247.47	37	18	24	18	24	29	24	24	24	33	24	24	6	6	59	69	43	59	71	64	61	52	73	66	81
39825	30177	33673	43478	37323	27433	37900	33220	44813	41537	46305	A0A178UC65	(thale cress) hypothetical protein OS=Arabidopsis thaliana OX=3702 GN=AXX17_At5g63630 PE=3 SV=1	18429	Carbamidomethylation	99.1	247.47	37	18	24	18	24	29	24	24	24	33	24	24	6	6	59	69	43	59	71	64	61	52	73	66	81
29614	23219	30522	31913	27118	18244	35088	31074	37553	31637	34408	A0A5S9YFS8	Elongation factor 1-alpha OS=Arabidopsis thaliana OX=3702 GN=At1g07920 PE=3 SV=1	50311	Carbamidomethylation; Oxidation (M)	99.2	294.15	27	21	24	21	25	21	21	24	21	23	23	24	10	10	65	55	58	61	57	42	80	61	82	63	74
29614	23219	30522	31913	27118	18244	35088	31074	37553	31637	34408	A0A178WJC9	Elongation factor 1-alpha OS=Arabidopsis thaliana OX=3702 GN=AXX17_At1g07650 PE=3 SV=1	49502	Carbamidomethylation; Oxidation (M)	99.2	294.15	27	21	25	21	26	21	21	25	21	23	23	25	10	10	65	55	58	61	57	42	80	61	82	63	74
29614	23219	30522	31913	27118	18244	35088	31074	37553	31637	34408	Q8W4H7	Elongation factor 1-alpha 2 OS=Arabidopsis thaliana OX=3702 GN=A2 PE=1 SV=2	49502	Carbamidomethylation; Oxidation (M)	99.2	294.15	27	21	25	21	26	21	21	25	21	23	23	25	10	10	65	55	58	61	57	42	80	61	82	63	74
29614	23219	30522	31913	27118	18244	35088	31074	37553	31637	34408	Q0WL56	Elongation factor 1-alpha 3 OS=Arabidopsis thaliana OX=3702 GN=A3 PE=1 SV=2	49502	Carbamidomethylation; Oxidation (M)	99.2	294.15	27	21	25	21	26	21	21	25	21	23	23	25	10	10	65	55	58	61	57	42	80	61	82	63	74
29614	23219	30522	31913	27118	18244	35088	31074	37553	31637	34408	P0DH99	Elongation factor 1-alpha 1 OS=Arabidopsis thaliana OX=3702 GN=A1 PE=1 SV=1	49502	Carbamidomethylation; Oxidation (M)	99.2	294.15	27	21	25	21	26	21	21	25	21	23	23	25	10	10	65	55	58	61	57	42	80	61	82	63	74
29614	23219	30522	31913	27118	18244	35088	31074	37553	31637	34408	Q8GTY0	Elongation factor 1-alpha 4 OS=Arabidopsis thaliana OX=3702 GN=A4 PE=1 SV=2	49502	Carbamidomethylation; Oxidation (M)	99.2	294.15	27	21	25	21	26	21	21	25	21	23	23	25	10	10	65	55	58	61	57	42	80	61	82	63	74
32902	12971	21298	23260	19962	9170.7	34377	26575	41020	29863	25162	A0A8F5V9C1	Cytochrome b559 subunit alpha OS=Arabidopsis thaliana OX=3702 GN=psbE PE=3 SV=1	9414		84.4	150.36	25	25	25	25	25	25	25	25	25	25	25	25	2	2	78	32	55	71	50	30	77	76	81	71	69
32902	12971	21298	23260	19962	9170.7	34377	26575	41020	29863	25162	P56779	Cytochrome b559 subunit alpha OS=Arabidopsis thaliana OX=3702 GN=psbE PE=1 SV=4	9387		84.4	150.36	25	25	25	25	25	25	25	25	25	25	25	25	2	2	78	32	55	71	50	30	77	76	81	71	69
13294	6914.6	11330	13609	10367	5181.6	11301	16076	19579	12583	16108	Q9XF88	Chlorophyll a-b binding protein CP29.2 chloroplastic OS=Arabidopsis thaliana OX=3702 GN=LHCB4.2 PE=1 SV=1	31194		99.1	267.92	22	22	17	18	20	18	17	20	22	22	22	22	9	6	67	45	57	60	54	51	69	72	91	60	60
	0										A0A654GFL7	ATP synthase subunit alpha mitochondrial OS=Arabidopsis thaliana OX=3702 GN=AN1_LOCUS27138 PE=3 SV=1	75044	Oxidation (M)	99.2	281.03	19	15	14	17	17	14	14	15	14	15	16	18	15	1	66	51	61	71	60	48	72	47	61	69	71
	0										F4IMB5	ATP synthase subunit alpha mitochondrial OS=Arabidopsis thaliana OX=3702 GN=At2g07698 PE=1 SV=1	85933	Oxidation (M)	99.2	281.03	17	13	13	15	15	13	12	13	12	14	14	16	15	1	66	51	61	71	60	48	72	47	61	69	71
	0										A0A5S9YHX3	ATP synthase subunit alpha mitochondrial OS=Arabidopsis thaliana OX=3702 GN=C24_LOCUS26937 PE=3 SV=1	85883	Oxidation (M)	99.2	281.03	17	13	13	15	15	13	12	13	12	14	14	16	15	1	66	51	61	71	60	48	72	47	61	69	71
4980.2	2771.4	3831.5	4726.7	3344	1794	5464.4	4876.7	6013.5	5345.6	4881	Q9FH02	ATP-dependent zinc metalloprotease FTSH 5 chloroplastic OS=Arabidopsis thaliana OX=3702 GN=FTSH5 PE=1 SV=1	75232	Carbamidomethylation; Oxidation (M)	99.2	356.84	30	29	24	24	26	22	24	29	26	27	25	27	19	8	68	40	58	70	61	45	69	66	70	55	73
4980.2	2771.4	3831.5	4726.7	3344	1794	5464.4	4876.7	6013.5	5345.6	4881	A0A178U8J6	VAR1 OS=Arabidopsis thaliana OX=3702 GN=AXX17_At5g40110 PE=3 SV=1	75232	Carbamidomethylation; Oxidation (M)	99.2	356.84	30	29	24	24	26	22	24	29	26	27	25	27	19	8	68	40	58	70	61	45	69	66	70	55	73
4980.2	2771.4	3831.5	4726.7	3344	1794	5464.4	4876.7	6013.5	5345.6	4881	A0A5S9YAJ7	AAA domain-containing protein OS=Arabidopsis thaliana OX=3702 GN=C24_LOCUS24236 PE=3 SV=1	75218	Carbamidomethylation; Oxidation (M)	99.2	356.84	30	29	24	24	26	22	24	29	26	27	25	27	19	8	68	40	58	70	61	45	69	66	70	55	73
1660.6	2089.2	1962.4	1590.1	1763.2	1486.1	1754.9	1920.1	1418.5	1733.3	935.61	A0A178W4Q5	Glyceraldehyde-3-phosphate dehydrogenase OS=Arabidopsis thaliana OX=3702 GN=AXX17_At1g13910 PE=3 SV=1	36913	Carbamidomethylation; Oxidation (M)	99.2	330.8	49	40	34	25	46	42	29	46	41	46	43	46	19	1	63	55	48	64	60	50	70	55	77	57	66
1660.6	2089.2	1962.4	1590.1	1763.2	1486.1	1754.9	1920.1	1418.5	1733.3	935.61	Q9FX54	Glyceraldehyde-3-phosphate dehydrogenase GAPC2 cytosolic OS=Arabidopsis thaliana OX=3702 GN=GAPC2 PE=1 SV=1	36913	Carbamidomethylation; Oxidation (M)	99.2	330.8	49	40	34	25	46	42	29	46	41	46	43	46	19	1	63	55	48	64	60	50	70	55	77	57	66
1143.9	953.6	1115.8	1147	1004.8	514.08	1562.4	970.63	1425.8	1308	1630	A0A7G2FLA8	(thale cress) hypothetical protein OS=Arabidopsis thaliana OX=3702 GN=AT9943_LOCUS22885 PE=3 SV=1	105713	Carbamidomethylation; Oxidation (M)	99.2	310.08	17	12	10	12	13	11	7	16	17	16	13	15	14	3	56	46	62	63	60	43	61	57	76	70	70
1143.9	953.6	1115.8	1147	1004.8	514.08	1562.4	970.63	1425.8	1308	1630	A0A7G2FJ31	Tubulin beta chain OS=Arabidopsis thaliana OX=3702 GN=AT9943_LOCUS22884 PE=3 SV=1	50300	Carbamidomethylation; Oxidation (M)	99.2	310.08	36	26	22	26	28	23	16	34	36	34	28	31	14	3	56	46	62	63	60	43	61	57	76	70	70
1143.9	953.6	1115.8	1147	1004.8	514.08	1562.4	970.63	1425.8	1308	1630	A0A178UP81	Tubulin beta chain OS=Arabidopsis thaliana OX=3702 GN=AXX17_At5g62230 PE=3 SV=1	50734	Carbamidomethylation; Oxidation (M)	99.2	310.08	36	26	21	26	28	23	15	34	36	34	27	31	14	3	56	46	62	63	60	43	61	57	76	70	70
1143.9	953.6	1115.8	1147	1004.8	514.08	1562.4	970.63	1425.8	1308	1630	Q56YW9	Tubulin beta-2 chain OS=Arabidopsis thaliana OX=3702 GN=TUBB2 PE=2 SV=2	50734	Carbamidomethylation; Oxidation (M)	99.2	310.08	36	26	21	26	28	23	15	34	36	34	27	31	14	3	56	46	62	63	60	43	61	57	76	70	70
1143.9	953.6	1115.8	1147	1004.8	514.08	1562.4	970.63	1425.8	1308	1630	Q9ASR0	Tubulin beta-3 chain OS=Arabidopsis thaliana OX=3702 GN=TUBB3 PE=2 SV=2	50734	Carbamidomethylation; Oxidation (M)	99.2	310.08	36	26	21	26	28	23	15	34	36	34	27	31	14	3	56	46	62	63	60	43	61	57	76	70	70
4532.1	2513	1734.8	3352.6	3266.9	2593.7	3020.2	3461.9	6050	3944.4	3935	P50318	Phosphoglycerate kinase 2 chloroplastic OS=Arabidopsis thaliana OX=3702 GN=At1g56190 PE=1 SV=3	49939	Oxidation (M)	99.2	330.22	31	22	22	24	22	22	22	29	26	27	22	22	13	5	56	49	52	56	50	58	72	66	78	66	56
4532.1	2513	1734.8	3352.6	3266.9	2593.7	3020.2	3461.9	6050	3944.4	3935	A0A178W4Q1	Phosphoglycerate kinase OS=Arabidopsis thaliana OX=3702 GN=AXX17_At1g50870 PE=3 SV=1	49939	Oxidation (M)	99.2	330.22	31	22	22	24	22	22	22	29	26	27	22	22	13	5	56	49	52	56	50	58	72	66	78	66	56
4532.1	2513	1734.8	3352.6	3266.9	2593.7	3020.2	3461.9	6050	3944.4	3935	F4I3L1	Phosphoglycerate kinase OS=Arabidopsis thaliana OX=3702 GN=At1g56190 PE=1 SV=1	42615	Oxidation (M)	99.2	330.22	37	26	26	28	26	26	26	34	31	32	26	26	13	5	56	49	52	56	50	58	72	66	78	66	56
15804	10564	13958	15708	12134	7896.9	14523	14376	17174	13755	18912	Q9LR30	Glutamate--glyoxylate aminotransferase 1 OS=Arabidopsis thaliana OX=3702 GN=GGAT1 PE=1 SV=1	53301	Carbamidomethylation; Oxidation (M)	99.2	357.93	40	31	16	18	29	28	16	35	39	36	31	26	19	13	66	30	45	66	51	42	64	60	97	71	67
15804	10564	13958	15708	12134	7896.9	14523	14376	17174	13755	18912	A0A178WG36	alanine transaminase OS=Arabidopsis thaliana OX=3702 GN=AXX17_At1g24520 PE=3 SV=1	53301	Carbamidomethylation; Oxidation (M)	99.2	357.93	40	31	16	18	29	28	16	35	39	36	31	26	19	13	66	30	45	66	51	42	64	60	97	71	67
50733	37344	42129	46681	42048	38829	42667	43663	48837	42487	55444	Q9XF89	Chlorophyll a-b binding protein CP26 chloroplastic OS=Arabidopsis thaliana OX=3702 GN=LHCB5 PE=1 SV=1	30157	Carbamidomethylation	99.2	280.75	30	30	20	28	28	28	20	28	28	28	28	28	9	9	60	41	54	57	69	48	55	56	70	59	82
50733	37344	42129	46681	42048	38829	42667	43663	48837	42487	55444	A0A178UW55	Chlorophyll a-b binding protein chloroplastic OS=Arabidopsis thaliana OX=3702 GN=AXX17_At4g11600 PE=3 SV=1	30157	Carbamidomethylation	99.2	280.75	30	30	20	28	28	28	20	28	28	28	28	28	9	9	60	41	54	57	69	48	55	56	70	59	82
0	896.58	634.54	690.5	694.41	691.36	578.38	513.71	121.6	531.69	110.9	P25858	Glyceraldehyde-3-phosphate dehydrogenase GAPC1 cytosolic OS=Arabidopsis thaliana OX=3702 GN=GAPC1 PE=1 SV=2	36914	Carbamidomethylation; Oxidation (M)	99.2	333.2	49	40	34	25	49	42	29	46	41	47	43	46	20	2	58	52	43	61	60	51	67	52	72	58	63
0	896.58	634.54	690.5	694.41	691.36	578.38	513.71	121.6	531.69	110.9	A0A654F3Y9	Glyceraldehyde-3-phosphate dehydrogenase OS=Arabidopsis thaliana OX=3702 GN=AN1_LOCUS11698 PE=3 SV=1	36914	Carbamidomethylation; Oxidation (M)	99.2	333.2	49	40	34	25	49	42	29	46	41	47	43	46	20	2	58	52	43	61	60	51	67	52	72	58	63
2744.4	1374.4	2362.7	3480.7	1950.6	372.85	3887.5	4020.2	5355.9	3815.2	3386.6	A0A5S9XVD2	Stromal 70 kDa heat shock-related protein chloroplastic OS=Arabidopsis thaliana OX=3702 GN=C24_LOCUS19069 PE=3 SV=1	76607	Carbamidomethylation; Oxidation (M)	99.2	350.45	31	25	19	21	26	20	20	30	25	29	26	25	25	9	62	38	48	72	52	48	64	55	78	54	66
2744.4	1374.4	2362.7	3480.7	1950.6	372.85	3887.5	4020.2	5355.9	3815.2	3386.6	A0A178V345	(thale cress) hypothetical protein OS=Arabidopsis thaliana OX=3702 GN=AXX17_At4g28150 PE=3 SV=1	76508	Carbamidomethylation; Oxidation (M)	99.2	350.45	31	25	19	21	26	20	20	30	25	29	26	25	25	9	62	38	48	72	52	48	64	55	78	54	66
2744.4	1374.4	2362.7	3480.7	1950.6	372.85	3887.5	4020.2	5355.9	3815.2	3386.6	Q9STW6	Heat shock 70 kDa protein 6 chloroplastic OS=Arabidopsis thaliana OX=3702 GN=HSP70-6 PE=1 SV=1	76508	Carbamidomethylation; Oxidation (M)	99.2	350.45	31	25	19	21	26	20	20	30	25	29	26	25	25	9	62	38	48	72	52	48	64	55	78	54	66
26778	10157	18066	31494	20446	10049	26240	33356	40257	23221	31128	A0A5S9WGW9	Photosystem I reaction center subunit III OS=Arabidopsis thaliana OX=3702 GN=C24_LOCUS3097 PE=3 SV=1	24173		99.1	267.04	31	26	25	26	26	26	25	26	31	26	26	26	7	7	55	36	41	63	47	40	62	78	88	56	65
26778	10157	18066	31494	20446	10049	26240	33356	40257	23221	31128	A0A178WB32	Photosystem I reaction center subunit III OS=Arabidopsis thaliana OX=3702 GN=AXX17_At1g31980 PE=3 SV=1	24173		99.1	267.04	31	26	25	26	26	26	25	26	31	26	26	26	7	7	55	36	41	63	47	40	62	78	88	56	65
26778	10157	18066	31494	20446	10049	26240	33356	40257	23221	31128	Q9SHE8	Photosystem I reaction center subunit III chloroplastic OS=Arabidopsis thaliana OX=3702 GN=PSAF PE=1 SV=1	24173		99.1	267.04	31	26	25	26	26	26	25	26	31	26	26	26	7	7	55	36	41	63	47	40	62	78	88	56	65
2719.8	1758.9	2304.5	3160.7	1951.9	884.79	3539.5	3174.3	4639.6	3124.2	3315.4	A0A178UDJ5	(thale cress) hypothetical protein OS=Arabidopsis thaliana OX=3702 GN=AXX17_At5g48750 PE=3 SV=1	76939	Carbamidomethylation; Oxidation (M)	99.2	335.11	28	25	18	20	23	19	18	27	24	27	23	23	23	7	62	44	51	65	49	48	65	57	61	55	68
2719.8	1758.9	2304.5	3160.7	1951.9	884.79	3539.5	3174.3	4639.6	3124.2	3315.4	A0A5S9YDR0	Stromal 70 kDa heat shock-related protein chloroplastic OS=Arabidopsis thaliana OX=3702 GN=C24_LOCUS25066 PE=3 SV=1	76925	Carbamidomethylation; Oxidation (M)	99.2	335.11	28	25	18	20	23	19	18	27	24	27	23	23	23	7	62	44	51	65	49	48	65	57	61	55	68
2719.8	1758.9	2304.5	3160.7	1951.9	884.79	3539.5	3174.3	4639.6	3124.2	3315.4	Q9LTX9	Heat shock 70 kDa protein 7 chloroplastic OS=Arabidopsis thaliana OX=3702 GN=HSP70-7 PE=2 SV=1	76997	Carbamidomethylation; Oxidation (M)	99.2	335.11	28	25	18	20	23	19	18	27	24	27	23	23	23	7	62	44	51	65	49	48	65	57	61	55	68
12776	10301	12708	17385	13612	9493.8	12348	12094	16188	16941	20548	A0A178VYW3	(thale cress) hypothetical protein OS=Arabidopsis thaliana OX=3702 GN=AXX17_At2g44840 PE=3 SV=1	17812	Carbamidomethylation	98.8	210.11	30	14	14	20	24	14	20	30	14	30	20	14	5	5	49	46	50	61	60	47	58	49	64	58	74
12776	10301	12708	17385	13612	9493.8	12348	12094	16188	16941	20548	P59233	Ubiquitin-40S ribosomal protein S27a-3 OS=Arabidopsis thaliana OX=3702 GN=RPS27AC PE=2 SV=2	17797	Carbamidomethylation	98.8	210.11	30	14	14	20	24	14	20	30	14	30	20	14	5	5	49	46	50	61	60	47	58	49	64	58	74
12776	10301	12708	17385	13612	9493.8	12348	12094	16188	16941	20548	A0A178V9X1	(thale cress) hypothetical protein OS=Arabidopsis thaliana OX=3702 GN=AXX17_At3g56540 PE=3 SV=1	17797	Carbamidomethylation	98.8	210.11	30	14	14	20	24	14	20	30	14	30	20	14	5	5	49	46	50	61	60	47	58	49	64	58	74
12776	10301	12708	17385	13612	9493.8	12348	12094	16188	16941	20548	P59232	Ubiquitin-40S ribosomal protein S27a-2 OS=Arabidopsis thaliana OX=3702 GN=RPS27AB PE=2 SV=2	17812	Carbamidomethylation	98.8	210.11	30	14	14	20	24	14	20	30	14	30	20	14	5	5	49	46	50	61	60	47	58	49	64	58	74
		0									A0A654EKE8	Heat shock protein 70 family OS=Arabidopsis thaliana OX=3702 GN=AN1_LOCUS4787 PE=3 SV=1	68416	Oxidation (M)	99.2	331.03	24	16	13	15	22	18	16	16	16	17	18	16	16	1	52	35	43	90	54	47	38	43	64	67	82
		0									A0A5S9WMW9	Heat shock protein 70 family OS=Arabidopsis thaliana OX=3702 GN=C24_LOCUS4673 PE=3 SV=1	68357	Oxidation (M)	99.2	331.03	24	16	13	15	22	18	16	16	16	17	18	16	16	1	52	35	43	90	54	47	38	43	64	67	82
		0									Q9C7X7	Heat shock 70 kDa protein 18 OS=Arabidopsis thaliana OX=3702 GN=HSP70-18 PE=2 SV=1	68357	Oxidation (M)	99.2	331.03	24	16	13	15	22	18	16	16	16	17	18	16	16	1	52	35	43	90	54	47	38	43	64	67	82
		0									A0A7G2E4E1	(thale cress) hypothetical protein OS=Arabidopsis thaliana OX=3702 GN=AT9943_LOCUS4077 PE=3 SV=1	68371	Oxidation (M)	99.2	331.03	24	16	13	15	22	18	16	16	16	17	18	16	16	1	52	35	43	90	54	47	38	43	64	67	82
		0									A0A178W0N9	HSP70T-1 OS=Arabidopsis thaliana OX=3702 GN=AXX17_At1g51090 PE=3 SV=1	68343	Oxidation (M)	99.2	331.03	24	16	13	15	22	18	16	16	16	17	18	16	16	1	52	35	43	90	54	47	38	43	64	67	82
13396	10688	12070	13206	8225.7	6770.3	18706	13404	13178	10782	11743	A0A178UYW8	Elongation factor Ts mitochondrial OS=Arabidopsis thaliana OX=3702 GN=EFTS PE=3 SV=1	107873	Carbamidomethylation; Oxidation (M)	99.2	383.46	24	19	19	19	19	18	18	23	19	21	21	18	25	25	60	42	53	61	46	46	64	59	60	55	59
13396	10688	12070	13206	8225.7	6770.3	18706	13404	13178	10782	11743	A0A5S9XWW6	Elongation factor Ts mitochondrial OS=Arabidopsis thaliana OX=3702 GN=EFTS PE=3 SV=1	103752	Carbamidomethylation; Oxidation (M)	99.2	383.46	25	20	19	19	20	18	19	24	19	21	21	19	25	25	60	42	53	61	46	46	64	59	60	55	59
13396	10688	12070	13206	8225.7	6770.3	18706	13404	13178	10782	11743	Q9SZD6	Polyprotein of EF-Ts chloroplastic OS=Arabidopsis thaliana OX=3702 GN=PETs PE=1 SV=1	103782	Carbamidomethylation; Oxidation (M)	99.2	383.46	25	20	19	19	20	18	19	24	19	21	21	19	25	25	60	42	53	61	46	46	64	59	60	55	59
13396	10688	12070	13206	8225.7	6770.3	18706	13404	13178	10782	11743	A0A654FU27	Elongation factor Ts mitochondrial OS=Arabidopsis thaliana OX=3702 GN=EFTS PE=3 SV=1	103798	Carbamidomethylation; Oxidation (M)	99.2	383.46	25	20	19	19	20	18	19	24	19	21	21	19	25	25	60	42	53	61	46	46	64	59	60	55	59
13396	10688	12070	13206	8225.7	6770.3	18706	13404	13178	10782	11743	A0A7G2F1F4	Elongation factor Ts mitochondrial OS=Arabidopsis thaliana OX=3702 GN=EFTS PE=3 SV=1	127590	Carbamidomethylation; Oxidation (M)	99.2	383.46	20	16	16	16	16	15	16	20	16	18	17	15	25	25	60	42	53	61	46	46	64	59	60	55	59
9004.1	18026	24166	27845	8310.2	14981	10594	28614	34204	10391	31394	Q9XF91	Photosystem II 22 kDa protein chloroplastic OS=Arabidopsis thaliana OX=3702 GN=PSBS PE=2 SV=1	28008		99.1	253.31	18	18	18	18	18	18	18	18	18	18	18	18	6	6	60	40	53	55	55	39	59	66	61	53	62
9004.1	18026	24166	27845	8310.2	14981	10594	28614	34204	10391	31394	A0A7G2E1Y9	(thale cress) hypothetical protein OS=Arabidopsis thaliana OX=3702 GN=AT9943_LOCUS3179 PE=4 SV=1	28036		99.1	253.31	18	18	18	18	18	18	18	18	18	18	18	18	6	6	60	40	53	55	55	39	59	66	61	53	62
9004.1	18026	24166	27845	8310.2	14981	10594	28614	34204	10391	31394	A0A178WCN8	PSBS OS=Arabidopsis thaliana OX=3702 GN=AXX17_At1g40380 PE=4 SV=1	28008		99.1	253.31	18	18	18	18	18	18	18	18	18	18	18	18	6	6	60	40	53	55	55	39	59	66	61	53	62
17554	12785	15195	17958	13211	10479	18151	18407	17881	15516	19328	A0A178UBZ3	CaS OS=Arabidopsis thaliana OX=3702 GN=AXX17_At5g22580 PE=4 SV=1	41230	Carbamidomethylation; Oxidation (M)	99.2	365.67	37	35	28	26	35	29	23	33	32	37	35	37	15	15	56	38	49	69	47	40	59	59	64	60	58
17554	12785	15195	17958	13211	10479	18151	18407	17881	15516	19328	A0A654G3C2	Rhodanese domain-containing protein OS=Arabidopsis thaliana OX=3702 GN=AN1_LOCUS23044 PE=4 SV=1	41285	Carbamidomethylation; Oxidation (M)	99.2	365.67	37	35	28	26	35	29	23	33	32	37	35	37	15	15	56	38	49	69	47	40	59	59	64	60	58
17554	12785	15195	17958	13211	10479	18151	18407	17881	15516	19328	Q9FN48	Calcium sensing receptor chloroplastic OS=Arabidopsis thaliana OX=3702 GN=CAS PE=1 SV=1	41285	Carbamidomethylation; Oxidation (M)	99.2	365.67	37	35	28	26	35	29	23	33	32	37	35	37	15	15	56	38	49	69	47	40	59	59	64	60	58
2223.9	919.53	1481.8	1077.4	1426	691.12	2478.3	953.38	1772	1036.3	1876.8	A0A178VKB3	5-methyltetrahydropteroyltriglutamate--homocysteine S-methyltransferase OS=Arabidopsis thaliana OX=3702 GN=AXX17_At3g03170 PE=3 SV=1	84584	Oxidation (M); Acetylation (N-term)	99.2	337.17	21	19	14	21	20	18	14	18	19	20	19	20	19	8	56	45	58	61	48	39	67	54	63	51	53
2223.9	919.53	1481.8	1077.4	1426	691.12	2478.3	953.38	1772	1036.3	1876.8	Q9SRV5	5-methyltetrahydropteroyltriglutamate--homocysteine methyltransferase 2 OS=Arabidopsis thaliana OX=3702 GN=MS2 PE=1 SV=1	84584	Oxidation (M); Acetylation (N-term)	99.2	337.17	21	19	14	21	20	18	14	18	19	20	19	20	19	8	56	45	58	61	48	39	67	54	63	51	53
18798	13604	16229	13553	11390	8778.5	14911	16657	15415	12979	14388	A0A178UTF1	Glycine cleavage system P protein OS=Arabidopsis thaliana OX=3702 GN=AXX17_At4g37830 PE=3 SV=1	112925	Carbamidomethylation; Oxidation (M)	99.2	331.38	14	11	11	11	11	9	9	11	10	13	12	12	19	9	63	43	58	61	43	47	51	57	61	55	53
18798	13604	16229	13553	11390	8778.5	14911	16657	15415	12979	14388	Q94B78	Glycine dehydrogenase (decarboxylating) 1 mitochondrial OS=Arabidopsis thaliana OX=3702 GN=GLDP1 PE=1 SV=2	112925	Carbamidomethylation; Oxidation (M)	99.2	331.38	14	11	11	11	11	9	9	11	10	13	12	12	19	9	63	43	58	61	43	47	51	57	61	55	53
18798	13604	16229	13553	11390	8778.5	14911	16657	15415	12979	14388	A0A7G2F5N5	Glycine cleavage system P protein OS=Arabidopsis thaliana OX=3702 GN=AT9943_LOCUS17368 PE=3 SV=1	112951	Carbamidomethylation; Oxidation (M)	99.2	331.38	14	11	11	11	11	9	9	11	10	13	12	12	19	9	63	43	58	61	43	47	51	57	61	55	53
	740.49	1305.6	757.03	849.39		968.91	174.85	1172.6	823.54	1415.5	A0A178UEW4	(thale cress) hypothetical protein OS=Arabidopsis thaliana OX=3702 GN=AXX17_At5g09370 PE=3 SV=1	41736	Carbamidomethylation; Oxidation (M); Acetylation (N-term)	99.2	305.61	38	31	23	32	37	33	22	38	31	38	37	38	15	2	54	35	46	67	53	44	56	41	64	52	72
	740.49	1305.6	757.03	849.39		968.91	174.85	1172.6	823.54	1415.5	P53492	Actin-7 OS=Arabidopsis thaliana OX=3702 GN=ACT7 PE=1 SV=1	41736	Carbamidomethylation; Oxidation (M); Acetylation (N-term)	99.2	305.61	38	31	23	32	37	33	22	38	31	38	37	38	15	2	54	35	46	67	53	44	56	41	64	52	72
7500.2	4015.8	7318.3	11254	6239.8	2810.8	9527.5	8615.3	11756	7694.6	10217	A0A7G2FG94	Glutamine synthetase OS=Arabidopsis thaliana OX=3702 GN=AT9943_LOCUS20542 PE=3 SV=1	79147	Oxidation (M)	99.2	251.14	10	7	4	5	8	10	4	10	7	10	8	8	9	6	50	40	47	62	50	39	49	48	68	58	66
7500.2	4015.8	7318.3	11254	6239.8	2810.8	9527.5	8615.3	11756	7694.6	10217	A0A384L697	Glutamine synthetase OS=Arabidopsis thaliana OX=3702 GN=AXX17_At5g32810 PE=3 SV=1	47411	Oxidation (M)	99.2	251.14	16	11	7	9	13	16	7	16	12	16	13	13	9	6	50	40	47	62	50	39	49	48	68	58	66
7500.2	4015.8	7318.3	11254	6239.8	2810.8	9527.5	8615.3	11756	7694.6	10217	Q43127	Glutamine synthetase chloroplastic/mitochondrial OS=Arabidopsis thaliana OX=3702 GN=GLN2 PE=1 SV=1	47411	Oxidation (M)	99.2	251.14	16	11	7	9	13	16	7	16	12	16	13	13	9	6	50	40	47	62	50	39	49	48	68	58	66
7500.2	4015.8	7318.3	11254	6239.8	2810.8	9527.5	8615.3	11756	7694.6	10217	B9DGD1	Glutamine synthetase OS=Arabidopsis thaliana OX=3702 GN=At5g35630 PE=2 SV=1	47411	Oxidation (M)	99.2	251.14	16	11	7	9	13	16	7	16	12	16	13	13	9	6	50	40	47	62	50	39	49	48	68	58	66
2003.6	1172.5	1861.2	1513.4	1151.7	727	2110.8	2243.8	1902	1988.9	1750.8	A0A8F5Z876	Photosystem II CP47 reaction center protein OS=Arabidopsis thaliana OX=3702 GN=psbB PE=3 SV=1	56115	Oxidation (M)	99.2	268.45	15	12	10	12	15	12	12	12	15	15	13	12	8	3	56	39	53	61	37	30	62	67	61	59	52
4252.6	2575.3	3727.7	3792.4	2587.1	1109.1	4075.6	4239.9	4277.4	4617.8	4559.7	P38418	Lipoxygenase 2 chloroplastic OS=Arabidopsis thaliana OX=3702 GN=LOX2 PE=1 SV=1	102046	Carbamidomethylation; Oxidation (M)	99.2	327.05	20	17	13	16	18	16	9	18	16	19	16	16	20	5	60	38	53	57	36	25	61	63	65	64	54
19907	11790	15533	16768	15127	8405.9	19818	17056	20943	18124	19315	Q9FKW6	Ferredoxin--NADP reductase leaf isozyme 1 chloroplastic OS=Arabidopsis thaliana OX=3702 GN=LFNR1 PE=1 SV=1	40327	Carbamidomethylation; Oxidation (M)	99.2	334.52	49	34	30	30	34	34	29	39	39	44	33	36	18	13	64	40	43	56	47	46	59	46	63	49	52
19907	11790	15533	16768	15127	8405.9	19818	17056	20943	18124	19315	A0A654GFN6	Ferredoxin--NADP reductase chloroplastic OS=Arabidopsis thaliana OX=3702 GN=AN1_LOCUS26952 PE=3 SV=1	40327	Carbamidomethylation; Oxidation (M)	99.2	334.52	49	34	30	30	34	34	29	39	39	44	33	36	18	13	64	40	43	56	47	46	59	46	63	49	52
19907	11790	15533	16768	15127	8405.9	19818	17056	20943	18124	19315	A0A178UAK1	Ferredoxin--NADP reductase chloroplastic OS=Arabidopsis thaliana OX=3702 GN=AXX17_At5g66120 PE=3 SV=1	40310	Carbamidomethylation; Oxidation (M)	99.2	334.52	49	34	30	30	34	34	29	39	39	44	33	36	18	13	64	40	43	56	47	46	59	46	63	49	52
19907	11790	15533	16768	15127	8405.9	19818	17056	20943	18124	19315	A0A7G2FN41	Ferredoxin--NADP reductase chloroplastic OS=Arabidopsis thaliana OX=3702 GN=AT9943_LOCUS23207 PE=3 SV=1	39113	Carbamidomethylation; Oxidation (M)	99.2	334.52	50	35	31	31	35	35	29	40	40	45	34	37	18	13	64	40	43	56	47	46	59	46	63	49	52
23027	15880	19753	20203	17157	12551	21769	19443	25312	23311	24484	A0A654ELZ9	Glycerate dehydrogenase HPR peroxisomal OS=Arabidopsis thaliana OX=3702 GN=AN1_LOCUS5819 PE=3 SV=1	42278	Carbamidomethylation; Oxidation (M); Acetylation (N-term)	99.2	335.37	44	39	33	39	41	33	33	39	38	44	36	41	15	15	52	45	42	58	43	33	60	57	59	59	53
23027	15880	19753	20203	17157	12551	21769	19443	25312	23311	24484	A0A178WM81	HPR OS=Arabidopsis thaliana OX=3702 GN=AXX17_At1g62030 PE=3 SV=1	42248	Carbamidomethylation; Oxidation (M); Acetylation (N-term)	99.2	335.37	44	39	33	39	41	33	33	39	38	44	36	41	15	15	52	45	42	58	43	33	60	57	59	59	53
23027	15880	19753	20203	17157	12551	21769	19443	25312	23311	24484	Q9C9W5	Glycerate dehydrogenase HPR peroxisomal OS=Arabidopsis thaliana OX=3702 GN=HPR PE=1 SV=1	42248	Carbamidomethylation; Oxidation (M); Acetylation (N-term)	99.2	335.37	44	39	33	39	41	33	33	39	38	44	36	41	15	15	52	45	42	58	43	33	60	57	59	59	53
13458	9919.6	12522	8015.8	6350.2	9497.3	11901	13094	12032	8552.1	10574	Q8W493	Ferredoxin--NADP reductase leaf isozyme 2 chloroplastic OS=Arabidopsis thaliana OX=3702 GN=LFNR2 PE=1 SV=1	41168	Carbamidomethylation; Oxidation (M)	99.2	323.83	38	29	25	21	29	23	19	30	34	34	26	29	16	11	62	47	51	47	40	41	57	56	57	48	52
13458	9919.6	12522	8015.8	6350.2	9497.3	11901	13094	12032	8552.1	10574	A0A178WE91	Ferredoxin--NADP reductase chloroplastic OS=Arabidopsis thaliana OX=3702 GN=AXX17_At1g21000 PE=3 SV=1	41168	Carbamidomethylation; Oxidation (M)	99.2	323.83	38	29	25	21	29	23	19	30	34	34	26	29	16	11	62	47	51	47	40	41	57	56	57	48	52
12824	6376.5	8141.1	9438.1	8881.6	6597.2	11669	9283.3	12429	10202	13225	Q96262	Plasma membrane-associated cation-binding protein 1 OS=Arabidopsis thaliana OX=3702 GN=PCAP1 PE=1 SV=1	24584		99.2	284.5	51	34	30	26	48	34	28	36	42	48	41	36	12	12	50	40	44	45	55	41	56	48	69	42	59
			20335	5305.6	5192.6			3790.6	11213	13746	A0A5S9UPW5	Heat shock protein 70 family OS=Arabidopsis thaliana OX=3702 GN=C24_LOCUS1654 PE=3 SV=1	70943	Carbamidomethylation; Oxidation (M)	99.2	370.97	43	7	5	5	41	24	22	7	7	24	31	33	27	20	21	9	9	130	49	41	13	23	53	81	110
			20335	5305.6	5192.6			3790.6	11213	13746	A0A178W9N7	(thale cress) hypothetical protein OS=Arabidopsis thaliana OX=3702 GN=AXX17_At1g16810 PE=3 SV=1	70915	Carbamidomethylation; Oxidation (M)	99.2	370.97	43	7	5	5	41	24	22	7	7	24	31	33	27	20	21	9	9	130	49	41	13	23	53	81	110
			20335	5305.6	5192.6			3790.6	11213	13746	Q9S9N1	Heat shock 70 kDa protein 5 OS=Arabidopsis thaliana OX=3702 GN=HSP70-5 PE=2 SV=1	70915	Carbamidomethylation; Oxidation (M)	99.2	370.97	43	7	5	5	41	24	22	7	7	24	31	33	27	20	21	9	9	130	49	41	13	23	53	81	110
8366.6	5268.7	6678.9	8694.9	6114.7	4620.8	8748.5	8309.5	11063	8894	9578	P83483	ATP synthase subunit beta-1 mitochondrial OS=Arabidopsis thaliana OX=3702 GN=At5g08670 PE=1 SV=1	59671	Carbamidomethylation; Oxidation (M)	99.2	336.99	34	30	20	26	26	25	22	30	32	34	30	26	15	14	48	35	47	61	41	35	52	48	71	54	46
8366.6	5268.7	6678.9	8694.9	6114.7	4620.8	8748.5	8309.5	11063	8894	9578	A0A654FZJ9	ATP synthase subunit beta OS=Arabidopsis thaliana OX=3702 GN=AN1_LOCUS21698 PE=3 SV=1	59671	Carbamidomethylation; Oxidation (M)	99.2	336.99	34	30	20	26	26	25	22	30	32	34	30	26	15	14	48	35	47	61	41	35	52	48	71	54	46
8366.6	5268.7	6678.9	8694.9	6114.7	4620.8	8748.5	8309.5	11063	8894	9578	Q8H135	ATP synthase subunit beta (Fragment) OS=Arabidopsis thaliana OX=3702 GN=At5g08670 PE=2 SV=1	48257	Carbamidomethylation; Oxidation (M)	99.2	336.99	43	37	25	32	32	31	27	37	40	43	37	32	15	14	48	35	47	61	41	35	52	48	71	54	46
8366.6	5268.7	6678.9	8694.9	6114.7	4620.8	8748.5	8309.5	11063	8894	9578	P83484	ATP synthase subunit beta-2 mitochondrial OS=Arabidopsis thaliana OX=3702 GN=At5g08690 PE=1 SV=1	59713	Carbamidomethylation; Oxidation (M)	99.2	336.99	34	30	20	26	26	25	22	30	32	34	30	26	15	14	48	35	47	61	41	35	52	48	71	54	46
8366.6	5268.7	6678.9	8694.9	6114.7	4620.8	8748.5	8309.5	11063	8894	9578	A0A178UQU4	ATP synthase subunit beta OS=Arabidopsis thaliana OX=3702 GN=AXX17_At5g08610 PE=3 SV=1	59713	Carbamidomethylation; Oxidation (M)	99.2	336.99	34	30	20	26	26	25	22	30	32	34	30	26	15	14	48	35	47	61	41	35	52	48	71	54	46
8366.6	5268.7	6678.9	8694.9	6114.7	4620.8	8748.5	8309.5	11063	8894	9578	Q9C5A9	ATP synthase subunit beta-3 mitochondrial OS=Arabidopsis thaliana OX=3702 GN=At5g08680 PE=1 SV=1	59859	Carbamidomethylation; Oxidation (M)	99.2	336.99	34	30	20	26	26	25	22	30	32	34	30	26	15	14	48	35	47	61	41	35	52	48	71	54	46
8366.6	5268.7	6678.9	8694.9	6114.7	4620.8	8748.5	8309.5	11063	8894	9578	A0A178UFZ5	ATP synthase subunit beta OS=Arabidopsis thaliana OX=3702 GN=AXX17_At5g08600 PE=3 SV=1	59958	Carbamidomethylation; Oxidation (M)	99.2	336.99	34	30	20	26	26	25	22	30	32	34	30	26	15	14	48	35	47	61	41	35	52	48	71	54	46
11780	6588.1	10130	11091	8516.8	4108.8	11394	12811	13967	12120	13885	Q0WLF6	V-type proton ATPase catalytic subunit A OS=Arabidopsis thaliana OX=3702 GN=At1g78900 PE=2 SV=1	68813	Carbamidomethylation; Oxidation (M)	99.2	367.41	28	27	22	26	27	25	17	27	27	26	27	28	14	14	53	37	45	47	43	30	60	51	55	53	62
11780	6588.1	10130	11091	8516.8	4108.8	11394	12811	13967	12120	13885	A0A384LM33	V-type proton ATPase catalytic subunit A OS=Arabidopsis thaliana OX=3702 GN=AXX17_At1g73590 PE=3 SV=1	68813	Carbamidomethylation; Oxidation (M)	99.2	367.41	28	27	22	26	27	25	17	27	27	26	27	28	14	14	53	37	45	47	43	30	60	51	55	53	62
11780	6588.1	10130	11091	8516.8	4108.8	11394	12811	13967	12120	13885	O23654	V-type proton ATPase catalytic subunit A OS=Arabidopsis thaliana OX=3702 GN=VHA-A PE=1 SV=1	68813	Carbamidomethylation; Oxidation (M)	99.2	367.41	28	27	22	26	27	25	17	27	27	26	27	28	14	14	53	37	45	47	43	30	60	51	55	53	62
20617	7248.8	15668	22454	13960	7110.4	17676	21948	25748	19219	21370	P56759	ATP synthase subunit b chloroplastic OS=Arabidopsis thaliana OX=3702 GN=atpF PE=3 SV=1	21057	Oxidation (M)	99.1	269.55	43	37	37	37	40	37	32	37	43	40	37	37	11	9	56	35	40	56	44	31	43	54	66	47	61
20617	7248.8	15668	22454	13960	7110.4	17676	21948	25748	19219	21370	A0A514YJ21	ATP synthase subunit b chloroplastic OS=Arabidopsis thaliana OX=3702 GN=atpF PE=3 SV=1	21057	Oxidation (M)	99.1	269.55	43	37	37	37	40	37	32	37	43	40	37	37	11	9	56	35	40	56	44	31	43	54	66	47	61
0			17.292	0			0	15.834	23.124		Q96293	Actin-8 OS=Arabidopsis thaliana OX=3702 GN=ACT8 PE=1 SV=2	41863	Carbamidomethylation; Oxidation (M); Acetylation (N-term)	99.2	316.55	40	32	21	25	32	33	19	28	33	40	34	28	15	1	55	33	42	56	47	42	46	41	61	50	58
0			17.292	0			0	15.834	23.124		A0A178WDV5	(thale cress) hypothetical protein OS=Arabidopsis thaliana OX=3702 GN=AXX17_At1g43400 PE=3 SV=1	41863	Carbamidomethylation; Oxidation (M); Acetylation (N-term)	99.2	316.55	40	32	21	25	32	33	19	28	33	40	34	28	15	1	55	33	42	56	47	42	46	41	61	50	58
24544	11973	19775	24959	20947		20768	23803	24937	21428	24621	A0A8F5P3R8	Photosystem II CP47 reaction center protein OS=Arabidopsis thaliana OX=3702 GN=psbB PE=3 SV=1	55977	Oxidation (M)	99.1	238.35	13	10	8	10	13	10	9	10	13	13	10	10	6	1	50	37	54	59	39	23	54	57	57	53	48
2613.2	1320.9	1960.9	2393.8	1808.3	1110.2	2486.8	2355.9	2829.5	2512.2	2498.4	A0A7G2DRV7	Tubulin beta chain OS=Arabidopsis thaliana OX=3702 GN=AT9943_LOCUS1733 PE=3 SV=1	47857	Carbamidomethylation; Oxidation (M)	99.2	285.54	32	23	23	23	27	25	16	30	30	27	23	25	12	4	49	35	48	55	45	28	58	49	55	53	53
2613.2	1320.9	1960.9	2393.8	1808.3	1110.2	2486.8	2355.9	2829.5	2512.2	2498.4	A0A178W9M8	Tubulin beta chain OS=Arabidopsis thaliana OX=3702 GN=AXX17_At1g20990 PE=3 SV=1	50343	Carbamidomethylation; Oxidation (M)	99.2	285.54	30	22	22	22	26	23	16	28	28	26	22	23	12	4	49	35	48	55	45	28	58	49	55	53	53
2613.2	1320.9	1960.9	2393.8	1808.3	1110.2	2486.8	2355.9	2829.5	2512.2	2498.4	P29513	Tubulin beta-5 chain OS=Arabidopsis thaliana OX=3702 GN=TUBB5 PE=2 SV=1	50343	Carbamidomethylation; Oxidation (M)	99.2	285.54	30	22	22	22	26	23	16	28	28	26	22	23	12	4	49	35	48	55	45	28	58	49	55	53	53
9993	6187.2	7125.7	12805	8735.2	5262.7	9597.7	8880.8	12068	13121	15198	Q9SUR0	AT4G23670 protein OS=Arabidopsis thaliana OX=3702 GN=At4g23670 PE=1 SV=1	17518	Carbamidomethylation; Oxidation (M); Acetylation (N-term)	99.1	276.22	54	54	42	49	42	54	42	49	44	49	49	49	11	9	48	39	47	53	49	36	44	45	52	53	56
9993	6187.2	7125.7	12805	8735.2	5262.7	9597.7	8880.8	12068	13121	15198	A0A178URY2	Bet_v_1 domain-containing protein OS=Arabidopsis thaliana OX=3702 GN=At4g23670 PE=4 SV=1	17518	Carbamidomethylation; Oxidation (M); Acetylation (N-term)	99.1	276.22	54	54	42	49	42	54	42	49	44	49	49	49	11	9	48	39	47	53	49	36	44	45	52	53	56
								0	0		Q96292	Actin-2 OS=Arabidopsis thaliana OX=3702 GN=ACT2 PE=1 SV=1	41877	Carbamidomethylation; Oxidation (M); Acetylation (N-term)	99.2	319.39	40	27	21	25	27	28	19	28	28	40	34	28	15	1	53	33	42	54	46	42	46	40	58	49	58
								0	0		A0A384KW03	(thale cress) hypothetical protein OS=Arabidopsis thaliana OX=3702 GN=AXX17_At3g19970 PE=1 SV=1	41877	Carbamidomethylation; Oxidation (M); Acetylation (N-term)	99.2	319.39	40	27	21	25	27	28	19	28	28	40	34	28	15	1	53	33	42	54	46	42	46	40	58	49	58
								0	0		Q0WL95	AT3G18780 protein OS=Arabidopsis thaliana OX=3702 GN=At3g18780 PE=1 SV=1	41877	Carbamidomethylation; Oxidation (M); Acetylation (N-term)	99.2	319.39	40	27	21	25	27	28	19	28	28	40	34	28	15	1	53	33	42	54	46	42	46	40	58	49	58
23501	15696	20427	23212	16596	8688.3	26995	25774	27208	27211	31680	A0A178V7Z2	ESM1 OS=Arabidopsis thaliana OX=3702 GN=AXX17_At3g14780 PE=3 SV=1	44018	Carbamidomethylation; Oxidation (M)	99.1	250.26	30	25	19	12	25	25	15	25	30	30	25	25	8	8	43	37	38	48	35	21	53	56	58	62	70
23501	15696	20427	23212	16596	8688.3	26995	25774	27208	27211	31680	Q9LJG3	GDSL esterase/lipase ESM1 OS=Arabidopsis thaliana OX=3702 GN=ESM1 PE=1 SV=1	44060	Carbamidomethylation; Oxidation (M)	99.1	250.26	30	25	19	12	25	25	15	25	30	30	25	25	8	8	43	37	38	48	35	21	53	56	58	62	70
26565	16357	19296	28997	21367	12780	25024	21598	26663	24118	33389	A0A8F5V8L5	Photosystem I iron-sulfur center OS=Arabidopsis thaliana OX=3702 GN=psaC PE=3 SV=1	9038	Carbamidomethylation; Oxidation (M)	99.1	291.77	85	74	72	72	83	74	72	72	72	72	72	74	8	8	47	39	45	52	48	46	48	45	52	46	51
26565	16357	19296	28997	21367	12780	25024	21598	26663	24118	33389	P62090	Photosystem I iron-sulfur center OS=Arabidopsis thaliana OX=3702 GN=psaC PE=1 SV=2	9038	Carbamidomethylation; Oxidation (M)	99.1	291.77	85	74	72	72	83	74	72	72	72	72	72	74	8	8	47	39	45	52	48	46	48	45	52	46	51
26565	16357	19296	28997	21367	12780	25024	21598	26663	24118	33389	A0A1B1W4Y4	Photosystem I iron-sulfur center OS=Arabidopsis thaliana OX=3702 GN=psaC PE=3 SV=1	9038	Carbamidomethylation; Oxidation (M)	99.1	291.77	85	74	72	72	83	74	72	72	72	72	72	74	8	8	47	39	45	52	48	46	48	45	52	46	51
6509.4	4081.3	5785.9	5484.8	4350.2	3395.5	6224.8	5582.8	6856	4902.1	6526.6	A0A7G2EJX0	phosphoenolpyruvate carboxylase OS=Arabidopsis thaliana OX=3702 GN=AT9943_LOCUS9249 PE=3 SV=1	138766	Carbamidomethylation; Oxidation (M)	99.2	346.27	22	15	12	15	14	13	11	16	15	19	14	16	28	17	52	35	55	50	41	33	49	40	72	42	49
40096	36733	43000	43754	39005	33734	39795	45665	47753	45849	47345	A0A1B1W4T6	Photosystem I P700 chlorophyll a apoprotein A1 OS=Arabidopsis thaliana OX=3702 GN=psaA PE=3 SV=1	83231	Carbamidomethylation	99.2	203.56	10	8	7	6	10	8	6	6	9	9	6	9	10	10	44	40	42	55	48	48	44	50	50	57	40
40096	36733	43000	43754	39005	33734	39795	45665	47753	45849	47345	P56766	Photosystem I P700 chlorophyll a apoprotein A1 OS=Arabidopsis thaliana OX=3702 GN=psaA PE=1 SV=1	83231	Carbamidomethylation	99.2	203.56	10	8	7	6	10	8	6	6	9	9	6	9	10	10	44	40	42	55	48	48	44	50	50	57	40
13360	6824.5	8819.3	11173	8264.2	8313	10989	11321	12833	10521	12220	Q56WK6	Patellin-1 OS=Arabidopsis thaliana OX=3702 GN=PATL1 PE=1 SV=2	64046	Oxidation (M)	99.2	325.73	34	32	19	26	26	21	21	23	28	28	27	25	23	22	63	27	47	47	44	35	46	50	51	44	49
23635	12347	20553	26101	15825	8717	30305	24351	35248	24007	26761	Q8LBJ7	50S ribosomal protein L12-C OS=Arabidopsis thaliana OX=3702 PE=2 SV=1	19682		99.1	252.14	34	28	32	32	32	32	32	33	28	34	32	32	9	9	43	25	47	54	36	24	57	49	61	45	55
23635	12347	20553	26101	15825	8717	30305	24351	35248	24007	26761	A0A5S9XGA9	(thale cress) hypothetical protein OS=Arabidopsis thaliana OX=3702 GN=AN1_LOCUS14291 PE=3 SV=1	19682		99.1	252.14	34	28	32	32	32	32	32	33	28	34	32	32	9	9	43	25	47	54	36	24	57	49	61	45	55
23635	12347	20553	26101	15825	8717	30305	24351	35248	24007	26761	A0A178V6Q1	RPL12-C OS=Arabidopsis thaliana OX=3702 GN=AXX17_At3g30350 PE=3 SV=1	19699		99.1	252.14	34	28	32	32	32	32	32	33	28	34	32	32	9	9	43	25	47	54	36	24	57	49	61	45	55
23635	12347	20553	26101	15825	8717	30305	24351	35248	24007	26761	P36212	50S ribosomal protein L12-3 chloroplastic OS=Arabidopsis thaliana OX=3702 GN=RPL12C PE=2 SV=2	19682		99.1	252.14	34	28	32	32	32	32	32	33	28	34	32	32	9	9	43	25	47	54	36	24	57	49	61	45	55
23635	12347	20553	26101	15825	8717	30305	24351	35248	24007	26761	A0A178VJ19	(thale cress) hypothetical protein OS=Arabidopsis thaliana OX=3702 GN=AXX17_At3g30330 PE=3 SV=1	20075		99.1	252.14	34	27	31	31	31	31	31	32	27	34	31	31	9	9	43	25	47	54	36	24	57	49	61	45	55
23635	12347	20553	26101	15825	8717	30305	24351	35248	24007	26761	P36210	50S ribosomal protein L12-1 chloroplastic OS=Arabidopsis thaliana OX=3702 GN=RPL12A PE=2 SV=1	20075		99.1	252.14	34	27	31	31	31	31	31	32	27	34	31	31	9	9	43	25	47	54	36	24	57	49	61	45	55
23635	12347	20553	26101	15825	8717	30305	24351	35248	24007	26761	A0A5S9XH20	50S ribosomal protein L12 chloroplastic-like OS=Arabidopsis thaliana OX=3702 GN=C24_LOCUS14126 PE=3 SV=1	20061		99.1	252.14	34	27	31	31	31	31	31	32	27	34	31	31	9	9	43	25	47	54	36	24	57	49	61	45	55
27673	22004	24731	25421	21483	17008	25730	22979	27103	26026	28262	A0A178WFZ3	Aminomethyltransferase OS=Arabidopsis thaliana OX=3702 GN=AXX17_At1g12220 PE=3 SV=1	44445	Carbamidomethylation; Oxidation (M)	99.2	266.36	23	21	21	23	21	23	21	21	21	21	21	21	10	10	49	42	42	45	30	39	53	48	47	54	45
27673	22004	24731	25421	21483	17008	25730	22979	27103	26026	28262	O65396	Aminomethyltransferase mitochondrial OS=Arabidopsis thaliana OX=3702 GN=GDCST PE=2 SV=1	44445	Carbamidomethylation; Oxidation (M)	99.2	266.36	23	21	21	23	21	23	21	21	21	21	21	21	10	10	49	42	42	45	30	39	53	48	47	54	45
27673	22004	24731	25421	21483	17008	25730	22979	27103	26026	28262	A0A2H1ZEA9	Aminomethyltransferase OS=Arabidopsis thaliana OX=3702 GN=At1g11860 PE=1 SV=1	46352	Carbamidomethylation; Oxidation (M)	99.2	266.36	22	21	21	22	21	22	21	21	21	21	21	21	10	10	49	42	42	45	30	39	53	48	47	54	45
10864	8679.1	9999.7	12978	8945.8	5302.7	15152	9533.4	13287	11771	13410	Q9ASR1	Elongation factor 2 OS=Arabidopsis thaliana OX=3702 GN=LOS1 PE=1 SV=1	93891	Carbamidomethylation; Oxidation (M)	99.2	330.3	26	19	14	17	22	19	12	23	19	25	20	18	22	22	49	34	41	55	32	32	50	40	61	49	47
10864	8679.1	9999.7	12978	8945.8	5302.7	15152	9533.4	13287	11771	13410	A0A178WBS0	(thale cress) hypothetical protein OS=Arabidopsis thaliana OX=3702 GN=AXX17_At1g50740 PE=3 SV=1	93891	Carbamidomethylation; Oxidation (M)	99.2	330.3	26	19	14	17	22	19	12	23	19	25	20	18	22	22	49	34	41	55	32	32	50	40	61	49	47
6697.9	2966.9	3802.1	6983.7	4292.5	2504	6651	5771.3	9820.5	7715.4	6905	O82660	Photosystem II stability/assembly factor HCF136 chloroplastic OS=Arabidopsis thaliana OX=3702 GN=HCF136 PE=1 SV=1	44104	Oxidation (M)	99.2	359.07	40	38	34	31	40	35	34	40	38	38	40	39	14	14	47	26	42	54	34	28	50	52	59	54	44
6697.9	2966.9	3802.1	6983.7	4292.5	2504	6651	5771.3	9820.5	7715.4	6905	A0A654G449	Photosystem II stability/assembly factor OS=Arabidopsis thaliana OX=3702 GN=AN1_LOCUS23050 PE=3 SV=1	44104	Oxidation (M)	99.2	359.07	40	38	34	31	40	35	34	40	38	38	40	39	14	14	47	26	42	54	34	28	50	52	59	54	44
6697.9	2966.9	3802.1	6983.7	4292.5	2504	6651	5771.3	9820.5	7715.4	6905	A0A178UP93	Photosystem II stability/assembly factor OS=Arabidopsis thaliana OX=3702 GN=AXX17_At5g22660 PE=3 SV=1	44032	Oxidation (M)	99.2	359.07	40	38	34	31	40	35	34	40	38	38	40	39	14	14	47	26	42	54	34	28	50	52	59	54	44
6697.9	2966.9	3802.1	6983.7	4292.5	2504	6651	5771.3	9820.5	7715.4	6905	A0A5S9Y6J1	Photosystem II stability/assembly factor OS=Arabidopsis thaliana OX=3702 GN=C24_LOCUS22936 PE=3 SV=1	44120	Oxidation (M)	99.2	359.07	40	38	34	31	40	35	34	40	38	38	40	39	14	14	47	26	42	54	34	28	50	52	59	54	44
6697.9	2966.9	3802.1	6983.7	4292.5	2504	6651	5771.3	9820.5	7715.4	6905	A0A1P8BG37	Photosystem II stability/assembly factor chloroplast (HCF136) OS=Arabidopsis thaliana OX=3702 GN=HCF136 PE=1 SV=1	46914	Oxidation (M)	99.2	359.07	38	36	33	30	38	33	33	38	36	36	38	37	14	14	47	26	42	54	34	28	50	52	59	54	44
1451	1211.4	961.96	1416.2	840.72	679.47	1741.9	1651.3	2165.7	1333.9	1488.1	A0A7G2FHH4	Tubulin beta chain OS=Arabidopsis thaliana OX=3702 GN=AT9943_LOCUS21264 PE=3 SV=1	56783	Carbamidomethylation; Oxidation (M)	99.2	286	26	19	21	19	22	21	14	22	23	22	19	21	12	3	49	34	43	50	40	30	48	43	54	50	48
1451	1211.4	961.96	1416.2	840.72	679.47	1741.9	1651.3	2165.7	1333.9	1488.1	A0A178UGW7	Tubulin beta chain OS=Arabidopsis thaliana OX=3702 GN=AXX17_At5g42470 PE=3 SV=1	49823	Carbamidomethylation; Oxidation (M)	99.2	286	30	22	24	22	26	24	16	26	26	26	22	24	12	3	49	34	43	50	40	30	48	43	54	50	48
1451	1211.4	961.96	1416.2	840.72	679.47	1741.9	1651.3	2165.7	1333.9	1488.1	P24636	Tubulin beta-4 chain OS=Arabidopsis thaliana OX=3702 GN=TUBB4 PE=2 SV=2	49823	Carbamidomethylation; Oxidation (M)	99.2	286	30	22	24	22	26	24	16	26	26	26	22	24	12	3	49	34	43	50	40	30	48	43	54	50	48
4794.7	1356.7	2301.8	6361.1	3713.1	1754.5	2910.4	4200.5	7168.8	5445	5412.1	A0A178VAS8	PIP2A OS=Arabidopsis thaliana OX=3702 GN=At3g53420 PE=3 SV=1	28656	Acetylation (N-term)	98.8	252.65	19	19	13	19	19	19	19	19	19	19	19	19	6	4	40	23	32	63	43	25	53	40	53	53	59
4794.7	1356.7	2301.8	6361.1	3713.1	1754.5	2910.4	4200.5	7168.8	5445	5412.1	A0A178V8P4	(thale cress) hypothetical protein OS=Arabidopsis thaliana OX=3702 GN=AXX17_At3g47810 PE=3 SV=1	30474	Acetylation (N-term)	98.8	252.65	18	18	12	18	18	18	18	18	18	18	18	18	6	4	40	23	32	63	43	25	53	40	53	53	59
4794.7	1356.7	2301.8	6361.1	3713.1	1754.5	2910.4	4200.5	7168.8	5445	5412.1	P43286	Aquaporin PIP2-1 OS=Arabidopsis thaliana OX=3702 GN=PIP2-1 PE=1 SV=1	30474	Acetylation (N-term)	98.8	252.65	18	18	12	18	18	18	18	18	18	18	18	18	6	4	40	23	32	63	43	25	53	40	53	53	59
1691.9	763.23	1076.8	1570.8	954.01	343.91	1570.4	1172.6	1930.7	1553.8	1440.7	Q39102	ATP-dependent zinc metalloprotease FTSH 1 chloroplastic OS=Arabidopsis thaliana OX=3702 GN=FTSH1 PE=1 SV=2	76759	Carbamidomethylation; Oxidation (M)	99.2	330.34	26	25	17	19	23	19	16	22	22	24	21	21	17	6	54	27	38	48	40	31	53	42	56	46	46
1691.9	763.23	1076.8	1570.8	954.01	343.91	1570.4	1172.6	1930.7	1553.8	1440.7	A0A5S9WNH0	AAA domain-containing protein OS=Arabidopsis thaliana OX=3702 GN=C24_LOCUS4021 PE=3 SV=1	76745	Carbamidomethylation; Oxidation (M)	99.2	330.34	26	25	17	19	23	19	16	22	22	24	21	21	17	6	54	27	38	48	40	31	53	42	56	46	46
1691.9	763.23	1076.8	1570.8	954.01	343.91	1570.4	1172.6	1930.7	1553.8	1440.7	A0A178W3Y5	(thale cress) hypothetical protein OS=Arabidopsis thaliana OX=3702 GN=AXX17_At1g44460 PE=3 SV=1	76759	Carbamidomethylation; Oxidation (M)	99.2	330.34	26	25	17	19	23	19	16	22	22	24	21	21	17	6	54	27	38	48	40	31	53	42	56	46	46
190.36		0	436.19	169.94		157.24	244.36	561.43	321.98	618.31	A8MRW1	Plasma membrane intrinsic protein 1B OS=Arabidopsis thaliana OX=3702 GN=PIP1B PE=1 SV=1	32455	Oxidation (M); Acetylation (N-term)	99	225.94	17	17	11	17	17	17	11	17	17	17	17	17	5	1	43	34	42	54	44	40	40	37	62	41	40
190.36		0	436.19	169.94		157.24	244.36	561.43	321.98	618.31	B9DFR9	AT2G45960 protein OS=Arabidopsis thaliana OX=3702 GN=PIP1B PE=1 SV=1	29132	Oxidation (M); Acetylation (N-term)	98.9	225.94	18	18	12	18	18	18	12	18	18	18	18	18	5	1	43	34	42	54	44	40	40	37	62	41	40
190.36		0	436.19	169.94		157.24	244.36	561.43	321.98	618.31	D9IX99	Aquaporin OS=Arabidopsis thaliana OX=3702 GN=Aqua PE=2 SV=1	30598	Oxidation (M); Acetylation (N-term)	98.9	225.94	17	17	11	17	17	17	11	17	17	17	17	17	5	1	43	34	42	54	44	40	40	37	62	41	40
190.36		0	436.19	169.94		157.24	244.36	561.43	321.98	618.31	Q06611	Aquaporin PIP1-2 OS=Arabidopsis thaliana OX=3702 GN=PIP1-2 PE=1 SV=1	30598	Oxidation (M); Acetylation (N-term)	98.9	225.94	17	17	11	17	17	17	11	17	17	17	17	17	5	1	43	34	42	54	44	40	40	37	62	41	40
190.36		0	436.19	169.94		157.24	244.36	561.43	321.98	618.31	A0A384KNK4	Plasma membrane intrinsic protein 1 OS=Arabidopsis thaliana OX=3702 GN=AXX17_At2g43570 PE=3 SV=1	30598	Oxidation (M); Acetylation (N-term)	98.9	225.94	17	17	11	17	17	17	11	17	17	17	17	17	5	1	43	34	42	54	44	40	40	37	62	41	40
											P53496	Actin-11 OS=Arabidopsis thaliana OX=3702 GN=ACT11 PE=1 SV=1	41675	Carbamidomethylation; Oxidation (M); Acetylation (N-term)	99.2	272.19	28	24	18	21	24	21	19	26	21	28	26	26	12	0	45	32	39	52	44	40	43	32	50	43	55
											A0A384KGP1	(thale cress) hypothetical protein OS=Arabidopsis thaliana OX=3702 GN=AXX17_At3g12090 PE=3 SV=1	41675	Carbamidomethylation; Oxidation (M); Acetylation (N-term)	99.2	272.19	28	24	18	21	24	21	19	26	21	28	26	26	12	0	45	32	39	52	44	40	43	32	50	43	55
											Q541W9	Uncharacterized protein At3g12110/T21B14_108 OS=Arabidopsis thaliana OX=3702 GN=At3g12110/T21B14_108 PE=2 SV=1	41675	Carbamidomethylation; Oxidation (M); Acetylation (N-term)	99.2	272.19	28	24	18	21	24	21	19	26	21	28	26	26	12	0	45	32	39	52	44	40	43	32	50	43	55
34.396		0	115.76	34.186		0	33.191	0	0	0	P61837	Aquaporin PIP1-1 OS=Arabidopsis thaliana OX=3702 GN=PIP1-1 PE=1 SV=1	30689	Oxidation (M); Acetylation (N-term)	99.1	236.51	21	21	15	21	21	21	15	21	21	21	21	21	6	1	43	35	43	50	44	42	41	40	55	41	38
34.396		0	115.76	34.186		0	33.191	0	0	0	A0A178VIZ0	PIP1A OS=Arabidopsis thaliana OX=3702 GN=AXX17_At3g55710 PE=3 SV=1	30689	Oxidation (M); Acetylation (N-term)	99.1	236.51	21	21	15	21	21	21	15	21	21	21	21	21	6	1	43	35	43	50	44	42	41	40	55	41	38
8948.5	5238.2	6913.7	7018.6	5827.7	4176.2	8165.8	7309.8	8959.6	7782.6	8791.9	B9DHT7	AT2G30950 protein (Fragment) OS=Arabidopsis thaliana OX=3702 GN=At2g30950 PE=2 SV=1	62482	Oxidation (M)	99.2	312.43	25	24	21	22	23	21	21	25	23	25	25	21	13	7	51	34	37	33	40	32	53	42	54	50	44
8948.5	5238.2	6913.7	7018.6	5827.7	4176.2	8165.8	7309.8	8959.6	7782.6	8791.9	A0A654EYT4	AAA domain-containing protein OS=Arabidopsis thaliana OX=3702 GN=AN1_LOCUS9503 PE=3 SV=1	74184	Oxidation (M)	99.2	312.43	21	20	17	18	19	18	17	21	20	21	21	18	13	7	51	34	37	33	40	32	53	42	54	50	44
8948.5	5238.2	6913.7	7018.6	5827.7	4176.2	8165.8	7309.8	8959.6	7782.6	8791.9	A0A178W2Q8	(thale cress) hypothetical protein OS=Arabidopsis thaliana OX=3702 GN=AXX17_At2g27100 PE=3 SV=1	74157	Oxidation (M)	99.2	312.43	21	20	17	18	19	18	17	21	20	21	21	18	13	7	51	34	37	33	40	32	53	42	54	50	44
8948.5	5238.2	6913.7	7018.6	5827.7	4176.2	8165.8	7309.8	8959.6	7782.6	8791.9	O80860	ATP-dependent zinc metalloprotease FTSH 2 chloroplastic OS=Arabidopsis thaliana OX=3702 GN=FTSH2 PE=1 SV=1	74157	Oxidation (M)	99.2	312.43	21	20	17	18	19	18	17	21	20	21	21	18	13	7	51	34	37	33	40	32	53	42	54	50	44
8948.5	5238.2	6913.7	7018.6	5827.7	4176.2	8165.8	7309.8	8959.6	7782.6	8791.9	B9DHR0	AT2G30950 protein OS=Arabidopsis thaliana OX=3702 GN=At2g30950 PE=2 SV=1	74123	Oxidation (M)	99.2	312.43	21	20	17	18	19	18	17	21	20	21	21	18	13	7	51	34	37	33	40	32	53	42	54	50	44
8948.5	5238.2	6913.7	7018.6	5827.7	4176.2	8165.8	7309.8	8959.6	7782.6	8791.9	A0A1P8AXC1	FtsH extracellular protease family OS=Arabidopsis thaliana OX=3702 GN=VAR2 PE=1 SV=1	74678	Oxidation (M)	99.2	312.43	21	20	17	18	19	18	17	21	20	21	21	17	13	7	51	34	37	33	40	32	53	42	54	50	44
15635	13557	16064	18799	15031	10275	19291	15679	20908	18638	20710	A0A178UDQ4	(thale cress) hypothetical protein OS=Arabidopsis thaliana OX=3702 GN=AXX17_At5g20700 PE=3 SV=1	26802		99.2	314.99	58	36	32	35	36	36	32	39	36	58	36	36	13	13	37	24	34	53	42	27	56	38	66	43	44
15635	13557	16064	18799	15031	10275	19291	15679	20908	18638	20710	O65282	20 kDa chaperonin chloroplastic OS=Arabidopsis thaliana OX=3702 GN=CPN20 PE=1 SV=2	26802		99.2	314.99	58	36	32	35	36	36	32	39	36	58	36	36	13	13	37	24	34	53	42	27	56	38	66	43	44
			346.94	38.569		133.14		403	100.04	0	A0A178VS27	Tubulin beta chain OS=Arabidopsis thaliana OX=3702 GN=AXX17_At2g25630 PE=3 SV=1	50747	Carbamidomethylation; Oxidation (M)	99.2	296.42	36	26	24	26	31	26	16	31	30	34	27	31	14	2	39	31	39	42	47	31	40	40	53	47	54
			346.94	38.569		133.14		403	100.04	0	P29515	Tubulin beta-7 chain OS=Arabidopsis thaliana OX=3702 GN=TUBB7 PE=2 SV=1	50747	Carbamidomethylation; Oxidation (M)	99.2	296.42	36	26	24	26	31	26	16	31	30	34	27	31	14	2	39	31	39	42	47	31	40	40	53	47	54
4610.8	3600.6	4125.7	3444.8	2845.6	1952.4	3974	4221	2760.6	3532.8	3418.1	A0A7G2E947	Glycine cleavage system P protein OS=Arabidopsis thaliana OX=3702 GN=AT9943_LOCUS7716 PE=3 SV=1	112893	Carbamidomethylation; Oxidation (M)	99.2	302.02	15	12	10	10	13	8	8	11	11	14	11	13	16	6	46	30	42	52	35	36	43	46	47	42	41
4610.8	3600.6	4125.7	3444.8	2845.6	1952.4	3974	4221	2760.6	3532.8	3418.1	A0A5S9X1G5	Glycine cleavage system P protein OS=Arabidopsis thaliana OX=3702 GN=C24_LOCUS8853 PE=3 SV=1	113717	Carbamidomethylation; Oxidation (M)	99.2	302.02	15	12	10	10	13	8	8	11	11	14	11	13	16	6	46	30	42	52	35	36	43	46	47	42	41
4610.8	3600.6	4125.7	3444.8	2845.6	1952.4	3974	4221	2760.6	3532.8	3418.1	A0A178W2X1	Glycine cleavage system P protein OS=Arabidopsis thaliana OX=3702 GN=AXX17_At2g21920 PE=3 SV=1	113806	Carbamidomethylation; Oxidation (M)	99.2	302.02	15	12	10	10	13	8	8	11	11	14	11	13	16	6	46	30	42	52	35	36	43	46	47	42	41
4610.8	3600.6	4125.7	3444.8	2845.6	1952.4	3974	4221	2760.6	3532.8	3418.1	A0A654EW90	Glycine cleavage system P protein OS=Arabidopsis thaliana OX=3702 GN=AN1_LOCUS9001 PE=3 SV=1	113791	Carbamidomethylation; Oxidation (M)	99.2	302.02	15	12	10	10	13	8	8	11	11	14	11	13	16	6	46	30	42	52	35	36	43	46	47	42	41
4610.8	3600.6	4125.7	3444.8	2845.6	1952.4	3974	4221	2760.6	3532.8	3418.1	O80988	Glycine dehydrogenase (decarboxylating) 2 mitochondrial OS=Arabidopsis thaliana OX=3702 GN=GLDP2 PE=1 SV=1	113776	Carbamidomethylation; Oxidation (M)	99.2	302.02	15	12	10	10	13	8	8	11	11	14	11	13	16	6	46	30	42	52	35	36	43	46	47	42	41
6511.1	6242.5	6278.4	5637.5	5548.1	4481.2	7113.3	5675.2	6288.8	6176.6	7344.4	O23255	Adenosylhomocysteinase 1 OS=Arabidopsis thaliana OX=3702 GN=SAHH1 PE=1 SV=1	53379	Carbamidomethylation; Oxidation (M)	99.2	269.59	28	18	18	17	18	17	15	20	22	25	25	20	15	5	41	34	44	41	36	39	48	46	42	40	39
6511.1	6242.5	6278.4	5637.5	5548.1	4481.2	7113.3	5675.2	6288.8	6176.6	7344.4	A0A178UZR5	Adenosylhomocysteinase OS=Arabidopsis thaliana OX=3702 GN=AXX17_At4g15900 PE=3 SV=1	53379	Carbamidomethylation; Oxidation (M)	99.2	269.59	28	18	18	17	18	17	15	20	22	25	25	20	15	5	41	34	44	41	36	39	48	46	42	40	39
6511.1	6242.5	6278.4	5637.5	5548.1	4481.2	7113.3	5675.2	6288.8	6176.6	7344.4	Q5D6C4	Adenosylhomocysteinase OS=Arabidopsis thaliana OX=3702 GN=HOG1 PE=3 SV=1	53451	Carbamidomethylation; Oxidation (M)	99.2	269.59	28	18	18	17	18	17	15	20	22	25	25	20	15	5	41	34	44	41	36	39	48	46	42	40	39
6511.1	6242.5	6278.4	5637.5	5548.1	4481.2	7113.3	5675.2	6288.8	6176.6	7344.4	Q5D6C5	Adenosylhomocysteinase OS=Arabidopsis thaliana OX=3702 GN=HOG1 PE=3 SV=1	53391	Carbamidomethylation; Oxidation (M)	99.2	269.59	28	18	18	17	18	17	15	20	22	25	25	20	15	5	41	34	44	41	36	39	48	46	42	40	39
6511.1	6242.5	6278.4	5637.5	5548.1	4481.2	7113.3	5675.2	6288.8	6176.6	7344.4	Q5D6C3	Adenosylhomocysteinase OS=Arabidopsis thaliana OX=3702 GN=HOG1 PE=3 SV=1	53378	Carbamidomethylation; Oxidation (M)	99.2	269.59	28	18	18	17	18	17	15	20	22	25	25	20	15	5	41	34	44	41	36	39	48	46	42	40	39
17428	12461	13148	17617	13355	10984	16603	14997	18238	19106	18770	A0A5S9SE99	Photosystem II repair protein PSB27-H1 chloroplastic OS=Arabidopsis thaliana OX=3702 GN=C24_LOCUS312 PE=3 SV=1	18807	Oxidation (M)	98.9	186.69	22	18	18	18	18	18	18	18	18	18	22	18	4	4	44	31	32	40	38	35	38	38	49	50	51
17428	12461	13148	17617	13355	10984	16603	14997	18238	19106	18770	A0A7G2DRL9	(thale cress) hypothetical protein OS=Arabidopsis thaliana OX=3702 GN=AT9943_LOCUS235 PE=3 SV=1	18850	Oxidation (M)	98.9	186.69	22	18	18	18	18	18	18	18	18	18	22	18	4	4	44	31	32	40	38	35	38	38	49	50	51
17428	12461	13148	17617	13355	10984	16603	14997	18238	19106	18770	A0A178WF34	PSB27 OS=Arabidopsis thaliana OX=3702 GN=AXX17_At1g02870 PE=3 SV=1	18835	Oxidation (M)	98.9	186.69	22	18	18	18	18	18	18	18	18	18	22	18	4	4	44	31	32	40	38	35	38	38	49	50	51
17428	12461	13148	17617	13355	10984	16603	14997	18238	19106	18770	Q9LR64	Photosystem II repair protein PSB27-H1 chloroplastic OS=Arabidopsis thaliana OX=3702 GN=PSB27-1 PE=1 SV=1	18835	Oxidation (M)	98.9	186.69	22	18	18	18	18	18	18	18	18	18	22	18	4	4	44	31	32	40	38	35	38	38	49	50	51
40.115		0	36.586	26.575		191.67	97.767	159.35	0	203.77	A0A178UKM5	Tubulin beta chain OS=Arabidopsis thaliana OX=3702 GN=AXX17_At5g23450 PE=3 SV=1	50607	Carbamidomethylation; Oxidation (M)	99.2	297.9	33	26	22	26	31	23	13	31	33	31	24	28	13	1	36	27	37	39	46	29	40	42	56	44	50
40.115		0	36.586	26.575		191.67	97.767	159.35	0	203.77	P29516	Tubulin beta-8 chain OS=Arabidopsis thaliana OX=3702 GN=TUBB8 PE=2 SV=2	50607	Carbamidomethylation; Oxidation (M)	99.2	297.9	33	26	22	26	31	23	13	31	33	31	24	28	13	1	36	27	37	39	46	29	40	42	56	44	50
517.39	295.66	34.857	308.23	263.32	127.02	398.96	2020.5	462	305.79	109.89	A0A178UU99	Tubulin beta chain OS=Arabidopsis thaliana OX=3702 GN=AXX17_At4g24220 PE=3 SV=1	49658	Carbamidomethylation; Oxidation (M)	99.2	274.12	31	22	22	22	26	24	16	26	29	26	22	21	12	3	44	32	39	45	38	22	44	41	50	46	44
517.39	295.66	34.857	308.23	263.32	127.02	398.96	2020.5	462	305.79	109.89	P29517	Tubulin beta-9 chain OS=Arabidopsis thaliana OX=3702 GN=TUBB9 PE=1 SV=1	49658	Carbamidomethylation; Oxidation (M)	99.2	274.12	31	22	22	22	26	24	16	26	29	26	22	21	12	3	44	32	39	45	38	22	44	41	50	46	44
20653	11587	16750	20719	14807	8892.4	16049	19056	21085	18799	21370	P25697	Phosphoribulokinase chloroplastic OS=Arabidopsis thaliana OX=3702 GN=At1g32060 PE=1 SV=1	44464	Carbamidomethylation; Oxidation (M)	99.2	271.16	21	18	14	16	16	16	16	16	16	19	16	16	9	9	45	39	37	47	42	33	37	36	41	40	47
20653	11587	16750	20719	14807	8892.4	16049	19056	21085	18799	21370	A0A178WLP9	Phosphoribulokinase OS=Arabidopsis thaliana OX=3702 GN=AXX17_At1g32760 PE=3 SV=1	44464	Carbamidomethylation; Oxidation (M)	99.2	271.16	21	18	14	16	16	16	16	16	16	19	16	16	9	9	45	39	37	47	42	33	37	36	41	40	47
1663.4	1136.2	1598.4	2136.9	1599.2	831.19	1759.1	1569.7	2232.5	2111.6	2661.7	Q9SJQ9	Fructose-bisphosphate aldolase 6 cytosolic OS=Arabidopsis thaliana OX=3702 GN=FBA6 PE=1 SV=1	38387	Carbamidomethylation; Oxidation (M)	99.2	355.67	51	36	31	36	46	35	33	46	47	49	47	50	19	10	32	27	43	53	29	32	42	40	51	46	49
1663.4	1136.2	1598.4	2136.9	1599.2	831.19	1759.1	1569.7	2232.5	2111.6	2661.7	A0A178VRN7	Fructose-bisphosphate aldolase OS=Arabidopsis thaliana OX=3702 GN=AXX17_At2g33200 PE=3 SV=1	38387	Carbamidomethylation; Oxidation (M)	99.2	355.67	51	36	31	36	46	35	33	46	47	49	47	50	19	10	32	27	43	53	29	32	42	40	51	46	49
13217	3459.6	9256.9	20997	10875	2921	11399	18392	23732	11752	20266	A0A1P8AZ91	Chlorophyll a-b binding protein chloroplastic OS=Arabidopsis thaliana OX=3702 GN=LHCB2.1 PE=1 SV=1	35153		98.9	200.04	10	10	10	10	10	10	10	10	10	10	10	9	4	1	42	19	35	48	42	30	41	51	50	39	46
13217	3459.6	9256.9	20997	10875	2921	11399	18392	23732	11752	20266	A0A178VHN7	Chlorophyll a-b binding protein chloroplastic OS=Arabidopsis thaliana OX=3702 GN=AXX17_At3g30210 PE=3 SV=1	28803		98.8	200.04	12	12	12	12	12	12	12	12	12	12	12	11	4	1	42	19	35	48	42	30	41	51	50	39	46
13217	3459.6	9256.9	20997	10875	2921	11399	18392	23732	11752	20266	Q9XF87	Chlorophyll a-b binding protein 2.4 chloroplastic OS=Arabidopsis thaliana OX=3702 GN=LHCB2.4 PE=1 SV=1	28803		98.8	200.04	12	12	12	12	12	12	12	12	12	12	12	11	4	1	42	19	35	48	42	30	41	51	50	39	46
13217	3459.6	9256.9	20997	10875	2921	11399	18392	23732	11752	20266	A0A7G2EQ63	Chlorophyll a-b binding protein chloroplastic OS=Arabidopsis thaliana OX=3702 GN=AT9943_LOCUS12225 PE=3 SV=1	30160		98.8	200.04	12	12	12	12	12	12	12	12	12	12	12	11	4	1	42	19	35	48	42	30	41	51	50	39	46
13217	3459.6	9256.9	20997	10875	2921	11399	18392	23732	11752	20266	A0A1I9LMB4	Chlorophyll a-b binding protein chloroplastic OS=Arabidopsis thaliana OX=3702 GN=LHCB2.3 PE=1 SV=1	32588		98.8	200.04	11	11	11	11	11	11	11	11	11	11	11	10	4	1	42	19	35	48	42	30	41	51	50	39	46
13217	3459.6	9256.9	20997	10875	2921	11399	18392	23732	11752	20266	Q9SHR7	Chlorophyll a-b binding protein 2.1 chloroplastic OS=Arabidopsis thaliana OX=3702 GN=LHCB2.1 PE=1 SV=1	28650		98.8	200.04	12	12	12	12	12	12	12	12	12	12	12	11	4	1	42	19	35	48	42	30	41	51	50	39	46
13217	3459.6	9256.9	20997	10875	2921	11399	18392	23732	11752	20266	A0A178W1X5	Chlorophyll a-b binding protein chloroplastic OS=Arabidopsis thaliana OX=3702 GN=AXX17_At2g04230 PE=3 SV=1	28664		98.8	200.04	12	12	12	12	12	12	12	12	12	12	12	11	4	1	42	19	35	48	42	30	41	51	50	39	46
13217	3459.6	9256.9	20997	10875	2921	11399	18392	23732	11752	20266	A0A7G2ENY2	Chlorophyll a-b binding protein chloroplastic OS=Arabidopsis thaliana OX=3702 GN=AT9943_LOCUS12224 PE=3 SV=1	28761		98.7	200.04	12	12	12	12	12	12	12	12	12	12	12	11	4	1	42	19	35	48	42	30	41	51	50	39	46
13217	3459.6	9256.9	20997	10875	2921	11399	18392	23732	11752	20266	A0A178VT95	Chlorophyll a-b binding protein chloroplastic OS=Arabidopsis thaliana OX=3702 GN=AXX17_At2g04220 PE=3 SV=1	28606		98.4	200.04	12	12	12	12	12	12	12	12	12	12	12	11	4	1	42	19	35	48	42	30	41	51	50	39	46
13217	3459.6	9256.9	20997	10875	2921	11399	18392	23732	11752	20266	Q9S7J7	Chlorophyll a-b binding protein 2.2 chloroplastic OS=Arabidopsis thaliana OX=3702 GN=LHCB2.2 PE=1 SV=1	28621		98.4	200.04	12	12	12	12	12	12	12	12	12	12	12	11	4	1	42	19	35	48	42	30	41	51	50	39	46
13217	3459.6	9256.9	20997	10875	2921	11399	18392	23732	11752	20266	A0A654ETC9	Chlorophyll a-b binding protein chloroplastic OS=Arabidopsis thaliana OX=3702 GN=AN1_LOCUS7538 PE=3 SV=1	28621		98.4	200.04	12	12	12	12	12	12	12	12	12	12	12	11	4	1	42	19	35	48	42	30	41	51	50	39	46
3136.5	2697.8	3972	3811.9	2913.6	1605.9	4140.9	2478.6	4314.8	2781.2	2880	Q9LF98	Fructose-bisphosphate aldolase 8 cytosolic OS=Arabidopsis thaliana OX=3702 GN=FBA8 PE=1 SV=1	38540	Carbamidomethylation; Oxidation (M)	99.2	358.64	48	40	35	34	43	34	30	47	43	46	38	47	19	11	35	26	41	51	31	31	49	43	47	39	45
3136.5	2697.8	3972	3811.9	2913.6	1605.9	4140.9	2478.6	4314.8	2781.2	2880	A0A178V8L4	Fructose-bisphosphate aldolase OS=Arabidopsis thaliana OX=3702 GN=AXX17_At3g47340 PE=3 SV=1	38540	Carbamidomethylation; Oxidation (M)	99.2	358.64	48	40	35	34	43	34	30	47	43	46	38	47	19	11	35	26	41	51	31	31	49	43	47	39	45
4955.2	3549	3790.3	7548	4611	1159.5	6615.5	5144.1	8214.3	5736.8	6364.6	A0A178W817	geranylgeranyl diphosphate reductase OS=Arabidopsis thaliana OX=3702 GN=AXX17_At1g68850 PE=3 SV=1	51838	Carbamidomethylation; Oxidation (M)	99.2	351.9	34	30	30	30	30	30	19	32	32	33	32	34	18	18	36	33	38	53	33	23	50	38	41	40	49
4955.2	3549	3790.3	7548	4611	1159.5	6615.5	5144.1	8214.3	5736.8	6364.6	Q9CA67	Geranylgeranyl diphosphate reductase chloroplastic OS=Arabidopsis thaliana OX=3702 GN=CHLP PE=1 SV=1	51838	Carbamidomethylation; Oxidation (M)	99.2	351.9	34	30	30	30	30	30	19	32	32	33	32	34	18	18	36	33	38	53	33	23	50	38	41	40	49
3709.2	3794.4	2951.6	4468.9	2713	3277.5	4184.7	3479.4	4342.3	3716.3	5011.2	A0A5S9WML4	Dihydrolipoyl dehydrogenase OS=Arabidopsis thaliana OX=3702 GN=C24_LOCUS3799 PE=3 SV=1	54028	Carbamidomethylation; Oxidation (M)	99.2	305.87	31	24	21	21	26	21	21	21	27	29	24	24	15	8	43	34	35	34	33	31	42	44	52	41	44
3709.2	3794.4	2951.6	4468.9	2713	3277.5	4184.7	3479.4	4342.3	3716.3	5011.2	Q9M5K3	Dihydrolipoyl dehydrogenase 1 mitochondrial OS=Arabidopsis thaliana OX=3702 GN=LPD1 PE=1 SV=2	53988	Carbamidomethylation; Oxidation (M)	99.2	305.87	31	24	21	21	26	21	21	21	27	29	24	24	15	8	43	34	35	34	33	31	42	44	52	41	44
3709.2	3794.4	2951.6	4468.9	2713	3277.5	4184.7	3479.4	4342.3	3716.3	5011.2	A0A178W162	Dihydrolipoyl dehydrogenase OS=Arabidopsis thaliana OX=3702 GN=AXX17_At1g42080 PE=3 SV=1	53988	Carbamidomethylation; Oxidation (M)	99.2	305.87	31	24	21	21	26	21	21	21	27	29	24	24	15	8	43	34	35	34	33	31	42	44	52	41	44
2993.9	2536.9	2154.4	4603.1	3593	2956.7	3628.9	2899.6	4562.1	4972	4833.6	A0A178UG43	BIP2 OS=Arabidopsis thaliana OX=3702 GN=AXX17_At5g39840 PE=3 SV=1	73561	Oxidation (M)	99.2	328.04	27	17	13	18	27	16	12	20	21	23	21	24	20	17	32	19	26	71	38	26	36	36	52	42	49
2993.9	2536.9	2154.4	4603.1	3593	2956.7	3628.9	2899.6	4562.1	4972	4833.6	Q39043	Heat shock 70 kDa protein BIP2 OS=Arabidopsis thaliana OX=3702 GN=BIP2 PE=1 SV=2	73561	Oxidation (M)	99.2	328.04	27	17	13	18	27	16	12	20	21	23	21	24	20	17	32	19	26	71	38	26	36	36	52	42	49
2993.9	2536.9	2154.4	4603.1	3593	2956.7	3628.9	2899.6	4562.1	4972	4833.6	A0A1P8BF32	Heat shock protein 70 (Hsp 70) family protein OS=Arabidopsis thaliana OX=3702 GN=BIP2 PE=1 SV=1	74375	Oxidation (M)	99.2	328.04	27	17	13	18	27	16	12	20	21	23	21	24	20	17	32	19	26	71	38	26	36	36	52	42	49
2993.9	2536.9	2154.4	4603.1	3593	2956.7	3628.9	2899.6	4562.1	4972	4833.6	A0A7G2FF51	(thale cress) hypothetical protein OS=Arabidopsis thaliana OX=3702 GN=AT9943_LOCUS21053 PE=3 SV=1	78919	Oxidation (M)	99.2	328.04	26	16	13	17	26	15	12	19	20	22	20	23	20	17	32	19	26	71	38	26	36	36	52	42	49
								411.58		0	A0A7G2E6B1	(thale cress) hypothetical protein OS=Arabidopsis thaliana OX=3702 GN=AT9943_LOCUS5591 PE=3 SV=1	110662	Carbamidomethylation; Oxidation (M)	99.2	241.62	11	7	6	7	9	6	5	9	10	10	6	9	10	1	41	25	38	45	37	20	44	38	47	41	43
								411.58		0	A0A178WQG2	Tubulin beta chain OS=Arabidopsis thaliana OX=3702 GN=AXX17_At1g70230 PE=3 SV=1	50217	Carbamidomethylation; Oxidation (M)	99.2	241.62	25	15	13	15	19	14	10	19	21	23	13	20	10	1	41	25	38	45	37	20	44	38	47	41	43
								411.58		0	P12411	Tubulin beta-1 chain OS=Arabidopsis thaliana OX=3702 GN=TUBB1 PE=2 SV=1	50217	Carbamidomethylation; Oxidation (M)	99.2	241.62	25	15	13	15	19	14	10	19	21	23	13	20	10	1	41	25	38	45	37	20	44	38	47	41	43
			12281	5476.7	2978			6979.3	7446.2	10205	P27323	Heat shock protein 90-1 OS=Arabidopsis thaliana OX=3702 GN=HSP90-1 PE=1 SV=3	80636	Carbamidomethylation; Oxidation (M)	99.2	310.51	25	3	3	4	24	20	14	6	6	24	24	25	23	15	6	7	5	81	54	34	12	6	60	71	82
			12281	5476.7	2978			6979.3	7446.2	10205	A0A5S9YDN3	HATPase_c domain-containing protein OS=Arabidopsis thaliana OX=3702 GN=C24_LOCUS25348 PE=3 SV=1	81164	Carbamidomethylation; Oxidation (M)	99.2	310.51	25	3	3	4	24	20	13	6	6	24	24	25	23	15	6	7	5	81	54	34	12	6	60	71	82
			12281	5476.7	2978			6979.3	7446.2	10205	A0A178UIU1	HSP90.1 OS=Arabidopsis thaliana OX=3702 GN=AXX17_At5g51520 PE=3 SV=1	81150	Carbamidomethylation; Oxidation (M)	99.2	310.51	25	3	3	4	24	20	13	6	6	24	24	25	23	15	6	7	5	81	54	34	12	6	60	71	82
			12281	5476.7	2978			6979.3	7446.2	10205	A0A7G2FJM8	(thale cress) hypothetical protein OS=Arabidopsis thaliana OX=3702 GN=AT9943_LOCUS21999 PE=3 SV=1	143998	Carbamidomethylation; Oxidation (M)	99.2	310.51	14	1	1	2	13	11	7	3	3	13	13	14	23	15	6	7	5	81	54	34	12	6	60	71	82
7679.2	3407.2	5507.8	6260.1	3728.8	2681.6	6499.3	6642	7716.8	6215.7	6305	O65581	Fructose-bisphosphate aldolase 5 cytosolic OS=Arabidopsis thaliana OX=3702 GN=FBA5 PE=1 SV=1	38294	Carbamidomethylation	99.2	374.41	41	32	29	29	29	31	27	29	35	30	29	32	13	10	43	22	37	32	39	34	37	37	46	49	41
7679.2	3407.2	5507.8	6260.1	3728.8	2681.6	6499.3	6642	7716.8	6215.7	6305	A0A178V385	Fructose-bisphosphate aldolase OS=Arabidopsis thaliana OX=3702 GN=AXX17_At4g30610 PE=3 SV=1	38294	Carbamidomethylation	99.2	374.41	41	32	29	29	29	31	27	29	35	30	29	32	13	10	43	22	37	32	39	34	37	37	46	49	41
18494	12966	12978	16734	13596	11974	12148	15129	19993	17305	18993	A0A1P8BBQ0	malate dehydrogenase OS=Arabidopsis thaliana OX=3702 GN=PMDH2 PE=1 SV=1	37270	Carbamidomethylation; Oxidation (M)	99.2	278.7	31	27	18	19	27	21	21	29	27	27	29	23	9	9	44	24	27	38	30	26	42	42	62	43	38
18494	12966	12978	16734	13596	11974	12148	15129	19993	17305	18993	Q9ZP05	Malate dehydrogenase 2 peroxisomal OS=Arabidopsis thaliana OX=3702 GN=PMDH2 PE=1 SV=1	37369	Carbamidomethylation; Oxidation (M)	99.2	278.7	31	27	18	19	27	21	21	29	27	27	29	23	9	9	44	24	27	38	30	26	42	42	62	43	38
18494	12966	12978	16734	13596	11974	12148	15129	19993	17305	18993	A0A178UMW0	Malate dehydrogenase OS=Arabidopsis thaliana OX=3702 GN=AXX17_At5g09190 PE=3 SV=1	37369	Carbamidomethylation; Oxidation (M)	99.2	278.7	31	27	18	19	27	21	21	29	27	27	29	23	9	9	44	24	27	38	30	26	42	42	62	43	38
18494	12966	12978	16734	13596	11974	12148	15129	19993	17305	18993	F4KDZ4	Malate dehydrogenase OS=Arabidopsis thaliana OX=3702 GN=PMDH2 PE=1 SV=1	34976	Carbamidomethylation; Oxidation (M)	99.2	278.7	32	28	19	20	28	22	22	30	28	28	30	24	9	9	44	24	27	38	30	26	42	42	62	43	38
47.359	57.838	18.045	628.67	347.61	236.74	0		361.58	477.41	644.61	A0A5S9YGS6	(thale cress) hypothetical protein OS=Arabidopsis thaliana OX=3702 GN=AT9943_LOCUS22294 PE=3 SV=1	80034	Oxidation (M)	99.2	328.86	24	13	11	15	23	19	14	17	17	22	23	22	22	1	23	22	15	69	27	20	37	29	50	64	59
3431.3	2739.5	3460.5	2713.4	2614	1247.3	3809.4	3046.1	2696.3	2406.1	3142.8	O80448	Pyridoxal 5'-phosphate synthase subunit PDX1.1 OS=Arabidopsis thaliana OX=3702 GN=PDX11 PE=1 SV=1	32862	Carbamidomethylation; Oxidation (M); Acetylation (N-term)	99.2	301.47	43	41	34	37	36	34	30	37	34	34	33	41	14	10	43	34	40	44	28	25	48	38	37	40	38
3431.3	2739.5	3460.5	2713.4	2614	1247.3	3809.4	3046.1	2696.3	2406.1	3142.8	A0A178VZ00	PDX1.1 OS=Arabidopsis thaliana OX=3702 GN=AXX17_At2g35080 PE=3 SV=1	32862	Carbamidomethylation; Oxidation (M); Acetylation (N-term)	99.2	301.47	43	41	34	37	36	34	30	37	34	34	33	41	14	10	43	34	40	44	28	25	48	38	37	40	38
3431.3	2739.5	3460.5	2713.4	2614	1247.3	3809.4	3046.1	2696.3	2406.1	3142.8	A0A7G2EII3	(thale cress) hypothetical protein OS=Arabidopsis thaliana OX=3702 GN=AT9943_LOCUS8828 PE=3 SV=1	32847	Carbamidomethylation; Oxidation (M); Acetylation (N-term)	99.2	301.47	43	41	34	37	36	34	30	37	34	34	33	41	14	10	43	34	40	44	28	25	48	38	37	40	38
2094.7	995.85	1500.7	1707.9	1009.7	522.83	2192.2	2071	2088.1	2084.3	2062.4	A0A5S9X8Z0	UTP--glucose-1-phosphate uridylyltransferase OS=Arabidopsis thaliana OX=3702 GN=AT9943_LOCUS9972 PE=3 SV=1	51739	Carbamidomethylation; Oxidation (M); Acetylation (N-term)	99.2	306.86	39	29	27	28	32	26	22	29	36	32	35	35	16	9	35	35	42	37	29	25	40	36	45	43	48
2094.7	995.85	1500.7	1707.9	1009.7	522.83	2192.2	2071	2088.1	2084.3	2062.4	A0A654F576	UTP--glucose-1-phosphate uridylyltransferase OS=Arabidopsis thaliana OX=3702 GN=AN1_LOCUS11599 PE=3 SV=1	51755	Carbamidomethylation; Oxidation (M); Acetylation (N-term)	99.2	306.86	39	29	27	28	32	26	22	29	36	32	35	35	16	9	35	35	42	37	29	25	40	36	45	43	48
2094.7	995.85	1500.7	1707.9	1009.7	522.83	2192.2	2071	2088.1	2084.3	2062.4	Q9M9P3	UTP--glucose-1-phosphate uridylyltransferase 2 OS=Arabidopsis thaliana OX=3702 GN=UGP2 PE=1 SV=1	51739	Carbamidomethylation; Oxidation (M); Acetylation (N-term)	99.2	306.86	39	29	27	28	32	26	22	29	36	32	35	35	16	9	35	35	42	37	29	25	40	36	45	43	48
2094.7	995.85	1500.7	1707.9	1009.7	522.83	2192.2	2071	2088.1	2084.3	2062.4	A0A1I9LT03	UTP--glucose-1-phosphate uridylyltransferase OS=Arabidopsis thaliana OX=3702 GN=UGP1 PE=1 SV=1	51116	Carbamidomethylation; Oxidation (M); Acetylation (N-term)	99.2	306.86	40	29	28	28	33	27	22	29	36	33	36	36	16	9	35	35	42	37	29	25	40	36	45	43	48
2094.7	995.85	1500.7	1707.9	1009.7	522.83	2192.2	2071	2088.1	2084.3	2062.4	A0A178V8F3	UTP--glucose-1-phosphate uridylyltransferase OS=Arabidopsis thaliana OX=3702 GN=AXX17_At3g02580 PE=3 SV=1	51743	Carbamidomethylation; Oxidation (M); Acetylation (N-term)	99.2	306.86	39	29	27	28	32	26	22	29	36	32	35	35	16	9	35	35	42	37	29	25	40	36	45	43	48
2094.7	995.85	1500.7	1707.9	1009.7	522.83	2192.2	2071	2088.1	2084.3	2062.4	A0A1I9LT02	UTP--glucose-1-phosphate uridylyltransferase OS=Arabidopsis thaliana OX=3702 GN=UGP1 PE=1 SV=1	52855	Carbamidomethylation; Oxidation (M); Acetylation (N-term)	99.2	306.86	38	28	27	27	32	26	21	28	35	32	35	35	16	9	35	35	42	37	29	25	40	36	45	43	48
15043	10095	12681	11284	9145.5	9530.7	16291	12491	15216	11651	14921	A0A7G2FB59	(thale cress) hypothetical protein OS=Arabidopsis thaliana OX=3702 GN=AT9943_LOCUS20388 PE=4 SV=1	62923	Oxidation (M)	99.2	261.98	16	15	15	15	15	15	15	15	15	16	15	15	10	10	40	29	41	37	33	44	41	32	38	41	38
15043	10095	12681	11284	9145.5	9530.7	16291	12491	15216	11651	14921	A0A178ULV9	RPS1 OS=Arabidopsis thaliana OX=3702 GN=AXX17_At5g30380 PE=4 SV=1	45110	Oxidation (M)	99.2	261.98	22	21	21	21	21	21	21	21	21	22	21	21	10	10	40	29	41	37	33	44	41	32	38	41	38
15043	10095	12681	11284	9145.5	9530.7	16291	12491	15216	11651	14921	Q93VC7	30S ribosomal protein S1 chloroplastic OS=Arabidopsis thaliana OX=3702 GN=RPS1 PE=1 SV=1	45110	Oxidation (M)	99.2	261.98	22	21	21	21	21	21	21	21	21	22	21	21	10	10	40	29	41	37	33	44	41	32	38	41	38
1893.1	1650.7	1166.6	1455.9	1344.1	751.69	1699.1	1299.9	1777.8	1513.2	2408.3	P42799	Glutamate-1-semialdehyde 2 1-aminomutase 1 chloroplastic OS=Arabidopsis thaliana OX=3702 GN=GSA1 PE=1 SV=1	50370	Carbamidomethylation; Oxidation (M)	99.2	304.07	27	26	26	26	23	23	22	26	26	27	23	26	12	5	35	36	37	42	30	32	44	34	37	42	45
1893.1	1650.7	1166.6	1455.9	1344.1	751.69	1699.1	1299.9	1777.8	1513.2	2408.3	A0A178UF15	glutamate-1-semialdehyde 2 1-aminomutase OS=Arabidopsis thaliana OX=3702 GN=AXX17_At5g63120 PE=3 SV=1	50354	Carbamidomethylation; Oxidation (M)	99.2	304.07	27	26	26	26	23	23	22	26	26	27	23	26	12	5	35	36	37	42	30	32	44	34	37	42	45
1893.1	1650.7	1166.6	1455.9	1344.1	751.69	1699.1	1299.9	1777.8	1513.2	2408.3	A0A654GDN2	glutamate-1-semialdehyde 2 1-aminomutase OS=Arabidopsis thaliana OX=3702 GN=AN1_LOCUS26670 PE=3 SV=1	50370	Carbamidomethylation; Oxidation (M)	99.2	304.07	27	26	26	26	23	23	22	26	26	27	23	26	12	5	35	36	37	42	30	32	44	34	37	42	45
				1454.1							C0Z2E9	glutamine synthetase OS=Arabidopsis thaliana OX=3702 GN=At5g35630 PE=2 SV=1	30674		99	184.22	16	13	8	8	13	16	8	13	10	13	13	13	4	1	38	34	36	39	38	30	34	30	47	37	50
1028.2	1892.9	1754.3	1292.4	1109.1	34.011	2175.8	1336	2138.2	2260.9	1567.8	A0A178WHC3	Phosphoglycerate kinase OS=Arabidopsis thaliana OX=3702 GN=AXX17_At1g74350 PE=3 SV=1	42132	Oxidation (M)	99.2	297.65	38	18	22	22	25	23	14	22	20	35	22	16	12	9	31	33	32	35	35	39	45	35	43	48	35
1028.2	1892.9	1754.3	1292.4	1109.1	34.011	2175.8	1336	2138.2	2260.9	1567.8	Q9SAJ4	Phosphoglycerate kinase 3 cytosolic OS=Arabidopsis thaliana OX=3702 GN=PGK3 PE=1 SV=1	42132	Oxidation (M)	99.2	297.65	38	18	22	22	25	23	14	22	20	35	22	16	12	9	31	33	32	35	35	39	45	35	43	48	35
1028.2	1892.9	1754.3	1292.4	1109.1	34.011	2175.8	1336	2138.2	2260.9	1567.8	A0A5S9WVT0	Phosphoglycerate kinase OS=Arabidopsis thaliana OX=3702 GN=AT9943_LOCUS5928 PE=3 SV=1	42148	Oxidation (M)	99.2	297.65	38	18	22	22	25	23	14	22	20	35	22	16	12	9	31	33	32	35	35	39	45	35	43	48	35
13410	5500.9	10260	15410	9224.9	3981.8	13610	17604	24438	13329	15380	Q9SY97	Photosystem I chlorophyll a/b-binding protein 3-1 chloroplastic OS=Arabidopsis thaliana OX=3702 GN=LHCA3 PE=1 SV=1	29181	Oxidation (M)	98.4	195.86	14	14	14	14	14	14	14	14	14	14	14	14	3	3	42	20	24	40	32	21	39	47	55	46	45
13410	5500.9	10260	15410	9224.9	3981.8	13610	17604	24438	13329	15380	A0A178W5Y6	Chlorophyll a-b binding protein chloroplastic OS=Arabidopsis thaliana OX=3702 GN=AXX17_At1g54730 PE=3 SV=1	29181	Oxidation (M)	98.4	195.86	14	14	14	14	14	14	14	14	14	14	14	14	3	3	42	20	24	40	32	21	39	47	55	46	45
21024	15763	14884	15755	14450	9623.5	20958	20287	22461	16706	21658	A0A178VJX5	Peptidyl-prolyl cis-trans isomerase OS=Arabidopsis thaliana OX=3702 GN=AXX17_At3g56320 PE=3 SV=1	28208	Oxidation (M)	99.2	187.73	20	14	14	20	14	11	11	20	14	11	11	14	5	5	30	26	34	37	30	27	42	51	49	42	42
21024	15763	14884	15755	14450	9623.5	20958	20287	22461	16706	21658	P34791	Peptidyl-prolyl cis-trans isomerase CYP20-3 chloroplastic OS=Arabidopsis thaliana OX=3702 GN=CYP20-3 PE=1 SV=1	28208	Oxidation (M)	99.2	187.73	20	14	14	20	14	11	11	20	14	11	11	14	5	5	30	26	34	37	30	27	42	51	49	42	42
21024	15763	14884	15755	14450	9623.5	20958	20287	22461	16706	21658	F4IX26	Rotamase CYP 4 OS=Arabidopsis thaliana OX=3702 GN=ROC4 PE=1 SV=1	34318	Oxidation (M)	99.2	187.73	16	12	12	16	12	9	9	16	12	9	9	12	5	5	30	26	34	37	30	27	42	51	49	42	42
1896.4	2234.7	2171.9	2058.4	1917.1	1866.1	2375.6	1818.9	2721.6	2253.3	2547.2	A0A7G2ESI9	glutamate-1-semialdehyde 2 1-aminomutase OS=Arabidopsis thaliana OX=3702 GN=AT9943_LOCUS13094 PE=3 SV=1	101038	Carbamidomethylation; Oxidation (M)	99.2	302.9	17	15	15	16	14	14	12	15	14	15	13	14	14	7	39	36	39	43	31	29	43	29	40	38	42
104.24	50.525	107.03	91.366	72.027	15.32	0	104.59	106.94	118.34	78.151	A0A5S9X788	transketolase OS=Arabidopsis thaliana OX=3702 GN=C24_LOCUS10887 PE=3 SV=1	79922	Carbamidomethylation; Acetylation (N-term)	99.2	250.04	10	10	9	9	9	10	9	9	10	9	9	10	7	1	34	31	29	39	39	30	39	38	44	36	48
104.24	50.525	107.03	91.366	72.027	15.32	0	104.59	106.94	118.34	78.151	A0A178VQH8	transketolase OS=Arabidopsis thaliana OX=3702 GN=AXX17_At2g42870 PE=3 SV=1	79950	Carbamidomethylation; Acetylation (N-term)	99.2	250.04	10	10	9	9	9	10	9	9	10	9	9	10	7	1	34	31	29	39	39	30	39	38	44	36	48
104.24	50.525	107.03	91.366	72.027	15.32	0	104.59	106.94	118.34	78.151	A0A654F253	transketolase OS=Arabidopsis thaliana OX=3702 GN=AN1_LOCUS11048 PE=3 SV=1	79980	Carbamidomethylation; Acetylation (N-term)	99.2	250.04	10	10	9	9	9	10	9	9	10	9	9	10	7	1	34	31	29	39	39	30	39	38	44	36	48
104.24	50.525	107.03	91.366	72.027	15.32	0	104.59	106.94	118.34	78.151	F4IW47	Transketolase-2 chloroplastic OS=Arabidopsis thaliana OX=3702 GN=TKL-2 PE=1 SV=1	79922	Carbamidomethylation; Acetylation (N-term)	99.2	250.04	10	10	9	9	9	10	9	9	10	9	9	10	7	1	34	31	29	39	39	30	39	38	44	36	48
104.24	50.525	107.03	91.366	72.027	15.32	0	104.59	106.94	118.34	78.151	A0A7G2EIA1	transketolase OS=Arabidopsis thaliana OX=3702 GN=AT9943_LOCUS9504 PE=3 SV=1	79705	Carbamidomethylation; Acetylation (N-term)	99.2	250.04	10	10	9	9	9	10	9	9	10	9	9	10	7	1	34	31	29	39	39	30	39	38	44	36	48
248.07	81.862	205.14	144.48	189.24	178.32	100.66	189.77	232.93	196.43	302.93	A0A178WIA6	(thale cress) hypothetical protein OS=Arabidopsis thaliana OX=3702 GN=AXX17_At1g00690 PE=3 SV=1	30633	Oxidation (M); Acetylation (N-term)	98.9	165.87	15	15	15	15	14	14	14	15	14	15	15	15	5	2	37	32	38	40	40	38	34	32	48	34	31
248.07	81.862	205.14	144.48	189.24	178.32	100.66	189.77	232.93	196.43	302.93	Q08733	Aquaporin PIP1-3 OS=Arabidopsis thaliana OX=3702 GN=PIP1-3 PE=1 SV=1	30633	Oxidation (M); Acetylation (N-term)	98.9	165.87	15	15	15	15	14	14	14	15	14	15	15	15	5	2	37	32	38	40	40	38	34	32	48	34	31
			0					0			P0CJ46	Actin-1 OS=Arabidopsis thaliana OX=3702 GN=ACT1 PE=1 SV=1	41798	Carbamidomethylation; Oxidation (M); Acetylation (N-term)	99.2	255.37	26	19	13	14	24	16	14	21	16	26	19	21	11	1	37	31	31	43	37	36	34	27	41	34	48
			0					0			P0CJ47	Actin-3 OS=Arabidopsis thaliana OX=3702 GN=ACT3 PE=1 SV=1	41798	Carbamidomethylation; Oxidation (M); Acetylation (N-term)	99.2	255.37	26	19	13	14	24	16	14	21	16	26	19	21	11	1	37	31	31	43	37	36	34	27	41	34	48
			0					0			A0A384LCZ9	(thale cress) hypothetical protein OS=Arabidopsis thaliana OX=3702 GN=AXX17_At2g34430 PE=3 SV=1	41798	Carbamidomethylation; Oxidation (M); Acetylation (N-term)	99.2	255.37	26	19	13	14	24	16	14	21	16	26	19	21	11	1	37	31	31	43	37	36	34	27	41	34	48
			0					0			A0A178VSL1	Actin 3 OS=Arabidopsis thaliana OX=3702 PE=3 SV=1	41798	Carbamidomethylation; Oxidation (M); Acetylation (N-term)	99.2	255.37	26	19	13	14	24	16	14	21	16	26	19	21	11	1	37	31	31	43	37	36	34	27	41	34	48
			0					0			F1LIM0	Actin 1 OS=Arabidopsis thaliana OX=3702 PE=3 SV=1	41764	Carbamidomethylation; Oxidation (M); Acetylation (N-term)	99.2	255.37	26	19	13	14	24	16	14	21	16	26	19	21	11	1	37	31	31	43	37	36	34	27	41	34	48
0	0		103.22		0	0			36.354	104.77	P51818	Heat shock protein 90-3 OS=Arabidopsis thaliana OX=3702 GN=HSP90-3 PE=1 SV=2	80052	Oxidation (M)	99.2	328.93	24	13	11	13	23	17	14	17	17	21	23	22	22	1	20	18	14	68	24	19	36	29	48	61	57
0	0		103.22		0	0			36.354	104.77	A0A178U8T0	Hsp81.3 OS=Arabidopsis thaliana OX=3702 GN=AXX17_At5g55180 PE=3 SV=1	80052	Oxidation (M)	99.2	328.93	24	13	11	13	23	17	14	17	17	21	23	22	22	1	20	18	14	68	24	19	36	29	48	61	57
0	0		103.22		0	0			36.354	104.77	A0A7G2FMX3	(thale cress) hypothetical protein OS=Arabidopsis thaliana OX=3702 GN=AT9943_LOCUS22293 PE=3 SV=1	101043	Oxidation (M)	99.2	328.93	19	11	9	10	18	14	11	13	14	16	18	17	22	1	20	18	14	68	24	19	36	29	48	61	57
6409.7	3255.9	6250.2	8592.2	6712.5	1513.4	9479.5	10066	11865	12111	9340.4	P37702	Myrosinase 1 OS=Arabidopsis thaliana OX=3702 GN=TGG1 PE=1 SV=1	61133	Carbamidomethylation; Oxidation (M)	99.2	306.61	18	16	13	16	16	16	11	16	16	17	16	16	9	8	31	27	28	35	29	29	41	40	44	42	44
6409.7	3255.9	6250.2	8592.2	6712.5	1513.4	9479.5	10066	11865	12111	9340.4	A0A178U7L7	TGG1 OS=Arabidopsis thaliana OX=3702 GN=AXX17_At5g25990 PE=3 SV=1	61133	Carbamidomethylation; Oxidation (M)	99.2	306.61	18	16	13	16	16	16	11	16	16	17	16	16	9	8	31	27	28	35	29	29	41	40	44	42	44
6409.7	3255.9	6250.2	8592.2	6712.5	1513.4	9479.5	10066	11865	12111	9340.4	A0A5S9Y7N4	Thioglucosidase OS=Arabidopsis thaliana OX=3702 GN=C24_LOCUS23228 PE=3 SV=1	61896	Carbamidomethylation; Oxidation (M)	99.2	306.61	18	16	13	16	16	16	11	16	16	17	16	16	9	8	31	27	28	35	29	29	41	40	44	42	44
6409.7	3255.9	6250.2	8592.2	6712.5	1513.4	9479.5	10066	11865	12111	9340.4	A0A654G4R0	Thioglucosidase OS=Arabidopsis thaliana OX=3702 GN=AN1_LOCUS23349 PE=3 SV=1	61910	Carbamidomethylation; Oxidation (M)	99.2	306.61	18	16	13	16	16	16	11	16	16	17	16	16	9	8	31	27	28	35	29	29	41	40	44	42	44
5385	2982.4	4411.1	6174.2	3411.4	1845.8	6378.9	6123.9	8555.5	5598.4	5975	A0A178VHT6	Ribosome-recycling factor chloroplastic OS=Arabidopsis thaliana OX=3702 GN=AXX17_At3g57470 PE=3 SV=1	30388	Oxidation (M)	99.2	282.72	37	35	27	29	35	32	25	35	35	37	32	32	10	10	39	23	29	46	30	23	33	38	49	41	36
5385	2982.4	4411.1	6174.2	3411.4	1845.8	6378.9	6123.9	8555.5	5598.4	5975	A0A5S9XN97	Ribosome-recycling factor chloroplastic OS=Arabidopsis thaliana OX=3702 GN=C24_LOCUS16581 PE=3 SV=1	30482	Oxidation (M)	99.2	282.72	37	35	27	29	35	32	25	35	35	37	32	32	10	10	39	23	29	46	30	23	33	38	49	41	36
5385	2982.4	4411.1	6174.2	3411.4	1845.8	6378.9	6123.9	8555.5	5598.4	5975	Q9M1X0	Ribosome-recycling factor chloroplastic OS=Arabidopsis thaliana OX=3702 GN=RRF PE=2 SV=2	30422	Oxidation (M)	99.2	282.72	37	35	27	29	35	32	25	35	35	37	32	32	10	10	39	23	29	46	30	23	33	38	49	41	36
		0		0			0	38.271	58.952	55.922	A0A178USZ7	TMP-C OS=Arabidopsis thaliana OX=3702 GN=AXX17_At4g00560 PE=3 SV=1	30693	Oxidation (M); Acetylation (N-term)	98.9	180.81	15	10	10	14	10	14	10	10	14	15	15	15	5	2	32	28	35	38	39	35	31	31	48	33	36
		0		0			0	38.271	58.952	55.922	Q39196	Probable aquaporin PIP1-4 OS=Arabidopsis thaliana OX=3702 GN=PIP1.4 PE=1 SV=1	30693	Oxidation (M); Acetylation (N-term)	98.9	180.81	15	10	10	14	10	14	10	10	14	15	15	15	5	2	32	28	35	38	39	35	31	31	48	33	36
6336.8	3545.2	3601.3	6507.2	4896.3	2758.9	6371.3	4420.6	7531.4	7109.3	7433.5	Q9LFA3	Monodehydroascorbate reductase 1 peroxisomal OS=Arabidopsis thaliana OX=3702 GN=MDAR1 PE=1 SV=1	46487	Oxidation (M)	99.2	306.67	35	35	24	32	35	33	24	33	29	32	35	34	13	13	39	26	31	40	25	20	36	31	45	43	38
6336.8	3545.2	3601.3	6507.2	4896.3	2758.9	6371.3	4420.6	7531.4	7109.3	7433.5	A0A178VLU2	(thale cress) hypothetical protein OS=Arabidopsis thaliana OX=3702 GN=AXX17_At3g47290 PE=4 SV=1	46487	Oxidation (M)	99.2	306.67	35	35	24	32	35	33	24	33	29	32	35	34	13	13	39	26	31	40	25	20	36	31	45	43	38
6336.8	3545.2	3601.3	6507.2	4896.3	2758.9	6371.3	4420.6	7531.4	7109.3	7433.5	F4J849	Monodehydroascorbate reductase 1 OS=Arabidopsis thaliana OX=3702 GN=MDAR1 PE=1 SV=1	50160	Oxidation (M)	99.2	306.67	32	32	23	30	32	31	23	30	27	30	32	31	13	13	39	26	31	40	25	20	36	31	45	43	38
5780.2	2881.8	3920.8	6287.2	3777.6	2048	5495.4	6684.1	6526.5	6280.2	20452	A0A178WHT4	TLP18.3 OS=Arabidopsis thaliana OX=3702 GN=AXX17_At1g49280 PE=4 SV=1	31139		99.1	267.44	28	25	18	25	28	23	13	28	26	26	28	26	8	8	36	25	27	38	26	24	26	35	45	47	43
5780.2	2881.8	3920.8	6287.2	3777.6	2048	5495.4	6684.1	6526.5	6280.2	20452	Q9ZVL6	UPF0603 protein At1g54780 chloroplastic OS=Arabidopsis thaliana OX=3702 GN=At1g54780 PE=1 SV=1	31139		99.1	267.44	28	25	18	25	28	23	13	28	26	26	28	26	8	8	36	25	27	38	26	24	26	35	45	47	43
3259.6	1142.1	2217.5	3411.8	2160.8	1170.1	3386.3	3110.1	3722.3	4207.6	4345	A0A178UZ53	GRF1 OS=Arabidopsis thaliana OX=3702 GN=At4g09000 PE=3 SV=1	29904	Oxidation (M); Acetylation (N-term)	99.2	299.89	51	44	41	47	44	43	26	47	51	45	44	47	13	5	37	15	31	37	29	13	34	32	44	40	52
3259.6	1142.1	2217.5	3411.8	2160.8	1170.1	3386.3	3110.1	3722.3	4207.6	4345	P42643	14-3-3-like protein GF14 chi OS=Arabidopsis thaliana OX=3702 GN=GRF1 PE=1 SV=3	29932	Oxidation (M); Acetylation (N-term)	99.2	299.89	51	44	41	47	44	43	26	47	51	45	44	47	13	5	37	15	31	37	29	13	34	32	44	40	52
3259.6	1142.1	2217.5	3411.8	2160.8	1170.1	3386.3	3110.1	3722.3	4207.6	4345	A0A5S9XQK2	14_3_3 domain-containing protein OS=Arabidopsis thaliana OX=3702 GN=C24_LOCUS17398 PE=3 SV=1	29932	Oxidation (M); Acetylation (N-term)	99.2	299.89	51	44	41	47	44	43	26	47	51	45	44	47	13	5	37	15	31	37	29	13	34	32	44	40	52
3259.6	1142.1	2217.5	3411.8	2160.8	1170.1	3386.3	3110.1	3722.3	4207.6	4345	A0A7G2F1J8	(thale cress) hypothetical protein OS=Arabidopsis thaliana OX=3702 GN=AT9943_LOCUS15081 PE=3 SV=1	30244	Oxidation (M); Acetylation (N-term)	99.2	299.89	50	44	41	46	44	43	26	46	50	44	43	47	13	5	37	15	31	37	29	13	34	32	44	40	52
3259.6	1142.1	2217.5	3411.8	2160.8	1170.1	3386.3	3110.1	3722.3	4207.6	4345	F4JJ94	General regulatory factor 1 OS=Arabidopsis thaliana OX=3702 GN=GRF1 PE=1 SV=1	35839	Oxidation (M); Acetylation (N-term)	99.2	299.89	43	37	35	39	37	36	22	39	42	38	37	40	13	5	37	15	31	37	29	13	34	32	44	40	52
14722	12897	14392	13704	12993	7376.7	13495	12076	14717	13901	16866	P93819	Malate dehydrogenase 1 cytoplasmic OS=Arabidopsis thaliana OX=3702 GN=MDH1 PE=1 SV=2	35571	Carbamidomethylation; Oxidation (M)	99.2	284.06	33	20	11	20	20	20	16	22	20	33	22	20	10	10	33	25	34	32	30	28	41	31	43	36	31
14722	12897	14392	13704	12993	7376.7	13495	12076	14717	13901	16866	A0A178W4H0	Malate dehydrogenase OS=Arabidopsis thaliana OX=3702 GN=AXX17_At1g03690 PE=3 SV=1	35571	Carbamidomethylation; Oxidation (M)	99.2	284.06	33	20	11	20	20	20	16	22	20	33	22	20	10	10	33	25	34	32	30	28	41	31	43	36	31
2856.9	1967.9	2363.5	3363.5	2279.1	1639.2	3676.5	3000.2	3834.7	2020.8	3368.8	Q9SF40	60S ribosomal protein L4-1 OS=Arabidopsis thaliana OX=3702 GN=RPL4A PE=1 SV=1	44702	Carbamidomethylation; Oxidation (M)	99.2	311.35	26	22	22	22	26	22	17	26	26	26	26	26	11	5	32	28	27	47	23	21	43	29	42	30	39
2856.9	1967.9	2363.5	3363.5	2279.1	1639.2	3676.5	3000.2	3834.7	2020.8	3368.8	Q8LA93	60S ribosomal protein L4-B (L1) OS=Arabidopsis thaliana OX=3702 PE=2 SV=1	44601	Carbamidomethylation; Oxidation (M)	99.2	311.35	26	22	22	22	26	22	17	26	26	26	26	26	11	5	32	28	27	47	23	21	43	29	42	30	39
2856.9	1967.9	2363.5	3363.5	2279.1	1639.2	3676.5	3000.2	3834.7	2020.8	3368.8	A0A178VDX8	(thale cress) hypothetical protein OS=Arabidopsis thaliana OX=3702 GN=AXX17_At3g09270 PE=3 SV=1	44702	Carbamidomethylation; Oxidation (M)	99.2	311.35	26	22	22	22	26	22	17	26	26	26	26	26	11	5	32	28	27	47	23	21	43	29	42	30	39
									167.76		A0A654FCY2	Lipoxygenase OS=Arabidopsis thaliana OX=3702 GN=AN1_LOCUS14840 PE=3 SV=1	101976	Carbamidomethylation; Oxidation (M)	99.2	278.88	17	12	8	12	13	11	4	14	12	14	13	12	16	1	38	21	35	33	19	11	39	42	41	38	36
6585.5	3011.1	4901.7	7647	3932	2706.1	6816.9	5177.4	8541.7	7721	8908.4	A0A654ECJ1	(thale cress) hypothetical protein OS=Arabidopsis thaliana OX=3702 GN=AN1_LOCUS2521 PE=3 SV=1	40986		99.2	304.83	42	33	22	26	36	31	15	34	30	37	36	36	15	15	33	18	23	48	28	13	32	34	46	35	41
6585.5	3011.1	4901.7	7647	3932	2706.1	6816.9	5177.4	8541.7	7721	8908.4	Q9ZUC1	NADPH-dependent alkenal/one oxidoreductase chloroplastic OS=Arabidopsis thaliana OX=3702 GN=AOR PE=1 SV=2	40986		99.2	304.83	42	33	22	26	36	31	15	34	30	37	36	36	15	15	33	18	23	48	28	13	32	34	46	35	41
8044.3	2992.5	6232.7	7885.4	4946.9	2434.4	8654.6	7485.8	9919	8779.9	8649.5	A0A178WBY7	Glycine cleavage system H protein OS=Arabidopsis thaliana OX=3702 GN=AXX17_At1g33260 PE=3 SV=1	17897	Carbamidomethylation; Oxidation (M)	99	200.15	33	27	22	22	27	33	22	27	27	27	33	33	4	1	33	18	24	43	23	9	37	38	45	41	40
8044.3	2992.5	6232.7	7885.4	4946.9	2434.4	8654.6	7485.8	9919	8779.9	8649.5	Q9LQL0	Glycine cleavage system H protein 3 mitochondrial OS=Arabidopsis thaliana OX=3702 GN=GDH3 PE=1 SV=1	17897	Carbamidomethylation; Oxidation (M)	99	200.15	33	27	22	22	27	33	22	27	27	27	33	33	4	1	33	18	24	43	23	9	37	38	45	41	40
13424	7056.8	10918	14813	10535	6061.1	13552	9923.2	16590	13690	15211	Q949U7	Peroxiredoxin-2E chloroplastic OS=Arabidopsis thaliana OX=3702 GN=PRXIIE PE=1 SV=2	24684	Carbamidomethylation; Oxidation (M)	99.1	285.73	40	37	22	22	40	26	22	37	40	40	37	40	8	8	29	17	27	41	25	24	33	32	43	39	39
13424	7056.8	10918	14813	10535	6061.1	13552	9923.2	16590	13690	15211	A0A178VHG0	Glutaredoxin-dependent peroxiredoxin OS=Arabidopsis thaliana OX=3702 GN=AXX17_At3g47370 PE=3 SV=1	24684	Carbamidomethylation; Oxidation (M)	99.1	285.73	40	37	22	22	40	26	22	37	40	40	37	40	8	8	29	17	27	41	25	24	33	32	43	39	39
10552	5595.8	6787.3	10846	7410.3	2406.7	9388.9	11854	16440	10929	9079.1	O04616	Protein CURVATURE THYLAKOID 1A chloroplastic OS=Arabidopsis thaliana OX=3702 GN=CURT1A PE=1 SV=1	17698		99	237.54	24	24	12	12	24	12	12	23	24	24	24	23	8	8	34	21	25	42	28	20	26	31	50	36	31
10552	5595.8	6787.3	10846	7410.3	2406.7	9388.9	11854	16440	10929	9079.1	A0A178UVW5	(thale cress) hypothetical protein OS=Arabidopsis thaliana OX=3702 GN=AXX17_At4g01490 PE=4 SV=1	17698		99	237.54	24	24	12	12	24	12	12	23	24	24	24	23	8	8	34	21	25	42	28	20	26	31	50	36	31
10552	5595.8	6787.3	10846	7410.3	2406.7	9388.9	11854	16440	10929	9079.1	A0A654FKX4	CAAD domain-containing protein OS=Arabidopsis thaliana OX=3702 GN=AN1_LOCUS16897 PE=4 SV=1	17712		99	237.54	24	24	12	12	24	12	12	23	24	24	24	23	8	8	34	21	25	42	28	20	26	31	50	36	31
9486	2710.8	6381.9	14495	8146.6	2228.6	8551.7	12083	15381	8566.9	13989	Q39142	Chlorophyll a-b binding protein chloroplastic OS=Arabidopsis thaliana OX=3702 GN=Lhb1B1 PE=1 SV=1	28170		98.8	244.54	18	18	13	18	18	18	13	18	18	18	18	17	5	2	30	14	31	37	34	21	35	44	33	34	31
9486	2710.8	6381.9	14495	8146.6	2228.6	8551.7	12083	15381	8566.9	13989	A0A178VW93	Chlorophyll a-b binding protein chloroplastic OS=Arabidopsis thaliana OX=3702 GN=AXX17_At2g30970 PE=3 SV=1	28186		98.8	244.54	18	18	13	18	18	18	13	18	18	18	18	17	5	2	30	14	31	37	34	21	35	44	33	34	31
9486	2710.8	6381.9	14495	8146.6	2228.6	8551.7	12083	15381	8566.9	13989	A0A654EYS2	Chlorophyll a-b binding protein chloroplastic OS=Arabidopsis thaliana OX=3702 GN=AN1_LOCUS9885 PE=3 SV=1	28170		98.8	244.54	18	18	13	18	18	18	13	18	18	18	18	17	5	2	30	14	31	37	34	21	35	44	33	34	31
6524.7	3375.7	5339.9	5430.8	3639.9	2490.9	4656.3	5360.7	4627.7	5121	5859.3	Q9SRZ6	Cytosolic isocitrate dehydrogenase [NADP] OS=Arabidopsis thaliana OX=3702 GN=CICDH PE=1 SV=1	45746	Carbamidomethylation; Oxidation (M)	99.2	301.22	29	27	23	24	26	25	16	25	20	26	26	29	14	12	38	29	33	37	26	24	30	21	33	34	35
6524.7	3375.7	5339.9	5430.8	3639.9	2490.9	4656.3	5360.7	4627.7	5121	5859.3	A0A178W7K0	Isocitrate dehydrogenase [NADP] OS=Arabidopsis thaliana OX=3702 GN=AXX17_At1g59590 PE=3 SV=1	45746	Carbamidomethylation; Oxidation (M)	99.2	301.22	29	27	23	24	26	25	16	25	20	26	26	29	14	12	38	29	33	37	26	24	30	21	33	34	35
418.29	18.029	461.43	318	374.69	0	486.79	537.3	775.86	527.65	626.81	P19456	ATPase 2 plasma membrane-type OS=Arabidopsis thaliana OX=3702 GN=AHA2 PE=1 SV=2	104401	Oxidation (M)	99.2	307.45	17	16	12	12	16	13	10	14	11	15	14	13	16	2	37	20	34	40	33	18	36	30	35	26	30
418.29	18.029	461.43	318	374.69	0	486.79	537.3	775.86	527.65	626.81	A0A178UV39	Plasma membrane ATPase OS=Arabidopsis thaliana OX=3702 GN=AXX17_At4g34620 PE=3 SV=1	104401	Oxidation (M)	99.2	307.45	17	16	12	12	16	13	10	14	11	15	14	13	16	2	37	20	34	40	33	18	36	30	35	26	30
418.29	18.029	461.43	318	374.69	0	486.79	537.3	775.86	527.65	626.81	F4JPJ7	Plasma membrane ATPase OS=Arabidopsis thaliana OX=3702 GN=HA2 PE=1 SV=1	108316	Oxidation (M)	99.2	307.45	16	15	11	11	15	13	9	13	10	14	13	12	16	2	37	20	34	40	33	18	36	30	35	26	30
12065	9906.1	11234	11654	9681.6	6963.6	12879	10946	13343	11455	13711	A0A384KFF7	50S ribosomal protein L3 chloroplastic OS=Arabidopsis thaliana OX=3702 GN=AXX17_At2g40490 PE=3 SV=1	29364	Oxidation (M)	99.2	271.1	31	31	31	31	31	31	21	31	31	31	31	31	9	9	30	29	36	32	29	23	30	29	36	29	33
12065	9906.1	11234	11654	9681.6	6963.6	12879	10946	13343	11455	13711	Q0WWY5	50S ribosomal protein L3 OS=Arabidopsis thaliana OX=3702 GN=At2g43030 PE=2 SV=1	29364	Oxidation (M)	99.2	271.1	31	31	31	31	31	31	21	31	31	31	31	31	9	9	30	29	36	32	29	23	30	29	36	29	33
12065	9906.1	11234	11654	9681.6	6963.6	12879	10946	13343	11455	13711	A0A7G2EGI7	(thale cress) hypothetical protein OS=Arabidopsis thaliana OX=3702 GN=AT9943_LOCUS9292 PE=3 SV=1	29350	Oxidation (M)	99.2	271.1	31	31	31	31	31	31	21	31	31	31	31	31	9	9	30	29	36	32	29	23	30	29	36	29	33
12065	9906.1	11234	11654	9681.6	6963.6	12879	10946	13343	11455	13711	Q9SKX4	50S ribosomal protein L3-1 chloroplastic OS=Arabidopsis thaliana OX=3702 GN=RPL3A PE=2 SV=1	29364	Oxidation (M)	99.2	271.1	31	31	31	31	31	31	21	31	31	31	31	31	9	9	30	29	36	32	29	23	30	29	36	29	33
6081.5	4992	5195.6	5545.6	4599.7	3406.8	5282.1	4525.4	6183.9	5824.5	5472.9	A0A178VK42	Tic62 OS=Arabidopsis thaliana OX=3702 GN=AXX17_At3g20090 PE=4 SV=1	68261	Acetylation (N-term)	99.2	302.75	31	21	18	20	23	20	21	23	25	28	23	22	13	13	32	27	28	36	27	24	36	32	34	34	26
6081.5	4992	5195.6	5545.6	4599.7	3406.8	5282.1	4525.4	6183.9	5824.5	5472.9	Q8H0U5	Protein TIC 62 chloroplastic OS=Arabidopsis thaliana OX=3702 GN=TIC62 PE=1 SV=1	68342	Acetylation (N-term)	99.2	302.75	31	21	18	20	23	20	21	23	25	28	23	22	13	13	32	27	28	36	27	24	36	32	34	34	26
6081.5	4992	5195.6	5545.6	4599.7	3406.8	5282.1	4525.4	6183.9	5824.5	5472.9	A0A654F8I7	NAD(P)-bd_dom domain-containing protein OS=Arabidopsis thaliana OX=3702 GN=AN1_LOCUS13301 PE=4 SV=1	68368	Acetylation (N-term)	99.2	302.75	31	21	18	20	23	20	21	23	25	28	23	22	13	13	32	27	28	36	27	24	36	32	34	34	26
6199.9	3283.5	4629.3	6718.5	4330.9	2783.8	5738.9	4452	7339.8	6066.4	5962.1	Q9C9I7	Rieske (2Fe-2S) domain-containing protein OS=Arabidopsis thaliana OX=3702 GN=PSB33 PE=1 SV=1	31727	Carbamidomethylation; Oxidation (M)	99.2	320.21	38	31	26	31	38	31	21	36	32	36	29	36	10	10	30	20	31	33	24	25	28	33	45	36	30
6199.9	3283.5	4629.3	6718.5	4330.9	2783.8	5738.9	4452	7339.8	6066.4	5962.1	A0A654EN28	(thale cress) hypothetical protein OS=Arabidopsis thaliana OX=3702 GN=At1g71500 PE=4 SV=1	31727	Carbamidomethylation; Oxidation (M)	99.2	320.21	38	31	26	31	38	31	21	36	32	36	29	36	10	10	30	20	31	33	24	25	28	33	45	36	30
6199.9	3283.5	4629.3	6718.5	4330.9	2783.8	5738.9	4452	7339.8	6066.4	5962.1	A0A178W9Y8	Rieske domain-containing protein OS=Arabidopsis thaliana OX=3702 GN=AXX17_At1g65710 PE=4 SV=1	31755	Carbamidomethylation; Oxidation (M)	99.2	320.21	38	31	26	31	38	31	21	36	32	36	29	36	10	10	30	20	31	33	24	25	28	33	45	36	30
11107	8457.5	9217.8	15503	10190	7323.2	10389	9716.6	15164	12259	13981	A0A178V4M1	RBP31 OS=Arabidopsis thaliana OX=3702 GN=AXX17_At4g28660 PE=4 SV=1	35787	Oxidation (M)	99.1	210.91	17	14	9	9	17	9	9	14	14	17	14	9	5	5	37	24	24	33	27	25	30	35	39	36	24
11107	8457.5	9217.8	15503	10190	7323.2	10389	9716.6	15164	12259	13981	Q04836	31 kDa ribonucleoprotein chloroplastic OS=Arabidopsis thaliana OX=3702 GN=CP31A PE=1 SV=1	35787	Oxidation (M)	99.1	210.91	17	14	9	9	17	9	9	14	14	17	14	9	5	5	37	24	24	33	27	25	30	35	39	36	24
11107	8457.5	9217.8	15503	10190	7323.2	10389	9716.6	15164	12259	13981	A0A5S9XVY6	(thale cress) hypothetical protein OS=Arabidopsis thaliana OX=3702 GN=AT9943_LOCUS16575 PE=4 SV=1	35815	Oxidation (M)	99.1	210.91	17	14	9	9	17	9	9	14	14	17	14	9	5	5	37	24	24	33	27	25	30	35	39	36	24
11107	8457.5	9217.8	15503	10190	7323.2	10389	9716.6	15164	12259	13981	Q39209	RNA binding protein (Fragment) OS=Arabidopsis thaliana OX=3702 GN=rnp-D PE=2 SV=1	33958	Oxidation (M)	99	210.91	18	15	9	9	18	9	9	15	15	18	15	9	5	5	37	24	24	33	27	25	30	35	39	36	24
1299.2	684.69	992.29	1305.9	809.72	415.15	1050.5	1439.4	1921.8	1296.4	665.66	P11574	V-type proton ATPase subunit B1 OS=Arabidopsis thaliana OX=3702 GN=VHA-B1 PE=2 SV=2	54108	Oxidation (M)	99.2	284.23	32	22	18	20	22	18	14	23	21	32	19	23	15	4	28	21	32	31	27	16	35	34	45	32	33
1299.2	684.69	992.29	1305.9	809.72	415.15	1050.5	1439.4	1921.8	1296.4	665.66	A0A178WGH9	Vacuolar proton pump subunit B OS=Arabidopsis thaliana OX=3702 GN=AXX17_At1g70470 PE=3 SV=1	54108	Oxidation (M)	99.2	284.23	32	22	18	20	22	18	14	23	21	32	19	23	15	4	28	21	32	31	27	16	35	34	45	32	33
1299.2	684.69	992.29	1305.9	809.72	415.15	1050.5	1439.4	1921.8	1296.4	665.66	A0A178WCF6	Vacuolar proton pump subunit B OS=Arabidopsis thaliana OX=3702 GN=AXX17_At1g21230 PE=3 SV=1	54312	Oxidation (M)	99.2	284.23	32	22	18	20	22	18	14	23	21	32	19	23	15	4	28	21	32	31	27	16	35	34	45	32	33
1299.2	684.69	992.29	1305.9	809.72	415.15	1050.5	1439.4	1921.8	1296.4	665.66	Q8W4E2	V-type proton ATPase subunit B3 OS=Arabidopsis thaliana OX=3702 GN=VHA-B3 PE=2 SV=1	54312	Oxidation (M)	99.2	284.23	32	22	18	20	22	18	14	23	21	32	19	23	15	4	28	21	32	31	27	16	35	34	45	32	33
529.01	147.07	274.68	124.39	580.8	0	321.56	261.98	463.14	417.64	530.91	A0A5S9WW91	Fructose-bisphosphate aldolase OS=Arabidopsis thaliana OX=3702 GN=C24_LOCUS7042 PE=3 SV=1	42357	Carbamidomethylation; Oxidation (M)	99.2	222.19	24	16	14	14	12	14	12	12	12	22	14	12	9	6	30	29	36	28	31	29	29	21	34	33	30
529.01	147.07	274.68	124.39	580.8	0	321.56	261.98	463.14	417.64	530.91	Q9ZU52	Fructose-bisphosphate aldolase 3 chloroplastic OS=Arabidopsis thaliana OX=3702 GN=FBA3 PE=1 SV=1	42327	Carbamidomethylation; Oxidation (M)	99.2	222.19	24	16	14	14	12	14	12	12	12	22	14	12	9	6	30	29	36	28	31	29	29	21	34	33	30
529.01	147.07	274.68	124.39	580.8	0	321.56	261.98	463.14	417.64	530.91	A0A178VVW3	Fructose-bisphosphate aldolase OS=Arabidopsis thaliana OX=3702 GN=AXX17_At2g00100 PE=3 SV=1	42327	Carbamidomethylation; Oxidation (M)	99.2	222.19	24	16	14	14	12	14	12	12	12	22	14	12	9	6	30	29	36	28	31	29	29	21	34	33	30
9258.4	4430.1	6994.2	7555	7321.1	6240.9	7528.8	7570.6	7602.4	9017.1	8477.4	A0A654F735	Pectinesterase OS=Arabidopsis thaliana OX=3702 GN=AN1_LOCUS12796 PE=3 SV=1	64256	Oxidation (M)	99.2	285.18	21	16	14	16	16	16	14	16	16	21	18	16	11	11	29	32	26	29	32	29	23	34	26	37	29
9258.4	4430.1	6994.2	7555	7321.1	6240.9	7528.8	7570.6	7602.4	9017.1	8477.4	A0A178VDL9	Pectinesterase OS=Arabidopsis thaliana OX=3702 GN=AXX17_At3g14900 PE=3 SV=1	64198	Oxidation (M)	99.2	285.18	21	16	14	16	16	16	14	16	16	21	18	16	11	11	29	32	26	29	32	29	23	34	26	37	29
9258.4	4430.1	6994.2	7555	7321.1	6240.9	7528.8	7570.6	7602.4	9017.1	8477.4	O49006	Pectinesterase/pectinesterase inhibitor 3 OS=Arabidopsis thaliana OX=3702 GN=PME3 PE=1 SV=2	64256	Oxidation (M)	99.2	285.18	21	16	14	16	16	16	14	16	16	21	18	16	11	11	29	32	26	29	32	29	23	34	26	37	29
9258.4	4430.1	6994.2	7555	7321.1	6240.9	7528.8	7570.6	7602.4	9017.1	8477.4	Q56W36	Pectinesterase OS=Arabidopsis thaliana OX=3702 GN=At3g14310 PE=2 SV=1	41261	Oxidation (M)	99.2	285.18	33	25	22	25	25	25	22	25	25	33	28	25	11	11	29	32	26	29	32	29	23	34	26	37	29
7336.4	7724.5	8049.8	8858.4	7094.1	4902	10259	6368.1	9286.9	8699.2	10483	Q43316	Porphobilinogen deaminase chloroplastic OS=Arabidopsis thaliana OX=3702 GN=HEMC PE=1 SV=1	41043	Carbamidomethylation; Oxidation (M)	99.2	269.87	28	20	23	22	26	23	19	27	22	24	25	28	13	13	26	25	26	35	29	26	34	32	37	26	29
7336.4	7724.5	8049.8	8858.4	7094.1	4902	10259	6368.1	9286.9	8699.2	10483	A0A654FZE6	hydroxymethylbilane synthase OS=Arabidopsis thaliana OX=3702 GN=AN1_LOCUS21651 PE=3 SV=1	41043	Carbamidomethylation; Oxidation (M)	99.2	269.87	28	20	23	22	26	23	19	27	22	24	25	28	13	13	26	25	26	35	29	26	34	32	37	26	29
5785.6	3998.1	4470.1	6558.6	4565.9	1567.1	6432	5858.2	7850.7	5277.7	6951	Q8VYK6	40S ribosomal protein S4-3 OS=Arabidopsis thaliana OX=3702 GN=RPS4D PE=2 SV=2	29816	Oxidation (M)	99.2	256.65	37	29	25	34	34	29	17	34	34	37	34	34	10	10	31	18	20	31	30	17	36	33	33	36	38
5785.6	3998.1	4470.1	6558.6	4565.9	1567.1	6432	5858.2	7850.7	5277.7	6951	A0A178UQ69	40S ribosomal protein S4 OS=Arabidopsis thaliana OX=3702 GN=AXX17_At5g57790 PE=3 SV=1	29816	Oxidation (M)	99.2	256.65	37	29	25	34	34	29	17	34	34	37	34	34	10	10	31	18	20	31	30	17	36	33	33	36	38
5785.6	3998.1	4470.1	6558.6	4565.9	1567.1	6432	5858.2	7850.7	5277.7	6951	A0A5S9Y236	KOW domain-containing protein OS=Arabidopsis thaliana OX=3702 GN=At5g07090 PE=3 SV=1	78490	Oxidation (M)	99.2	256.65	14	11	9	12	12	11	6	12	12	14	12	12	10	10	31	18	20	31	30	17	36	33	33	36	38
5785.6	3998.1	4470.1	6558.6	4565.9	1567.1	6432	5858.2	7850.7	5277.7	6951	A0A7G2F5S5	(thale cress) hypothetical protein OS=Arabidopsis thaliana OX=3702 GN=AT9943_LOCUS18542 PE=3 SV=1	78543	Oxidation (M)	99.2	256.65	14	11	9	12	12	11	6	12	12	14	12	12	10	10	31	18	20	31	30	17	36	33	33	36	38
5785.6	3998.1	4470.1	6558.6	4565.9	1567.1	6432	5858.2	7850.7	5277.7	6951	A0A178VWY7	40S ribosomal protein S4 OS=Arabidopsis thaliana OX=3702 GN=At2g17360 PE=3 SV=1	27636	Oxidation (M)	99.2	256.65	40	31	27	36	36	31	18	36	36	40	36	36	10	10	31	18	20	31	30	17	36	33	33	36	38
5785.6	3998.1	4470.1	6558.6	4565.9	1567.1	6432	5858.2	7850.7	5277.7	6951	A0A5S9WYP6	40S ribosomal protein S4 OS=Arabidopsis thaliana OX=3702 GN=C24_LOCUS7935 PE=3 SV=1	29803	Oxidation (M)	99.2	256.65	37	29	25	34	34	29	17	34	34	37	34	34	10	10	31	18	20	31	30	17	36	33	33	36	38
5785.6	3998.1	4470.1	6558.6	4565.9	1567.1	6432	5858.2	7850.7	5277.7	6951	Q93VH9	40S ribosomal protein S4-1 OS=Arabidopsis thaliana OX=3702 GN=RPS4A PE=2 SV=1	29803	Oxidation (M)	99.2	256.65	37	29	25	34	34	29	17	34	34	37	34	34	10	10	31	18	20	31	30	17	36	33	33	36	38
5785.6	3998.1	4470.1	6558.6	4565.9	1567.1	6432	5858.2	7850.7	5277.7	6951	A0A654ETL4	40S ribosomal protein S4 OS=Arabidopsis thaliana OX=3702 GN=AN1_LOCUS8090 PE=3 SV=1	30831	Oxidation (M)	99.2	256.65	36	28	24	33	33	28	16	33	33	36	33	33	10	10	31	18	20	31	30	17	36	33	33	36	38
5785.6	3998.1	4470.1	6558.6	4565.9	1567.1	6432	5858.2	7850.7	5277.7	6951	F4K5C7	40S ribosomal protein S4 OS=Arabidopsis thaliana OX=3702 GN=At5g07090 PE=3 SV=1	27707	Oxidation (M)	99.2	256.65	40	31	27	36	36	31	18	36	36	40	36	36	10	10	31	18	20	31	30	17	36	33	33	36	38
5785.6	3998.1	4470.1	6558.6	4565.9	1567.1	6432	5858.2	7850.7	5277.7	6951	P49204	40S ribosomal protein S4-2 OS=Arabidopsis thaliana OX=3702 GN=RPS4B PE=2 SV=4	29874	Oxidation (M)	99.2	256.65	37	29	25	34	34	29	17	34	34	37	34	34	10	10	31	18	20	31	30	17	36	33	33	36	38
5785.6	3998.1	4470.1	6558.6	4565.9	1567.1	6432	5858.2	7850.7	5277.7	6951	A0A178UFG0	40S ribosomal protein S4 OS=Arabidopsis thaliana OX=3702 GN=AXX17_At5g06740 PE=3 SV=1	29874	Oxidation (M)	99.2	256.65	37	29	25	34	34	29	17	34	34	37	34	34	10	10	31	18	20	31	30	17	36	33	33	36	38
5785.6	3998.1	4470.1	6558.6	4565.9	1567.1	6432	5858.2	7850.7	5277.7	6951	A0A654FZG2	40S ribosomal protein S4 OS=Arabidopsis thaliana OX=3702 GN=AN1_LOCUS21526 PE=3 SV=1	30143	Oxidation (M)	99.2	256.65	37	28	25	33	33	28	17	33	33	37	33	33	10	10	31	18	20	31	30	17	36	33	33	36	38
4409.6	3141	3742.4	5059.6	3427	2404.2	5842.4	4871.4	5823.2	4586.5	5032	F4I2F8	NADPH-protochlorophyllide oxidoreductase OS=Arabidopsis thaliana OX=3702 GN=POR C PE=1 SV=1	43626	Oxidation (M)	99.2	300.07	29	27	20	27	25	25	16	29	25	25	25	25	11	7	36	15	25	37	21	10	41	36	33	31	38
4409.6	3141	3742.4	5059.6	3427	2404.2	5842.4	4871.4	5823.2	4586.5	5032	A0A384LMN8	NADPH-protochlorophyllide oxidoreductase OS=Arabidopsis thaliana OX=3702 GN=AXX17_At1g02900 PE=3 SV=1	43883	Oxidation (M)	99.2	300.07	29	27	20	27	25	25	16	29	25	25	25	25	11	7	36	15	25	37	21	10	41	36	33	31	38
4409.6	3141	3742.4	5059.6	3427	2404.2	5842.4	4871.4	5823.2	4586.5	5032	Q0WVW0	NADPH-protochlorophyllide oxidoreductase OS=Arabidopsis thaliana OX=3702 GN=At1g03630 PE=2 SV=1	43883	Oxidation (M)	99.2	300.07	29	27	20	27	25	25	16	29	25	25	25	25	11	7	36	15	25	37	21	10	41	36	33	31	38
4409.6	3141	3742.4	5059.6	3427	2404.2	5842.4	4871.4	5823.2	4586.5	5032	O48741	Protochlorophyllide reductase C chloroplastic OS=Arabidopsis thaliana OX=3702 GN=PORC PE=1 SV=1	43883	Oxidation (M)	99.2	300.07	29	27	20	27	25	25	16	29	25	25	25	25	11	7	36	15	25	37	21	10	41	36	33	31	38
932.4	410.85	647.6	2382.4	1746.3	1237.2	877.51	742.05	2300.8	2950.9	2909.6	Q9LDZ0	Heat shock 70 kDa protein 10 mitochondrial OS=Arabidopsis thaliana OX=3702 GN=HSP70-10 PE=1 SV=1	72991	Oxidation (M)	99.2	333.23	28	17	17	15	23	21	19	23	17	26	22	23	17	10	21	22	17	47	36	25	23	16	38	38	39
932.4	410.85	647.6	2382.4	1746.3	1237.2	877.51	742.05	2300.8	2950.9	2909.6	A0A5S9Y3J7	Heat shock 70 kDa protein mitochondrial OS=Arabidopsis thaliana OX=3702 GN=AN1_LOCUS21750 PE=3 SV=1	73005	Oxidation (M)	99.2	333.23	28	17	17	15	23	21	19	23	17	26	22	23	17	10	21	22	17	47	36	25	23	16	38	38	39
932.4	410.85	647.6	2382.4	1746.3	1237.2	877.51	742.05	2300.8	2950.9	2909.6	A0A7G2F688	(thale cress) hypothetical protein OS=Arabidopsis thaliana OX=3702 GN=AT9943_LOCUS18724 PE=3 SV=1	97772	Oxidation (M)	99.2	333.23	21	13	13	11	17	16	14	18	12	19	17	17	17	10	21	22	17	47	36	25	23	16	38	38	39
932.4	410.85	647.6	2382.4	1746.3	1237.2	877.51	742.05	2300.8	2950.9	2909.6	A0A178UPX1	MTHSC70-2 OS=Arabidopsis thaliana OX=3702 GN=AXX17_At5g09130 PE=3 SV=1	100031	Oxidation (M)	99.2	333.23	21	12	12	11	17	15	14	17	12	19	16	17	17	10	21	22	17	47	36	25	23	16	38	38	39
0	97.892	344.19		350.52	163.63	60.572	304.3	551.64	418.86	492.11	A0A178VSN5	Plasma membrane ATPase OS=Arabidopsis thaliana OX=3702 GN=AXX17_At2g14320 PE=3 SV=1	104224	Oxidation (M)	99.2	302.83	16	16	11	11	14	13	10	13	10	14	13	12	15	1	35	16	32	37	32	23	35	27	31	22	31
0	97.892	344.19		350.52	163.63	60.572	304.3	551.64	418.86	492.11	P20649	ATPase 1 plasma membrane-type OS=Arabidopsis thaliana OX=3702 GN=AHA1 PE=1 SV=3	104224	Oxidation (M)	99.2	302.83	16	16	11	11	14	13	10	13	10	14	13	12	15	1	35	16	32	37	32	23	35	27	31	22	31
1483.3	1490.1	2103.2	1481.9	1853.4	1645	2089.7	2088.2	2698.8	2544.5	2727.5	A0A178WM68	FTSH8 OS=Arabidopsis thaliana OX=3702 GN=AXX17_At1g06050 PE=3 SV=1	73197	Oxidation (M)	99.2	289.78	20	19	15	17	20	16	15	20	19	20	20	17	11	5	31	21	24	26	24	24	32	29	40	38	29
1483.3	1490.1	2103.2	1481.9	1853.4	1645	2089.7	2088.2	2698.8	2544.5	2727.5	A0A654E791	(thale cress) hypothetical protein OS=Arabidopsis thaliana OX=3702 GN=AN1_LOCUS704 PE=3 SV=1	73198	Oxidation (M)	99.2	289.78	20	19	15	17	20	16	15	20	19	20	20	17	11	5	31	21	24	26	24	24	32	29	40	38	29
1483.3	1490.1	2103.2	1481.9	1853.4	1645	2089.7	2088.2	2698.8	2544.5	2727.5	Q8W585	ATP-dependent zinc metalloprotease FTSH 8 chloroplastic OS=Arabidopsis thaliana OX=3702 GN=FTSH8 PE=1 SV=1	73198	Oxidation (M)	99.2	289.78	20	19	15	17	20	16	15	20	19	20	20	17	11	5	31	21	24	26	24	24	32	29	40	38	29
237.24	139.63	207.03	653.56	456.51	226.16	405.33	367.79	797.4	580.59	700.22	Q9SGC1	Probable phosphoglucomutase cytoplasmic 2 OS=Arabidopsis thaliana OX=3702 GN=At1g70730 PE=1 SV=1	63482	Oxidation (M)	99.2	316.89	31	24	21	20	26	20	13	25	28	29	27	25	17	8	35	28	21	30	23	17	36	33	32	31	32
237.24	139.63	207.03	653.56	456.51	226.16	405.33	367.79	797.4	580.59	700.22	A0A654EMU1	phosphoglucomutase (alpha-D-glucose-1 6-bisphosphate-dependent) OS=Arabidopsis thaliana OX=3702 GN=AN1_LOCUS6109 PE=3 SV=1	63482	Oxidation (M)	99.2	316.89	31	24	21	20	26	20	13	25	28	29	27	25	17	8	35	28	21	30	23	17	36	33	32	31	32
237.24	139.63	207.03	653.56	456.51	226.16	405.33	367.79	797.4	580.59	700.22	Q0WN31	phosphoglucomutase (alpha-D-glucose-1 6-bisphosphate-dependent) OS=Arabidopsis thaliana OX=3702 GN=At1g70730 PE=2 SV=1	63482	Oxidation (M)	99.2	316.89	31	24	21	20	26	20	13	25	28	29	27	25	17	8	35	28	21	30	23	17	36	33	32	31	32
237.24	139.63	207.03	653.56	456.51	226.16	405.33	367.79	797.4	580.59	700.22	F4I6W4	phosphoglucomutase (alpha-D-glucose-1 6-bisphosphate-dependent) OS=Arabidopsis thaliana OX=3702 GN=PGM2 PE=1 SV=1	72558	Oxidation (M)	99.2	316.89	27	21	18	18	23	18	11	22	24	26	24	22	17	8	35	28	21	30	23	17	36	33	32	31	32
20156	12288	21775	15275	12684	11067	17790	18352	17882	16092	16987	Q9SSS9	ATP synthase subunit delta chloroplastic OS=Arabidopsis thaliana OX=3702 GN=ATPD PE=1 SV=1	25669	Oxidation (M)	99.1	245.58	28	24	23	27	24	23	23	23	27	27	23	23	10	10	33	20	27	30	29	24	31	32	32	30	26
20156	12288	21775	15275	12684	11067	17790	18352	17882	16092	16987	A0A178V1L3	(thale cress) hypothetical protein OS=Arabidopsis thaliana OX=3702 GN=AXX17_At4g10860 PE=3 SV=1	25669	Oxidation (M)	99.1	245.58	28	24	23	27	24	23	23	23	27	27	23	23	10	10	33	20	27	30	29	24	31	32	32	30	26
10500	9809.6	9671.8	1849.6	2597.3	2074.3	11378	8151.5	3667.9	3575.2	2458.4	Q9ZUU4	RNA-binding protein CP29B chloroplastic OS=Arabidopsis thaliana OX=3702 GN=CP29B PE=1 SV=1	30718		99.2	305.98	28	25	18	18	18	18	21	28	24	24	21	18	7	4	44	32	39	16	17	21	49	34	18	23	19
10500	9809.6	9671.8	1849.6	2597.3	2074.3	11378	8151.5	3667.9	3575.2	2458.4	A0A7G2EEE2	(thale cress) hypothetical protein OS=Arabidopsis thaliana OX=3702 GN=AT9943_LOCUS8728 PE=4 SV=1	30746		99.2	305.98	28	25	18	18	18	18	21	28	24	24	21	18	7	4	44	32	39	16	17	21	49	34	18	23	19
10500	9809.6	9671.8	1849.6	2597.3	2074.3	11378	8151.5	3667.9	3575.2	2458.4	A0A5S9X597	29 kDa ribonucleoprotein A chloroplastic OS=Arabidopsis thaliana OX=3702 GN=AN1_LOCUS10181 PE=4 SV=1	30718		99.2	305.98	28	25	18	18	18	18	21	28	24	24	21	18	7	4	44	32	39	16	17	21	49	34	18	23	19
0	50.189				0	23.548		0			Q9LK36	Adenosylhomocysteinase 2 OS=Arabidopsis thaliana OX=3702 GN=SAHH2 PE=2 SV=1	53159	Carbamidomethylation; Oxidation (M)	99.2	243.82	23	15	14	13	15	13	13	16	13	19	13	15	12	2	27	25	31	31	24	27	35	33	28	23	25
0	50.189				0	23.548		0			A0A178VEP9	Adenosylhomocysteinase OS=Arabidopsis thaliana OX=3702 GN=AXX17_At3g25710 PE=3 SV=1	53159	Carbamidomethylation; Oxidation (M)	99.2	243.82	23	15	14	13	15	13	13	16	13	19	13	15	12	2	27	25	31	31	24	27	35	33	28	23	25
			14637	4449.6	4017.7			3557.5	8993.9	7560.1	P42730	Chaperone protein ClpB1 OS=Arabidopsis thaliana OX=3702 GN=CLPB1 PE=1 SV=2	101295	Carbamidomethylation; Oxidation (M)	99.2	353.84	22	1	1	1	22	15	15	1	1	17	17	17	19	17	1	1	1	75	37	31	1	2	42	59	57
			14637	4449.6	4017.7			3557.5	8993.9	7560.1	A0A5S9WUB5	(thale cress) hypothetical protein OS=Arabidopsis thaliana OX=3702 GN=AN1_LOCUS6471 PE=3 SV=1	101295	Carbamidomethylation; Oxidation (M)	99.2	353.84	22	1	1	1	22	15	15	1	1	17	17	17	19	17	1	1	1	75	37	31	1	2	42	59	57
11131	7961.3	11382	9407	8622.5	6424.6	10511	12701	12776	10392	10772	P27521	Chlorophyll a-b binding protein 4 chloroplastic OS=Arabidopsis thaliana OX=3702 GN=LHCA4 PE=1 SV=1	27734		98.8	242.21	21	16	14	16	16	16	14	16	21	21	16	16	4	4	28	17	29	27	24	20	25	34	41	30	31
11131	7961.3	11382	9407	8622.5	6424.6	10511	12701	12776	10392	10772	A0A178VEE6	Chlorophyll a-b binding protein chloroplastic OS=Arabidopsis thaliana OX=3702 GN=AXX17_At3g41460 PE=3 SV=1	27734		98.8	242.21	21	16	14	16	16	16	14	16	21	21	16	16	4	4	28	17	29	27	24	20	25	34	41	30	31
11131	7961.3	11382	9407	8622.5	6424.6	10511	12701	12776	10392	10772	Q9FPI3	Chlorophyll a-b binding protein chloroplastic OS=Arabidopsis thaliana OX=3702 GN=At3g47470 PE=2 SV=1	16729		98.7	242.21	36	26	23	26	26	26	23	26	36	36	26	26	4	4	28	17	29	27	24	20	25	34	41	30	31
693.58	479.88	604.76	157.29	235.32	0	843.64	359.76	387.71	0	981.86	A0A178UPR2	Tubulin beta chain OS=Arabidopsis thaliana OX=3702 GN=AXX17_At5g11980 PE=3 SV=1	50586	Carbamidomethylation; Oxidation (M)	99.2	254.46	28	18	16	18	21	13	9	23	25	26	14	20	12	3	24	24	26	27	27	23	25	29	38	29	33
693.58	479.88	604.76	157.29	235.32	0	843.64	359.76	387.71	0	981.86	Q8GY15	Tubulin beta chain OS=Arabidopsis thaliana OX=3702 GN=At5g12250/MXC9_21 PE=2 SV=1	50614	Carbamidomethylation; Oxidation (M)	99.2	254.46	28	18	16	18	21	13	9	23	25	26	14	20	12	3	24	24	26	27	27	23	25	29	38	29	33
693.58	479.88	604.76	157.29	235.32	0	843.64	359.76	387.71	0	981.86	P29514	Tubulin beta-6 chain OS=Arabidopsis thaliana OX=3702 GN=TUBB6 PE=2 SV=1	50586	Carbamidomethylation; Oxidation (M)	99.2	254.46	28	18	16	18	21	13	9	23	25	26	14	20	12	3	24	24	26	27	27	23	25	29	38	29	33
6821.8	2201.6	5018.7	5968.7	3027.1	1564.3	6891.9	4641.4	5644.7	6731.1	4970.7	A0A178VV72	Glycine cleavage system H protein OS=Arabidopsis thaliana OX=3702 GN=AXX17_At2g31950 PE=3 SV=1	17947	Carbamidomethylation; Oxidation (M)	99	203.33	33	27	22	22	27	33	22	27	27	27	33	33	4	1	34	12	23	39	22	7	32	33	32	35	36
6821.8	2201.6	5018.7	5968.7	3027.1	1564.3	6891.9	4641.4	5644.7	6731.1	4970.7	P25855	Glycine cleavage system H protein 1 mitochondrial OS=Arabidopsis thaliana OX=3702 GN=GDH1 PE=1 SV=1	17947	Carbamidomethylation; Oxidation (M)	99	203.33	33	27	22	22	27	33	22	27	27	27	33	33	4	1	34	12	23	39	22	7	32	33	32	35	36
6821.8	2201.6	5018.7	5968.7	3027.1	1564.3	6891.9	4641.4	5644.7	6731.1	4970.7	A0A7G2EFK6	Glycine cleavage system H protein OS=Arabidopsis thaliana OX=3702 GN=AT9943_LOCUS8553 PE=3 SV=1	14945	Carbamidomethylation; Oxidation (M)	99	203.33	39	33	26	26	33	39	26	33	33	33	39	39	4	1	34	12	23	39	22	7	32	33	32	35	36
1766.6	1794.8	1018.5	2471.2	987.75	1074.9	2267	1226.4	1831.2	1683.4	2330.6	F6M3L4	Pyridoxine biosynthesis protein OS=Arabidopsis thaliana OX=3702 GN=PDX1.3 PE=2 SV=1	33216	Carbamidomethylation; Oxidation (M); Acetylation (N-term)	99.2	294	37	30	29	30	33	27	26	30	24	29	30	33	12	8	27	30	26	37	22	18	32	20	30	31	31
1766.6	1794.8	1018.5	2471.2	987.75	1074.9	2267	1226.4	1831.2	1683.4	2330.6	Q8L940	Pyridoxal 5'-phosphate synthase subunit PDX1.3 OS=Arabidopsis thaliana OX=3702 GN=PDX13 PE=1 SV=2	33216	Carbamidomethylation; Oxidation (M); Acetylation (N-term)	99.2	294	37	30	29	30	33	27	26	30	24	29	30	33	12	8	27	30	26	37	22	18	32	20	30	31	31
1766.6	1794.8	1018.5	2471.2	987.75	1074.9	2267	1226.4	1831.2	1683.4	2330.6	A0A384KHQ3	RSR4 OS=Arabidopsis thaliana OX=3702 GN=AXX17_At5g00450 PE=3 SV=1	33216	Carbamidomethylation; Oxidation (M); Acetylation (N-term)	99.2	294	37	30	29	30	33	27	26	30	24	29	30	33	12	8	27	30	26	37	22	18	32	20	30	31	31
3762	1715.5	3117.7	3694.1	2239	979.38	4310.8	3801.5	4528	3928.6	3956.5	Q0WLF5	Cysteine synthase OS=Arabidopsis thaliana OX=3702 GN=At4g14880 PE=2 SV=1	53013	Carbamidomethylation; Oxidation (M)	99.2	277.71	20	17	17	17	17	17	17	17	17	17	19	18	10	8	30	16	25	30	23	17	27	31	30	38	31
3762	1715.5	3117.7	3694.1	2239	979.38	4310.8	3801.5	4528	3928.6	3956.5	A0A7G2EY35	Cysteine synthase OS=Arabidopsis thaliana OX=3702 GN=AT9943_LOCUS15627 PE=3 SV=1	33791	Carbamidomethylation; Oxidation (M)	99.2	277.71	30	26	25	25	26	26	25	26	26	26	28	27	10	8	30	16	25	30	23	17	27	31	30	38	31
3762	1715.5	3117.7	3694.1	2239	979.38	4310.8	3801.5	4528	3928.6	3956.5	P47998	Cysteine synthase 1 OS=Arabidopsis thaliana OX=3702 GN=OASA1 PE=1 SV=2	33805	Carbamidomethylation; Oxidation (M)	99.2	277.71	30	26	25	25	26	26	25	26	26	26	28	27	10	8	30	16	25	30	23	17	27	31	30	38	31
3762	1715.5	3117.7	3694.1	2239	979.38	4310.8	3801.5	4528	3928.6	3956.5	A0A178V054	Cysteine synthase OS=Arabidopsis thaliana OX=3702 GN=AXX17_At4g17220 PE=3 SV=1	33805	Carbamidomethylation; Oxidation (M)	99.2	277.71	30	26	25	25	26	26	25	26	26	26	28	27	10	8	30	16	25	30	23	17	27	31	30	38	31
7701.9	5477.3	7891	8184.1	7893.7	7368	8349.8	7232.3	8363.1	7855.5	7970.2	A0A178WA14	H(+)-exporting diphosphatase OS=Arabidopsis thaliana OX=3702 GN=AXX17_At1g16450 PE=3 SV=1	80820	Carbamidomethylation; Oxidation (M)	99.2	320.3	19	14	11	13	15	13	13	15	12	14	16	16	15	15	32	22	26	28	27	21	21	21	34	31	34
7701.9	5477.3	7891	8184.1	7893.7	7368	8349.8	7232.3	8363.1	7855.5	7970.2	P31414	Pyrophosphate-energized vacuolar membrane proton pump 1 OS=Arabidopsis thaliana OX=3702 GN=AVP1 PE=1 SV=1	80820	Carbamidomethylation; Oxidation (M)	99.2	320.3	19	14	11	13	15	13	13	15	12	14	16	16	15	15	32	22	26	28	27	21	21	21	34	31	34
10284	8257	9591.5	9754.1	6330.2	6882.9	10427	8813.7	10099	9944.3	10946	P48491	Triosephosphate isomerase cytosolic OS=Arabidopsis thaliana OX=3702 GN=CTIMC PE=1 SV=2	27169	Carbamidomethylation; Oxidation (M)	99.1	274.86	34	34	24	30	30	34	19	30	30	30	30	34	8	8	33	26	30	27	26	17	29	24	29	29	25
10284	8257	9591.5	9754.1	6330.2	6882.9	10427	8813.7	10099	9944.3	10946	A0A178VM57	(thale cress) hypothetical protein OS=Arabidopsis thaliana OX=3702 GN=AXX17_At3g50030 PE=3 SV=1	27169	Carbamidomethylation; Oxidation (M)	99.1	274.86	34	34	24	30	30	34	19	30	30	30	30	34	8	8	33	26	30	27	26	17	29	24	29	29	25
26796	15904	24745	30747	23572	17093	22395	28047	28393	27893	30723	A0A1B1W4X2	Photosystem II reaction center protein H OS=Arabidopsis thaliana OX=3702 GN=psbH PE=3 SV=1	7702	Acetylation (N-term)	84.4	133.16	29	29	29	29	29	29	29	29	29	29	29	29	2	2	23	19	24	32	30	22	29	28	29	24	32
26796	15904	24745	30747	23572	17093	22395	28047	28393	27893	30723	P56780	Photosystem II reaction center protein H OS=Arabidopsis thaliana OX=3702 GN=psbH PE=1 SV=2	7702	Acetylation (N-term)	84.4	133.16	29	29	29	29	29	29	29	29	29	29	29	29	2	2	23	19	24	32	30	22	29	28	29	24	32
5997.5	5274.3	5661.2	5956.7	5384.4	5101	6246.6	5206.3	6493.9	6223.4	6922.2	Q9ZP06	Malate dehydrogenase 1 mitochondrial OS=Arabidopsis thaliana OX=3702 GN=At1g53240 PE=1 SV=1	35804	Oxidation (M)	99.1	243.05	19	16	13	13	16	13	13	19	19	19	16	19	6	6	21	20	22	25	28	25	25	31	36	26	32
5997.5	5274.3	5661.2	5956.7	5384.4	5101	6246.6	5206.3	6493.9	6223.4	6922.2	A0A178WFE8	Malate dehydrogenase OS=Arabidopsis thaliana OX=3702 GN=AXX17_At1g47550 PE=3 SV=1	35776	Oxidation (M)	99.1	243.05	19	16	13	13	16	13	13	19	19	19	16	19	6	6	21	20	22	25	28	25	25	31	36	26	32
5997.5	5274.3	5661.2	5956.7	5384.4	5101	6246.6	5206.3	6493.9	6223.4	6922.2	A0A5S9WP88	Malate dehydrogenase OS=Arabidopsis thaliana OX=3702 GN=C24_LOCUS4327 PE=3 SV=1	35790	Oxidation (M)	99.1	243.05	19	16	13	13	16	13	13	19	19	19	16	19	6	6	21	20	22	25	28	25	25	31	36	26	32
5997.5	5274.3	5661.2	5956.7	5384.4	5101	6246.6	5206.3	6493.9	6223.4	6922.2	A0A654EJR6	Malate dehydrogenase OS=Arabidopsis thaliana OX=3702 GN=AN1_LOCUS4440 PE=3 SV=1	35819	Oxidation (M)	99.1	243.05	19	16	13	13	16	13	13	19	19	19	16	19	6	6	21	20	22	25	28	25	25	31	36	26	32
147.09	66.171	120.18	378.54	107.38	14.133	308.76	330.11	313.67	41.654	372.67	A0A7G2F713	Vacuolar proton pump subunit B OS=Arabidopsis thaliana OX=3702 GN=AT9943_LOCUS17857 PE=3 SV=1	53504	Oxidation (M)	99.2	270.78	30	19	16	17	22	18	18	21	21	28	19	21	13	2	23	17	25	29	22	16	30	31	39	28	30
147.09	66.171	120.18	378.54	107.38	14.133	308.76	330.11	313.67	41.654	372.67	Q9SZN1	V-type proton ATPase subunit B2 OS=Arabidopsis thaliana OX=3702 GN=VHA-B2 PE=1 SV=1	54305	Oxidation (M)	99.2	270.78	30	19	15	17	22	17	17	20	20	28	18	20	13	2	23	17	25	29	22	16	30	31	39	28	30
147.09	66.171	120.18	378.54	107.38	14.133	308.76	330.11	313.67	41.654	372.67	A0A178V0N0	Vacuolar proton pump subunit B OS=Arabidopsis thaliana OX=3702 GN=AXX17_At4g43850 PE=3 SV=1	54305	Oxidation (M)	99.2	270.78	30	19	15	17	22	17	17	20	20	28	18	20	13	2	23	17	25	29	22	16	30	31	39	28	30
147.09	66.171	120.18	378.54	107.38	14.133	308.76	330.11	313.67	41.654	372.67	F4JTQ0	Vacuolar proton pump subunit B OS=Arabidopsis thaliana OX=3702 GN=VAB2 PE=1 SV=1	55178	Oxidation (M)	99.2	270.78	29	19	15	17	21	17	17	20	20	27	18	20	13	2	23	17	25	29	22	16	30	31	39	28	30
582.4	703.31	660.48	702.79	554.63	0	561.37		590.54	360.49	872.75	Q9FVT2	Probable elongation factor 1-gamma 2 OS=Arabidopsis thaliana OX=3702 GN=At1g57720 PE=1 SV=1	46400	Carbamidomethylation; Oxidation (M); Acetylation (N-term)	99.2	317.29	31	31	26	29	31	28	16	29	26	31	28	29	12	1	23	22	27	33	17	20	30	27	33	29	28
582.4	703.31	660.48	702.79	554.63	0	561.37		590.54	360.49	872.75	A0A178WGF2	Elongation factor 1-gamma 2 OS=Arabidopsis thaliana OX=3702 GN=AXX17_At1g51760 PE=4 SV=1	46400	Carbamidomethylation; Oxidation (M); Acetylation (N-term)	99.2	317.29	31	31	26	29	31	28	16	29	26	31	28	29	12	1	23	22	27	33	17	20	30	27	33	29	28
											A0A5S9WS98	Elongation factor 1-gamma 2 OS=Arabidopsis thaliana OX=3702 GN=C24_LOCUS4726 PE=4 SV=1	46382	Carbamidomethylation; Oxidation (M); Acetylation (N-term)	99.2	316.71	31	31	26	29	29	28	14	27	28	31	28	29	12	0	23	21	28	30	17	19	29	29	33	30	30
3449.3	2348.4	2693	4598.1	2905.5	1162.7	2895.6	3395.3	7118.6	3976.3	4939	Q96291	2-Cys peroxiredoxin BAS1 chloroplastic OS=Arabidopsis thaliana OX=3702 GN=BAS1 PE=1 SV=2	29092		99.1	237.92	24	17	17	14	24	14	17	14	24	24	17	24	7	4	27	29	25	30	19	20	19	31	32	25	30
3449.3	2348.4	2693	4598.1	2905.5	1162.7	2895.6	3395.3	7118.6	3976.3	4939	A0A178VJT2	thioredoxin-dependent peroxiredoxin OS=Arabidopsis thaliana OX=3702 GN=AXX17_At3g11560 PE=4 SV=1	29092		99.1	237.92	24	17	17	14	24	14	17	14	24	24	17	24	7	4	27	29	25	30	19	20	19	31	32	25	30
1814.2	1211.3	1410.1	1910.4	1499.2	783.22	2480.6	1642.8	2215.9	1523.9	1888.9	A0A178UAH8	Ribos_L4_asso_C domain-containing protein OS=Arabidopsis thaliana OX=3702 GN=AXX17_At5g02040 PE=3 SV=1	44722	Carbamidomethylation; Oxidation (M)	99.2	276.85	23	20	19	19	23	19	17	20	23	19	19	20	12	6	25	26	22	34	24	21	35	22	27	22	29
1814.2	1211.3	1410.1	1910.4	1499.2	783.22	2480.6	1642.8	2215.9	1523.9	1888.9	Q8GYH3	Putative 60S ribosomal protein OS=Arabidopsis thaliana OX=3702 GN=At5g02870/F9G14_180 PE=2 SV=1	44725	Carbamidomethylation; Oxidation (M)	99.2	276.85	23	20	19	19	23	19	17	20	23	19	19	20	12	6	25	26	22	34	24	21	35	22	27	22	29
1814.2	1211.3	1410.1	1910.4	1499.2	783.22	2480.6	1642.8	2215.9	1523.9	1888.9	P49691	60S ribosomal protein L4-2 OS=Arabidopsis thaliana OX=3702 GN=RPL4D PE=1 SV=2	44722	Carbamidomethylation; Oxidation (M)	99.2	276.85	23	20	19	19	23	19	17	20	23	19	19	20	12	6	25	26	22	34	24	21	35	22	27	22	29
4312.9	2647.8	3988	4369.8	3113.9	1672.6	5174.7	4372.5	5298.5	4522.6	4899.1	A0A1B1W4Y0	50S ribosomal protein L14 chloroplastic OS=Arabidopsis thaliana OX=3702 GN=rpl14 PE=3 SV=1	13582	Oxidation (M)	99.1	239.74	47	41	41	41	47	41	41	41	41	41	41	41	6	6	22	21	27	20	23	17	37	25	36	29	30
4312.9	2647.8	3988	4369.8	3113.9	1672.6	5174.7	4372.5	5298.5	4522.6	4899.1	P56792	50S ribosomal protein L14 chloroplastic OS=Arabidopsis thaliana OX=3702 GN=rpl14 PE=3 SV=1	13582	Oxidation (M)	99.1	239.74	47	41	41	41	47	41	41	41	41	41	41	41	6	6	22	21	27	20	23	17	37	25	36	29	30
21505	15213	16043	17360	17200	16339	15292	17014	18912	17814	22431	A0A219HZH3	Glucose-6-phosphate/phosphate translocator-like protein OS=Arabidopsis thaliana OX=3702 GN=APE2 PE=1 SV=1	43494	Acetylation (N-term)	98.8	146.23	9	6	4	6	9	6	6	6	6	6	6	4	4	1	30	22	19	24	24	26	19	34	27	34	26
21505	15213	16043	17360	17200	16339	15292	17014	18912	17814	22431	Q9ZSR7	Triose phosphate/phosphate translocator TPT chloroplastic OS=Arabidopsis thaliana OX=3702 GN=TPT PE=1 SV=1	44633	Acetylation (N-term)	98.8	146.23	9	6	3	6	9	6	6	6	6	6	6	3	4	1	30	22	19	24	24	26	19	34	27	34	26
21505	15213	16043	17360	17200	16339	15292	17014	18912	17814	22431	A0A5S9YBI1	TPT domain-containing protein OS=Arabidopsis thaliana OX=3702 GN=C24_LOCUS24674 PE=4 SV=1	44633	Acetylation (N-term)	98.8	146.23	9	6	3	6	9	6	6	6	6	6	6	3	4	1	30	22	19	24	24	26	19	34	27	34	26
21505	15213	16043	17360	17200	16339	15292	17014	18912	17814	22431	A0A219I0W9	Glucose-6-phosphate/phosphate translocator-like protein OS=Arabidopsis thaliana OX=3702 GN=APE2 PE=1 SV=1	45237	Acetylation (N-term)	98.8	146.23	9	6	3	6	9	6	6	6	6	6	6	3	4	1	30	22	19	24	24	26	19	34	27	34	26
1443.7	1698.7	1222.4	1862.2	849	1099.6	2020	1497.1	1627.5	1239.7	2005.6	A0A178UQN5	(thale cress) hypothetical protein OS=Arabidopsis thaliana OX=3702 GN=AXX17_At5g45700 PE=1 SV=1	37999	Oxidation (M)	99.2	288.17	30	27	30	24	27	24	19	27	24	21	27	21	10	6	28	25	27	23	22	17	34	25	24	25	31
1443.7	1698.7	1222.4	1862.2	849	1099.6	2020	1497.1	1627.5	1239.7	2005.6	Q9LVT8	RGG repeats nuclear RNA binding protein C OS=Arabidopsis thaliana OX=3702 GN=RGGC PE=1 SV=1	37999	Oxidation (M)	99.2	288.17	30	27	30	24	27	24	19	27	24	21	27	21	10	6	28	25	27	23	22	17	34	25	24	25	31
4975	3829.8	2880.7	4755.6	3711.5	2619.3	4511	3879.3	4896.9	5388.9	5571	A0A178UIU8	Mitochondrial dicarboxylate/tricarboxylate transporter DTC OS=Arabidopsis thaliana OX=3702 GN=AXX17_At5g19680 PE=3 SV=1	31912	Carbamidomethylation; Oxidation (M)	99.2	288.16	39	34	30	21	34	27	20	34	34	34	37	39	10	10	31	25	16	26	23	14	30	21	26	32	36
4975	3829.8	2880.7	4755.6	3711.5	2619.3	4511	3879.3	4896.9	5388.9	5571	Q9C5M0	Mitochondrial dicarboxylate/tricarboxylate transporter DTC OS=Arabidopsis thaliana OX=3702 GN=DTC PE=1 SV=1	31912	Carbamidomethylation; Oxidation (M)	99.2	288.16	39	34	30	21	34	27	20	34	34	34	37	39	10	10	31	25	16	26	23	14	30	21	26	32	36
8402.5	5800.8	6554	8403	6021.1	4306.3	8291.4	5996.1	7740.8	6534.6	8660.1	A0A178VFT9	(thale cress) hypothetical protein OS=Arabidopsis thaliana OX=3702 GN=AXX17_At3g28030 PE=3 SV=1	29707	Carbamidomethylation; Oxidation (M)	99.2	261.09	38	27	22	27	30	25	21	27	22	33	25	32	12	12	33	27	25	25	17	17	28	26	26	28	27
8402.5	5800.8	6554	8403	6021.1	4306.3	8291.4	5996.1	7740.8	6534.6	8660.1	P25873	50S ribosomal protein L15 chloroplastic OS=Arabidopsis thaliana OX=3702 GN=RPL15 PE=1 SV=2	29707	Carbamidomethylation; Oxidation (M)	99.2	261.09	38	27	22	27	30	25	21	27	22	33	25	32	12	12	33	27	25	25	17	17	28	26	26	28	27
1737.6	579.95	1475.4	1514.5	1196.2	763.53	2742.3	2256.5	4124.8	2263.1	2294.7	A0A654F154	NAD(P)-bd_dom domain-containing protein OS=Arabidopsis thaliana OX=3702 GN=AN1_LOCUS10225 PE=4 SV=1	34880	Carbamidomethylation	99.2	278.09	27	19	13	16	22	16	13	19	19	25	22	22	9	7	26	18	22	26	25	17	27	28	37	23	30
1737.6	579.95	1475.4	1514.5	1196.2	763.53	2742.3	2256.5	4124.8	2263.1	2294.7	O80934	Uncharacterized protein At2g37660 chloroplastic OS=Arabidopsis thaliana OX=3702 GN=At2g37660 PE=1 SV=2	34880	Carbamidomethylation	99.2	278.09	27	19	13	16	22	16	13	19	19	25	22	22	9	7	26	18	22	26	25	17	27	28	37	23	30
1737.6	579.95	1475.4	1514.5	1196.2	763.53	2742.3	2256.5	4124.8	2263.1	2294.7	A0A178VNV6	NAD(P)-bd_dom domain-containing protein OS=Arabidopsis thaliana OX=3702 GN=AXX17_At2g34470 PE=4 SV=1	34852	Carbamidomethylation	99.2	278.09	27	19	13	16	22	16	13	19	19	25	22	22	9	7	26	18	22	26	25	17	27	28	37	23	30
1737.6	579.95	1475.4	1514.5	1196.2	763.53	2742.3	2256.5	4124.8	2263.1	2294.7	A0A5S9X4W6	NAD(P)-bd_dom domain-containing protein OS=Arabidopsis thaliana OX=3702 GN=C24_LOCUS10071 PE=4 SV=1	34913	Carbamidomethylation	99.2	278.09	27	19	13	16	22	16	13	19	19	25	22	22	9	7	26	18	22	26	25	17	27	28	37	23	30
6536.3	6685.8	6257.3	5624.9	3845.5	3191.7	7672.3	5226.6	5285.3	4250.2	5201.7	A0A178WCD2	Elongation factor G chloroplastic OS=Arabidopsis thaliana OX=3702 GN=AXX17_At1g56040 PE=3 SV=1	86058	Carbamidomethylation; Oxidation (M)	99.2	275.36	22	12	11	14	16	11	8	17	13	19	12	13	17	17	28	26	28	27	15	18	31	27	33	23	20
6536.3	6685.8	6257.3	5624.9	3845.5	3191.7	7672.3	5226.6	5285.3	4250.2	5201.7	A0A654EW54	Elongation factor G chloroplastic OS=Arabidopsis thaliana OX=3702 GN=AN1_LOCUS5274 PE=3 SV=1	86067	Carbamidomethylation; Oxidation (M)	99.2	275.36	22	12	11	14	16	11	8	17	13	19	12	13	17	17	28	26	28	27	15	18	31	27	33	23	20
6536.3	6685.8	6257.3	5624.9	3845.5	3191.7	7672.3	5226.6	5285.3	4250.2	5201.7	Q9SI75	Elongation factor G chloroplastic OS=Arabidopsis thaliana OX=3702 GN=CPEFG PE=1 SV=1	86058	Carbamidomethylation; Oxidation (M)	99.2	275.36	22	12	11	14	16	11	8	17	13	19	12	13	17	17	28	26	28	27	15	18	31	27	33	23	20
6536.3	6685.8	6257.3	5624.9	3845.5	3191.7	7672.3	5226.6	5285.3	4250.2	5201.7	A0A7G2E2A9	Elongation factor G chloroplastic OS=Arabidopsis thaliana OX=3702 GN=AT9943_LOCUS4447 PE=3 SV=1	94936	Carbamidomethylation; Oxidation (M)	99.2	275.36	20	11	10	13	14	10	8	16	12	17	11	11	17	17	28	26	28	27	15	18	31	27	33	23	20
10036	8035.7	5365.8	6361.9	7625.7	5802.3	9350.9	5562.2	9710.5	8521.9	9144.2	P56798	30S ribosomal protein S3 chloroplastic OS=Arabidopsis thaliana OX=3702 GN=rps3 PE=3 SV=1	25188	Carbamidomethylation; Oxidation (M)	99.2	251.5	36	33	35	36	28	33	28	36	32	36	36	36	11	11	29	24	27	20	25	21	27	25	28	24	26
10036	8035.7	5365.8	6361.9	7625.7	5802.3	9350.9	5562.2	9710.5	8521.9	9144.2	A0A8F5GFQ7	30S ribosomal protein S3 chloroplastic OS=Arabidopsis thaliana OX=3702 GN=rps3 PE=3 SV=1	25188	Carbamidomethylation; Oxidation (M)	99.2	251.5	36	33	35	36	28	33	28	36	32	36	36	36	11	11	29	24	27	20	25	21	27	25	28	24	26
10036	8035.7	5365.8	6361.9	7625.7	5802.3	9350.9	5562.2	9710.5	8521.9	9144.2	A0A1B1W4X6	30S ribosomal protein S3 chloroplastic OS=Arabidopsis thaliana OX=3702 GN=rps3 PE=3 SV=1	25188	Carbamidomethylation; Oxidation (M)	99.2	251.5	36	33	35	36	28	33	28	36	32	36	36	36	11	11	29	24	27	20	25	21	27	25	28	24	26
10644	7920	9791.8	12003	8847.1	5627.1	10434	10565	11783	11383	13303	A0A5S9XFZ9	thioredoxin-dependent peroxiredoxin OS=Arabidopsis thaliana OX=3702 GN=AT9943_LOCUS12073 PE=4 SV=1	23678		99.1	237.42	31	21	29	26	24	24	21	22	24	22	21	21	8	8	29	21	19	30	25	23	25	22	27	27	28
10644	7920	9791.8	12003	8847.1	5627.1	10434	10565	11783	11383	13303	Q9LU86	Peroxiredoxin Q chloroplastic OS=Arabidopsis thaliana OX=3702 GN=PRXQ PE=1 SV=1	23678		99.1	237.42	31	21	29	26	24	24	21	22	24	22	21	21	8	8	29	21	19	30	25	23	25	22	27	27	28
10644	7920	9791.8	12003	8847.1	5627.1	10434	10565	11783	11383	13303	A0A178VD11	thioredoxin-dependent peroxiredoxin OS=Arabidopsis thaliana OX=3702 GN=AXX17_At3g28170 PE=4 SV=1	23765		99.1	237.42	31	21	29	26	24	24	21	22	24	22	21	21	8	8	29	21	19	30	25	23	25	22	27	27	28
725.8	829.23	796.92	703.83	510.16	823.28	652.48	650.81	611.71	816.26	793.61	A0A654F9D0	Dihydrolipoyl dehydrogenase OS=Arabidopsis thaliana OX=3702 GN=AN1_LOCUS13117 PE=3 SV=1	53986	Carbamidomethylation; Oxidation (M)	99.2	257.99	22	13	15	15	19	15	17	13	15	14	15	15	11	4	26	25	26	27	24	26	24	23	24	27	24
725.8	829.23	796.92	703.83	510.16	823.28	652.48	650.81	611.71	816.26	793.61	Q9M5K2	Dihydrolipoyl dehydrogenase 2 mitochondrial OS=Arabidopsis thaliana OX=3702 GN=LPD2 PE=1 SV=1	53986	Carbamidomethylation; Oxidation (M)	99.2	257.99	22	13	15	15	19	15	17	13	15	14	15	15	11	4	26	25	26	27	24	26	24	23	24	27	24
4958.2	3734.6	4994	3629.7	3478.5	2435.1	4746.3	5222.9	5873	5796	4609.7	Q0WW95	Cysteine synthase OS=Arabidopsis thaliana OX=3702 GN=At2g43750 PE=2 SV=1	41656	Carbamidomethylation; Oxidation (M); Acetylation (N-term)	99.2	331.69	38	19	18	20	19	14	16	17	24	38	20	23	12	11	30	23	22	25	19	21	23	29	34	22	27
4958.2	3734.6	4994	3629.7	3478.5	2435.1	4746.3	5222.9	5873	5796	4609.7	A0A384KAY1	Cysteine synthase OS=Arabidopsis thaliana OX=3702 GN=AXX17_At2g41270 PE=3 SV=1	41656	Carbamidomethylation; Oxidation (M); Acetylation (N-term)	99.2	331.69	38	19	18	20	19	14	16	17	24	38	20	23	12	11	30	23	22	25	19	21	23	29	34	22	27
4958.2	3734.6	4994	3629.7	3478.5	2435.1	4746.3	5222.9	5873	5796	4609.7	P47999	Cysteine synthase chloroplastic/chromoplastic OS=Arabidopsis thaliana OX=3702 GN=OASB PE=1 SV=2	41656	Carbamidomethylation; Oxidation (M); Acetylation (N-term)	99.2	331.69	38	19	18	20	19	14	16	17	24	38	20	23	12	11	30	23	22	25	19	21	23	29	34	22	27
1254.4	990.22	1282.5	1363.2	1082.9	892.41	1473.3	1403.4	2006.4	1713.1	1594.5	A0A178UA42	(thale cress) hypothetical protein OS=Arabidopsis thaliana OX=3702 GN=AXX17_At5g35800 PE=3 SV=1	28606	Oxidation (M); Acetylation (N-term)	99.2	274.85	42	32	21	35	32	29	18	35	39	36	32	35	12	4	26	12	24	19	20	16	30	28	35	28	35
1254.4	990.22	1282.5	1363.2	1082.9	892.41	1473.3	1403.4	2006.4	1713.1	1594.5	P42644	14-3-3-like protein GF14 psi OS=Arabidopsis thaliana OX=3702 GN=GRF3 PE=1 SV=2	28606	Oxidation (M); Acetylation (N-term)	99.2	274.85	42	32	21	35	32	29	18	35	39	36	32	35	12	4	26	12	24	19	20	16	30	28	35	28	35
1089.5	490.46	539.66	679.69	473.86	60.451	1079.5	367.97	344.58	509.59	450.45	A0A7G2F3S0	(thale cress) hypothetical protein OS=Arabidopsis thaliana OX=3702 GN=AT9943_LOCUS17803 PE=3 SV=1	72700	Oxidation (M)	99.2	303.25	28	21	19	15	23	23	13	23	17	24	23	21	15	8	25	24	14	39	30	15	25	15	28	28	26
1089.5	490.46	539.66	679.69	473.86	60.451	1079.5	367.97	344.58	509.59	450.45	A0A178V4S0	MtHsc70-1 OS=Arabidopsis thaliana OX=3702 GN=AXX17_At4g43220 PE=3 SV=1	73075	Oxidation (M)	99.2	303.25	27	21	19	15	23	23	13	23	17	24	23	21	15	8	25	24	14	39	30	15	25	15	28	28	26
1089.5	490.46	539.66	679.69	473.86	60.451	1079.5	367.97	344.58	509.59	450.45	Q8GUM2	Heat shock 70 kDa protein 9 mitochondrial OS=Arabidopsis thaliana OX=3702 GN=HSP70-9 PE=1 SV=1	73075	Oxidation (M)	99.2	303.25	27	21	19	15	23	23	13	23	17	24	23	21	15	8	25	24	14	39	30	15	25	15	28	28	26
10588	6575.7	9429.8	10223	7896.1	4939.5	9807.3	9873.8	11867	10711	11545	O48737	Thioredoxin M1 chloroplastic OS=Arabidopsis thaliana OX=3702 GN=At1g03680 PE=1 SV=1	19665	Oxidation (M)	98.8	260.01	27	27	21	26	27	26	26	27	27	27	27	26	6	6	29	17	22	28	21	16	25	22	27	27	35
10588	6575.7	9429.8	10223	7896.1	4939.5	9807.3	9873.8	11867	10711	11545	A0A178W6J8	TRX-M1 OS=Arabidopsis thaliana OX=3702 GN=AXX17_At1g02940 PE=4 SV=1	19665	Oxidation (M)	98.8	260.01	27	27	21	26	27	26	26	27	27	27	27	26	6	6	29	17	22	28	21	16	25	22	27	27	35
973.63	678.52	871.04	1106.9	867.68	459.95	1249.7	924.67	1177	1040.3	1160.1	A0A178VS26	(thale cress) hypothetical protein OS=Arabidopsis thaliana OX=3702 GN=AXX17_At2g32810 PE=3 SV=1	16257	Oxidation (M)	99	239.02	40	26	24	26	40	26	24	26	40	40	26	26	6	1	24	20	22	31	20	27	22	20	33	26	23
973.63	678.52	871.04	1106.9	867.68	459.95	1249.7	924.67	1177	1040.3	1160.1	Q9SIH0	40S ribosomal protein S14-1 OS=Arabidopsis thaliana OX=3702 GN=RPS14A PE=1 SV=1	16257	Oxidation (M)	99	239.02	40	26	24	26	40	26	24	26	40	40	26	26	6	1	24	20	22	31	20	27	22	20	33	26	23
973.63	678.52	871.04	1106.9	867.68	459.95	1249.7	924.67	1177	1040.3	1160.1	A0A654EZB7	40S ribosomal protein S14 OS=Arabidopsis thaliana OX=3702 GN=AN1_LOCUS10068 PE=3 SV=1	17106	Oxidation (M)	99	239.02	38	25	23	25	38	25	23	25	38	38	25	25	6	1	24	20	22	31	20	27	22	20	33	26	23
1645.8	768.9	1015.5	1317.9	933.91	696.87	1325.7	1539	1549.5	1579	1506.3	P32961	Nitrilase 1 OS=Arabidopsis thaliana OX=3702 GN=NIT1 PE=1 SV=2	38152	Carbamidomethylation; Oxidation (M); Acetylation (N-term)	99.1	287.7	25	22	21	19	22	19	19	19	22	25	20	22	10	2	27	22	14	25	17	24	27	33	27	23	28
1645.8	768.9	1015.5	1317.9	933.91	696.87	1325.7	1539	1549.5	1579	1506.3	C0SVD5	Uncharacterized protein At3g44310 (Fragment) OS=Arabidopsis thaliana OX=3702 GN=At3g44310 PE=2 SV=1	38152	Carbamidomethylation; Oxidation (M); Acetylation (N-term)	99.1	287.7	25	22	21	19	22	19	19	19	22	25	20	22	10	2	27	22	14	25	17	24	27	33	27	23	28
1645.8	768.9	1015.5	1317.9	933.91	696.87	1325.7	1539	1549.5	1579	1506.3	A0A384KJ08	NITI OS=Arabidopsis thaliana OX=3702 GN=AXX17_At3g37910 PE=3 SV=1	38152	Carbamidomethylation; Oxidation (M); Acetylation (N-term)	99.1	287.7	25	22	21	19	22	19	19	19	22	25	20	22	10	2	27	22	14	25	17	24	27	33	27	23	28
1645.8	768.9	1015.5	1317.9	933.91	696.87	1325.7	1539	1549.5	1579	1506.3	Q944K7	AT3g44310/T10D17_100 OS=Arabidopsis thaliana OX=3702 PE=2 SV=1	38178	Carbamidomethylation; Oxidation (M); Acetylation (N-term)	99.1	287.7	25	22	21	19	22	19	19	19	22	25	20	22	10	2	27	22	14	25	17	24	27	33	27	23	28
465.91	291.98	546.65	57.105	0		450.8	0	194.7	256.79	457.9	A0A178VB65	Clathrin heavy chain OS=Arabidopsis thaliana OX=3702 GN=AXX17_At3g08110 PE=3 SV=1	193270	Carbamidomethylation; Oxidation (M); Acetylation (N-term)	99.2	302.46	12	10	8	8	10	10	5	9	7	8	9	11	17	3	27	18	20	26	24	13	25	22	21	29	38
465.91	291.98	546.65	57.105	0		450.8	0	194.7	256.79	457.9	Q0WLB5	Clathrin heavy chain 2 OS=Arabidopsis thaliana OX=3702 GN=CHC2 PE=1 SV=1	193270	Carbamidomethylation; Oxidation (M); Acetylation (N-term)	99.2	302.46	12	10	8	8	10	10	5	9	7	8	9	11	17	3	27	18	20	26	24	13	25	22	21	29	38
97.155	260.64	413.88	365.66	419.46	132.79	543.81	632.49	584.34	487.21	601.56	A0A7G2DSK9	phosphoglucomutase (alpha-D-glucose-1 6-bisphosphate-dependent) OS=Arabidopsis thaliana OX=3702 GN=AT9943_LOCUS2029 PE=3 SV=1	156639	Oxidation (M)	99.2	288.66	12	8	7	9	8	8	6	10	11	12	11	9	15	5	23	23	21	24	22	15	28	29	22	24	31
2336.6	1200.2	2120.8	12434	5975.5	6359.3	2049.7	2129.5	6715.2	9987.4	10387	A0A654FLZ8	PAP_fibrillin domain-containing protein OS=Arabidopsis thaliana OX=3702 GN=AN1_LOCUS17319 PE=3 SV=1	34948		99.2	267.85	38	23	21	20	36	26	28	17	23	32	32	28	10	9	14	11	19	43	22	29	11	16	34	35	28
2336.6	1200.2	2120.8	12434	5975.5	6359.3	2049.7	2129.5	6715.2	9987.4	10387	O81439	Probable plastid-lipid-associated protein 1 chloroplastic OS=Arabidopsis thaliana OX=3702 GN=PAP1 PE=1 SV=1	34948		99.2	267.85	38	23	21	20	36	26	28	17	23	32	32	28	10	9	14	11	19	43	22	29	11	16	34	35	28
5818	2170.4	2653.3	6535.6	5095.7	6153.7	3364.1	7276.6	6788.6	7122.2	8467	Q0WVD8	ADP/ATP translocase OS=Arabidopsis thaliana OX=3702 GN=At3g08580 PE=2 SV=1	41476	Carbamidomethylation; Oxidation (M)	99.2	194.54	20	12	12	10	17	14	12	14	18	12	14	14	8	8	25	20	17	31	21	21	17	23	28	27	31
5818	2170.4	2653.3	6535.6	5095.7	6153.7	3364.1	7276.6	6788.6	7122.2	8467	P31167	ADP ATP carrier protein 1 mitochondrial OS=Arabidopsis thaliana OX=3702 GN=AAC1 PE=1 SV=2	41476	Carbamidomethylation; Oxidation (M)	99.2	194.54	20	12	12	10	17	14	12	14	18	12	14	14	8	8	25	20	17	31	21	21	17	23	28	27	31
5818	2170.4	2653.3	6535.6	5095.7	6153.7	3364.1	7276.6	6788.6	7122.2	8467	A0A384KYV2	ADP/ATP translocase OS=Arabidopsis thaliana OX=3702 GN=AXX17_At3g08150 PE=3 SV=1	41476	Carbamidomethylation; Oxidation (M)	99.2	194.54	20	12	12	10	17	14	12	14	18	12	14	14	8	8	25	20	17	31	21	21	17	23	28	27	31
1638.1	621.83	1288.2	782.11	1369.3	1096.2	1855.4	1499.3	1086.5	1705.7	1157	B9DHI9	AT1G09640 protein OS=Arabidopsis thaliana OX=3702 GN=At1g09640 PE=2 SV=1	46661	Carbamidomethylation; Oxidation (M); Acetylation (N-term)	99.2	288.74	28	25	23	23	23	25	15	21	28	25	25	26	12	6	24	20	25	20	20	17	25	31	22	23	34
1638.1	621.83	1288.2	782.11	1369.3	1096.2	1855.4	1499.3	1086.5	1705.7	1157	A0A384KT07	(thale cress) hypothetical protein OS=Arabidopsis thaliana OX=3702 GN=AXX17_At1g09580 PE=4 SV=1	46661	Carbamidomethylation; Oxidation (M); Acetylation (N-term)	99.2	288.74	28	25	23	23	23	25	15	21	28	25	25	26	12	6	24	20	25	20	20	17	25	31	22	23	34
1638.1	621.83	1288.2	782.11	1369.3	1096.2	1855.4	1499.3	1086.5	1705.7	1157	O04487	Probable elongation factor 1-gamma 1 OS=Arabidopsis thaliana OX=3702 GN=At1g09640 PE=1 SV=1	46661	Carbamidomethylation; Oxidation (M); Acetylation (N-term)	99.2	288.74	28	25	23	23	23	25	15	21	28	25	25	26	12	6	24	20	25	20	20	17	25	31	22	23	34
2291.5	703.76	1107.7	3181.2	1292.4	649.07	2938.8	2528.4	5603.2	2484.2	2438.3	A0A654FGI2	fructose-bisphosphatase OS=Arabidopsis thaliana OX=3702 GN=AN1_LOCUS15776 PE=3 SV=1	45162	Carbamidomethylation; Oxidation (M)	99.2	285.45	26	22	14	13	22	18	10	22	22	26	22	22	8	8	30	7	13	28	18	7	33	30	46	23	26
2291.5	703.76	1107.7	3181.2	1292.4	649.07	2938.8	2528.4	5603.2	2484.2	2438.3	P25851	Fructose-1 6-bisphosphatase 1 chloroplastic OS=Arabidopsis thaliana OX=3702 GN=CFBP1 PE=1 SV=2	45162	Carbamidomethylation; Oxidation (M)	99.2	285.45	26	22	14	13	22	18	10	22	22	26	22	22	8	8	30	7	13	28	18	7	33	30	46	23	26
2291.5	703.76	1107.7	3181.2	1292.4	649.07	2938.8	2528.4	5603.2	2484.2	2438.3	A0A178VEW8	fructose-bisphosphatase OS=Arabidopsis thaliana OX=3702 GN=AXX17_At3g48450 PE=3 SV=1	45164	Carbamidomethylation; Oxidation (M)	99.1	285.45	26	22	14	13	22	18	10	22	22	26	22	22	8	8	30	7	13	28	18	7	33	30	46	23	26
5250.4	4152.4	5136.5	4305.8	4268.3	2417.4	4999.1	5343.9	5998.7	4624.1	5383.9	A0A7G2EWR9	(thale cress) hypothetical protein OS=Arabidopsis thaliana OX=3702 GN=AT9943_LOCUS14513 PE=4 SV=1	111477		99.2	214.15	8	6	5	6	6	5	3	6	8	6	6	6	7	7	27	9	19	36	10	7	25	31	42	31	23
5250.4	4152.4	5136.5	4305.8	4268.3	2417.4	4999.1	5343.9	5998.7	4624.1	5383.9	A0A7G2EV69	(thale cress) hypothetical protein OS=Arabidopsis thaliana OX=3702 GN=AT9943_LOCUS14513 PE=4 SV=1	111679		99.2	214.15	8	6	5	6	6	5	3	6	8	6	6	6	7	7	27	9	19	36	10	7	25	31	42	31	23
5250.4	4152.4	5136.5	4305.8	4268.3	2417.4	4999.1	5343.9	5998.7	4624.1	5383.9	A0A1P8B8J7	Thylakoid rhodanese-like protein OS=Arabidopsis thaliana OX=3702 GN=TROL PE=1 SV=1	54469		99.2	214.15	15	12	9	12	12	9	7	12	15	12	12	12	7	7	27	9	19	36	10	7	25	31	42	31	23
5250.4	4152.4	5136.5	4305.8	4268.3	2417.4	4999.1	5343.9	5998.7	4624.1	5383.9	A0A178V0X3	TROL OS=Arabidopsis thaliana OX=3702 GN=AXX17_At4g01370 PE=4 SV=1	54481		99.2	214.15	15	12	9	12	12	9	7	12	15	12	12	12	7	7	27	9	19	36	10	7	25	31	42	31	23
5250.4	4152.4	5136.5	4305.8	4268.3	2417.4	4999.1	5343.9	5998.7	4624.1	5383.9	Q9M158	Rhodanese-like domain-containing protein 4 chloroplastic OS=Arabidopsis thaliana OX=3702 GN=STR4 PE=1 SV=2	49387		99.1	214.15	17	13	10	13	13	10	8	13	17	13	13	13	7	7	27	9	19	36	10	7	25	31	42	31	23
5250.4	4152.4	5136.5	4305.8	4268.3	2417.4	4999.1	5343.9	5998.7	4624.1	5383.9	A0A654FKW6	Rhodanese-like domain-containing protein 4 chloroplastic OS=Arabidopsis thaliana OX=3702 GN=AN1_LOCUS16887 PE=4 SV=1	47594		99.1	214.15	17	14	11	14	14	11	8	14	17	14	14	14	7	7	27	9	19	36	10	7	25	31	42	31	23
1234	958.44	1262	2257.7	1450.1	819.4	2217.6	1736.4	2555.8	1969.5	2076.1	A0A5S9XFR8	Dihydrolipoamide acetyltransferase component of pyruvate dehydrogenase complex OS=Arabidopsis thaliana OX=3702 GN=AT9943_LOCUS12055 PE=3 SV=1	50080	Carbamidomethylation; Oxidation (M)	99.2	312.19	34	18	16	14	23	19	16	31	20	25	28	29	11	9	19	25	18	23	22	20	23	30	31	23	26
1234	958.44	1262	2257.7	1450.1	819.4	2217.6	1736.4	2555.8	1969.5	2076.1	Q9SQI8	Dihydrolipoyllysine-residue acetyltransferase component 4 of pyruvate dehydrogenase complex chloroplastic OS=Arabidopsis thaliana OX=3702 GN=LTA2 PE=2 SV=1	50080	Carbamidomethylation; Oxidation (M)	99.2	312.19	34	18	16	14	23	19	16	31	20	25	28	29	11	9	19	25	18	23	22	20	23	30	31	23	26
1234	958.44	1262	2257.7	1450.1	819.4	2217.6	1736.4	2555.8	1969.5	2076.1	A0A178V5Z1	Dihydrolipoamide acetyltransferase component of pyruvate dehydrogenase complex OS=Arabidopsis thaliana OX=3702 GN=AXX17_At3g27940 PE=3 SV=1	50070	Carbamidomethylation; Oxidation (M)	99.2	312.19	34	18	16	14	23	19	16	31	20	25	28	29	11	9	19	25	18	23	22	20	23	30	31	23	26
643.63	564.14	578.54	447.38	469.78		615.67	163.33	546.41	1039.6	0	A0A654FB98	Clathrin heavy chain OS=Arabidopsis thaliana OX=3702 GN=AN1_LOCUS12433 PE=3 SV=1	193235	Carbamidomethylation; Oxidation (M); Acetylation (N-term)	99.2	309.06	13	10	8	7	10	9	5	9	9	9	10	10	19	5	26	18	19	25	24	13	26	25	24	26	33
643.63	564.14	578.54	447.38	469.78		615.67	163.33	546.41	1039.6	0	A0A178V904	Clathrin heavy chain OS=Arabidopsis thaliana OX=3702 GN=AXX17_At3g11020 PE=3 SV=1	193244	Carbamidomethylation; Oxidation (M); Acetylation (N-term)	99.2	309.06	13	10	8	7	10	9	5	9	9	9	10	10	19	5	26	18	19	25	24	13	26	25	24	26	33
643.63	564.14	578.54	447.38	469.78		615.67	163.33	546.41	1039.6	0	Q0WNJ6	Clathrin heavy chain 1 OS=Arabidopsis thaliana OX=3702 GN=CHC1 PE=1 SV=1	193244	Carbamidomethylation; Oxidation (M); Acetylation (N-term)	99.2	309.06	13	10	8	7	10	9	5	9	9	9	10	10	19	5	26	18	19	25	24	13	26	25	24	26	33
934.22	0	776.69	1029.5	738.17	743.43	1213.6	0	1117.3	1091.7	1251	A0A178USM6	40S ribosomal protein S6 OS=Arabidopsis thaliana OX=3702 GN=AXX17_At5g10020 PE=3 SV=1	28162	Carbamidomethylation; Oxidation (M)	99.1	231.68	33	32	32	32	33	32	26	32	32	33	32	33	8	2	22	22	25	23	17	19	31	18	30	23	28
934.22	0	776.69	1029.5	738.17	743.43	1213.6	0	1117.3	1091.7	1251	P51430	40S ribosomal protein S6-2 OS=Arabidopsis thaliana OX=3702 GN=RPS6B PE=1 SV=3	28162	Carbamidomethylation; Oxidation (M)	99.1	231.68	33	32	32	32	33	32	26	32	32	33	32	33	8	2	22	22	25	23	17	19	31	18	30	23	28
1238.5	800.59	727.12	1067.7	940.91	652.68	815.76	838.15	1068.5	1135.5	1438.4	P42645	14-3-3-like protein GF14 upsilon OS=Arabidopsis thaliana OX=3702 GN=GRF5 PE=1 SV=2	30182	Oxidation (M); Acetylation (N-term)	99.2	276.92	42	29	26	28	29	28	28	28	36	37	29	32	11	3	22	14	22	20	21	20	24	26	27	28	33
1238.5	800.59	727.12	1067.7	940.91	652.68	815.76	838.15	1068.5	1135.5	1438.4	A0A178UKR5	GRF5 OS=Arabidopsis thaliana OX=3702 GN=AXX17_At5g15620 PE=3 SV=1	30182	Oxidation (M); Acetylation (N-term)	99.2	276.92	42	29	26	28	29	28	28	28	36	37	29	32	11	3	22	14	22	20	21	20	24	26	27	28	33
1623.5	1662.2	1472.1	1629.6	1436	1221.8	1927.2	1282.1	1542.4	1618.5	1773.6	P51418	60S ribosomal protein L18a-2 OS=Arabidopsis thaliana OX=3702 GN=RPL18AB PE=1 SV=2	21307	Oxidation (M)	99.1	227.1	32	29	29	29	32	29	29	32	32	32	32	29	5	1	27	18	27	28	23	18	26	17	25	26	22
1623.5	1662.2	1472.1	1629.6	1436	1221.8	1927.2	1282.1	1542.4	1618.5	1773.6	A0A178VW11	60S ribosomal protein L18a OS=Arabidopsis thaliana OX=3702 GN=AXX17_At2g31020 PE=3 SV=1	21307	Oxidation (M)	99.1	227.1	32	29	29	29	32	29	29	32	32	32	32	29	5	1	27	18	27	28	23	18	26	17	25	26	22
1623.5	1662.2	1472.1	1629.6	1436	1221.8	1927.2	1282.1	1542.4	1618.5	1773.6	A0A1P8AY36	Ribosomal protein L18ae/LX family protein OS=Arabidopsis thaliana OX=3702 GN=At2g34480 PE=1 SV=1	25730	Oxidation (M)	99.1	227.1	26	24	24	24	26	24	24	26	26	26	26	24	5	1	27	18	27	28	23	18	26	17	25	26	22
6904.5	6091.5	5901.6	6540.5	5267.7	3795.7	7520.2	5740.1	7689.9	6804.9	8348	A0A178V3W4	50S ribosomal protein L5 chloroplastic OS=Arabidopsis thaliana OX=3702 GN=AXX17_At4g01660 PE=3 SV=1	28344	Carbamidomethylation; Oxidation (M)	99.2	270.27	45	37	37	29	38	29	21	37	44	42	37	38	12	12	22	22	25	24	21	20	22	26	29	23	23
6904.5	6091.5	5901.6	6540.5	5267.7	3795.7	7520.2	5740.1	7689.9	6804.9	8348	O04603	50S ribosomal protein L5 chloroplastic OS=Arabidopsis thaliana OX=3702 GN=RPL5 PE=2 SV=1	28344	Carbamidomethylation; Oxidation (M)	99.2	270.27	45	37	37	29	38	29	21	37	44	42	37	38	12	12	22	22	25	24	21	20	22	26	29	23	23
8497.7	11455	11031	10870	9702.4	7199.8	13886	10662	12790	11475	11778	A0A7G2EQQ3	Clustered mitochondria protein homolog OS=Arabidopsis thaliana OX=3702 GN=AT9943_LOCUS13402 PE=3 SV=1	178680	Oxidation (M)	99.2	257.49	6	5	5	5	5	5	5	5	5	5	5	5	12	12	20	26	23	27	29	15	22	22	21	24	26
736.83	346.7	392.67	700.57	429.95	281.77	496.47	563.62	818.5	722.08	715.7	A0A178UCA6	UTP--glucose-1-phosphate uridylyltransferase OS=Arabidopsis thaliana OX=3702 GN=AXX17_At5g16960 PE=3 SV=1	51920	Carbamidomethylation; Oxidation (M); Acetylation (N-term)	99.2	262.45	34	24	19	17	21	13	13	24	28	26	25	28	14	7	23	17	16	25	12	10	33	29	32	23	35
736.83	346.7	392.67	700.57	429.95	281.77	496.47	563.62	818.5	722.08	715.7	A0A5S9Y772	UTP--glucose-1-phosphate uridylyltransferase OS=Arabidopsis thaliana OX=3702 GN=AN1_LOCUS22509 PE=3 SV=1	51921	Carbamidomethylation; Oxidation (M); Acetylation (N-term)	99.2	262.45	34	24	19	17	21	13	13	24	28	26	25	28	14	7	23	17	16	25	12	10	33	29	32	23	35
736.83	346.7	392.67	700.57	429.95	281.77	496.47	563.62	818.5	722.08	715.7	P57751	UTP--glucose-1-phosphate uridylyltransferase 1 OS=Arabidopsis thaliana OX=3702 GN=UGP1 PE=2 SV=1	51920	Carbamidomethylation; Oxidation (M); Acetylation (N-term)	99.2	262.45	34	24	19	17	21	13	13	24	28	26	25	28	14	7	23	17	16	25	12	10	33	29	32	23	35
284.19	147.65	231.66	385.09	242.68		261.77	236.24	475.91	331.26	409	F4KGV2	G-box regulating factor 6 OS=Arabidopsis thaliana OX=3702 GN=GRF6 PE=1 SV=1	27718	Carbamidomethylation; Oxidation (M)	99.2	278.96	43	23	20	26	30	26	19	26	33	37	29	33	10	3	21	20	26	30	21	14	24	23	23	19	33
284.19	147.65	231.66	385.09	242.68		261.77	236.24	475.91	331.26	409	A0A178UDW2	GRF6 OS=Arabidopsis thaliana OX=3702 GN=AXX17_At5g10110 PE=3 SV=1	27976	Carbamidomethylation; Oxidation (M)	99.2	278.96	43	23	20	26	29	26	19	26	33	37	29	32	10	3	21	20	26	30	21	14	24	23	23	19	33
284.19	147.65	231.66	385.09	242.68		261.77	236.24	475.91	331.26	409	P48349	14-3-3-like protein GF14 lambda OS=Arabidopsis thaliana OX=3702 GN=GRF6 PE=1 SV=1	27976	Carbamidomethylation; Oxidation (M)	99.2	278.96	43	23	20	26	29	26	19	26	33	37	29	32	10	3	21	20	26	30	21	14	24	23	23	19	33
284.19	147.65	231.66	385.09	242.68		261.77	236.24	475.91	331.26	409	F4KGV5	G-box regulating factor 6 OS=Arabidopsis thaliana OX=3702 GN=GRF6 PE=1 SV=1	29131	Carbamidomethylation; Oxidation (M)	99.2	278.96	41	22	19	25	28	25	18	25	32	35	28	31	10	3	21	20	26	30	21	14	24	23	23	19	33
15551	12870	13965	18394	14262	11316	13510	15200	16867	16797	19495	Q9S7N7	Photosystem I reaction center subunit V chloroplastic OS=Arabidopsis thaliana OX=3702 GN=PSAG PE=1 SV=1	17085		98.4	165.94	17	17	11	11	17	11	11	17	11	17	11	17	5	5	24	20	24	24	21	17	21	27	28	19	28
15551	12870	13965	18394	14262	11316	13510	15200	16867	16797	19495	A0A178W7I8	Photosystem I reaction center subunit V chloroplastic OS=Arabidopsis thaliana OX=3702 GN=AXX17_At1g50290 PE=3 SV=1	17115		98.4	165.94	17	17	11	11	17	11	11	17	11	17	11	17	5	5	24	20	24	24	21	17	21	27	28	19	28
15551	12870	13965	18394	14262	11316	13510	15200	16867	16797	19495	A0A5S9WMM5	Photosystem I reaction center subunit V chloroplastic OS=Arabidopsis thaliana OX=3702 GN=C24_LOCUS4583 PE=3 SV=1	17085		98.4	165.94	17	17	11	11	17	11	11	17	11	17	11	17	5	5	24	20	24	24	21	17	21	27	28	19	28
15551	12870	13965	18394	14262	11316	13510	15200	16867	16797	19495	A0A654EK87	Photosystem I reaction center subunit V chloroplastic OS=Arabidopsis thaliana OX=3702 GN=AN1_LOCUS4697 PE=3 SV=1	17055		98.4	165.94	17	17	11	11	17	11	11	17	11	17	11	17	5	5	24	20	24	24	21	17	21	27	28	19	28
20863	19375	18460	20840	19435	13452	24915	16999	20509	20168	25513	Q42589	Non-specific lipid-transfer protein 1 OS=Arabidopsis thaliana OX=3702 GN=LTP1 PE=2 SV=1	11755	Carbamidomethylation	99	203.54	37	37	37	37	37	37	33	37	37	37	37	37	5	5	25	25	22	27	24	17	25	21	19	25	23
20863	19375	18460	20840	19435	13452	24915	16999	20509	20168	25513	A0A5S9X554	Non-specific lipid-transfer protein OS=Arabidopsis thaliana OX=3702 GN=AT9943_LOCUS8859 PE=3 SV=1	11759	Carbamidomethylation	99	203.54	37	37	37	37	37	37	33	37	37	37	37	37	5	5	25	25	22	27	24	17	25	21	19	25	23
20863	19375	18460	20840	19435	13452	24915	16999	20509	20168	25513	A0A178VZQ3	Non-specific lipid-transfer protein OS=Arabidopsis thaliana OX=3702 GN=AXX17_At2g35400 PE=3 SV=1	11755	Carbamidomethylation	99	203.54	37	37	37	37	37	37	33	37	37	37	37	37	5	5	25	25	22	27	24	17	25	21	19	25	23
2560.1	2482.1	2427.5	2376.4	2319.5	1816.7	2865.7	1847.6	2311.4	2610.6	3062.5	Q9CAX6	40S ribosomal protein S14-2 OS=Arabidopsis thaliana OX=3702 GN=RPS14B PE=1 SV=1	16273	Oxidation (M)	99	238.42	40	26	24	26	40	26	24	26	40	40	26	26	6	1	23	20	20	27	21	25	21	18	30	25	22
2560.1	2482.1	2427.5	2376.4	2319.5	1816.7	2865.7	1847.6	2311.4	2610.6	3062.5	Q1H555	At3g11510 OS=Arabidopsis thaliana OX=3702 PE=2 SV=1	16273	Oxidation (M)	99	238.42	40	26	24	26	40	26	24	26	40	40	26	26	6	1	23	20	20	27	21	25	21	18	30	25	22
2560.1	2482.1	2427.5	2376.4	2319.5	1816.7	2865.7	1847.6	2311.4	2610.6	3062.5	A0A384KVT5	(thale cress) hypothetical protein OS=Arabidopsis thaliana OX=3702 GN=AXX17_At3g11430 PE=3 SV=1	16273	Oxidation (M)	99	238.42	40	26	24	26	40	26	24	26	40	40	26	26	6	1	23	20	20	27	21	25	21	18	30	25	22
4125.4	2718.2	3387.8	2368	3482.3	2834	4322.6	3624.6	3520.6	4342.8	4638.6	A0A178UG39	Thylakoid lumenal 17.4 kDa protein chloroplastic OS=Arabidopsis thaliana OX=3702 GN=At5g53490 PE=4 SV=1	25573	Carbamidomethylation; Oxidation (M)	99.1	247.05	34	33	33	29	25	29	29	29	29	33	33	34	9	9	22	22	17	21	22	24	23	20	27	28	25
4125.4	2718.2	3387.8	2368	3482.3	2834	4322.6	3624.6	3520.6	4342.8	4638.6	P81760	Thylakoid lumenal 17.4 kDa protein chloroplastic OS=Arabidopsis thaliana OX=3702 GN=TL17 PE=1 SV=2	25644	Carbamidomethylation; Oxidation (M)	99.1	247.05	34	33	33	29	25	29	28	29	28	33	33	34	9	9	22	22	17	21	22	24	23	20	27	28	25
4125.4	2718.2	3387.8	2368	3482.3	2834	4322.6	3624.6	3520.6	4342.8	4638.6	A0A178UI74	Thylakoid lumenal 17.4 kDa protein chloroplastic OS=Arabidopsis thaliana OX=3702 GN=AXX17_At5g52450 PE=4 SV=1	25644	Carbamidomethylation; Oxidation (M)	99.1	247.05	34	33	33	29	25	29	28	29	28	33	33	34	9	9	22	22	17	21	22	24	23	20	27	28	25
4125.4	2718.2	3387.8	2368	3482.3	2834	4322.6	3624.6	3520.6	4342.8	4638.6	F4JX83	Tetratricopeptide repeat (TPR)-like superfamily protein OS=Arabidopsis thaliana OX=3702 GN=MNC6.3 PE=1 SV=1	27225	Carbamidomethylation; Oxidation (M)	99.1	247.05	32	31	31	28	23	28	27	28	27	31	31	32	9	9	22	22	17	21	22	24	23	20	27	28	25
4125.4	2718.2	3387.8	2368	3482.3	2834	4322.6	3624.6	3520.6	4342.8	4638.6	A0A1P8BAQ0	Tetratricopeptide repeat (TPR)-like superfamily protein OS=Arabidopsis thaliana OX=3702 GN=MNC6.3 PE=1 SV=1	28254	Carbamidomethylation; Oxidation (M)	99.1	247.05	31	30	30	27	22	27	26	27	26	30	30	31	9	9	22	22	17	21	22	24	23	20	27	28	25
4125.4	2718.2	3387.8	2368	3482.3	2834	4322.6	3624.6	3520.6	4342.8	4638.6	A0A7G2FMA9	(thale cress) hypothetical protein OS=Arabidopsis thaliana OX=3702 GN=AT9943_LOCUS22072 PE=4 SV=1	25587	Carbamidomethylation; Oxidation (M)	99.1	247.05	34	33	33	29	25	29	29	29	29	33	33	34	9	9	22	22	17	21	22	24	23	20	27	28	25
4125.4	2718.2	3387.8	2368	3482.3	2834	4322.6	3624.6	3520.6	4342.8	4638.6	A0A654GAL4	(thale cress) hypothetical protein OS=Arabidopsis thaliana OX=3702 GN=AN1_LOCUS25610 PE=4 SV=1	25658	Carbamidomethylation; Oxidation (M)	99.1	247.05	34	33	33	29	25	29	28	29	28	33	33	34	9	9	22	22	17	21	22	24	23	20	27	28	25
1742.3	848.84	1459.6	3178.2	1592.5	790.91	1638.8	1684	3288.3	2600.5	3560.7	A0A1P8B564	Catalase OS=Arabidopsis thaliana OX=3702 GN=CAT2 PE=1 SV=1	56950	Carbamidomethylation; Oxidation (M)	99.2	278.5	28	11	14	13	24	20	9	11	17	22	17	20	13	7	15	14	15	37	22	11	15	30	32	28	31
1742.3	848.84	1459.6	3178.2	1592.5	790.91	1638.8	1684	3288.3	2600.5	3560.7	A0A5S9XYQ5	Catalase OS=Arabidopsis thaliana OX=3702 GN=AN1_LOCUS20349 PE=3 SV=1	56931	Carbamidomethylation; Oxidation (M)	99.2	278.5	28	11	14	13	24	20	9	11	17	22	17	20	13	7	15	14	15	37	22	11	15	30	32	28	31
1742.3	848.84	1459.6	3178.2	1592.5	790.91	1638.8	1684	3288.3	2600.5	3560.7	P25819	Catalase-2 OS=Arabidopsis thaliana OX=3702 GN=CAT2 PE=1 SV=3	56931	Carbamidomethylation; Oxidation (M)	99.2	278.5	28	11	14	13	24	20	9	11	17	22	17	20	13	7	15	14	15	37	22	11	15	30	32	28	31
1742.3	848.84	1459.6	3178.2	1592.5	790.91	1638.8	1684	3288.3	2600.5	3560.7	A0A178UUD0	Catalase OS=Arabidopsis thaliana OX=3702 GN=AXX17_At4g40070 PE=3 SV=1	56917	Carbamidomethylation; Oxidation (M)	99.2	278.5	28	11	14	13	24	20	9	11	17	22	17	20	13	7	15	14	15	37	22	11	15	30	32	28	31
6346.8	4208.1	5270.7	4853.6	4441.5	3144.7	5545.2	4965.8	6544.6	6768.2	7352.8	Q39258	V-type proton ATPase subunit E1 OS=Arabidopsis thaliana OX=3702 GN=VHA-E1 PE=1 SV=2	26060	Carbamidomethylation; Oxidation (M)	99.2	272.05	37	30	29	29	33	29	29	30	30	33	29	33	11	11	27	15	17	25	27	14	21	28	25	26	25
6346.8	4208.1	5270.7	4853.6	4441.5	3144.7	5545.2	4965.8	6544.6	6768.2	7352.8	A0A5S9XRW2	V-type proton ATPase subunit E OS=Arabidopsis thaliana OX=3702 GN=AN1_LOCUS17705 PE=3 SV=1	26060	Carbamidomethylation; Oxidation (M)	99.2	272.05	37	30	29	29	33	29	29	30	30	33	29	33	11	11	27	15	17	25	27	14	21	28	25	26	25
1406.4	1473.9	1212.5	1942.9	1754.6	1399.8	1790.4	1262.4	1608.3	1460	1918.3	A0A654FUP3	40S ribosomal protein S6 OS=Arabidopsis thaliana OX=3702 GN=AN1_LOCUS19978 PE=3 SV=1	28367	Carbamidomethylation; Oxidation (M)	99.2	238.6	36	36	26	29	36	36	29	33	36	34	33	36	9	3	21	17	18	23	18	21	30	21	30	22	29
1406.4	1473.9	1212.5	1942.9	1754.6	1399.8	1790.4	1262.4	1608.3	1460	1918.3	O48549	40S ribosomal protein S6-1 OS=Arabidopsis thaliana OX=3702 GN=RPS6A PE=1 SV=2	28367	Carbamidomethylation; Oxidation (M)	99.2	238.6	36	36	26	29	36	36	29	33	36	34	33	36	9	3	21	17	18	23	18	21	30	21	30	22	29
2042.7	1956.6	1686.8	2436	2052.9	1286.4	3201.5	1642.1	2799.6	1914.5	2519.6	A0A7G2E4M5	Delta-aminolevulinic acid dehydratase OS=Arabidopsis thaliana OX=3702 GN=AT9943_LOCUS5078 PE=3 SV=1	61156	Oxidation (M)	99.2	296.11	20	13	13	13	13	16	13	18	18	18	16	18	9	9	19	21	16	19	20	12	31	26	39	23	22
2042.7	1956.6	1686.8	2436	2052.9	1286.4	3201.5	1642.1	2799.6	1914.5	2519.6	A0A178WCT0	Delta-aminolevulinic acid dehydratase OS=Arabidopsis thaliana OX=3702 GN=AXX17_At1g63860 PE=3 SV=1	46690	Oxidation (M)	99.2	296.11	25	17	17	17	17	21	17	23	23	23	21	23	9	9	19	21	16	19	20	12	31	26	39	23	22
2042.7	1956.6	1686.8	2436	2052.9	1286.4	3201.5	1642.1	2799.6	1914.5	2519.6	Q9SFH9	Delta-aminolevulinic acid dehydratase 1 chloroplastic OS=Arabidopsis thaliana OX=3702 GN=HEMB1 PE=2 SV=1	46690	Oxidation (M)	99.2	296.11	25	17	17	17	17	21	17	23	23	23	21	23	9	9	19	21	16	19	20	12	31	26	39	23	22
9880.5	7067.2	8256.9	9922.7	7406.9	5751.8	9334.9	8924.8	10744	8810.6	10622	P0DKC3	Phosphoglycolate phosphatase 1A chloroplastic OS=Arabidopsis thaliana OX=3702 GN=PGLP1A PE=1 SV=1	39762	Carbamidomethylation; Oxidation (M)	99.1	191.25	17	17	14	17	17	17	14	17	17	17	17	17	6	6	21	20	23	25	21	28	20	21	25	22	21
9880.5	7067.2	8256.9	9922.7	7406.9	5751.8	9334.9	8924.8	10744	8810.6	10622	P0DKC4	Phosphoglycolate phosphatase 1B chloroplastic OS=Arabidopsis thaliana OX=3702 GN=PGLP1B PE=1 SV=1	39762	Carbamidomethylation; Oxidation (M)	99.1	191.25	17	17	14	17	17	17	14	17	17	17	17	17	6	6	21	20	23	25	21	28	20	21	25	22	21
9880.5	7067.2	8256.9	9922.7	7406.9	5751.8	9334.9	8924.8	10744	8810.6	10622	A0A654G5Q1	Phosphoglycolate phosphatase OS=Arabidopsis thaliana OX=3702 GN=AN1_LOCUS23819 PE=4 SV=1	39804	Carbamidomethylation; Oxidation (M)	99.1	191.25	17	17	14	17	17	17	14	17	17	17	17	17	6	6	21	20	23	25	21	28	20	21	25	22	21
9880.5	7067.2	8256.9	9922.7	7406.9	5751.8	9334.9	8924.8	10744	8810.6	10622	A0A178UPN0	(thale cress) hypothetical protein OS=Arabidopsis thaliana OX=3702 GN=AXX17_At5g33710 PE=4 SV=1	39762	Carbamidomethylation; Oxidation (M)	99.1	191.25	17	17	14	17	17	17	14	17	17	17	17	17	6	6	21	20	23	25	21	28	20	21	25	22	21
5779.6	4693.1	5681.9	6596.7	5173.8	3348.3	7534	5399.8	7147.4	6719.3	6065.5	P50883	60S ribosomal protein L12-1 OS=Arabidopsis thaliana OX=3702 GN=RPL12A PE=2 SV=2	17942		99	169.29	22	22	22	22	22	22	22	22	22	22	22	22	3	3	23	22	20	19	22	16	27	21	22	27	27
5779.6	4693.1	5681.9	6596.7	5173.8	3348.3	7534	5399.8	7147.4	6719.3	6065.5	A0A384LHB1	(thale cress) hypothetical protein OS=Arabidopsis thaliana OX=3702 GN=AXX17_At3g47820 PE=3 SV=1	17970		99	169.29	22	22	22	22	22	22	22	22	22	22	22	22	3	3	23	22	20	19	22	16	27	21	22	27	27
5779.6	4693.1	5681.9	6596.7	5173.8	3348.3	7534	5399.8	7147.4	6719.3	6065.5	A0A178VR43	(thale cress) hypothetical protein OS=Arabidopsis thaliana OX=3702 GN=AXX17_At2g33980 PE=3 SV=1	17942		99	169.29	22	22	22	22	22	22	22	22	22	22	22	22	3	3	23	22	20	19	22	16	27	21	22	27	27
5779.6	4693.1	5681.9	6596.7	5173.8	3348.3	7534	5399.8	7147.4	6719.3	6065.5	Q9LFH5	60S ribosomal protein L12-2 OS=Arabidopsis thaliana OX=3702 GN=RPL12B PE=1 SV=1	17970		99	169.29	22	22	22	22	22	22	22	22	22	22	22	22	3	3	23	22	20	19	22	16	27	21	22	27	27
5779.6	4693.1	5681.9	6596.7	5173.8	3348.3	7534	5399.8	7147.4	6719.3	6065.5	Q0WW72	60S ribosomal Protein L12-like OS=Arabidopsis thaliana OX=3702 GN=At3g53430 PE=2 SV=1	17970		99	169.29	22	22	22	22	22	22	22	22	22	22	22	22	3	3	23	22	20	19	22	16	27	21	22	27	27
5779.6	4693.1	5681.9	6596.7	5173.8	3348.3	7534	5399.8	7147.4	6719.3	6065.5	Q9FF52	60S ribosomal protein L12-3 OS=Arabidopsis thaliana OX=3702 GN=RPL12C PE=2 SV=1	17843		98.9	169.29	22	22	22	22	22	22	22	22	22	22	22	22	3	3	23	22	20	19	22	16	27	21	22	27	27
5779.6	4693.1	5681.9	6596.7	5173.8	3348.3	7534	5399.8	7147.4	6719.3	6065.5	A0A178UAV0	(thale cress) hypothetical protein OS=Arabidopsis thaliana OX=3702 GN=AXX17_At5g60130 PE=3 SV=1	17843		98.9	169.29	22	22	22	22	22	22	22	22	22	22	22	22	3	3	23	22	20	19	22	16	27	21	22	27	27
4244	2477	3213.9	1878.6	2039.5	1100.8	4229.1	3609.4	3287.8	3005.4	2151.5	A0A654F8L9	M16C_associated domain-containing protein OS=Arabidopsis thaliana OX=3702 GN=AN1_LOCUS13331 PE=4 SV=1	120800	Carbamidomethylation; Oxidation (M)	99.2	318.78	21	19	10	11	9	8	6	19	15	18	9	12	18	18	35	16	22	14	14	13	29	33	28	23	18
4244	2477	3213.9	1878.6	2039.5	1100.8	4229.1	3609.4	3287.8	3005.4	2151.5	Q9LJL3	Presequence protease 1 chloroplastic/mitochondrial OS=Arabidopsis thaliana OX=3702 GN=PREP1 PE=1 SV=2	121015	Carbamidomethylation; Oxidation (M)	99.2	318.78	21	19	10	11	9	8	6	19	15	18	9	12	18	18	35	16	22	14	14	13	29	33	28	23	18
4244	2477	3213.9	1878.6	2039.5	1100.8	4229.1	3609.4	3287.8	3005.4	2151.5	A0A178VHU1	PREP1 OS=Arabidopsis thaliana OX=3702 GN=AXX17_At3g20360 PE=4 SV=1	121015	Carbamidomethylation; Oxidation (M)	99.2	318.78	21	19	10	11	9	8	6	19	15	18	9	12	18	18	35	16	22	14	14	13	29	33	28	23	18
1243.3	1250	1110	1005.4	982.54	1030	1208.8	961.04	1180.3	1055.6	1216.6	F4JEL5	Eukaryotic translation initiation factor 4A1 OS=Arabidopsis thaliana OX=3702 GN=EIF4A1 PE=1 SV=1	46137	Carbamidomethylation; Oxidation (M); Acetylation (N-term)	99.2	228.33	20	18	15	16	18	18	11	18	14	14	18	18	8	1	27	18	25	28	20	12	29	19	25	19	23
1243.3	1250	1110	1005.4	982.54	1030	1208.8	961.04	1180.3	1055.6	1216.6	P41376	Eukaryotic initiation factor 4A-1 OS=Arabidopsis thaliana OX=3702 GN=EIF4A1 PE=1 SV=1	46705	Carbamidomethylation; Oxidation (M); Acetylation (N-term)	99.2	228.33	20	17	15	16	17	17	11	18	14	13	17	17	8	1	27	18	25	28	20	12	29	19	25	19	23
1243.3	1250	1110	1005.4	982.54	1030	1208.8	961.04	1180.3	1055.6	1216.6	A0A178V707	(thale cress) hypothetical protein OS=Arabidopsis thaliana OX=3702 GN=AXX17_At3g14410 PE=3 SV=1	46705	Carbamidomethylation; Oxidation (M); Acetylation (N-term)	99.2	228.33	20	17	15	16	17	17	11	18	14	13	17	17	8	1	27	18	25	28	20	12	29	19	25	19	23
2010.1	1478.8	1539.1	1966.1	1131.7	937.98	2480.7	2076.3	1922.3	1175.5	2205.6	A0A7G2DRX4	Pyruvate dehydrogenase E1 component subunit alpha OS=Arabidopsis thaliana OX=3702 GN=AT9943_LOCUS7 PE=3 SV=1	91330	Oxidation (M)	99.2	255.6	14	12	10	12	10	12	9	14	10	12	11	11	11	11	26	17	24	22	21	14	28	21	26	20	24
10570	4586.8	4329.6	4733	8082.3	4371.8	5712.8	5105.3	7120.5	4306.6	8572.7	A0A7G2E075	(thale cress) hypothetical protein OS=Arabidopsis thaliana OX=3702 GN=AT9943_LOCUS3690 PE=3 SV=1	13859		98.7	191.27	18	18	18	18	18	18	18	18	18	18	18	18	4	4	26	17	23	23	24	14	23	23	29	20	21
10570	4586.8	4329.6	4733	8082.3	4371.8	5712.8	5105.3	7120.5	4306.6	8572.7	Q9SUI7	Photosystem I reaction center subunit VI-1 chloroplastic OS=Arabidopsis thaliana OX=3702 GN=PSAH1 PE=2 SV=1	15217		98.6	191.27	16	16	16	16	16	16	16	16	16	16	16	16	4	4	26	17	23	23	24	14	23	23	29	20	21
10570	4586.8	4329.6	4733	8082.3	4371.8	5712.8	5105.3	7120.5	4306.6	8572.7	A0A384L3S5	(thale cress) hypothetical protein OS=Arabidopsis thaliana OX=3702 GN=AXX17_At3g16940 PE=3 SV=1	15217		98.6	191.27	16	16	16	16	16	16	16	16	16	16	16	16	4	4	26	17	23	23	24	14	23	23	29	20	21
10570	4586.8	4329.6	4733	8082.3	4371.8	5712.8	5105.3	7120.5	4306.6	8572.7	A0A178WML3	PSI-H OS=Arabidopsis thaliana OX=3702 GN=AXX17_At1g46490 PE=3 SV=1	15274		98.6	191.27	16	16	16	16	16	16	16	16	16	16	16	16	4	4	26	17	23	23	24	14	23	23	29	20	21
10570	4586.8	4329.6	4733	8082.3	4371.8	5712.8	5105.3	7120.5	4306.6	8572.7	Q9SUI6	Photosystem I reaction center subunit VI-2 chloroplastic OS=Arabidopsis thaliana OX=3702 GN=PSAH2 PE=1 SV=1	15274		98.6	191.27	16	16	16	16	16	16	16	16	16	16	16	16	4	4	26	17	23	23	24	14	23	23	29	20	21
10570	4586.8	4329.6	4733	8082.3	4371.8	5712.8	5105.3	7120.5	4306.6	8572.7	Q0WWU6	At3g16140 OS=Arabidopsis thaliana OX=3702 GN=At3g16140 PE=2 SV=1	15217		98.6	191.27	16	16	16	16	16	16	16	16	16	16	16	16	4	4	26	17	23	23	24	14	23	23	29	20	21
2897.6	1787.5	2512.8	3242.8	2119.7	1423	3375.1	2183.8	3285.5	2749.6	3088.6	A0A654EL34	Nuclear protein OS=Arabidopsis thaliana OX=3702 GN=AN1_LOCUS1742 PE=4 SV=1	33729	Oxidation (M)	99.2	243.85	37	23	20	30	31	23	16	29	25	31	28	23	11	11	22	18	20	26	23	13	27	19	26	23	25
2897.6	1787.5	2512.8	3242.8	2119.7	1423	3375.1	2183.8	3285.5	2749.6	3088.6	C0Z2K9	AT1G16080 protein OS=Arabidopsis thaliana OX=3702 GN=At1g16080 PE=2 SV=1	33351	Oxidation (M)	99.2	243.85	37	23	20	29	31	23	16	29	25	31	28	23	11	11	22	18	20	26	23	13	27	19	26	23	25
2897.6	1787.5	2512.8	3242.8	2119.7	1423	3375.1	2183.8	3285.5	2749.6	3088.6	Q9S9M7	Nuclear protein OS=Arabidopsis thaliana OX=3702 GN=AT1G16080 PE=1 SV=1	34130	Oxidation (M)	99.2	243.85	37	23	19	29	30	23	15	28	24	31	28	23	11	11	22	18	20	26	23	13	27	19	26	23	25
2897.6	1787.5	2512.8	3242.8	2119.7	1423	3375.1	2183.8	3285.5	2749.6	3088.6	A0A178WL48	Nuclear protein OS=Arabidopsis thaliana OX=3702 GN=At1g16080 PE=1 SV=1	34130	Oxidation (M)	99.2	243.85	37	23	19	29	30	23	15	28	24	31	28	23	11	11	22	18	20	26	23	13	27	19	26	23	25
2897.6	1787.5	2512.8	3242.8	2119.7	1423	3375.1	2183.8	3285.5	2749.6	3088.6	A0A7G2DTK3	(thale cress) hypothetical protein OS=Arabidopsis thaliana OX=3702 GN=AT9943_LOCUS1391 PE=4 SV=1	43844	Oxidation (M)	99.2	243.85	28	18	15	23	24	18	12	22	19	24	22	18	11	11	22	18	20	26	23	13	27	19	26	23	25
3901.8	3927.3	4370.3	4477.8	3985.9	2443.5	2631	4783.1	5669.5	6032.4	4232.4	Q94JQ4	Reactive Intermediate Deaminase A chloroplastic OS=Arabidopsis thaliana OX=3702 GN=RIDA PE=1 SV=1	19816	Oxidation (M)	99.1	300.46	51	47	33	36	43	36	33	42	43	43	51	47	9	9	20	21	20	22	25	13	24	22	25	27	22
3901.8	3927.3	4370.3	4477.8	3985.9	2443.5	2631	4783.1	5669.5	6032.4	4232.4	A0A5S9XE57	Reactive Intermediate Deaminase A chloroplastic OS=Arabidopsis thaliana OX=3702 GN=AN1_LOCUS13464 PE=3 SV=1	19816	Oxidation (M)	99.1	300.46	51	47	33	36	43	36	33	42	43	43	51	47	9	9	20	21	20	22	25	13	24	22	25	27	22
3901.8	3927.3	4370.3	4477.8	3985.9	2443.5	2631	4783.1	5669.5	6032.4	4232.4	A0A1I9LS34	Endoribonuclease L-PSP family protein OS=Arabidopsis thaliana OX=3702 GN=RidA PE=1 SV=1	27800	Oxidation (M)	99.1	300.46	37	35	24	27	31	27	24	31	31	31	37	35	9	9	20	21	20	22	25	13	24	22	25	27	22
0			0			0	66.809	0	0	0	A0A178UEJ8	(thale cress) hypothetical protein OS=Arabidopsis thaliana OX=3702 GN=AXX17_At5g65250 PE=3 SV=1	28029	Oxidation (M)	99.1	263.83	36	23	13	19	29	19	19	26	27	30	23	32	9	2	20	19	25	27	19	14	23	21	22	17	33
0			0			0	66.809	0	0	0	P48348	14-3-3-like protein GF14 kappa OS=Arabidopsis thaliana OX=3702 GN=GRF8 PE=1 SV=2	28029	Oxidation (M)	99.1	263.83	36	23	13	19	29	19	19	26	27	30	23	32	9	2	20	19	25	27	19	14	23	21	22	17	33
0			0			0	66.809	0	0	0	F4KHY7	General regulatory factor 8 OS=Arabidopsis thaliana OX=3702 GN=GRF8 PE=1 SV=1	29531	Oxidation (M)	99.1	263.83	35	22	12	18	28	18	18	25	25	29	22	31	9	2	20	19	25	27	19	14	23	21	22	17	33
312.31	0	232.16	289.21	266.25	141.22	309.68	224.07	304.6	260.81	365.53	Q96300	14-3-3-like protein GF14 nu OS=Arabidopsis thaliana OX=3702 GN=GRF7 PE=1 SV=1	29824	Oxidation (M); Acetylation (N-term)	99.2	264.92	38	20	17	23	20	19	19	28	27	32	20	28	11	2	17	12	24	17	19	16	26	22	29	24	33
312.31	0	232.16	289.21	266.25	141.22	309.68	224.07	304.6	260.81	365.53	A0A178VJ06	(thale cress) hypothetical protein OS=Arabidopsis thaliana OX=3702 GN=AXX17_At3g01750 PE=3 SV=1	29824	Oxidation (M); Acetylation (N-term)	99.2	264.92	38	20	17	23	20	19	19	28	27	32	20	28	11	2	17	12	24	17	19	16	26	22	29	24	33
3795	2002.8	7985.9	9552.8	2251.1	1395.6	3457.2	3059.5	4333.8	3272.9	4516.3	A0A654FXJ4	Chaperone protein DnaJ OS=Arabidopsis thaliana OX=3702 GN=AN1_LOCUS21006 PE=4 SV=1	13382	Carbamidomethylation	99	250.19	34	24	22	29	34	23	22	23	24	24	23	24	7	7	21	14	18	32	17	11	19	23	30	23	31
3795	2002.8	7985.9	9552.8	2251.1	1395.6	3457.2	3059.5	4333.8	3272.9	4516.3	Q9FPH2	AT5g02160 OS=Arabidopsis thaliana OX=3702 GN=At5g02160 PE=1 SV=1	13378	Carbamidomethylation	99	250.19	34	24	22	29	34	23	22	23	24	24	23	24	7	7	21	14	18	32	17	11	19	23	30	23	31
3795	2002.8	7985.9	9552.8	2251.1	1395.6	3457.2	3059.5	4333.8	3272.9	4516.3	A0A178UB22	(thale cress) hypothetical protein OS=Arabidopsis thaliana OX=3702 GN=AXX17_At5g01270 PE=4 SV=1	13378	Carbamidomethylation	99	250.19	34	24	22	29	34	23	22	23	24	24	23	24	7	7	21	14	18	32	17	11	19	23	30	23	31
282.76	118.22	0	191.73	101.07		326.61	339.06	341.05	211.94	445.69	A0A178VYU7	(thale cress) hypothetical protein OS=Arabidopsis thaliana OX=3702 GN=AXX17_At2g19830 PE=3 SV=1	54509	Carbamidomethylation; Oxidation (M); Acetylation (N-term)	99.2	291.25	33	22	17	19	20	18	8	17	27	27	19	28	13	7	25	10	19	23	24	14	20	29	27	16	32
282.76	118.22	0	191.73	101.07		326.61	339.06	341.05	211.94	445.69	P30184	Leucine aminopeptidase 1 OS=Arabidopsis thaliana OX=3702 GN=LAP1 PE=1 SV=1	54509	Carbamidomethylation; Oxidation (M); Acetylation (N-term)	99.2	291.25	33	22	17	19	20	18	8	17	27	27	19	28	13	7	25	10	19	23	24	14	20	29	27	16	32
6201.4	7283.5	4879	4817.3	4255.5	6384	5366.8	5192	13727	5539.5	5371.7	A0A654FG96	HMA domain-containing protein OS=Arabidopsis thaliana OX=3702 GN=At3g56240 PE=4 SV=1	12900	Carbamidomethylation; Oxidation (M)	99.1	265.85	63	63	49	63	63	63	60	63	63	63	63	63	8	8	23	16	22	21	27	17	27	20	17	28	19
6201.4	7283.5	4879	4817.3	4255.5	6384	5366.8	5192	13727	5539.5	5371.7	A0A178V898	(thale cress) hypothetical protein OS=Arabidopsis thaliana OX=3702 GN=AXX17_At3g50880 PE=1 SV=1	12971	Carbamidomethylation; Oxidation (M)	99.1	265.85	63	63	49	63	63	63	60	63	63	63	63	63	8	8	23	16	22	21	27	17	27	20	17	28	19
6201.4	7283.5	4879	4817.3	4255.5	6384	5366.8	5192	13727	5539.5	5371.7	O82089	Copper transport protein CCH OS=Arabidopsis thaliana OX=3702 GN=CCH PE=1 SV=1	12971	Carbamidomethylation; Oxidation (M)	99.1	265.85	63	63	49	63	63	63	60	63	63	63	63	63	8	8	23	16	22	21	27	17	27	20	17	28	19
2626.7	1430.4	2571	2404.5	1704.9	378.46	1562.7	1987.2	1737.1	1650.8	2389.1	Q8VZ10	Protein SUPPRESSOR OF QUENCHING 1 chloroplastic OS=Arabidopsis thaliana OX=3702 GN=SOQ1 PE=1 SV=1	114402	Oxidation (M)	99.2	289.68	18	16	13	10	15	8	7	12	14	13	14	13	17	17	27	27	21	26	13	11	23	21	19	24	22
			6904.6	3468	3784.5			2921.6	5006.5	5534.3	A0A654FD94	SHSP domain-containing protein OS=Arabidopsis thaliana OX=3702 GN=AN1_LOCUS14952 PE=3 SV=1	17440	Oxidation (M)	99.1	252.82	40	0	0	0	39	35	39	0	0	40	40	40	9	5	0	0	0	51	36	31	0	0	32	41	43
			6904.6	3468	3784.5			2921.6	5006.5	5534.3	P19036	17.4 kDa class I heat shock protein OS=Arabidopsis thaliana OX=3702 GN=HSP17.4A PE=1 SV=2	17440	Oxidation (M)	99.1	252.82	40	0	0	0	39	35	39	0	0	40	40	40	9	5	0	0	0	51	36	31	0	0	32	41	43
4031.7	3757.4	4274.3	5135	3905.3	2942.9	4813.1	4182.4	4639.9	4289.7	5021.1	Q9ZVA4	EP1-like glycoprotein 3 OS=Arabidopsis thaliana OX=3702 GN=At1g78850 PE=1 SV=1	49051	Carbamidomethylation; Oxidation (M)	99.2	272.71	22	17	10	18	20	19	10	17	18	15	17	22	8	7	22	15	23	34	19	12	23	23	21	17	24
4031.7	3757.4	4274.3	5135	3905.3	2942.9	4813.1	4182.4	4639.9	4289.7	5021.1	A0A178WJI0	(thale cress) hypothetical protein OS=Arabidopsis thaliana OX=3702 GN=AXX17_At1g73520 PE=4 SV=1	49051	Carbamidomethylation; Oxidation (M)	99.2	272.71	22	17	10	18	20	19	10	17	18	15	17	22	8	7	22	15	23	34	19	12	23	23	21	17	24
			3393.5	750.98	438.06			497.56	783.1	2187	A0A178WKL5	(thale cress) hypothetical protein OS=Arabidopsis thaliana OX=3702 GN=AXX17_At1g47890 PE=3 SV=1	17601	Oxidation (M)	99.1	260.65	39	0	0	0	39	39	39	0	0	39	39	39	10	6	0	0	0	58	35	26	0	0	33	34	47
3010.4	404.09	276.95	3093.5	2671.9	126.85	3563.6	503.93	4649.1	5261.3	4236.4	A0A5S9Y7I1	Sinigrinase OS=Arabidopsis thaliana OX=3702 GN=C24_LOCUS23225 PE=3 SV=1	60499	Carbamidomethylation; Oxidation (M)	99.1	208.32	9	9	7	7	9	9	5	9	9	9	9	9	4	3	18	21	14	16	18	21	20	19	33	31	19
3010.4	404.09	276.95	3093.5	2671.9	126.85	3563.6	503.93	4649.1	5261.3	4236.4	A0A654G484	Sinigrinase OS=Arabidopsis thaliana OX=3702 GN=AN1_LOCUS23346 PE=3 SV=1	61228	Carbamidomethylation; Oxidation (M)	99.1	208.32	9	9	7	7	9	9	5	9	9	9	9	9	4	3	18	21	14	16	18	21	20	19	33	31	19
3010.4	404.09	276.95	3093.5	2671.9	126.85	3563.6	503.93	4649.1	5261.3	4236.4	A0A7G2FHB3	(thale cress) hypothetical protein OS=Arabidopsis thaliana OX=3702 GN=AT9943_LOCUS20107 PE=3 SV=1	61206	Carbamidomethylation; Oxidation (M)	99.1	208.32	9	9	7	7	9	9	5	9	9	9	9	9	4	3	18	21	14	16	18	21	20	19	33	31	19
3010.4	404.09	276.95	3093.5	2671.9	126.85	3563.6	503.93	4649.1	5261.3	4236.4	Q9C5C2	Myrosinase 2 OS=Arabidopsis thaliana OX=3702 GN=TGG2 PE=1 SV=1	62732	Carbamidomethylation; Oxidation (M)	99.1	208.32	8	8	6	7	8	8	5	8	8	8	8	8	4	3	18	21	14	16	18	21	20	19	33	31	19
3010.4	404.09	276.95	3093.5	2671.9	126.85	3563.6	503.93	4649.1	5261.3	4236.4	A0A178UIY8	Thioglucosidase OS=Arabidopsis thaliana OX=3702 GN=At5g25980 PE=3 SV=1	35326	Carbamidomethylation; Oxidation (M)	99	208.32	15	15	11	12	15	15	9	15	15	15	15	15	4	3	18	21	14	16	18	21	20	19	33	31	19
269.62	353.44	367.4	306.16	336.88	227.47	531.93	269.84	346.45	410.29	396.85	P42036	40S ribosomal protein S14-3 OS=Arabidopsis thaliana OX=3702 GN=RPS14C PE=2 SV=2	16238	Oxidation (M)	99	236.5	40	26	24	26	40	26	24	26	40	40	26	26	6	1	20	18	18	26	19	22	20	17	29	22	19
269.62	353.44	367.4	306.16	336.88	227.47	531.93	269.84	346.45	410.29	396.85	A0A5S9XK54	40S ribosomal protein S14 OS=Arabidopsis thaliana OX=3702 GN=At3g52580 PE=3 SV=1	21373	Oxidation (M)	99	236.5	31	20	18	20	31	20	18	20	31	31	20	20	6	1	20	18	18	26	19	22	20	17	29	22	19
269.62	353.44	367.4	306.16	336.88	227.47	531.93	269.84	346.45	410.29	396.85	A0A654FG37	40S ribosomal protein S14 OS=Arabidopsis thaliana OX=3702 GN=At3g52580 PE=3 SV=1	21313	Oxidation (M)	99	236.5	31	20	18	20	31	20	18	20	31	31	20	20	6	1	20	18	18	26	19	22	20	17	29	22	19
8580.4	5620.9	7706.5	10048	6903.7	4806.8	9051	7929.4	8706.9	7798.8	9016.2	A0A654FFE4	(thale cress) hypothetical protein OS=Arabidopsis thaliana OX=3702 GN=At3g47070 PE=4 SV=1	10530		98.7	220.69	34	34	21	33	34	34	33	33	34	34	33	34	5	5	17	17	21	24	23	18	24	22	18	22	24
8580.4	5620.9	7706.5	10048	6903.7	4806.8	9051	7929.4	8706.9	7798.8	9016.2	Q9SD66	Thylakoid soluble phosphoprotein OS=Arabidopsis thaliana OX=3702 GN=F13I12.120 PE=1 SV=1	10530		98.7	220.69	34	34	21	33	34	34	33	33	34	34	33	34	5	5	17	17	21	24	23	18	24	22	18	22	24
8580.4	5620.9	7706.5	10048	6903.7	4806.8	9051	7929.4	8706.9	7798.8	9016.2	Q94CB6	Uncharacterized protein At3g47070 OS=Arabidopsis thaliana OX=3702 GN=At3g47070 PE=2 SV=1	10561		98.4	220.69	34	34	21	33	34	34	33	33	34	34	33	34	5	5	17	17	21	24	23	18	24	22	18	22	24
5264.8	3414.8	3924.6	5315.7	4034.1	2913.2	3169.5	4438.8	6699.7	5414.5	4973	A0A178WGD0	ZKT OS=Arabidopsis thaliana OX=3702 GN=AXX17_At1g50090 PE=4 SV=1	37410	Oxidation (M)	99.2	283.33	37	28	13	13	29	21	13	24	28	35	26	26	16	16	21	9	12	23	14	18	16	23	41	22	30
5264.8	3414.8	3924.6	5315.7	4034.1	2913.2	3169.5	4438.8	6699.7	5414.5	4973	Q94BS2	Protein MET1 chloroplastic OS=Arabidopsis thaliana OX=3702 GN=MET1 PE=1 SV=1	37410	Oxidation (M)	99.2	283.33	37	28	13	13	29	21	13	24	28	35	26	26	16	16	21	9	12	23	14	18	16	23	41	22	30
2297.2	1566.3	1874.9	221.56	0	1544.7	2134.8	236.43	0	2252.6	2658.7	A0A178WFM8	alanine transaminase OS=Arabidopsis thaliana OX=3702 GN=AXX17_At1g64740 PE=3 SV=1	53444	Carbamidomethylation; Oxidation (M)	99.2	285.02	23	16	10	12	15	14	10	20	20	20	16	16	9	3	21	12	13	18	11	12	24	19	44	27	28
2297.2	1566.3	1874.9	221.56	0	1544.7	2134.8	236.43	0	2252.6	2658.7	Q9S7E9	Glutamate--glyoxylate aminotransferase 2 OS=Arabidopsis thaliana OX=3702 GN=GGAT2 PE=1 SV=1	53444	Carbamidomethylation; Oxidation (M)	99.2	285.02	23	16	10	12	15	14	10	20	20	20	16	16	9	3	21	12	13	18	11	12	24	19	44	27	28
1846.8	730.23	0	2124.7	0	91.749	1358.9	2394.7	5067.6	1787.9	1346.7	Q8LEA5	thioredoxin-dependent peroxiredoxin OS=Arabidopsis thaliana OX=3702 PE=2 SV=1	29515		99.1	245.13	28	22	17	11	28	19	17	19	28	28	22	28	7	4	19	22	16	24	15	16	17	31	28	18	22
1846.8	730.23	0	2124.7	0	91.749	1358.9	2394.7	5067.6	1787.9	1346.7	Q9C5R8	2-Cys peroxiredoxin BAS1-like chloroplastic OS=Arabidopsis thaliana OX=3702 GN=At5g06290 PE=2 SV=3	29780		99.1	245.13	28	22	17	11	28	19	17	19	28	28	22	28	7	4	19	22	16	24	15	16	17	31	28	18	22
1846.8	730.23	0	2124.7	0	91.749	1358.9	2394.7	5067.6	1787.9	1346.7	A0A5S9Y1W2	thioredoxin-dependent peroxiredoxin OS=Arabidopsis thaliana OX=3702 GN=AT9943_LOCUS18470 PE=4 SV=1	29793		99.1	245.13	28	22	17	11	28	19	17	19	28	28	22	28	7	4	19	22	16	24	15	16	17	31	28	18	22
1846.8	730.23	0	2124.7	0	91.749	1358.9	2394.7	5067.6	1787.9	1346.7	A0A654FYS1	thioredoxin-dependent peroxiredoxin OS=Arabidopsis thaliana OX=3702 GN=AN1_LOCUS21445 PE=4 SV=1	29780		99.1	245.13	28	22	17	11	28	19	17	19	28	28	22	28	7	4	19	22	16	24	15	16	17	31	28	18	22
1846.8	730.23	0	2124.7	0	91.749	1358.9	2394.7	5067.6	1787.9	1346.7	A0A178ULP1	thioredoxin-dependent peroxiredoxin OS=Arabidopsis thaliana OX=3702 GN=AXX17_At5g05830 PE=4 SV=1	29733		99.1	245.13	28	22	17	11	28	19	17	19	28	28	22	28	7	4	19	22	16	24	15	16	17	31	28	18	22
3865.6	4859.6	6323.7	5103	4506	2415	4646.9	7585.6	7982.7	5633.5	6320.6	E0Y422	plastoquinol--plastocyanin reductase OS=Arabidopsis thaliana OX=3702 GN=At4g03280 PE=3 SV=1	24350		98.8	235.29	23	14	14	14	14	14	14	11	14	23	14	14	5	5	17	18	17	29	17	18	15	23	32	23	19
3865.6	4859.6	6323.7	5103	4506	2415	4646.9	7585.6	7982.7	5633.5	6320.6	Q9ZR03	Cytochrome b6-f complex iron-sulfur subunit chloroplastic OS=Arabidopsis thaliana OX=3702 GN=petC PE=1 SV=1	24366		98.8	235.29	23	14	14	14	14	14	14	11	14	23	14	14	5	5	17	18	17	29	17	18	15	23	32	23	19
3865.6	4859.6	6323.7	5103	4506	2415	4646.9	7585.6	7982.7	5633.5	6320.6	A0A178UTT2	plastoquinol--plastocyanin reductase OS=Arabidopsis thaliana OX=3702 GN=AXX17_At4g04070 PE=3 SV=1	24350		98.8	235.29	23	14	14	14	14	14	14	11	14	23	14	14	5	5	17	18	17	29	17	18	15	23	32	23	19
20223	17852	19133	19254	16915	15568	3356.5	15973	19696	11815	12263	A0A178VYR6	acetyl-CoA carboxytransferase OS=Arabidopsis thaliana OX=3702 GN=AXX17_At2g34880 PE=3 SV=1	85306	Oxidation (M)	99.2	264.45	19	14	11	15	13	13	10	11	8	14	13	12	14	14	23	21	23	19	15	15	21	20	22	26	22
20223	17852	19133	19254	16915	15568	3356.5	15973	19696	11815	12263	A0A7G2EI77	acetyl-CoA carboxytransferase OS=Arabidopsis thaliana OX=3702 GN=AT9943_LOCUS8809 PE=3 SV=1	85325	Oxidation (M)	99.2	264.45	19	14	11	15	13	13	10	11	8	14	13	12	14	14	23	21	23	19	15	15	21	20	22	26	22
20223	17852	19133	19254	16915	15568	3356.5	15973	19696	11815	12263	Q9LD43	Acetyl-coenzyme A carboxylase carboxyl transferase subunit alpha chloroplastic OS=Arabidopsis thaliana OX=3702 GN=CAC3 PE=1 SV=1	85306	Oxidation (M)	99.2	264.45	19	14	11	15	13	13	10	11	8	14	13	12	14	14	23	21	23	19	15	15	21	20	22	26	22
4788.8	4548.4	4851.9	4704.8	3639	3365.7	4928.5	3665.6	4149.3	5070.2	4791	A0A654G929	Glucose-1-phosphate adenylyltransferase OS=Arabidopsis thaliana OX=3702 GN=AN1_LOCUS25065 PE=3 SV=1	56697	Carbamidomethylation; Oxidation (M)	99.2	279.36	29	21	14	13	18	11	10	21	18	23	16	16	14	14	34	15	21	16	19	16	24	17	26	22	17
4788.8	4548.4	4851.9	4704.8	3639	3365.7	4928.5	3665.6	4149.3	5070.2	4791	A0A178UDC3	Glucose-1-phosphate adenylyltransferase OS=Arabidopsis thaliana OX=3702 GN=AXX17_At5g46810 PE=3 SV=1	56651	Carbamidomethylation; Oxidation (M)	99.2	279.36	29	21	14	13	18	11	10	21	18	23	16	16	14	14	34	15	21	16	19	16	24	17	26	22	17
4788.8	4548.4	4851.9	4704.8	3639	3365.7	4928.5	3665.6	4149.3	5070.2	4791	P55228	Glucose-1-phosphate adenylyltransferase small subunit chloroplastic OS=Arabidopsis thaliana OX=3702 GN=APS1 PE=2 SV=2	56651	Carbamidomethylation; Oxidation (M)	99.2	279.36	29	21	14	13	18	11	10	21	18	23	16	16	14	14	34	15	21	16	19	16	24	17	26	22	17
3117.6	1811.2	2179	3823.2	2310.1	1167.2	4365.2	3176.1	4338.9	3770.9	3665.1	Q9LZG0	Adenosine kinase 2 OS=Arabidopsis thaliana OX=3702 GN=ADK2 PE=1 SV=1	37846	Carbamidomethylation	99.1	290.06	20	20	20	20	20	20	17	20	20	20	20	20	7	7	19	15	19	19	16	14	29	21	22	30	23
3117.6	1811.2	2179	3823.2	2310.1	1167.2	4365.2	3176.1	4338.9	3770.9	3665.1	A0A178UGH7	Adenosine kinase OS=Arabidopsis thaliana OX=3702 GN=AXX17_At5g02520 PE=3 SV=1	37880	Carbamidomethylation	99.1	290.06	20	20	20	20	20	20	17	20	20	20	20	20	7	7	19	15	19	19	16	14	29	21	22	30	23
3117.6	1811.2	2179	3823.2	2310.1	1167.2	4365.2	3176.1	4338.9	3770.9	3665.1	A0A1P8BAP0	Adenosine kinase OS=Arabidopsis thaliana OX=3702 GN=ADK2 PE=1 SV=1	31989	Carbamidomethylation	99.1	290.06	24	24	23	24	24	24	21	24	24	24	24	24	7	7	19	15	19	19	16	14	29	21	22	30	23
3117.6	1811.2	2179	3823.2	2310.1	1167.2	4365.2	3176.1	4338.9	3770.9	3665.1	Q9SF85	Adenosine kinase 1 OS=Arabidopsis thaliana OX=3702 GN=ADK1 PE=1 SV=1	37836	Carbamidomethylation	99.1	290.06	20	20	20	20	20	20	17	20	20	20	20	20	7	7	19	15	19	19	16	14	29	21	22	30	23
3117.6	1811.2	2179	3823.2	2310.1	1167.2	4365.2	3176.1	4338.9	3770.9	3665.1	A0A178VJX9	Adenosine kinase OS=Arabidopsis thaliana OX=3702 GN=AXX17_At3g09490 PE=3 SV=1	37787	Carbamidomethylation	99.1	290.06	20	20	20	20	20	20	17	20	20	20	20	20	7	7	19	15	19	19	16	14	29	21	22	30	23
453.81	386.35	188.31	4054.2	1490.6	1206.6	261.15	304.1	1783.2	3532.2	2605.2	A0A654G1P4	Clp R domain-containing protein OS=Arabidopsis thaliana OX=3702 GN=AN1_LOCUS22315 PE=3 SV=1	108943	Oxidation (M)	99.2	321.73	21	6	5	5	17	10	6	5	4	15	18	14	18	15	6	6	9	42	26	19	9	5	29	40	35
453.81	386.35	188.31	4054.2	1490.6	1206.6	261.15	304.1	1783.2	3532.2	2605.2	Q9LF37	Chaperone protein ClpB3 chloroplastic OS=Arabidopsis thaliana OX=3702 GN=CLPB3 PE=1 SV=1	108943	Oxidation (M)	99.2	321.73	21	6	5	5	17	10	6	5	4	15	18	14	18	15	6	6	9	42	26	19	9	5	29	40	35
453.81	386.35	188.31	4054.2	1490.6	1206.6	261.15	304.1	1783.2	3532.2	2605.2	A0A178UCZ3	(thale cress) hypothetical protein OS=Arabidopsis thaliana OX=3702 GN=AXX17_At5g14960 PE=3 SV=1	108867	Oxidation (M)	99.2	321.73	21	6	5	5	17	10	6	5	4	15	18	14	18	15	6	6	9	42	26	19	9	5	29	40	35
3108.7	1235.1	2057.8	3015.4	1945.7	689.92	2554.5	2888.1	3459.8	2612.3	3208.3	A0A7G2FHE6	Cellulose synthase OS=Arabidopsis thaliana OX=3702 GN=AT9943_LOCUS21233 PE=3 SV=1	160396	Carbamidomethylation; Oxidation (M)	99.2	226.26	5	4	2	2	4	3	2	3	4	5	4	5	7	7	24	13	16	19	18	23	17	24	24	24	24
3108.7	1235.1	2057.8	3015.4	1945.7	689.92	2554.5	2888.1	3459.8	2612.3	3208.3	A0A178UIR5	Acid phosphatase 1-like OS=Arabidopsis thaliana OX=3702 GN=AXX17_At5g42130 PE=4 SV=1	31056	Carbamidomethylation; Oxidation (M)	99.2	226.26	28	23	12	8	21	17	12	17	20	28	20	28	7	7	24	13	16	19	18	23	17	24	24	24	24
3108.7	1235.1	2057.8	3015.4	1945.7	689.92	2554.5	2888.1	3459.8	2612.3	3208.3	Q9FNC4	HAD superfamily subfamily IIIB acid phosphatase OS=Arabidopsis thaliana OX=3702 GN=MRH10.13 PE=1 SV=1	31056	Carbamidomethylation; Oxidation (M)	99.2	226.26	28	23	12	8	21	17	12	17	20	28	20	28	7	7	24	13	16	19	18	23	17	24	24	24	24
3108.7	1235.1	2057.8	3015.4	1945.7	689.92	2554.5	2888.1	3459.8	2612.3	3208.3	Q8LC74	Vegetative storage protein-like OS=Arabidopsis thaliana OX=3702 PE=2 SV=1	31041	Carbamidomethylation; Oxidation (M)	99.1	226.26	28	23	12	8	21	17	12	17	20	28	20	28	7	7	24	13	16	19	18	23	17	24	24	24	24
							0				A0A7G2EHD2	(thale cress) hypothetical protein OS=Arabidopsis thaliana OX=3702 GN=AT9943_LOCUS8474 PE=3 SV=1	49108	Oxidation (M)	99.1	229.03	17	10	10	10	11	10	10	11	17	11	11	10	6	2	22	15	24	25	22	16	23	16	22	22	19
4339.7	5170.9	4600.9	4644.8	3234	3456.3	5908.9	3729.4	3795	4628.1	4211.8	Q38814	Thiamine thiazole synthase chloroplastic OS=Arabidopsis thaliana OX=3702 GN=THI1 PE=1 SV=1	36664	Oxidation (M)	99.1	233.04	25	25	10	15	25	13	10	25	16	25	25	15	7	7	22	24	17	26	12	17	23	19	23	24	18
4339.7	5170.9	4600.9	4644.8	3234	3456.3	5908.9	3729.4	3795	4628.1	4211.8	A0A5S9YEA7	Thiamine thiazole synthase chloroplastic OS=Arabidopsis thaliana OX=3702 GN=THI1 PE=3 SV=1	36643	Oxidation (M)	99.1	233.04	25	25	10	15	25	13	10	25	16	25	25	15	7	7	22	24	17	26	12	17	23	19	23	24	18
4339.7	5170.9	4600.9	4644.8	3234	3456.3	5908.9	3729.4	3795	4628.1	4211.8	A0A178UNL2	Thiamine thiazole synthase chloroplastic OS=Arabidopsis thaliana OX=3702 GN=THI1 PE=3 SV=1	36664	Oxidation (M)	99.1	233.04	25	25	10	15	25	13	10	25	16	25	25	15	7	7	22	24	17	26	12	17	23	19	23	24	18
2986.8	2165.3	2180	2721.7	1729.9	1526	3345.9	2404.8	2215.9	4190	3721.2	Q1WIQ6	NADP-dependent glyceraldehyde-3-phosphate dehydrogenase OS=Arabidopsis thaliana OX=3702 GN=ALDH11A3 PE=1 SV=2	53060	Carbamidomethylation; Oxidation (M); Acetylation (N-term)	99.2	309.17	29	22	15	14	22	20	11	26	22	22	23	22	12	12	20	17	14	27	15	11	26	20	22	29	23
2986.8	2165.3	2180	2721.7	1729.9	1526	3345.9	2404.8	2215.9	4190	3721.2	B9DHD2	AT2G24270 protein OS=Arabidopsis thaliana OX=3702 GN=At2g24270 PE=2 SV=1	53060	Carbamidomethylation; Oxidation (M); Acetylation (N-term)	99.2	309.17	29	22	15	14	22	20	11	26	22	22	23	22	12	12	20	17	14	27	15	11	26	20	22	29	23
2986.8	2165.3	2180	2721.7	1729.9	1526	3345.9	2404.8	2215.9	4190	3721.2	A0A384L3A7	ALDH11A3 OS=Arabidopsis thaliana OX=3702 GN=AXX17_At2g19920 PE=3 SV=1	53060	Carbamidomethylation; Oxidation (M); Acetylation (N-term)	99.2	309.17	29	22	15	14	22	20	11	26	22	22	23	22	12	12	20	17	14	27	15	11	26	20	22	29	23
2986.8	2165.3	2180	2721.7	1729.9	1526	3345.9	2404.8	2215.9	4190	3721.2	A0A2H1ZE23	Aldehyde dehydrogenase 11A3 OS=Arabidopsis thaliana OX=3702 GN=ALDH11A3 PE=1 SV=1	57756	Carbamidomethylation; Oxidation (M); Acetylation (N-term)	99.2	309.17	27	21	13	13	21	18	10	24	20	21	21	21	12	12	20	17	14	27	15	11	26	20	22	29	23
264.42	68.994	186.56	0	108.59		393.37	181.38	101.93	192.36	444.71	F4HV96	Eif4a-2 OS=Arabidopsis thaliana OX=3702 GN=EIF4A-2 PE=1 SV=1	46195	Carbamidomethylation; Oxidation (M); Acetylation (N-term)	99.2	230.06	22	18	15	16	18	18	8	20	14	16	18	20	9	2	22	15	23	27	19	6	28	18	24	18	24
264.42	68.994	186.56	0	108.59		393.37	181.38	101.93	192.36	444.71	P41377	Eukaryotic initiation factor 4A-2 OS=Arabidopsis thaliana OX=3702 GN=TIF4A-2 PE=1 SV=1	46763	Carbamidomethylation; Oxidation (M); Acetylation (N-term)	99.2	230.06	22	17	15	16	17	17	8	20	14	16	17	20	9	2	22	15	23	27	19	6	28	18	24	18	24
264.42	68.994	186.56	0	108.59		393.37	181.38	101.93	192.36	444.71	A0A178W4U1	eIF4A-2 OS=Arabidopsis thaliana OX=3702 GN=AXX17_At1g48730 PE=3 SV=1	46763	Carbamidomethylation; Oxidation (M); Acetylation (N-term)	99.2	230.06	22	17	15	16	17	17	8	20	14	16	17	20	9	2	22	15	23	27	19	6	28	18	24	18	24
1628	891.73	1366.1	1750.5	1137.2	510.28	1892.9	1869.2	2301.5	1915.4	2061.2	A0A178VWV6	(thale cress) hypothetical protein OS=Arabidopsis thaliana OX=3702 GN=AXX17_At2g19640 PE=4 SV=1	19812	Oxidation (M)	99.1	259.58	45	45	44	45	37	45	36	45	45	45	45	44	8	5	21	15	23	21	16	11	24	22	29	22	20
1628	891.73	1366.1	1750.5	1137.2	510.28	1892.9	1869.2	2301.5	1915.4	2061.2	O82230	Nucleoid-associated protein At2g24020 chloroplastic OS=Arabidopsis thaliana OX=3702 GN=STIC2 PE=1 SV=2	19812	Oxidation (M)	99.1	259.58	45	45	44	45	37	45	36	45	45	45	45	44	8	5	21	15	23	21	16	11	24	22	29	22	20
1750	657.78	1900.5	1763	1056.5	395.66	2391.7	1851.7	2547.8	2103.6	3460.5	A0A178VC94	Methylenetetrahydrofolate reductase OS=Arabidopsis thaliana OX=3702 GN=AXX17_At3g54370 PE=3 SV=1	66289	Oxidation (M)	99.2	261.2	21	18	14	16	18	15	8	18	17	18	20	21	10	7	23	8	19	24	18	5	25	21	25	30	25
1750	657.78	1900.5	1763	1056.5	395.66	2391.7	1851.7	2547.8	2103.6	3460.5	Q9SE60	Methylenetetrahydrofolate reductase (NADH) 1 OS=Arabidopsis thaliana OX=3702 GN=MTHFR1 PE=1 SV=1	66289	Oxidation (M)	99.2	261.2	21	18	14	16	18	15	8	18	17	18	20	21	10	7	23	8	19	24	18	5	25	21	25	30	25
3553.1	2704.2	3458.5	3626.1	2899.6	1615.5	3221.4	3375.6	4493.8	3395.5	5311.5	Q56YA5	Serine--glyoxylate aminotransferase OS=Arabidopsis thaliana OX=3702 GN=AGT1 PE=1 SV=2	44208	Carbamidomethylation; Oxidation (M); Acetylation (N-term)	99.1	209.26	17	15	15	15	17	11	7	17	15	15	15	15	7	7	21	19	21	21	19	10	16	15	27	22	31
3553.1	2704.2	3458.5	3626.1	2899.6	1615.5	3221.4	3375.6	4493.8	3395.5	5311.5	A0A178VX39	alanine--glyoxylate transaminase OS=Arabidopsis thaliana OX=3702 GN=AXX17_At2g08510 PE=3 SV=1	44208	Carbamidomethylation; Oxidation (M); Acetylation (N-term)	99.1	209.26	17	15	15	15	17	11	7	17	15	15	15	15	7	7	21	19	21	21	19	10	16	15	27	22	31
115.88	0	0	227.13	0		324.39	198.33	669.01	206.11	0	Q0WV25	Tubulin alpha-4 chain OS=Arabidopsis thaliana OX=3702 GN=TUBA4 PE=2 SV=2	49541	Carbamidomethylation; Oxidation (M)	99.2	274.43	23	18	12	14	18	14	8	20	22	22	18	18	9	2	23	17	16	27	16	7	25	23	30	15	23
115.88	0	0	227.13	0		324.39	198.33	669.01	206.11	0	P29511	Tubulin alpha-6 chain OS=Arabidopsis thaliana OX=3702 GN=TUBA6 PE=1 SV=1	49538	Carbamidomethylation; Oxidation (M)	99.2	274.43	23	18	12	14	18	14	8	20	22	22	18	18	9	2	23	17	16	27	16	7	25	23	30	15	23
115.88	0	0	227.13	0		324.39	198.33	669.01	206.11	0	A0A178W5L2	Tubulin alpha chain OS=Arabidopsis thaliana OX=3702 GN=AXX17_At1g04150 PE=3 SV=1	49541	Carbamidomethylation; Oxidation (M)	99.2	274.43	23	18	12	14	18	14	8	20	22	22	18	18	9	2	23	17	16	27	16	7	25	23	30	15	23
115.88	0	0	227.13	0		324.39	198.33	669.01	206.11	0	B9DGT7	Tubulin alpha-2 chain OS=Arabidopsis thaliana OX=3702 GN=TUBA2 PE=2 SV=2	49541	Carbamidomethylation; Oxidation (M)	99.2	274.43	23	18	12	14	18	14	8	20	22	22	18	18	9	2	23	17	16	27	16	7	25	23	30	15	23
115.88	0	0	227.13	0		324.39	198.33	669.01	206.11	0	A0A178UXP7	Tubulin alpha chain OS=Arabidopsis thaliana OX=3702 GN=AXX17_At4g17320 PE=3 SV=1	49538	Carbamidomethylation; Oxidation (M)	99.2	274.43	23	18	12	14	18	14	8	20	22	22	18	18	9	2	23	17	16	27	16	7	25	23	30	15	23
2623.2	974.79	1132.7	1946.9	1360.8	1308.8	1450.3	1468.3	2032.2	1991.7	2001.4	Q56ZI2	Patellin-2 OS=Arabidopsis thaliana OX=3702 GN=PATL2 PE=1 SV=2	76008	Oxidation (M); Acetylation (N-term)	99.2	320	33	26	10	12	24	15	18	22	23	28	20	21	18	17	31	7	17	23	13	15	21	23	32	18	21
4838.3	2812.5	3227.2	4596.7	3283.5	2389	2771.5	4143	5293.8	4556	4894.9	A0A5S9XMT1	Remorin OS=Arabidopsis thaliana OX=3702 GN=C24_LOCUS16380 PE=3 SV=1	23134	Acetylation (N-term)	99.1	215.88	40	36	18	22	40	28	14	40	35	40	33	28	7	7	18	16	20	26	20	14	21	19	22	22	23
4838.3	2812.5	3227.2	4596.7	3283.5	2389	2771.5	4143	5293.8	4556	4894.9	Q9M2D8	Uncharacterized protein At3g61260 OS=Arabidopsis thaliana OX=3702 GN=At3g61260 PE=1 SV=1	23144	Acetylation (N-term)	99.1	215.88	40	36	18	22	40	28	14	40	35	40	33	28	7	7	18	16	20	26	20	14	21	19	22	22	23
4838.3	2812.5	3227.2	4596.7	3283.5	2389	2771.5	4143	5293.8	4556	4894.9	A0A7G2ET40	(thale cress) hypothetical protein OS=Arabidopsis thaliana OX=3702 GN=AT9943_LOCUS14195 PE=3 SV=1	23144	Acetylation (N-term)	99.1	215.88	40	36	18	22	40	28	14	40	35	40	33	28	7	7	18	16	20	26	20	14	21	19	22	22	23
2080.3	1650.8	1603.2	3614.6	2194.7	1470.7	2513.2	1733.3	3233.2	3184.6	2995.5	A0A654EVM8	Heat shock 70 kDa protein 14 OS=Arabidopsis thaliana OX=3702 GN=AN1_LOCUS7039 PE=4 SV=1	90762	Carbamidomethylation; Oxidation (M)	99.2	278.89	17	12	11	9	13	11	10	12	13	14	14	14	11	11	21	11	12	24	20	18	19	16	24	29	26
2080.3	1650.8	1603.2	3614.6	2194.7	1470.7	2513.2	1733.3	3233.2	3184.6	2995.5	F4HQD4	Heat shock 70 kDa protein 15 OS=Arabidopsis thaliana OX=3702 GN=HSP70-15 PE=1 SV=1	91681	Carbamidomethylation; Oxidation (M)	99.2	278.89	16	11	10	9	13	11	10	12	12	14	14	14	11	11	21	11	12	24	20	18	19	16	24	29	26
2080.3	1650.8	1603.2	3614.6	2194.7	1470.7	2513.2	1733.3	3233.2	3184.6	2995.5	A0A178W9Z4	Hsp70-15 OS=Arabidopsis thaliana OX=3702 GN=AXX17_At1g74770 PE=4 SV=1	91795	Carbamidomethylation; Oxidation (M)	99.2	278.89	16	11	10	9	13	11	10	12	12	14	14	14	11	11	21	11	12	24	20	18	19	16	24	29	26
1403.5	501.4	1051.9	1383.9	1219.3	70.255	1071.2	791.43	1803.4	980.92	1755	Q9C8G5	CSC1-like protein ERD4 OS=Arabidopsis thaliana OX=3702 GN=ERD4 PE=1 SV=1	81935	Oxidation (M)	99.2	249.11	16	10	12	10	11	13	5	10	12	11	11	11	10	10	22	13	22	29	14	8	20	25	27	21	19
1403.5	501.4	1051.9	1383.9	1219.3	70.255	1071.2	791.43	1803.4	980.92	1755	A0A654EE31	CSC1-like protein ERD4 OS=Arabidopsis thaliana OX=3702 GN=AN1_LOCUS3076 PE=3 SV=1	81935	Oxidation (M)	99.2	249.11	16	10	12	10	11	13	5	10	12	11	11	11	10	10	22	13	22	29	14	8	20	25	27	21	19
988.35	905.36	1365.7	1075.4	706.73	335.35	1446.5	959.89	1059.2	1253.5	1805.1	A0A178V2T4	Aconitate hydratase OS=Arabidopsis thaliana OX=3702 GN=AXX17_At4g40960 PE=3 SV=1	98152	Oxidation (M)	99.2	272.13	12	9	9	10	10	6	6	11	9	9	11	10	10	6	22	14	24	18	17	15	21	21	21	18	28
988.35	905.36	1365.7	1075.4	706.73	335.35	1446.5	959.89	1059.2	1253.5	1805.1	Q42560	Aconitate hydratase 1 OS=Arabidopsis thaliana OX=3702 GN=ACO1 PE=1 SV=2	98152	Oxidation (M)	99.2	272.13	12	9	9	10	10	6	6	11	9	9	11	10	10	6	22	14	24	18	17	15	21	21	21	18	28
	65.623					24.651	0	50.088	14.899	110.86	A0A178VLH7	(thale cress) hypothetical protein OS=Arabidopsis thaliana OX=3702 GN=AXX17_At3g48240 PE=3 SV=1	27349	Carbamidomethylation; Oxidation (M)	99.2	234.05	35	14	21	26	19	18	9	22	22	29	25	29	11	1	17	21	18	19	19	15	16	19	24	27	23
	65.623					24.651	0	50.088	14.899	110.86	Q9M339	40S ribosomal protein S3-2 OS=Arabidopsis thaliana OX=3702 GN=RPS3B PE=1 SV=1	27349	Carbamidomethylation; Oxidation (M)	99.2	234.05	35	14	21	26	19	18	9	22	22	29	25	29	11	1	17	21	18	19	19	15	16	19	24	27	23
1580.8	1325.6	1537.8	2055.8	1955.7	1448.7	2842.2	1565.1	3283.3	2191.7	2566.4	A0A178VHJ5	Ketol-acid reductoisomerase OS=Arabidopsis thaliana OX=3702 GN=AXX17_At3g53150 PE=3 SV=1	63812	Carbamidomethylation; Oxidation (M)	99.2	235.76	17	10	11	12	15	12	12	15	14	17	15	13	8	8	17	13	19	18	20	12	28	19	30	22	20
1580.8	1325.6	1537.8	2055.8	1955.7	1448.7	2842.2	1565.1	3283.3	2191.7	2566.4	B9DH71	Ketol-acid reductoisomerase OS=Arabidopsis thaliana OX=3702 GN=At3g58610 PE=2 SV=1	63783	Carbamidomethylation; Oxidation (M)	99.2	235.76	17	10	11	12	15	12	12	15	14	17	15	13	8	8	17	13	19	18	20	12	28	19	30	22	20
1580.8	1325.6	1537.8	2055.8	1955.7	1448.7	2842.2	1565.1	3283.3	2191.7	2566.4	Q05758	Ketol-acid reductoisomerase chloroplastic OS=Arabidopsis thaliana OX=3702 GN=At3g58610 PE=1 SV=2	63812	Carbamidomethylation; Oxidation (M)	99.2	235.76	17	10	11	12	15	12	12	15	14	17	15	13	8	8	17	13	19	18	20	12	28	19	30	22	20
946.65	254.48	616.74	1150.3	834.93	277.83	1758.8	838.87	1167.9	969.37	1490.4	A0A654E7A9	Ribosomal protein L19 OS=Arabidopsis thaliana OX=3702 GN=AN1_LOCUS313 PE=3 SV=1	24606	Oxidation (M)	99.1	229.92	26	26	20	26	26	26	25	26	25	25	26	26	5	2	19	13	20	19	17	18	27	18	18	27	22
946.65	254.48	616.74	1150.3	834.93	277.83	1758.8	838.87	1167.9	969.37	1490.4	Q9SRX2	60S ribosomal protein L19-1 OS=Arabidopsis thaliana OX=3702 GN=RPL19A PE=2 SV=1	24606	Oxidation (M)	99.1	229.92	26	26	20	26	26	26	25	26	25	25	26	26	5	2	19	13	20	19	17	18	27	18	18	27	22
2763.7	1644	2550.8	1797.3	1956.3	959.39	2850.1	2335.7	3370.3	2480.7	2285.5	Q8LPR9	Protein TIC110 chloroplastic OS=Arabidopsis thaliana OX=3702 GN=TIC110 PE=1 SV=1	112120	Oxidation (M)	99.2	281.41	16	14	11	12	13	11	6	13	12	15	12	12	14	14	19	16	15	25	23	18	19	22	27	16	17
2763.7	1644	2550.8	1797.3	1956.3	959.39	2850.1	2335.7	3370.3	2480.7	2285.5	A0A654E9F5	Protein TIC110 chloroplastic OS=Arabidopsis thaliana OX=3702 GN=AN1_LOCUS753 PE=4 SV=1	112164	Oxidation (M)	99.2	281.41	16	14	11	12	13	11	6	13	12	15	12	12	14	14	19	16	15	25	23	18	19	22	27	16	17
2763.7	1644	2550.8	1797.3	1956.3	959.39	2850.1	2335.7	3370.3	2480.7	2285.5	A0A7G2DQP5	(thale cress) hypothetical protein OS=Arabidopsis thaliana OX=3702 GN=AT9943_LOCUS539 PE=4 SV=1	109349	Oxidation (M)	99.2	281.41	17	15	11	12	14	11	6	14	12	16	12	13	14	14	19	16	15	25	23	18	19	22	27	16	17
			0			106.67		65.957		54.213	A0A178VT49	(thale cress) hypothetical protein OS=Arabidopsis thaliana OX=3702 GN=AXX17_At2g27850 PE=3 SV=1	27519	Carbamidomethylation; Oxidation (M)	99.2	234.84	36	14	18	26	23	18	9	23	19	30	22	29	11	1	17	20	18	20	19	15	16	18	24	26	23
			0			106.67		65.957		54.213	Q9SIP7	40S ribosomal protein S3-1 OS=Arabidopsis thaliana OX=3702 GN=RPS3A PE=1 SV=1	27519	Carbamidomethylation; Oxidation (M)	99.2	234.84	36	14	18	26	23	18	9	23	19	30	22	29	11	1	17	20	18	20	19	15	16	18	24	26	23
4944.4	2053.3	3611	4028.3	3483.3	1563.6	3841.2	3461.7	6051.4	5194.4	5360.2	A0A654G2G0	Glucose-1-phosphate adenylyltransferase OS=Arabidopsis thaliana OX=3702 GN=AN1_LOCUS22714 PE=3 SV=1	57716	Carbamidomethylation; Oxidation (M)	99.2	270.33	26	13	12	15	18	18	11	16	17	21	18	21	13	13	22	14	20	19	19	11	22	18	23	22	25
4944.4	2053.3	3611	4028.3	3483.3	1563.6	3841.2	3461.7	6051.4	5194.4	5360.2	P55229	Glucose-1-phosphate adenylyltransferase large subunit 1 chloroplastic OS=Arabidopsis thaliana OX=3702 GN=ADG2 PE=1 SV=3	57674	Carbamidomethylation; Oxidation (M)	99.2	270.33	26	13	12	15	18	18	11	16	17	21	18	21	13	13	22	14	20	19	19	11	22	18	23	22	25
4944.4	2053.3	3611	4028.3	3483.3	1563.6	3841.2	3461.7	6051.4	5194.4	5360.2	A0A178UL90	Glucose-1-phosphate adenylyltransferase OS=Arabidopsis thaliana OX=3702 GN=AXX17_At5g19100 PE=3 SV=1	57689	Carbamidomethylation; Oxidation (M)	99.2	270.33	26	13	12	15	18	18	11	16	17	21	18	21	13	13	22	14	20	19	19	11	22	18	23	22	25
1711	1102.3	1176.1	2479	1238.5	671.99	2868.6	2654.1	4162.8	1895.4	2981.3	P25696	Bifunctional enolase 2/transcriptional activator OS=Arabidopsis thaliana OX=3702 GN=ENO2 PE=1 SV=1	47719	Carbamidomethylation; Oxidation (M)	99.2	301.72	34	21	15	15	26	20	11	22	31	34	27	22	11	11	21	11	14	31	15	5	25	28	30	17	18
1711	1102.3	1176.1	2479	1238.5	671.99	2868.6	2654.1	4162.8	1895.4	2981.3	A0A178VT47	phosphopyruvate hydratase OS=Arabidopsis thaliana OX=3702 GN=AXX17_At2g33250 PE=3 SV=1	47719	Carbamidomethylation; Oxidation (M)	99.2	301.72	34	21	15	15	26	20	11	22	31	34	27	22	11	11	21	11	14	31	15	5	25	28	30	17	18
4078.2	6666.4	4274.8	2477.6	2981	1033.2	3245.2	5749.5	3366.1	7341.8	7577.8	A0A178UGL7	phosphoglucomutase (alpha-D-glucose-1 6-bisphosphate-dependent) OS=Arabidopsis thaliana OX=3702 GN=AXX17_At5g50680 PE=3 SV=1	68019	Oxidation (M)	99.2	254.8	20	16	12	15	17	14	9	17	18	17	19	18	10	10	27	17	21	24	15	13	20	19	23	19	16
4078.2	6666.4	4274.8	2477.6	2981	1033.2	3245.2	5749.5	3366.1	7341.8	7577.8	Q9SCY0	Phosphoglucomutase chloroplastic OS=Arabidopsis thaliana OX=3702 GN=PGMP PE=1 SV=2	67989	Oxidation (M)	99.2	254.8	20	16	12	15	17	14	9	17	18	17	19	18	10	10	27	17	21	24	15	13	20	19	23	19	16
359.08	84.607	486.89	314.22	0		847.16	954.49	618.15	91.404	474.77	A0A178ULS6	EF1_GNE domain-containing protein OS=Arabidopsis thaliana OX=3702 GN=AXX17_At5g19430 PE=3 SV=1	24227	Oxidation (M)	99.1	228.56	31	31	24	24	31	24	10	25	31	31	30	30	6	3	20	12	19	23	10	11	31	26	24	17	20
359.08	84.607	486.89	314.22	0		847.16	954.49	618.15	91.404	474.77	Q9SCX3	Elongation factor 1-beta 2 OS=Arabidopsis thaliana OX=3702 GN=At5g19510 PE=1 SV=1	24201	Oxidation (M)	99.1	228.56	31	31	24	24	31	24	10	25	31	31	30	30	6	3	20	12	19	23	10	11	31	26	24	17	20
359.08	84.607	486.89	314.22	0		847.16	954.49	618.15	91.404	474.77	A0A5S9Y678	(thale cress) hypothetical protein OS=Arabidopsis thaliana OX=3702 GN=AT9943_LOCUS19578 PE=3 SV=1	24201	Oxidation (M)	99.1	228.56	31	31	24	24	31	24	10	25	31	31	30	30	6	3	20	12	19	23	10	11	31	26	24	17	20
6516.1	5049.4	5569.6	5426.4	4787.7	3627.5	5938.2	5007.8	6458.8	6103.4	6433.3	Q9SEU8	Thioredoxin M2 chloroplastic OS=Arabidopsis thaliana OX=3702 GN=TRXM2 PE=1 SV=2	20312		98.8	233.56	20	20	19	19	20	20	19	20	20	20	20	20	5	5	22	20	21	16	15	15	23	17	23	21	19
6516.1	5049.4	5569.6	5426.4	4787.7	3627.5	5938.2	5007.8	6458.8	6103.4	6433.3	A0A654FLK3	Thioredoxin domain-containing protein OS=Arabidopsis thaliana OX=3702 GN=AN1_LOCUS17159 PE=4 SV=1	20339		98.8	233.56	20	20	19	19	20	20	19	20	20	20	20	20	5	5	22	20	21	16	15	15	23	17	23	21	19
6516.1	5049.4	5569.6	5426.4	4787.7	3627.5	5938.2	5007.8	6458.8	6103.4	6433.3	A0A7G2EZV8	(thale cress) hypothetical protein OS=Arabidopsis thaliana OX=3702 GN=AT9943_LOCUS14752 PE=4 SV=1	20360		98.8	233.56	20	20	19	19	20	20	19	20	20	20	20	20	5	5	22	20	21	16	15	15	23	17	23	21	19
6516.1	5049.4	5569.6	5426.4	4787.7	3627.5	5938.2	5007.8	6458.8	6103.4	6433.3	A0A5S9XPK2	Thioredoxin domain-containing protein OS=Arabidopsis thaliana OX=3702 GN=C24_LOCUS17036 PE=4 SV=1	20312		98.8	233.56	20	20	19	19	20	20	19	20	20	20	20	20	5	5	22	20	21	16	15	15	23	17	23	21	19
6516.1	5049.4	5569.6	5426.4	4787.7	3627.5	5938.2	5007.8	6458.8	6103.4	6433.3	A0A178V0B8	ATHM2 OS=Arabidopsis thaliana OX=3702 GN=AXX17_At4g04460 PE=4 SV=1	20298		98.8	233.56	20	20	19	19	20	20	19	20	20	20	20	20	5	5	22	20	21	16	15	15	23	17	23	21	19
6516.1	5049.4	5569.6	5426.4	4787.7	3627.5	5938.2	5007.8	6458.8	6103.4	6433.3	F4JG94	Thioredoxin superfamily protein OS=Arabidopsis thaliana OX=3702 GN=ATHM2 PE=1 SV=1	7926		98.4	233.56	53	53	49	49	53	53	49	53	53	53	53	53	5	5	22	20	21	16	15	15	23	17	23	21	19
4747.5	5331.4	6050.7	3157.9	2608.5	1255.6	8240.5	6969.6	4153.1	2960	1396.2	A0A178V808	NADPH-protochlorophyllide oxidoreductase OS=Arabidopsis thaliana OX=3702 GN=AXX17_At4g31570 PE=3 SV=1	43359		99.2	258.13	20	20	14	18	16	12	10	18	16	18	14	14	10	6	25	23	26	16	15	6	29	23	17	16	13
4747.5	5331.4	6050.7	3157.9	2608.5	1255.6	8240.5	6969.6	4153.1	2960	1396.2	P21218	Protochlorophyllide reductase B chloroplastic OS=Arabidopsis thaliana OX=3702 GN=PORB PE=1 SV=3	43359		99.2	258.13	20	20	14	18	16	12	10	18	16	18	14	14	10	6	25	23	26	16	15	6	29	23	17	16	13
1289.9	1267.6	1571.2	1250.3	1091.4	1112.4	1136	1194.4	1504.6	1316.5	1793.1	A0A654ERJ3	14_3_3 domain-containing protein OS=Arabidopsis thaliana OX=3702 GN=AN1_LOCUS6875 PE=3 SV=1	29162	Oxidation (M); Acetylation (N-term)	99.2	261.37	48	25	17	23	31	19	19	29	34	34	37	39	12	6	16	10	18	20	13	9	21	19	27	23	32
1289.9	1267.6	1571.2	1250.3	1091.4	1112.4	1136	1194.4	1504.6	1316.5	1793.1	Q01525	14-3-3-like protein GF14 omega OS=Arabidopsis thaliana OX=3702 GN=GRF2 PE=1 SV=2	29162	Oxidation (M); Acetylation (N-term)	99.2	261.37	48	25	17	23	31	19	19	29	34	34	37	39	12	6	16	10	18	20	13	9	21	19	27	23	32
176.02	0	108.87	320.65	170.45	0	263.76	231.51	207.74	130.48	488.29	A0A384KVG9	Plasma membrane ATPase OS=Arabidopsis thaliana OX=3702 GN=AXX17_At5g62210 PE=3 SV=1	105123	Oxidation (M)	99.2	265.36	15	11	8	8	11	9	8	10	9	9	10	14	13	4	21	16	18	25	18	11	27	20	18	14	20
176.02	0	108.87	320.65	170.45	0	263.76	231.51	207.74	130.48	488.29	Q9LV11	ATPase 11 plasma membrane-type OS=Arabidopsis thaliana OX=3702 GN=AHA11 PE=1 SV=1	105123	Oxidation (M)	99.2	265.36	15	11	8	8	11	9	8	10	9	9	10	14	13	4	21	16	18	25	18	11	27	20	18	14	20
176.02	0	108.87	320.65	170.45	0	263.76	231.51	207.74	130.48	488.29	Q53XH7	Plasma membrane ATPase OS=Arabidopsis thaliana OX=3702 PE=2 SV=1	105123	Oxidation (M)	99.2	265.36	15	11	8	8	11	9	8	10	9	9	10	14	13	4	21	16	18	25	18	11	27	20	18	14	20
2509.4	1333.9	1218.7	2465.6	1477.3	852.62	2568.1	2448.2	2739.6	2322	1943.6	A0A178UM82	Pyruvate dehydrogenase E1 component subunit beta OS=Arabidopsis thaliana OX=3702 GN=AXX17_At5g49650 PE=4 SV=1	39176	Oxidation (M)	99.2	268.28	25	14	12	12	17	15	12	12	19	23	12	12	7	7	16	12	18	23	21	13	21	21	21	22	17
2509.4	1333.9	1218.7	2465.6	1477.3	852.62	2568.1	2448.2	2739.6	2322	1943.6	Q38799	Pyruvate dehydrogenase E1 component subunit beta-1 mitochondrial OS=Arabidopsis thaliana OX=3702 GN=PDH2 PE=1 SV=2	39176	Oxidation (M)	99.2	268.28	25	14	12	12	17	15	12	12	19	23	12	12	7	7	16	12	18	23	21	13	21	21	21	22	17
2509.4	1333.9	1218.7	2465.6	1477.3	852.62	2568.1	2448.2	2739.6	2322	1943.6	A0A654GAS7	Pyruvate dehydrogenase E1 component subunit beta OS=Arabidopsis thaliana OX=3702 GN=AN1_LOCUS25330 PE=4 SV=1	39116	Oxidation (M)	99.2	268.28	25	14	12	12	17	15	12	12	19	23	12	12	7	7	16	12	18	23	21	13	21	21	21	22	17
720.38	798.97	1110.3	2023.2	1560.3	1043.9	1356	1120.1	2918.1	2806.3	4223.2	B9DHU0	catalase (Fragment) OS=Arabidopsis thaliana OX=3702 GN=At1g20620 PE=2 SV=1	53015	Carbamidomethylation	99.2	260.65	18	12	12	14	16	13	12	13	12	18	18	16	9	6	16	12	17	23	16	14	19	16	25	26	20
720.38	798.97	1110.3	2023.2	1560.3	1043.9	1356	1120.1	2918.1	2806.3	4223.2	B9DG18	catalase OS=Arabidopsis thaliana OX=3702 GN=CAT3 PE=1 SV=1	55968	Carbamidomethylation	99.2	260.65	17	11	11	13	15	12	11	12	12	17	17	15	9	6	16	12	17	23	16	14	19	16	25	26	20
720.38	798.97	1110.3	2023.2	1560.3	1043.9	1356	1120.1	2918.1	2806.3	4223.2	A0A178WQI0	catalase OS=Arabidopsis thaliana OX=3702 GN=AXX17_At1g21600 PE=3 SV=1	56681	Carbamidomethylation	99.2	260.65	16	11	11	13	15	12	11	12	12	16	16	15	9	6	16	12	17	23	16	14	19	16	25	26	20
720.38	798.97	1110.3	2023.2	1560.3	1043.9	1356	1120.1	2918.1	2806.3	4223.2	A0A5S9VCL0	catalase OS=Arabidopsis thaliana OX=3702 GN=AT9943_LOCUS1782 PE=3 SV=1	56695	Carbamidomethylation	99.2	260.65	16	11	11	13	15	12	11	12	12	16	16	15	9	6	16	12	17	23	16	14	19	16	25	26	20
720.38	798.97	1110.3	2023.2	1560.3	1043.9	1356	1120.1	2918.1	2806.3	4223.2	Q42547	Catalase-3 OS=Arabidopsis thaliana OX=3702 GN=CAT3 PE=1 SV=3	56695	Carbamidomethylation	99.2	260.65	16	11	11	13	15	12	11	12	12	16	16	15	9	6	16	12	17	23	16	14	19	16	25	26	20
720.38	798.97	1110.3	2023.2	1560.3	1043.9	1356	1120.1	2918.1	2806.3	4223.2	A0A654ECE2	catalase OS=Arabidopsis thaliana OX=3702 GN=AN1_LOCUS2193 PE=3 SV=1	61154	Carbamidomethylation	99.2	260.65	15	10	10	12	14	11	10	11	11	15	15	14	9	6	16	12	17	23	16	14	19	16	25	26	20
720.38	798.97	1110.3	2023.2	1560.3	1043.9	1356	1120.1	2918.1	2806.3	4223.2	A0A1P8AWT7	catalase OS=Arabidopsis thaliana OX=3702 GN=CAT3 PE=1 SV=1	63560	Carbamidomethylation	99.2	260.65	15	10	10	11	13	11	10	11	10	15	15	13	9	6	16	12	17	23	16	14	19	16	25	26	20
5651.9	1727.5	2700.4	3978.9	2234.7	2052.9	2679.1	3066.6	5277.5	5459.4	5581.7	A0A178UE59	DDE2 OS=Arabidopsis thaliana OX=3702 GN=AXX17_At5g40520 PE=4 SV=1	58183	Carbamidomethylation; Oxidation (M)	99.2	285.92	28	16	11	10	13	14	11	11	23	20	19	17	13	13	21	13	15	17	18	14	13	18	27	23	24
5651.9	1727.5	2700.4	3978.9	2234.7	2052.9	2679.1	3066.6	5277.5	5459.4	5581.7	A0A7G2FJP2	(thale cress) hypothetical protein OS=Arabidopsis thaliana OX=3702 GN=AT9943_LOCUS21106 PE=4 SV=1	58223	Carbamidomethylation; Oxidation (M)	99.2	285.92	28	16	11	10	13	14	11	11	23	20	19	17	13	13	21	13	15	17	18	14	13	18	27	23	24
5651.9	1727.5	2700.4	3978.9	2234.7	2052.9	2679.1	3066.6	5277.5	5459.4	5581.7	Q96242	Allene oxide synthase chloroplastic OS=Arabidopsis thaliana OX=3702 GN=CYP74A PE=1 SV=3	58197	Carbamidomethylation; Oxidation (M)	99.2	285.92	28	16	11	10	13	14	11	11	23	20	19	17	13	13	21	13	15	17	18	14	13	18	27	23	24
2645.3	2632.8	2709.2	2466.9	2290.1	1959.3	2544.7	2214.6	3352.6	3054.3	3184.1	A0A5S9WPJ2	Pyr_redox_2 domain-containing protein OS=Arabidopsis thaliana OX=3702 GN=C24_LOCUS5277 PE=4 SV=1	52488	Oxidation (M)	99.2	261.59	25	20	11	19	18	15	11	20	23	23	22	20	10	10	19	13	21	19	12	13	17	19	26	20	23
2645.3	2632.8	2709.2	2466.9	2290.1	1959.3	2544.7	2214.6	3352.6	3054.3	3184.1	F4I576	Monodehydroascorbate reductase 6 OS=Arabidopsis thaliana OX=3702 GN=MDAR6 PE=1 SV=1	52115	Oxidation (M)	99.2	261.59	25	21	11	19	18	15	11	20	23	23	22	20	10	10	19	13	21	19	12	13	17	19	26	20	23
2645.3	2632.8	2709.2	2466.9	2290.1	1959.3	2544.7	2214.6	3352.6	3054.3	3184.1	B9DGR6	AT1G63940 protein OS=Arabidopsis thaliana OX=3702 GN=At1g63940 PE=2 SV=1	52502	Oxidation (M)	99.2	261.59	25	20	11	19	18	15	11	20	23	23	22	20	10	10	19	13	21	19	12	13	17	19	26	20	23
2645.3	2632.8	2709.2	2466.9	2290.1	1959.3	2544.7	2214.6	3352.6	3054.3	3184.1	A0A384KW24	MDAR6 OS=Arabidopsis thaliana OX=3702 GN=AXX17_At1g57390 PE=4 SV=1	52502	Oxidation (M)	99.2	261.59	25	20	11	19	18	15	11	20	23	23	22	20	10	10	19	13	21	19	12	13	17	19	26	20	23
2645.3	2632.8	2709.2	2466.9	2290.1	1959.3	2544.7	2214.6	3352.6	3054.3	3184.1	P92947	Monodehydroascorbate reductase chloroplastic/mitochondrial OS=Arabidopsis thaliana OX=3702 GN=MDAR5 PE=1 SV=3	53302	Oxidation (M)	99.2	261.59	25	20	11	18	18	15	11	19	23	23	21	19	10	10	19	13	21	19	12	13	17	19	26	20	23
2645.3	2632.8	2709.2	2466.9	2290.1	1959.3	2544.7	2214.6	3352.6	3054.3	3184.1	A0A178WFH3	(thale cress) hypothetical protein OS=Arabidopsis thaliana OX=3702 GN=AXX17_At1g57390 PE=4 SV=1	53302	Oxidation (M)	99.2	261.59	25	20	11	18	18	15	11	19	23	23	21	19	10	10	19	13	21	19	12	13	17	19	26	20	23
14571	13097	13644	14075	13243	10015	17876	11966	14881	15249	20294	A0A5S9WXW8	AAI domain-containing protein OS=Arabidopsis thaliana OX=3702 GN=At2g10940 PE=3 SV=1	27592	Carbamidomethylation	99	181.27	19	15	11	11	12	7	7	15	15	15	12	11	5	5	18	19	15	17	16	12	19	20	24	22	20
14571	13097	13644	14075	13243	10015	17876	11966	14881	15249	20294	A0A178VQX2	AAI domain-containing protein OS=Arabidopsis thaliana OX=3702 GN=At2g10940 PE=3 SV=1	28620	Carbamidomethylation	99	181.27	19	15	10	10	11	7	7	15	15	15	11	10	5	5	18	19	15	17	16	12	19	20	24	22	20
14571	13097	13644	14075	13243	10015	17876	11966	14881	15249	20294	Q9SKI0	At2g10940/F15K19.1 OS=Arabidopsis thaliana OX=3702 GN=At2g10940/F15K19.1 PE=1 SV=1	29648	Carbamidomethylation	99	181.27	18	14	10	10	11	7	7	14	14	14	11	10	5	5	18	19	15	17	16	12	19	20	24	22	20
14571	13097	13644	14075	13243	10015	17876	11966	14881	15249	20294	A0A654ESF6	AAI domain-containing protein OS=Arabidopsis thaliana OX=3702 GN=At2g10940 PE=3 SV=1	29648	Carbamidomethylation	99	181.27	18	14	10	10	11	7	7	14	14	14	11	10	5	5	18	19	15	17	16	12	19	20	24	22	20
											Q56WH1	Tubulin alpha-3 chain OS=Arabidopsis thaliana OX=3702 GN=TUBA3 PE=1 SV=2	49654	Carbamidomethylation; Oxidation (M)	99.1	246.16	19	14	8	14	14	14	8	15	17	17	14	14	8	0	20	15	17	22	17	7	25	21	23	14	19
											B9DHQ0	Tubulin alpha-5 chain OS=Arabidopsis thaliana OX=3702 GN=TUBA5 PE=1 SV=2	49654	Carbamidomethylation; Oxidation (M)	99.1	246.16	19	14	8	14	14	14	8	15	17	17	14	14	8	0	20	15	17	22	17	7	25	21	23	14	19
											A0A178UTQ9	Tubulin alpha chain OS=Arabidopsis thaliana OX=3702 GN=AXX17_At5g19690 PE=3 SV=1	49654	Carbamidomethylation; Oxidation (M)	99.1	246.16	19	14	8	14	14	14	8	15	17	17	14	14	8	0	20	15	17	22	17	7	25	21	23	14	19
			0			0		0	0	0	A0A7G2F261	(thale cress) hypothetical protein OS=Arabidopsis thaliana OX=3702 GN=AT9943_LOCUS17167 PE=3 SV=1	62145	Oxidation (M)	99.2	280.37	22	11	10	12	13	10	7	15	13	18	19	16	11	2	20	8	19	18	20	14	16	19	25	16	25
			0			0		0	0	0	A0A5S9XXW6	CYTOSOL_AP domain-containing protein OS=Arabidopsis thaliana OX=3702 GN=C24_LOCUS19787 PE=3 SV=1	61335	Oxidation (M)	99.2	280.37	22	11	10	12	14	10	8	15	13	18	20	16	11	2	20	8	19	18	20	14	16	19	25	16	25
			0			0		0	0	0	A0A654FUF0	CYTOSOL_AP domain-containing protein OS=Arabidopsis thaliana OX=3702 GN=AN1_LOCUS19893 PE=3 SV=1	61307	Oxidation (M)	99.2	280.37	22	11	10	12	14	10	8	15	13	18	20	16	11	2	20	8	19	18	20	14	16	19	25	16	25
			0			0		0	0	0	Q944P7	Leucine aminopeptidase 2 chloroplastic OS=Arabidopsis thaliana OX=3702 GN=LAP2 PE=2 SV=2	61307	Oxidation (M)	99.2	280.37	22	11	10	12	14	10	8	15	13	18	20	16	11	2	20	8	19	18	20	14	16	19	25	16	25
3917.6	2981.9	4280.9	4163	3434.4	1702	5081.6	3944.2	4716	4551.3	5251.2	B9DG17	40S ribosomal protein SA OS=Arabidopsis thaliana OX=3702 GN=P40 PE=1 SV=1	31981	Carbamidomethylation; Oxidation (M); Acetylation (N-term)	99.1	247.19	26	19	13	19	22	23	13	22	22	22	19	26	6	6	20	13	18	19	18	14	21	15	20	17	21
3917.6	2981.9	4280.9	4163	3434.4	1702	5081.6	3944.2	4716	4551.3	5251.2	A0A178WNA1	40S ribosomal protein SA OS=Arabidopsis thaliana OX=3702 GN=AXX17_At1g66550 PE=3 SV=1	32291	Carbamidomethylation; Oxidation (M); Acetylation (N-term)	99.1	247.19	26	19	13	19	21	23	13	21	21	21	19	26	6	6	20	13	18	19	18	14	21	15	20	17	21
3917.6	2981.9	4280.9	4163	3434.4	1702	5081.6	3944.2	4716	4551.3	5251.2	Q08682	40S ribosomal protein Sa-1 OS=Arabidopsis thaliana OX=3702 GN=RPSaA PE=1 SV=3	32291	Carbamidomethylation; Oxidation (M); Acetylation (N-term)	99.1	247.19	26	19	13	19	21	23	13	21	21	21	19	26	6	6	20	13	18	19	18	14	21	15	20	17	21
8028.6	5271.7	6236.2	6823.2	4395.9	3996.1	6530	11395	8150.4	6256.1	8422.7	P93014	30S ribosomal protein S5 chloroplastic OS=Arabidopsis thaliana OX=3702 GN=rps5 PE=2 SV=1	32645	Carbamidomethylation; Oxidation (M)	99.2	242.72	34	31	21	25	28	21	18	27	21	34	27	28	10	10	20	11	15	25	17	12	18	16	24	15	22
8028.6	5271.7	6236.2	6823.2	4395.9	3996.1	6530	11395	8150.4	6256.1	8422.7	A0A654F988	S5 DRBM domain-containing protein OS=Arabidopsis thaliana OX=3702 GN=AN1_LOCUS9818 PE=3 SV=1	32645	Carbamidomethylation; Oxidation (M)	99.2	242.72	34	31	21	25	28	21	18	27	21	34	27	28	10	10	20	11	15	25	17	12	18	16	24	15	22
8028.6	5271.7	6236.2	6823.2	4395.9	3996.1	6530	11395	8150.4	6256.1	8422.7	A0A178VN84	(thale cress) hypothetical protein OS=Arabidopsis thaliana OX=3702 GN=At2g33800 PE=3 SV=1	32655	Carbamidomethylation; Oxidation (M)	99.2	242.72	34	31	21	25	28	21	18	27	21	34	27	28	10	10	20	11	15	25	17	12	18	16	24	15	22
9631.3	7235.1	8105	7616.9	6176.4	4730.8	10713	7934.9	8626.1	7933.3	9226.7	Q03251	Glycine-rich RNA-binding protein 8 OS=Arabidopsis thaliana OX=3702 GN=RBG8 PE=1 SV=1	16579	Oxidation (M)	99.1	195.7	33	28	28	33	28	28	28	28	28	28	28	28	4	4	19	14	19	17	14	15	24	20	18	15	20
9631.3	7235.1	8105	7616.9	6176.4	4730.8	10713	7934.9	8626.1	7933.3	9226.7	A0A384L218	GRP8 OS=Arabidopsis thaliana OX=3702 GN=AXX17_At4g44660 PE=4 SV=1	16579	Oxidation (M)	99.1	195.7	33	28	28	33	28	28	28	28	28	28	28	28	4	4	19	14	19	17	14	15	24	20	18	15	20
8409	2514.6	5988.6	13361	7053	2596.9	9595.2	12877	15456	7081.4	10585	A0A178WGP6	Photosystem II 10 kDa polypeptide chloroplastic OS=Arabidopsis thaliana OX=3702 GN=At1g79040 PE=3 SV=1	9776	Oxidation (M)	98.8	153.71	34	34	24	24	33	34	25	34	33	33	33	34	4	4	12	13	14	21	13	10	20	24	26	16	23
8409	2514.6	5988.6	13361	7053	2596.9	9595.2	12877	15456	7081.4	10585	Q0WWI7	Photosystem II 10 kDa polypeptide chloroplastic OS=Arabidopsis thaliana OX=3702 GN=At1g79040 PE=2 SV=1	14586	Oxidation (M)	98.7	153.71	22	22	16	16	21	22	16	22	21	21	21	22	4	4	12	13	14	21	13	10	20	24	26	16	23
8409	2514.6	5988.6	13361	7053	2596.9	9595.2	12877	15456	7081.4	10585	A0A384LAE0	Photosystem II 10 kDa polypeptide chloroplastic OS=Arabidopsis thaliana OX=3702 GN=AXX17_At1g73790 PE=3 SV=1	14586	Oxidation (M)	98.7	153.71	22	22	16	16	21	22	16	22	21	21	21	22	4	4	12	13	14	21	13	10	20	24	26	16	23
8409	2514.6	5988.6	13361	7053	2596.9	9595.2	12877	15456	7081.4	10585	P27202	Photosystem II 10 kDa polypeptide chloroplastic OS=Arabidopsis thaliana OX=3702 GN=PSBR PE=1 SV=1	14586	Oxidation (M)	98.7	153.71	22	22	16	16	21	22	16	22	21	21	21	22	4	4	12	13	14	21	13	10	20	24	26	16	23
4348.9	3769.6	3902.3	6685.1	4444.5	2433.9	6547.7	4209.5	7152.3	6270.3	6525.4	A0A7G2EQ94	(thale cress) hypothetical protein OS=Arabidopsis thaliana OX=3702 GN=AT9943_LOCUS12757 PE=3 SV=1	114816	Oxidation (M)	99.2	238.16	9	5	5	6	7	7	5	6	6	6	7	8	9	9	13	14	15	25	18	11	17	16	20	20	22
1514.3	1164.3	2413.1	2428.8	1794.1	923.7	2059.1	1446.3	2892.1	2217.4	2831.3	A0A7G2ESL0	(thale cress) hypothetical protein OS=Arabidopsis thaliana OX=3702 GN=AT9943_LOCUS14067 PE=3 SV=1	77489	Oxidation (M)	99.2	249.29	19	17	16	15	15	15	11	19	13	16	15	19	10	10	18	15	15	23	12	12	21	17	19	18	20
1514.3	1164.3	2413.1	2428.8	1794.1	923.7	2059.1	1446.3	2892.1	2217.4	2831.3	A0A654FJD3	Rhodanese domain-containing protein OS=Arabidopsis thaliana OX=3702 GN=AN1_LOCUS16358 PE=4 SV=1	73933	Oxidation (M)	99.2	249.29	19	18	17	16	16	16	12	19	14	17	16	19	10	10	18	15	15	23	12	12	21	17	19	18	20
1514.3	1164.3	2413.1	2428.8	1794.1	923.7	2059.1	1446.3	2892.1	2217.4	2831.3	A0A178VC12	Rhodanese domain-containing protein OS=Arabidopsis thaliana OX=3702 GN=AXX17_At3g54180 PE=4 SV=1	73521	Oxidation (M)	99.2	249.29	20	18	17	16	16	16	12	20	14	17	16	20	10	10	18	15	15	23	12	12	21	17	19	18	20
1514.3	1164.3	2413.1	2428.8	1794.1	923.7	2059.1	1446.3	2892.1	2217.4	2831.3	A0A5S9XP31	Rhodanese domain-containing protein OS=Arabidopsis thaliana OX=3702 GN=C24_LOCUS16238 PE=4 SV=1	73920	Oxidation (M)	99.2	249.29	19	18	17	16	16	16	12	19	14	17	16	19	10	10	18	15	15	23	12	12	21	17	19	18	20
1514.3	1164.3	2413.1	2428.8	1794.1	923.7	2059.1	1446.3	2892.1	2217.4	2831.3	F4J9G2	Rhodanese/Cell cycle control phosphatase superfamily protein OS=Arabidopsis thaliana OX=3702 GN=At3g59780 PE=1 SV=1	73935	Oxidation (M)	99.2	249.29	19	18	17	16	16	16	12	19	14	17	16	19	10	10	18	15	15	23	12	12	21	17	19	18	20
1514.3	1164.3	2413.1	2428.8	1794.1	923.7	2059.1	1446.3	2892.1	2217.4	2831.3	A0A178VA61	Rhodanese domain-containing protein OS=Arabidopsis thaliana OX=3702 GN=AXX17_At3g54180 PE=4 SV=1	60584	Oxidation (M)	99.2	249.29	24	22	21	19	20	19	14	24	17	21	20	24	10	10	18	15	15	23	12	12	21	17	19	18	20
4430.7	3545.4	4003.1	4906.8	3627.4	2352	5208.4	3278.7	5766.2	4292.3	4968.9	A0A178WRI5	RPL4 OS=Arabidopsis thaliana OX=3702 GN=AXX17_At1g06940 PE=3 SV=1	30142	Oxidation (M)	99.1	176.48	20	17	20	17	17	17	19	17	17	17	17	17	8	8	15	25	13	18	15	16	19	19	16	19	14
4430.7	3545.4	4003.1	4906.8	3627.4	2352	5208.4	3278.7	5766.2	4292.3	4968.9	Q2V4Q4	AT1G07320 protein OS=Arabidopsis thaliana OX=3702 GN=RPL4 PE=1 SV=1	30142	Oxidation (M)	99.1	176.48	20	17	20	17	17	17	19	17	17	17	17	17	8	8	15	25	13	18	15	16	19	19	16	19	14
4430.7	3545.4	4003.1	4906.8	3627.4	2352	5208.4	3278.7	5766.2	4292.3	4968.9	Q3EDH2	Ribosomal protein L4 OS=Arabidopsis thaliana OX=3702 GN=RPL4 PE=1 SV=1	30414	Oxidation (M)	99.1	176.48	20	17	20	16	17	17	19	17	17	17	17	17	8	8	15	25	13	18	15	16	19	19	16	19	14
4430.7	3545.4	4003.1	4906.8	3627.4	2352	5208.4	3278.7	5766.2	4292.3	4968.9	O50061	50S ribosomal protein L4 chloroplastic OS=Arabidopsis thaliana OX=3702 GN=RPL4 PE=2 SV=2	30559	Oxidation (M)	99.1	176.48	20	17	20	16	17	17	19	17	17	17	17	17	8	8	15	25	13	18	15	16	19	19	16	19	14
4430.7	3545.4	4003.1	4906.8	3627.4	2352	5208.4	3278.7	5766.2	4292.3	4968.9	Q0WW46	Uncharacterized protein At1g07320 OS=Arabidopsis thaliana OX=3702 GN=At1g07320 PE=2 SV=1	30559	Oxidation (M)	99.1	176.48	20	17	20	16	17	17	19	17	17	17	17	17	8	8	15	25	13	18	15	16	19	19	16	19	14
4430.7	3545.4	4003.1	4906.8	3627.4	2352	5208.4	3278.7	5766.2	4292.3	4968.9	A0A384KN11	RPL4 OS=Arabidopsis thaliana OX=3702 GN=AXX17_At1g06940 PE=3 SV=1	30559	Oxidation (M)	99.1	176.48	20	17	20	16	17	17	19	17	17	17	17	17	8	8	15	25	13	18	15	16	19	19	16	19	14
4430.7	3545.4	4003.1	4906.8	3627.4	2352	5208.4	3278.7	5766.2	4292.3	4968.9	A0A5S9T2G6	(thale cress) hypothetical protein OS=Arabidopsis thaliana OX=3702 GN=AT9943_LOCUS572 PE=3 SV=1	30587	Oxidation (M)	99.1	176.48	20	17	20	16	17	17	19	17	17	17	17	17	8	8	15	25	13	18	15	16	19	19	16	19	14
1307.3	1346.8	1236.3	1852.1	1379.9	1150.5	1357.6	743.7	2620.4	2128	1850.3	A0A7G2EB58	(thale cress) hypothetical protein OS=Arabidopsis thaliana OX=3702 GN=AT9943_LOCUS6310 PE=3 SV=1	222895	Carbamidomethylation; Oxidation (M)	99.2	245.15	6	5	3	2	5	4	2	4	3	5	5	5	10	9	13	12	12	25	10	10	19	12	24	30	21
1307.3	1346.8	1236.3	1852.1	1379.9	1150.5	1357.6	743.7	2620.4	2128	1850.3	A0A178VPV7	HSP90.5 OS=Arabidopsis thaliana OX=3702 GN=AXX17_At2g02980 PE=3 SV=1	88663	Carbamidomethylation; Oxidation (M)	99.2	245.15	15	12	8	6	12	9	6	9	8	14	13	13	10	9	13	12	12	25	10	10	19	12	24	30	21
1307.3	1346.8	1236.3	1852.1	1379.9	1150.5	1357.6	743.7	2620.4	2128	1850.3	Q9SIF2	Heat shock protein 90-5 chloroplastic OS=Arabidopsis thaliana OX=3702 GN=HSP90-5 PE=1 SV=1	88663	Carbamidomethylation; Oxidation (M)	99.2	245.15	15	12	8	6	12	9	6	9	8	14	13	13	10	9	13	12	12	25	10	10	19	12	24	30	21
3078.4	1966.6	2257.4	2364.9	1828.8	503.64	2859.9	2304.9	2918.2	2808.9	2824	A0A178WE81	Glutamate decarboxylase OS=Arabidopsis thaliana OX=3702 GN=AXX17_At1g59620 PE=3 SV=1	56141	Carbamidomethylation; Oxidation (M)	99.2	273.63	24	18	10	13	21	10	10	18	12	22	19	16	13	13	18	9	16	23	11	12	22	15	23	17	22
3078.4	1966.6	2257.4	2364.9	1828.8	503.64	2859.9	2304.9	2918.2	2808.9	2824	Q42472	Glutamate decarboxylase 2 OS=Arabidopsis thaliana OX=3702 GN=GAD2 PE=1 SV=1	56141	Carbamidomethylation; Oxidation (M)	99.2	273.63	24	18	10	13	21	10	10	18	12	22	19	16	13	13	18	9	16	23	11	12	22	15	23	17	22
3469.2	2730.4	1544.5	2771.9	2008.6	2054.9	3711.2	1473.6	2683.9	2352.9	1784.8	A0A7G2F881	(thale cress) hypothetical protein OS=Arabidopsis thaliana OX=3702 GN=AT9943_LOCUS19301 PE=4 SV=1	48563	Carbamidomethylation; Oxidation (M)	99.1	217.2	15	12	13	9	9	9	7	13	7	12	11	11	8	8	21	17	11	21	16	13	27	10	15	17	19
3469.2	2730.4	1544.5	2771.9	2008.6	2054.9	3711.2	1473.6	2683.9	2352.9	1784.8	F4KE21	Biotin carboxyl carrier protein of acetyl-CoA carboxylase OS=Arabidopsis thaliana OX=3702 GN=CAC1 PE=1 SV=1	26928	Carbamidomethylation; Oxidation (M)	99.1	217.2	26	20	23	16	16	16	13	23	13	22	19	19	8	8	21	17	11	21	16	13	27	10	15	17	19
3469.2	2730.4	1544.5	2771.9	2008.6	2054.9	3711.2	1473.6	2683.9	2352.9	1784.8	A0A178ULR4	Biotin carboxyl carrier protein of acetyl-CoA carboxylase OS=Arabidopsis thaliana OX=3702 GN=AXX17_At5g15990 PE=4 SV=1	26928	Carbamidomethylation; Oxidation (M)	99.1	217.2	26	20	23	16	16	16	13	23	13	22	19	19	8	8	21	17	11	21	16	13	27	10	15	17	19
3469.2	2730.4	1544.5	2771.9	2008.6	2054.9	3711.2	1473.6	2683.9	2352.9	1784.8	Q42533	Biotin carboxyl carrier protein of acetyl-CoA carboxylase 1 chloroplastic OS=Arabidopsis thaliana OX=3702 GN=BCCP1 PE=1 SV=2	29613	Carbamidomethylation; Oxidation (M)	99.1	217.2	24	19	21	15	15	15	11	21	11	20	17	17	8	8	21	17	11	21	16	13	27	10	15	17	19
3469.2	2730.4	1544.5	2771.9	2008.6	2054.9	3711.2	1473.6	2683.9	2352.9	1784.8	A0A178ULU5	Biotin carboxyl carrier protein of acetyl-CoA carboxylase OS=Arabidopsis thaliana OX=3702 GN=AXX17_At5g15990 PE=4 SV=1	29613	Carbamidomethylation; Oxidation (M)	99.1	217.2	24	19	21	15	15	15	11	21	11	20	17	17	8	8	21	17	11	21	16	13	27	10	15	17	19
3523.3	1717.7	2020.3	3765.6	1954.2	1894.2	2572.1	2220.9	3559.8	3533.6	2739.6	Q9SR70	Peptidyl-prolyl cis-trans isomerase FKBP16-4 chloroplastic OS=Arabidopsis thaliana OX=3702 GN=FKBP16-4 PE=1 SV=1	24505	Oxidation (M)	99.1	264.47	34	33	20	28	34	28	18	30	30	30	34	34	8	8	21	7	16	24	13	6	19	14	26	18	19
3523.3	1717.7	2020.3	3765.6	1954.2	1894.2	2572.1	2220.9	3559.8	3533.6	2739.6	A0A178V516	peptidylprolyl isomerase OS=Arabidopsis thaliana OX=3702 GN=AXX17_At3g09760 PE=4 SV=1	24505	Oxidation (M)	99.1	264.47	34	33	20	28	34	28	18	30	30	30	34	34	8	8	21	7	16	24	13	6	19	14	26	18	19
2205	1738.2	1860.7	2862.5	1692.6	564.9	3125.8	2562	3439.9	2211.4	3064.6	P56791	50S ribosomal protein L2 chloroplastic OS=Arabidopsis thaliana OX=3702 GN=rpl2-B PE=3 SV=1	29865	Carbamidomethylation	99.1	272.61	27	20	21	27	23	20	12	23	23	23	23	27	7	7	19	13	14	16	12	9	23	15	21	21	19
2205	1738.2	1860.7	2862.5	1692.6	564.9	3125.8	2562	3439.9	2211.4	3064.6	A0A1B1W512	50S ribosomal protein L2 chloroplastic OS=Arabidopsis thaliana OX=3702 GN=rpl2 PE=3 SV=1	29865	Carbamidomethylation	99.1	272.61	27	20	21	27	23	20	12	23	23	23	23	27	7	7	19	13	14	16	12	9	23	15	21	21	19
2205	1738.2	1860.7	2862.5	1692.6	564.9	3125.8	2562	3439.9	2211.4	3064.6	A0A1B1W4Z1	50S ribosomal protein L2 chloroplastic OS=Arabidopsis thaliana OX=3702 GN=rpl2 PE=3 SV=1	29922	Carbamidomethylation	99.1	272.61	27	20	21	27	23	20	12	23	23	23	23	27	7	7	19	13	14	16	12	9	23	15	21	21	19
2527.2	1442.2	2174.1	2362	1296	866.46	1081.9	2150.4	3235.4	2465.3	3485.4	A0A178URC5	S-(hydroxymethyl)glutathione dehydrogenase OS=Arabidopsis thaliana OX=3702 GN=AXX17_At5g42040 PE=3 SV=1	40699	Carbamidomethylation; Oxidation (M); Acetylation (N-term)	99.1	207.67	25	18	18	11	18	18	11	18	18	25	18	18	9	9	15	17	12	15	15	14	18	14	25	19	18
2527.2	1442.2	2174.1	2362	1296	866.46	1081.9	2150.4	3235.4	2465.3	3485.4	Q96533	Alcohol dehydrogenase class-3 OS=Arabidopsis thaliana OX=3702 GN=ADH2 PE=1 SV=2	40699	Carbamidomethylation; Oxidation (M); Acetylation (N-term)	99.1	207.67	25	18	18	11	18	18	11	18	18	25	18	18	9	9	15	17	12	15	15	14	18	14	25	19	18
2180.7	43.815	1413.5	2848.7	997.32	6.6595	1985.1	3044.6	4128.8	2219.8	2296	A0A7G2ENP9	(thale cress) hypothetical protein OS=Arabidopsis thaliana OX=3702 GN=AT9943_LOCUS11847 PE=3 SV=1	30538		99.1	211.27	25	21	16	21	21	16	9	13	21	25	21	21	6	6	24	9	17	16	12	3	17	20	27	18	19
2180.7	43.815	1413.5	2848.7	997.32	6.6595	1985.1	3044.6	4128.8	2219.8	2296	Q9LW57	Plastid-lipid-associated protein 6 chloroplastic OS=Arabidopsis thaliana OX=3702 GN=PAP6 PE=1 SV=1	30455		99.1	211.27	25	21	16	21	21	16	9	13	21	25	21	21	6	6	24	9	17	16	12	3	17	20	27	18	19
2180.7	43.815	1413.5	2848.7	997.32	6.6595	1985.1	3044.6	4128.8	2219.8	2296	A0A178VGH8	FIB4 OS=Arabidopsis thaliana OX=3702 GN=AXX17_At3g25260 PE=3 SV=1	30455		99.1	211.27	25	21	16	21	21	16	9	13	21	25	21	21	6	6	24	9	17	16	12	3	17	20	27	18	19
4211.1	3872.1	4981.9	4671.1	3579.2	2759.6	6349.7	4951.4	5910.1	5267.5	5124.7	A0A178VHF3	60S acidic ribosomal protein P0 OS=Arabidopsis thaliana OX=3702 GN=AXX17_At3g08820 PE=3 SV=1	34133	Oxidation (M)	99.1	239.45	22	19	21	22	19	22	15	22	22	22	22	19	6	6	21	11	17	17	16	8	19	17	19	19	18
4211.1	3872.1	4981.9	4671.1	3579.2	2759.6	6349.7	4951.4	5910.1	5267.5	5124.7	Q42112	60S acidic ribosomal protein P0-2 OS=Arabidopsis thaliana OX=3702 GN=RPP0B PE=1 SV=2	34133	Oxidation (M)	99.1	239.45	22	19	21	22	19	22	15	22	22	22	22	19	6	6	21	11	17	17	16	8	19	17	19	19	18
4617.1	3235.2	4444.4	3185.4	2821.4	1533.8	4265.5	4020.8	4472.9	4723	3150.4	Q9LXC9	Soluble inorganic pyrophosphatase 6 chloroplastic OS=Arabidopsis thaliana OX=3702 GN=PPA6 PE=1 SV=1	33380	Oxidation (M)	99.1	209.65	25	25	11	15	18	11	11	21	21	21	21	15	6	6	21	15	15	16	15	19	18	18	17	17	11
4617.1	3235.2	4444.4	3185.4	2821.4	1533.8	4265.5	4020.8	4472.9	4723	3150.4	A0A178UER1	inorganic diphosphatase OS=Arabidopsis thaliana OX=3702 GN=AXX17_At5g09180 PE=3 SV=1	33380	Oxidation (M)	99.1	209.65	25	25	11	15	18	11	11	21	21	21	21	15	6	6	21	15	15	16	15	19	18	18	17	17	11
4617.1	3235.2	4444.4	3185.4	2821.4	1533.8	4265.5	4020.8	4472.9	4723	3150.4	A0A7G2F9H2	inorganic diphosphatase OS=Arabidopsis thaliana OX=3702 GN=AT9943_LOCUS18729 PE=3 SV=1	31912	Oxidation (M)	99.1	209.65	26	26	12	15	18	12	12	22	22	22	22	15	6	6	21	15	15	16	15	19	18	18	17	17	11
2349.8	1247.7	1516	1896.1	1806.7	1194.4	2508	1718.7	2541.3	2215.9	2807	P93004	Aquaporin PIP2-7 OS=Arabidopsis thaliana OX=3702 GN=PIP2-7 PE=1 SV=2	29743	Oxidation (M)	98.8	214.75	17	11	7	11	11	11	7	11	11	17	11	11	3	2	18	11	14	14	22	12	19	15	22	14	21
2349.8	1247.7	1516	1896.1	1806.7	1194.4	2508	1718.7	2541.3	2215.9	2807	A0A384LEJ8	(thale cress) hypothetical protein OS=Arabidopsis thaliana OX=3702 GN=AXX17_At4g40080 PE=3 SV=1	29743	Oxidation (M)	98.8	214.75	17	11	7	11	11	11	7	11	11	17	11	11	3	2	18	11	14	14	22	12	19	15	22	14	21
2349.8	1247.7	1516	1896.1	1806.7	1194.4	2508	1718.7	2541.3	2215.9	2807	C0SVL5	Uncharacterized protein At4g35100 (Fragment) OS=Arabidopsis thaliana OX=3702 GN=At4g35100 PE=2 SV=1	29743	Oxidation (M)	98.8	214.75	17	11	7	11	11	11	7	11	11	17	11	11	3	2	18	11	14	14	22	12	19	15	22	14	21
4509.4	3424.7	3979.8	4286.4	5026.9	3313.5	4016.5	4256.3	5039.6	4765.2	5173.8	P82281	Thylakoid lumenal 29 kDa protein chloroplastic OS=Arabidopsis thaliana OX=3702 GN=TL29 PE=1 SV=2	37934	Oxidation (M)	99.1	183.21	16	14	9	9	14	11	8	9	12	12	9	12	6	6	21	14	14	20	16	14	12	14	18	17	20
4509.4	3424.7	3979.8	4286.4	5026.9	3313.5	4016.5	4256.3	5039.6	4765.2	5173.8	A0A5S9XSG0	(thale cress) hypothetical protein OS=Arabidopsis thaliana OX=3702 GN=AT9943_LOCUS15082 PE=3 SV=1	37934	Oxidation (M)	99.1	183.21	16	14	9	9	14	11	8	9	12	12	9	12	6	6	21	14	14	20	16	14	12	14	18	17	20
4509.4	3424.7	3979.8	4286.4	5026.9	3313.5	4016.5	4256.3	5039.6	4765.2	5173.8	A0A1P8B8Y3	Ascorbate peroxidase 4 OS=Arabidopsis thaliana OX=3702 GN=TL29 PE=1 SV=1	43476	Oxidation (M)	99.1	183.21	14	12	8	8	12	10	7	8	11	11	8	11	6	6	21	14	14	20	16	14	12	14	18	17	20
4509.4	3424.7	3979.8	4286.4	5026.9	3313.5	4016.5	4256.3	5039.6	4765.2	5173.8	A0A1P8B8W6	Ascorbate peroxidase 4 OS=Arabidopsis thaliana OX=3702 GN=TL29 PE=1 SV=1	31041	Oxidation (M)	99.1	183.21	19	17	12	12	17	14	10	12	15	15	12	15	6	6	21	14	14	20	16	14	12	14	18	17	20
1957.7	1232.8	1568.9	1755.1	1498.1	770.61	1879.8	1517.9	1790.2	1575.5	2256.6	F4I1C1	General regulatory factor 10 OS=Arabidopsis thaliana OX=3702 GN=GRF10 PE=1 SV=1	28568	Oxidation (M)	99.1	270.79	35	27	26	27	31	29	12	28	35	35	28	30	11	7	20	10	14	16	19	5	17	16	21	23	19
1957.7	1232.8	1568.9	1755.1	1498.1	770.61	1879.8	1517.9	1790.2	1575.5	2256.6	A0A178W0Z4	GRF10 OS=Arabidopsis thaliana OX=3702 GN=AXX17_At1g23390 PE=3 SV=1	28915	Oxidation (M)	99.1	270.79	34	27	26	27	30	28	11	28	34	34	28	30	11	7	20	10	14	16	19	5	17	16	21	23	19
1957.7	1232.8	1568.9	1755.1	1498.1	770.61	1879.8	1517.9	1790.2	1575.5	2256.6	A0A654EMV4	14_3_3 domain-containing protein OS=Arabidopsis thaliana OX=3702 GN=AN1_LOCUS2375 PE=3 SV=1	28900	Oxidation (M)	99.1	270.79	34	27	26	27	30	28	11	28	34	34	28	30	11	7	20	10	14	16	19	5	17	16	21	23	19
1957.7	1232.8	1568.9	1755.1	1498.1	770.61	1879.8	1517.9	1790.2	1575.5	2256.6	B9DFR1	AT1G22300 protein OS=Arabidopsis thaliana OX=3702 GN=At1g22300 PE=2 SV=1	28900	Oxidation (M)	99.1	270.79	34	27	26	27	30	28	11	28	34	34	28	30	11	7	20	10	14	16	19	5	17	16	21	23	19
1957.7	1232.8	1568.9	1755.1	1498.1	770.61	1879.8	1517.9	1790.2	1575.5	2256.6	P48347	14-3-3-like protein GF14 epsilon OS=Arabidopsis thaliana OX=3702 GN=GRF10 PE=1 SV=1	28915	Oxidation (M)	99.1	270.79	34	27	26	27	30	28	11	28	34	34	28	30	11	7	20	10	14	16	19	5	17	16	21	23	19
5300	4652.8	5098.8	5495.5	4635.8	3638.3	5262.4	4402.6	5675.1	5570.6	6035	Q9SEU6	Thioredoxin M4 chloroplastic OS=Arabidopsis thaliana OX=3702 GN=At3g15360 PE=2 SV=2	21172		98.7	180.12	16	16	11	11	16	16	16	11	16	16	16	16	4	4	17	18	16	12	15	16	16	13	16	20	21
5300	4652.8	5098.8	5495.5	4635.8	3638.3	5262.4	4402.6	5675.1	5570.6	6035	A0A7G2ELV3	(thale cress) hypothetical protein OS=Arabidopsis thaliana OX=3702 GN=AT9943_LOCUS11114 PE=4 SV=1	21202		98.7	180.12	16	16	11	11	16	16	16	11	16	16	16	16	4	4	17	18	16	12	15	16	16	13	16	20	21
5300	4652.8	5098.8	5495.5	4635.8	3638.3	5262.4	4402.6	5675.1	5570.6	6035	A0A178VJ83	TRX-M4 OS=Arabidopsis thaliana OX=3702 GN=AXX17_At3g16090 PE=4 SV=1	21172		98.7	180.12	16	16	11	11	16	16	16	11	16	16	16	16	4	4	17	18	16	12	15	16	16	13	16	20	21
6802.7	1903.2	3652.8	3453.2	2452	1045.8	3582.8	4569.2	4163.8	6777.4	3332.2	A0A5S9XP40	Epimerase domain-containing protein OS=Arabidopsis thaliana OX=3702 GN=C24_LOCUS16576 PE=4 SV=1	43857	Carbamidomethylation; Oxidation (M)	99.2	270.11	29	13	13	8	20	11	11	13	11	20	15	20	11	11	15	11	10	23	13	12	15	17	21	21	21
6802.7	1903.2	3652.8	3453.2	2452	1045.8	3582.8	4569.2	4163.8	6777.4	3332.2	A0A654FKA7	Epimerase domain-containing protein OS=Arabidopsis thaliana OX=3702 GN=AN1_LOCUS16705 PE=4 SV=1	43843	Carbamidomethylation; Oxidation (M)	99.2	270.11	29	13	13	8	20	11	11	13	11	20	15	20	11	11	15	11	10	23	13	12	15	17	21	21	21
6802.7	1903.2	3652.8	3453.2	2452	1045.8	3582.8	4569.2	4163.8	6777.4	3332.2	Q9LYA9	Chloroplast stem-loop binding protein of 41 kDa a chloroplastic OS=Arabidopsis thaliana OX=3702 GN=CSP41A PE=1 SV=1	43930	Carbamidomethylation; Oxidation (M)	99.2	270.11	29	13	13	8	20	11	11	13	11	20	15	20	11	11	15	11	10	23	13	12	15	17	21	21	21
6802.7	1903.2	3652.8	3453.2	2452	1045.8	3582.8	4569.2	4163.8	6777.4	3332.2	A0A178VDH1	CSP41A OS=Arabidopsis thaliana OX=3702 GN=AXX17_At3g57420 PE=4 SV=1	44017	Carbamidomethylation; Oxidation (M)	99.2	270.11	29	13	13	8	20	11	11	13	11	20	15	20	11	11	15	11	10	23	13	12	15	17	21	21	21
	0	528.95	406.41		166.04	419.66		560.97	500.6	713.18	A0A178W662	GRF4 OS=Arabidopsis thaliana OX=3702 GN=AXX17_At1g35830 PE=3 SV=1	30194	Oxidation (M)	99.2	244.4	36	15	16	22	26	14	18	22	22	27	25	32	11	3	12	7	15	16	12	9	17	16	23	21	30
	0	528.95	406.41		166.04	419.66		560.97	500.6	713.18	P46077	14-3-3-like protein GF14 phi OS=Arabidopsis thaliana OX=3702 GN=GRF4 PE=1 SV=2	30194	Oxidation (M)	99.2	244.4	36	15	16	22	26	14	18	22	22	27	25	32	11	3	12	7	15	16	12	9	17	16	23	21	30
	0	528.95	406.41		166.04	419.66		560.97	500.6	713.18	A0A7G2DZF3	(thale cress) hypothetical protein OS=Arabidopsis thaliana OX=3702 GN=AT9943_LOCUS2942 PE=3 SV=1	30980	Oxidation (M)	99.2	244.4	35	15	16	22	25	14	18	22	21	26	25	31	11	3	12	7	15	16	12	9	17	16	23	21	30
	0	528.95	406.41		166.04	419.66		560.97	500.6	713.18	F4HWQ5	GF14 protein phi chain OS=Arabidopsis thaliana OX=3702 GN=GF14 PHI PE=1 SV=1	33357	Oxidation (M)	99.2	244.4	32	14	15	20	23	13	17	20	20	24	23	29	11	3	12	7	15	16	12	9	17	16	23	21	30
	0	528.95	406.41		166.04	419.66		560.97	500.6	713.18	Q94BW0	At1g35160/T32G9_30 OS=Arabidopsis thaliana OX=3702 GN=At1g35160 PE=2 SV=1	30179	Oxidation (M)	99.2	244.4	36	15	16	22	26	14	18	22	22	27	25	32	11	3	12	7	15	16	12	9	17	16	23	21	30
1354.5	1341.4	1995.1	1287	750.23	70.28	1574.4	840.11	1074.3	1137.8	971.38	A0A5S9WT29	Carbonic anhydrase OS=Arabidopsis thaliana OX=3702 GN=C24_LOCUS5965 PE=3 SV=1	30836	Oxidation (M)	99.1	173.76	18	18	11	11	18	11	11	11	11	18	11	11	5	5	14	17	14	25	10	9	20	17	22	12	17
1354.5	1341.4	1995.1	1287	750.23	70.28	1574.4	840.11	1074.3	1137.8	971.38	Q94CE4	Beta carbonic anhydrase 4 OS=Arabidopsis thaliana OX=3702 GN=BCA4 PE=1 SV=1	30836	Oxidation (M)	99.1	173.76	18	18	11	11	18	11	11	11	11	18	11	11	5	5	14	17	14	25	10	9	20	17	22	12	17
4101.5	2939.3	3700.2	4619	3297.2	1981.1	4918.6	3995	4860.4	3806.1	3897	P39207	Nucleoside diphosphate kinase 1 OS=Arabidopsis thaliana OX=3702 GN=NDK1 PE=1 SV=1	16500	Oxidation (M); Acetylation (N-term)	99	253.57	42	30	30	30	42	30	21	30	42	36	30	42	6	6	16	6	14	20	14	9	19	18	22	16	23
4101.5	2939.3	3700.2	4619	3297.2	1981.1	4918.6	3995	4860.4	3806.1	3897	A0A178UXQ6	Nucleoside diphosphate kinase OS=Arabidopsis thaliana OX=3702 GN=AXX17_At4g10580 PE=3 SV=1	16500	Oxidation (M); Acetylation (N-term)	99	253.57	42	30	30	30	42	30	21	30	42	36	30	42	6	6	16	6	14	20	14	9	19	18	22	16	23
3234.2	2342.5	3028.8	2934.4	1948.4	1860.6	2946.4	2140.8	3213.1	2913.2	3004	A0A7G2F3G0	(thale cress) hypothetical protein OS=Arabidopsis thaliana OX=3702 GN=AT9943_LOCUS17567 PE=3 SV=1	82657	Carbamidomethylation; Oxidation (M)	99.2	221.08	12	8	7	7	6	5	6	7	7	7	7	7	8	8	15	14	17	19	13	13	13	13	17	25	17
3246.1	2535.9	2844.9	3189.1	2322.2	1660.3	3391.5	2445.9	3423.7	2485.7	2783.5	A0A178V3C5	CHLM OS=Arabidopsis thaliana OX=3702 GN=AXX17_At4g28980 PE=4 SV=1	33796	Oxidation (M)	99.2	284.31	39	25	19	22	26	25	15	29	38	35	24	29	12	12	21	11	17	18	16	8	14	15	25	12	19
3246.1	2535.9	2844.9	3189.1	2322.2	1660.3	3391.5	2445.9	3423.7	2485.7	2783.5	Q9SW18	Magnesium protoporphyrin IX methyltransferase chloroplastic OS=Arabidopsis thaliana OX=3702 GN=CHLM PE=1 SV=1	33796	Oxidation (M)	99.2	284.31	39	25	19	22	26	25	15	29	38	35	24	29	12	12	21	11	17	18	16	8	14	15	25	12	19
3246.1	2535.9	2844.9	3189.1	2322.2	1660.3	3391.5	2445.9	3423.7	2485.7	2783.5	A0A1P8B4G1	Magnesium-protoporphyrin IX methyltransferase OS=Arabidopsis thaliana OX=3702 GN=CHLM PE=1 SV=1	35592	Oxidation (M)	99.2	284.31	37	24	18	21	25	24	15	27	37	34	23	28	12	12	21	11	17	18	16	8	14	15	25	12	19
6007.6	3048.4	5520.6	3075.5	4592.6	3464	5269.6	3197.1	6354.6	5595.9	3735.7	A0A7G2F850	valine--tRNA ligase OS=Arabidopsis thaliana OX=3702 GN=AT9943_LOCUS19329 PE=3 SV=1	278374	Carbamidomethylation; Oxidation (M)	99.2	251.9	6	3	3	2	3	4	2	3	3	4	3	4	15	15	17	15	11	20	17	10	24	12	17	17	15
3910.5	4828.6	4300.1	3687.9	3884.7	3077.6	6165	3544.5	3700.5	3917	4724.1	A0A178W8C5	Uncharacterized protein OS=Arabidopsis thaliana OX=3702 GN=AXX17_At1g09210 PE=1 SV=1	19947	Carbamidomethylation; Oxidation (M)	99.2	242.34	47	27	22	23	27	22	18	47	31	31	27	27	9	9	15	10	15	24	19	7	24	15	17	17	12
3910.5	4828.6	4300.1	3687.9	3884.7	3077.6	6165	3544.5	3700.5	3917	4724.1	Q9ZPZ4	T31J12.3 protein OS=Arabidopsis thaliana OX=3702 GN=At1g09310 PE=1 SV=1	19947	Carbamidomethylation; Oxidation (M)	99.2	242.34	47	27	22	23	27	22	18	47	31	31	27	27	9	9	15	10	15	24	19	7	24	15	17	17	12
3910.5	4828.6	4300.1	3687.9	3884.7	3077.6	6165	3544.5	3700.5	3917	4724.1	A0A5S9TFP6	(thale cress) hypothetical protein OS=Arabidopsis thaliana OX=3702 GN=At1g09310 PE=4 SV=1	20076	Carbamidomethylation; Oxidation (M)	99.2	242.34	47	27	22	23	27	22	18	47	31	31	27	27	9	9	15	10	15	24	19	7	24	15	17	17	12
1657.7	969.08	1201.6	2168.5	891.77	478.91	2057.3	1583.9	1692	1634.9	2287.7	Q9MA79	Fructose-1 6-bisphosphatase cytosolic OS=Arabidopsis thaliana OX=3702 GN=CYFBP PE=1 SV=1	37287	Oxidation (M)	99.1	286.16	26	24	15	17	23	17	12	23	21	26	21	23	9	9	16	12	10	17	8	11	22	21	21	17	20
1657.7	969.08	1201.6	2168.5	891.77	478.91	2057.3	1583.9	1692	1634.9	2287.7	A0A178WCE5	fructose-bisphosphatase OS=Arabidopsis thaliana OX=3702 GN=AXX17_At1g39530 PE=3 SV=1	37287	Oxidation (M)	99.1	286.16	26	24	15	17	23	17	12	23	21	26	21	23	9	9	16	12	10	17	8	11	22	21	21	17	20
1657.7	969.08	1201.6	2168.5	891.77	478.91	2057.3	1583.9	1692	1634.9	2287.7	A0A7G2DYE2	fructose-bisphosphatase OS=Arabidopsis thaliana OX=3702 GN=AT9943_LOCUS3131 PE=3 SV=1	41351	Oxidation (M)	99.1	286.16	24	22	13	16	21	16	11	21	19	24	20	21	9	9	16	12	10	17	8	11	22	21	21	17	20
1119.6	2251.9	2887.1	2096.1	3225.2	484.86	2855.3	1266.5	3540.8	1887.8	4459	A0A5S9X7V2	glutathione transferase OS=Arabidopsis thaliana OX=3702 GN=AN1_LOCUS11303 PE=3 SV=1	29144	Carbamidomethylation; Oxidation (M)	99.1	244.7	29	16	16	20	27	20	13	16	19	29	21	29	8	7	15	10	10	19	16	12	16	12	31	16	17
1119.6	2251.9	2887.1	2096.1	3225.2	484.86	2855.3	1266.5	3540.8	1887.8	4459	Q96266	Glutathione S-transferase F8 chloroplastic OS=Arabidopsis thaliana OX=3702 GN=GSTF8 PE=1 SV=3	29232	Carbamidomethylation; Oxidation (M)	99.1	244.7	29	16	16	20	27	20	13	16	19	29	21	29	8	7	15	10	10	19	16	12	16	12	31	16	17
1119.6	2251.9	2887.1	2096.1	3225.2	484.86	2855.3	1266.5	3540.8	1887.8	4459	A0A178VZN0	glutathione transferase OS=Arabidopsis thaliana OX=3702 GN=AXX17_At2g45510 PE=3 SV=1	29319	Carbamidomethylation; Oxidation (M)	99.1	244.7	29	16	16	20	27	20	13	16	19	29	20	29	8	7	15	10	10	19	16	12	16	12	31	16	17
1119.6	2251.9	2887.1	2096.1	3225.2	484.86	2855.3	1266.5	3540.8	1887.8	4459	A0A7G2EI44	glutathione transferase OS=Arabidopsis thaliana OX=3702 GN=AT9943_LOCUS9725 PE=3 SV=1	24077	Carbamidomethylation; Oxidation (M)	99.1	244.7	36	20	19	25	33	25	16	19	23	36	25	36	8	7	15	10	10	19	16	12	16	12	31	16	17
8042.4	6951.7	7553	7771.8	6898.3	4849.1	5165.6	7498.7	8288.7	8627.8	8746.6	P61841	30S ribosomal protein S7 chloroplastic OS=Arabidopsis thaliana OX=3702 GN=rps7-B PE=1 SV=1	17357	Oxidation (M)	99.1	209.16	35	35	35	35	35	35	30	35	35	35	35	30	5	5	17	15	16	15	17	13	17	12	20	17	15
8042.4	6951.7	7553	7771.8	6898.3	4849.1	5165.6	7498.7	8288.7	8627.8	8746.6	Q6KGZ1	30S ribosomal protein S7 chloroplastic OS=Arabidopsis thaliana OX=3702 GN=rps7 PE=3 SV=1	17357	Oxidation (M)	99.1	209.16	35	35	35	35	35	35	30	35	35	35	35	30	5	5	17	15	16	15	17	13	17	12	20	17	15
1441.2	723.48	732.57	1500.2	649.39	518.76	1494.3	697.64	1460.5	907.05	1943.2	Q9C8P0	Dihydrolipoyllysine-residue acetyltransferase component 5 of pyruvate dehydrogenase complex chloroplastic OS=Arabidopsis thaliana OX=3702 GN=EMB3003 PE=2 SV=1	48307	Oxidation (M)	99.2	284.3	22	15	20	16	18	18	19	17	16	20	20	20	9	7	16	21	10	17	16	11	17	14	17	19	16
1441.2	723.48	732.57	1500.2	649.39	518.76	1494.3	697.64	1460.5	907.05	1943.2	A0A178W4F9	Dihydrolipoamide acetyltransferase component of pyruvate dehydrogenase complex OS=Arabidopsis thaliana OX=3702 GN=AXX17_At1g35370 PE=3 SV=1	48307	Oxidation (M)	99.2	284.3	22	15	20	16	18	18	19	17	16	20	20	20	9	7	16	21	10	17	16	11	17	14	17	19	16
1441.2	723.48	732.57	1500.2	649.39	518.76	1494.3	697.64	1460.5	907.05	1943.2	A0A7G2DV84	Dihydrolipoamide acetyltransferase component of pyruvate dehydrogenase complex OS=Arabidopsis thaliana OX=3702 GN=AT9943_LOCUS2908 PE=3 SV=1	45597	Oxidation (M)	99.2	284.3	23	16	21	17	19	19	20	18	17	21	21	21	9	7	16	21	10	17	16	11	17	14	17	19	16
3720.8	4504.5	4852.4	5447.6	4341.1	3785.6	5303.1	2750.4	6262.9	5394.1	5644	A0A178VQE6	(thale cress) hypothetical protein OS=Arabidopsis thaliana OX=3702 GN=AXX17_At2g25000 PE=4 SV=1	15482	Oxidation (M)	99	230.85	39	39	32	39	39	38	26	39	33	39	39	39	6	6	18	9	16	21	13	12	18	13	22	13	19
3720.8	4504.5	4852.4	5447.6	4341.1	3785.6	5303.1	2750.4	6262.9	5394.1	5644	Q9ZV24	Outer envelope pore protein 16-1 chloroplastic OS=Arabidopsis thaliana OX=3702 GN=OEP161 PE=1 SV=1	15482	Oxidation (M)	99	230.85	39	39	32	39	39	38	26	39	33	39	39	39	6	6	18	9	16	21	13	12	18	13	22	13	19
430.62	132.45	567.5	701.05	360.99	0	606.11	380.54	1208.5	1094.9	1124.8	A0A5S9Y5J6	Protein TIC 40 chloroplastic-like OS=Arabidopsis thaliana OX=3702 GN=C24_LOCUS22330 PE=4 SV=1	48260	Carbamidomethylation; Oxidation (M)	99.2	258.49	26	19	12	15	26	19	5	26	19	26	26	26	8	8	18	4	6	22	12	4	27	11	28	21	20
430.62	132.45	567.5	701.05	360.99	0	606.11	380.54	1208.5	1094.9	1124.8	A0A654G1K9	Protein TIC 40 chloroplastic-like OS=Arabidopsis thaliana OX=3702 GN=AN1_LOCUS22440 PE=4 SV=1	48275	Carbamidomethylation; Oxidation (M)	99.2	258.49	26	19	12	15	26	19	5	26	19	26	26	26	8	8	18	4	6	22	12	4	27	11	28	21	20
430.62	132.45	567.5	701.05	360.99	0	606.11	380.54	1208.5	1094.9	1124.8	Q9FMD5	Protein TIC 40 chloroplastic OS=Arabidopsis thaliana OX=3702 GN=TIC40 PE=1 SV=1	48903	Carbamidomethylation; Oxidation (M)	99.2	258.49	26	19	12	15	26	19	5	26	19	26	26	26	8	8	18	4	6	22	12	4	27	11	28	21	20
430.62	132.45	567.5	701.05	360.99	0	606.11	380.54	1208.5	1094.9	1124.8	A0A178UEV6	TIC40 OS=Arabidopsis thaliana OX=3702 GN=AXX17_At5g16250 PE=4 SV=1	48903	Carbamidomethylation; Oxidation (M)	99.2	258.49	26	19	12	15	26	19	5	26	19	26	26	26	8	8	18	4	6	22	12	4	27	11	28	21	20
7267.8	6582.3	6494.8	7684.8	6924	5367	8777.4	6791.4	8749	7807.5	8502.7	A0A178UHR1	Germin-like protein OS=Arabidopsis thaliana OX=3702 GN=AXX17_At5g20590 PE=3 SV=1	21863	Carbamidomethylation	98.7	198.61	20	20	9	20	20	20	20	20	20	20	20	20	3	3	21	7	10	15	11	12	21	22	22	19	12
7267.8	6582.3	6494.8	7684.8	6924	5367	8777.4	6791.4	8749	7807.5	8502.7	P94072	Germin-like protein subfamily 3 member 3 OS=Arabidopsis thaliana OX=3702 GN=GER3 PE=1 SV=1	21836	Carbamidomethylation	98.4	198.61	20	20	9	20	20	20	20	20	20	20	20	20	3	3	21	7	10	15	11	12	21	22	22	19	12
7267.8	6582.3	6494.8	7684.8	6924	5367	8777.4	6791.4	8749	7807.5	8502.7	A0A5S9Y5Y3	Germin-like protein OS=Arabidopsis thaliana OX=3702 GN=AN1_LOCUS22861 PE=3 SV=1	21836	Carbamidomethylation	98.4	198.61	20	20	9	20	20	20	20	20	20	20	20	20	3	3	21	7	10	15	11	12	21	22	22	19	12
4099.3	6790.1	7478.3	7670.1	6825.6	5047.1	7827.9	6621.5	8810.3	6597.2	7412.7	O23049	50S ribosomal protein L6 chloroplastic OS=Arabidopsis thaliana OX=3702 GN=RPL6 PE=2 SV=1	24706	Oxidation (M)	99.2	230.33	44	26	21	21	21	21	16	26	37	40	17	24	9	9	15	17	16	15	12	15	13	15	22	19	12
4099.3	6790.1	7478.3	7670.1	6825.6	5047.1	7827.9	6621.5	8810.3	6597.2	7412.7	A0A178W979	(thale cress) hypothetical protein OS=Arabidopsis thaliana OX=3702 GN=AXX17_At1g04580 PE=3 SV=1	24706	Oxidation (M)	99.2	230.33	44	26	21	21	21	21	16	26	37	40	17	24	9	9	15	17	16	15	12	15	13	15	22	19	12
4099.3	6790.1	7478.3	7670.1	6825.6	5047.1	7827.9	6621.5	8810.3	6597.2	7412.7	B9DI38	AT1G05190 protein (Fragment) OS=Arabidopsis thaliana OX=3702 GN=At1g05190 PE=2 SV=1	22205	Oxidation (M)	99.2	230.33	49	29	23	23	23	23	18	29	42	45	20	27	9	9	15	17	16	15	12	15	13	15	22	19	12
4524	1290.6	2108.5	1598.3	1408.7	406.1	1544.3	2146.3	2654.5	2002.7	1483.5	Q9S7E4	Formate dehydrogenase chloroplastic/mitochondrial OS=Arabidopsis thaliana OX=3702 GN=FDH1 PE=1 SV=1	42410	Oxidation (M)	99.1	216.4	22	17	17	17	15	17	11	14	14	20	20	20	8	8	18	12	17	10	19	5	14	17	24	20	15
4524	1290.6	2108.5	1598.3	1408.7	406.1	1544.3	2146.3	2654.5	2002.7	1483.5	A0A178UHK7	Formate dehydrogenase mitochondrial OS=Arabidopsis thaliana OX=3702 GN=AXX17_At5g14280 PE=3 SV=1	42410	Oxidation (M)	99.1	216.4	22	17	17	17	15	17	11	14	14	20	20	20	8	8	18	12	17	10	19	5	14	17	24	20	15
4524	1290.6	2108.5	1598.3	1408.7	406.1	1544.3	2146.3	2654.5	2002.7	1483.5	C0Z349	AT5G14780 protein OS=Arabidopsis thaliana OX=3702 GN=At5g14780 PE=2 SV=1	25115	Oxidation (M)	99.1	216.4	39	29	29	29	26	29	19	24	24	34	35	34	8	8	18	12	17	10	19	5	14	17	24	20	15
4524	1290.6	2108.5	1598.3	1408.7	406.1	1544.3	2146.3	2654.5	2002.7	1483.5	A0A1P8B9N1	Formate dehydrogenase mitochondrial OS=Arabidopsis thaliana OX=3702 GN=FDH PE=1 SV=1	39630	Oxidation (M)	99.1	216.4	24	18	18	18	16	18	12	15	15	21	22	21	8	8	18	12	17	10	19	5	14	17	24	20	15
4524	1290.6	2108.5	1598.3	1408.7	406.1	1544.3	2146.3	2654.5	2002.7	1483.5	A0A1P8B9L1	Formate dehydrogenase mitochondrial OS=Arabidopsis thaliana OX=3702 GN=FDH PE=1 SV=1	41038	Oxidation (M)	99.1	216.4	23	18	18	18	15	18	12	15	15	20	21	20	8	8	18	12	17	10	19	5	14	17	24	20	15
1608.1	903.46	911.3	1361.8	1755	324.56	1361.3	956.04	1631	1522.1	1496.9	A0A090MHY5	Glucose-6-phosphate isomerase OS=Arabidopsis thaliana OX=3702 GN=PGI1 (At4g24620) PE=2 SV=1	66807	Carbamidomethylation; Oxidation (M)	99.2	254.99	17	14	12	14	16	15	12	14	16	16	16	16	9	9	16	10	14	17	11	10	13	19	25	19	17
1608.1	903.46	911.3	1361.8	1755	324.56	1361.3	956.04	1631	1522.1	1496.9	A0A178UUU3	Glucose-6-phosphate isomerase OS=Arabidopsis thaliana OX=3702 GN=AXX17_At4g28500 PE=3 SV=1	67048	Carbamidomethylation; Oxidation (M)	99.2	254.99	17	14	12	14	15	15	12	14	15	15	15	15	9	9	16	10	14	17	11	10	13	19	25	19	17
1608.1	903.46	911.3	1361.8	1755	324.56	1361.3	956.04	1631	1522.1	1496.9	Q8H103	Glucose-6-phosphate isomerase 1 chloroplastic OS=Arabidopsis thaliana OX=3702 GN=PGI1 PE=1 SV=1	67048	Carbamidomethylation; Oxidation (M)	99.2	254.99	17	14	12	14	15	15	12	14	15	15	15	15	9	9	16	10	14	17	11	10	13	19	25	19	17
6352.7	5542.5	5122.7	5351.3	6309.9	4360.4	5621.7	4868.3	5878.4	6057.5	6255.8	A0A178VTH6	MOD1 OS=Arabidopsis thaliana OX=3702 GN=AXX17_At2g05030 PE=3 SV=1	41191	Carbamidomethylation; Oxidation (M)	99.2	210.17	21	14	14	14	14	16	12	12	14	18	16	14	8	8	21	15	14	14	19	14	13	12	19	12	17
6352.7	5542.5	5122.7	5351.3	6309.9	4360.4	5621.7	4868.3	5878.4	6057.5	6255.8	Q9SLA8	Enoyl-[acyl-carrier-protein] reductase [NADH] chloroplastic OS=Arabidopsis thaliana OX=3702 GN=MOD1 PE=1 SV=1	41214	Carbamidomethylation; Oxidation (M)	99.2	210.17	21	14	14	14	14	16	12	12	14	18	16	14	8	8	21	15	14	14	19	14	13	12	19	12	17
6352.7	5542.5	5122.7	5351.3	6309.9	4360.4	5621.7	4868.3	5878.4	6057.5	6255.8	A0A654ETR6	(thale cress) hypothetical protein OS=Arabidopsis thaliana OX=3702 GN=AN1_LOCUS7603 PE=3 SV=1	41214	Carbamidomethylation; Oxidation (M)	99.2	210.17	21	14	14	14	14	16	12	12	14	18	16	14	8	8	21	15	14	14	19	14	13	12	19	12	17
1579.2	1198.1	1156.1	1125.3	1637.4	870.64	1815.2	1246.6	1518.7	1626.2	1794.1	A0A7G2DYJ2	Protein disulfide-isomerase OS=Arabidopsis thaliana OX=3702 GN=AT9943_LOCUS1895 PE=3 SV=1	145483	Oxidation (M)	99.2	278.93	9	7	7	7	7	8	5	6	8	7	7	6	12	7	14	18	16	16	14	14	19	14	16	15	13
1579.2	1198.1	1156.1	1125.3	1637.4	870.64	1815.2	1246.6	1518.7	1626.2	1794.1	A0A5S9VFG3	Protein disulfide-isomerase OS=Arabidopsis thaliana OX=3702 GN=C24_LOCUS2227 PE=3 SV=1	55630	Oxidation (M)	99.2	278.93	24	18	19	19	19	21	13	16	22	19	19	17	12	7	14	18	16	16	14	14	19	14	16	15	13
1579.2	1198.1	1156.1	1125.3	1637.4	870.64	1815.2	1246.6	1518.7	1626.2	1794.1	Q9XI01	Protein disulfide isomerase-like 1-1 OS=Arabidopsis thaliana OX=3702 GN=PDIL1-1 PE=1 SV=1	55602	Oxidation (M)	99.2	278.93	24	18	19	19	19	21	13	16	22	19	19	17	12	7	14	18	16	16	14	14	19	14	16	15	13
1579.2	1198.1	1156.1	1125.3	1637.4	870.64	1815.2	1246.6	1518.7	1626.2	1794.1	A0A178WAM1	Protein disulfide-isomerase OS=Arabidopsis thaliana OX=3702 GN=AXX17_At1g22850 PE=3 SV=1	55602	Oxidation (M)	99.2	278.93	24	18	19	19	19	21	13	16	22	19	19	17	12	7	14	18	16	16	14	14	19	14	16	15	13
1579.2	1198.1	1156.1	1125.3	1637.4	870.64	1815.2	1246.6	1518.7	1626.2	1794.1	A0A178W8M5	Protein disulfide-isomerase OS=Arabidopsis thaliana OX=3702 GN=AXX17_At1g22850 PE=3 SV=1	57146	Oxidation (M)	99.2	278.93	24	18	18	18	18	20	12	15	21	19	19	16	12	7	14	18	16	16	14	14	19	14	16	15	13
3203.8	1903.7	1941.2	2738.9	2127.6	1431.7	2649.6	2641.8	3088.2	2373	2859.3	A0A5S9Y3A2	Uncharacterized protein OS=Arabidopsis thaliana OX=3702 GN=C24_LOCUS21827 PE=4 SV=1	38765	Oxidation (M)	99.1	202.99	18	16	18	16	16	18	13	16	18	18	18	18	8	3	16	17	17	13	16	14	13	14	17	19	13
3203.8	1903.7	1941.2	2738.9	2127.6	1431.7	2649.6	2641.8	3088.2	2373	2859.3	A0A178UK33	(thale cress) hypothetical protein OS=Arabidopsis thaliana OX=3702 GN=AXX17_At5g11140 PE=1 SV=1	39641	Oxidation (M)	99.1	202.99	18	15	17	15	15	18	13	15	18	18	18	18	8	3	16	17	17	13	16	14	13	14	17	19	13
3203.8	1903.7	1941.2	2738.9	2127.6	1431.7	2649.6	2641.8	3088.2	2373	2859.3	Q9LYE7	Uncharacterized protein At5g11420 OS=Arabidopsis thaliana OX=3702 GN=At5g11420 PE=1 SV=1	39641	Oxidation (M)	99.1	202.99	18	15	17	15	15	18	13	15	18	18	18	18	8	3	16	17	17	13	16	14	13	14	17	19	13
1741.7	1873.5	1662.8	2354.9	1932.1	1310.3	3082.3	1933.5	2952.5	2348.8	2634.8	A0A384KUF3	Ribosomal protein L15 OS=Arabidopsis thaliana OX=3702 GN=AXX17_At4g20440 PE=3 SV=1	24239		99.1	198.22	25	22	22	22	22	18	25	22	22	25	25	25	5	5	13	11	13	17	12	8	19	14	20	16	25
1741.7	1873.5	1662.8	2354.9	1932.1	1310.3	3082.3	1933.5	2952.5	2348.8	2634.8	Q8VYF1	60S ribosomal protein L15-2 OS=Arabidopsis thaliana OX=3702 GN=RPL15B PE=2 SV=1	24239		99.1	198.22	25	22	22	22	22	18	25	22	22	25	25	25	5	5	13	11	13	17	12	8	19	14	20	16	25
1741.7	1873.5	1662.8	2354.9	1932.1	1310.3	3082.3	1933.5	2952.5	2348.8	2634.8	Q0WWU9	Ribosomal protein L15 OS=Arabidopsis thaliana OX=3702 GN=At4g17390 PE=2 SV=1	24239		99.1	198.22	25	22	22	22	22	18	25	22	22	25	25	25	5	5	13	11	13	17	12	8	19	14	20	16	25
1741.7	1873.5	1662.8	2354.9	1932.1	1310.3	3082.3	1933.5	2952.5	2348.8	2634.8	A0A178V5T1	Ribosomal protein L15 OS=Arabidopsis thaliana OX=3702 GN=AXX17_At4g19680 PE=3 SV=1	24239		99.1	198.22	25	22	22	22	22	18	25	22	22	25	25	25	5	5	13	11	13	17	12	8	19	14	20	16	25
1741.7	1873.5	1662.8	2354.9	1932.1	1310.3	3082.3	1933.5	2952.5	2348.8	2634.8	O23515	60S ribosomal protein L15-1 OS=Arabidopsis thaliana OX=3702 GN=RPL15A PE=2 SV=1	24239		99.1	198.22	25	22	22	22	22	18	25	22	22	25	25	25	5	5	13	11	13	17	12	8	19	14	20	16	25
519.24	253.44	433.78	216.75	279.82	183.41	287.33	557.59	477.33	502.78	499.78	A0A7G2EG38	ATP citrate synthase OS=Arabidopsis thaliana OX=3702 GN=AT9943_LOCUS10307 PE=4 SV=1	69402	Carbamidomethylation; Oxidation (M); Acetylation (N-term)	99.2	299.26	22	17	12	12	18	12	8	14	19	19	17	18	12	3	18	10	13	15	9	8	20	20	17	14	24
519.24	253.44	433.78	216.75	279.82	183.41	287.33	557.59	477.33	502.78	499.78	A0A178V742	ATP citrate synthase OS=Arabidopsis thaliana OX=3702 GN=AXX17_At3g06470 PE=4 SV=1	65814	Carbamidomethylation; Oxidation (M); Acetylation (N-term)	99.2	299.26	24	17	12	12	19	12	9	14	20	20	18	19	12	3	18	10	13	15	9	8	20	20	17	14	24
519.24	253.44	433.78	216.75	279.82	183.41	287.33	557.59	477.33	502.78	499.78	Q9C522	ATP-citrate synthase beta chain protein 1 OS=Arabidopsis thaliana OX=3702 GN=ACLB-1 PE=2 SV=1	65814	Carbamidomethylation; Oxidation (M); Acetylation (N-term)	99.2	299.26	24	17	12	12	19	12	9	14	20	20	18	19	12	3	18	10	13	15	9	8	20	20	17	14	24
5034.6	3663	5253	4418.3	3461.8	2252.9	5784.8	4773.4	6257.8	4813.9	5715.9	Q9MAP3	50S ribosomal protein L11 chloroplastic OS=Arabidopsis thaliana OX=3702 GN=RPL11 PE=2 SV=1	23148	Carbamidomethylation; Oxidation (M)	99.1	243.93	37	34	17	25	34	17	20	29	34	37	34	29	7	7	22	8	9	15	9	7	18	13	29	23	15
5034.6	3663	5253	4418.3	3461.8	2252.9	5784.8	4773.4	6257.8	4813.9	5715.9	A0A178WDS8	(thale cress) hypothetical protein OS=Arabidopsis thaliana OX=3702 GN=AXX17_At1g33710 PE=3 SV=1	23148	Carbamidomethylation; Oxidation (M)	99.1	243.93	37	34	17	25	34	17	20	29	34	37	34	29	7	7	22	8	9	15	9	7	18	13	29	23	15
794.43	459.33	621.14	858.27	469.65	0	935.96	639.06	1162.1	796.06	775.42	A0A178UFR7	NAD(P)-bd_dom domain-containing protein OS=Arabidopsis thaliana OX=3702 GN=AXX17_At5g01360 PE=4 SV=1	27119	Acetylation (N-term)	99.1	200.87	21	15	9	15	15	15	9	21	21	21	21	21	5	3	16	10	14	18	14	8	15	18	18	17	19
794.43	459.33	621.14	858.27	469.65	0	935.96	639.06	1162.1	796.06	775.42	Q94EG6	Uncharacterized protein At5g02240 OS=Arabidopsis thaliana OX=3702 GN=At5g02240 PE=1 SV=1	27103	Acetylation (N-term)	99.1	200.87	21	15	9	15	15	15	9	21	21	21	21	21	5	3	16	10	14	18	14	8	15	18	18	17	19
794.43	459.33	621.14	858.27	469.65	0	935.96	639.06	1162.1	796.06	775.42	A0A7G2F554	(thale cress) hypothetical protein OS=Arabidopsis thaliana OX=3702 GN=AT9943_LOCUS18108 PE=4 SV=1	40614	Acetylation (N-term)	99.1	200.87	15	10	6	10	10	10	6	15	15	15	15	15	5	3	16	10	14	18	14	8	15	18	18	17	19
794.43	459.33	621.14	858.27	469.65	0	935.96	639.06	1162.1	796.06	775.42	A0A7G2F804	(thale cress) hypothetical protein OS=Arabidopsis thaliana OX=3702 GN=AT9943_LOCUS18108 PE=4 SV=1	45901	Acetylation (N-term)	99.1	200.87	13	9	5	9	9	9	5	13	13	13	13	13	5	3	16	10	14	18	14	8	15	18	18	17	19
794.43	459.33	621.14	858.27	469.65	0	935.96	639.06	1162.1	796.06	775.42	A0A654FXJ1	NAD(P)-bd_dom domain-containing protein OS=Arabidopsis thaliana OX=3702 GN=At5g02240 PE=4 SV=1	44418	Acetylation (N-term)	99.1	200.87	13	9	5	9	9	9	5	13	13	13	13	13	5	3	16	10	14	18	14	8	15	18	18	17	19
794.43	459.33	621.14	858.27	469.65	0	935.96	639.06	1162.1	796.06	775.42	A0A5S9Y0Q5	NAD(P)-bd_dom domain-containing protein OS=Arabidopsis thaliana OX=3702 GN=C24_LOCUS20912 PE=4 SV=1	47129	Acetylation (N-term)	99.1	200.87	13	9	5	9	9	9	5	13	13	13	13	13	5	3	16	10	14	18	14	8	15	18	18	17	19
2371.2	808.83	1505.1	1886.8	1265.2	542.36	2093.8	1798.9	2318.5	2236.1	2288.8	O82662	Succinate--CoA ligase [ADP-forming] subunit beta mitochondrial OS=Arabidopsis thaliana OX=3702 GN=At2g20420 PE=1 SV=1	45346	Carbamidomethylation; Oxidation (M)	99.2	214.55	22	22	14	16	18	15	11	19	16	18	19	18	9	9	21	12	10	19	10	13	24	10	16	16	16
2371.2	808.83	1505.1	1886.8	1265.2	542.36	2093.8	1798.9	2318.5	2236.1	2288.8	A0A654EW41	Succinate--CoA ligase [ADP-forming] subunit beta mitochondrial OS=Arabidopsis thaliana OX=3702 GN=AN1_LOCUS8399 PE=3 SV=1	45346	Carbamidomethylation; Oxidation (M)	99.2	214.55	22	22	14	16	18	15	11	19	16	18	19	18	9	9	21	12	10	19	10	13	24	10	16	16	16
852.36	631.94	613.48	613.59	1017.9	416.58	886.23	1028.2	840.25	1087.4	1369.3	A0A654FQ13	HABP4_PAI-RBP1 domain-containing protein OS=Arabidopsis thaliana OX=3702 GN=AN1_LOCUS18384 PE=4 SV=1	37468	Oxidation (M)	99.1	252.46	21	18	17	17	15	17	9	18	20	18	20	17	8	6	15	11	16	10	13	12	19	18	20	17	16
852.36	631.94	613.48	613.59	1017.9	416.58	886.23	1028.2	840.25	1087.4	1369.3	O23523	RGG repeats nuclear RNA binding protein A OS=Arabidopsis thaliana OX=3702 GN=RGGA PE=1 SV=1	37468	Oxidation (M)	99.1	252.46	21	18	17	17	15	17	9	18	20	18	20	17	8	6	15	11	16	10	13	12	19	18	20	17	16
0			0					0		0	A0A7G2FGZ3	Plasma membrane ATPase OS=Arabidopsis thaliana OX=3702 GN=AT9943_LOCUS22410 PE=3 SV=1	103129	Oxidation (M)	99.2	263.5	12	11	5	5	12	6	5	5	5	9	7	5	10	1	20	8	13	25	15	10	17	17	16	11	13
0			0					0		0	Q93ZM8	Plasma membrane ATPase OS=Arabidopsis thaliana OX=3702 PE=2 SV=1	104494	Oxidation (M)	99.2	263.5	11	11	5	5	11	6	5	5	5	9	7	5	10	1	20	8	13	25	15	10	17	17	16	11	13
0			0					0		0	P20431	ATPase 3 plasma membrane-type OS=Arabidopsis thaliana OX=3702 GN=AHA3 PE=1 SV=2	104450	Oxidation (M)	99.2	263.5	11	11	5	5	11	6	5	5	5	9	7	5	10	1	20	8	13	25	15	10	17	17	16	11	13
0			0					0		0	A0A178UHY0	Plasma membrane ATPase OS=Arabidopsis thaliana OX=3702 GN=AXX17_At5g56620 PE=3 SV=1	104450	Oxidation (M)	99.2	263.5	11	11	5	5	11	6	5	5	5	9	7	5	10	1	20	8	13	25	15	10	17	17	16	11	13
1843.2	1857.4	2118.8	1050.8	1256.3	762.24	2831.6	1852.8	2449.6	1481.5	2076.2	A0A654ET38	Ferredoxin--nitrite reductase chloroplastic OS=Arabidopsis thaliana OX=3702 GN=At2g15620 PE=3 SV=1	65491	Carbamidomethylation; Oxidation (M)	99.2	282.18	29	19	13	15	15	5	4	20	18	18	14	17	15	15	20	11	14	15	5	6	16	23	24	12	19
1843.2	1857.4	2118.8	1050.8	1256.3	762.24	2831.6	1852.8	2449.6	1481.5	2076.2	A0A5S9WYB4	Ferredoxin--nitrite reductase chloroplastic OS=Arabidopsis thaliana OX=3702 GN=C24_LOCUS7780 PE=3 SV=1	65505	Carbamidomethylation; Oxidation (M)	99.2	282.18	29	19	13	15	15	5	4	20	18	18	14	17	15	15	20	11	14	15	5	6	16	23	24	12	19
1843.2	1857.4	2118.8	1050.8	1256.3	762.24	2831.6	1852.8	2449.6	1481.5	2076.2	Q39161	Ferredoxin--nitrite reductase chloroplastic OS=Arabidopsis thaliana OX=3702 GN=NIR1 PE=1 SV=1	65505	Carbamidomethylation; Oxidation (M)	99.2	282.18	29	19	13	15	15	5	4	20	18	18	14	17	15	15	20	11	14	15	5	6	16	23	24	12	19
1843.2	1857.4	2118.8	1050.8	1256.3	762.24	2831.6	1852.8	2449.6	1481.5	2076.2	A0A178VZP3	NIR1 OS=Arabidopsis thaliana OX=3702 GN=AXX17_At2g10780 PE=3 SV=1	65564	Carbamidomethylation; Oxidation (M)	99.2	282.18	29	19	13	15	15	5	4	20	18	18	14	17	15	15	20	11	14	15	5	6	16	23	24	12	19
3713.1	2684.5	3965.9	4430.6	3086.6	1654.8	4299.9	4238.9	5124.1	4238.8	4633.3	A0A7G2ELT2	(thale cress) hypothetical protein OS=Arabidopsis thaliana OX=3702 GN=AT9943_LOCUS11094 PE=3 SV=1	113516		99	208.14	3	3	3	3	3	3	2	3	3	3	3	3	6	6	13	12	15	18	15	11	17	14	16	21	12
3713.1	2684.5	3965.9	4430.6	3086.6	1654.8	4299.9	4238.9	5124.1	4238.8	4633.3	Q9ASV6	30S ribosomal protein S20 chloroplastic OS=Arabidopsis thaliana OX=3702 GN=RPS20 PE=2 SV=1	21826		98.7	208.14	17	17	17	17	17	17	12	17	17	17	17	17	6	6	13	12	15	18	15	11	17	14	16	21	12
3713.1	2684.5	3965.9	4430.6	3086.6	1654.8	4299.9	4238.9	5124.1	4238.8	4633.3	A0A178VMN1	PRPS20 OS=Arabidopsis thaliana OX=3702 GN=AXX17_At3g15850 PE=3 SV=1	21826		98.7	208.14	17	17	17	17	17	17	12	17	17	17	17	17	6	6	13	12	15	18	15	11	17	14	16	21	12
3970.8	2801.5	4609.5	4367.4	3393.1	1522.7	5681.1	4736.1	5352.2	4706.5	5403.1	A0A654FJ05	60S ribosomal protein L11 OS=Arabidopsis thaliana OX=3702 GN=At3g58700 PE=3 SV=1	23228	Carbamidomethylation; Oxidation (M)	99.1	198.74	20	20	20	20	20	16	16	20	20	20	20	20	4	4	14	10	16	20	12	7	20	15	18	16	16
3970.8	2801.5	4609.5	4367.4	3393.1	1522.7	5681.1	4736.1	5352.2	4706.5	5403.1	Q0WQZ1	60S ribosomal protein L11B OS=Arabidopsis thaliana OX=3702 GN=At2g42740 PE=2 SV=1	20831	Carbamidomethylation; Oxidation (M)	99	198.74	22	22	22	22	22	18	18	22	22	22	22	22	4	4	14	10	16	20	12	7	20	15	18	16	16
3970.8	2801.5	4609.5	4367.4	3393.1	1522.7	5681.1	4736.1	5352.2	4706.5	5403.1	P42795	60S ribosomal protein L11-1 OS=Arabidopsis thaliana OX=3702 GN=RPL11A PE=1 SV=2	20831	Carbamidomethylation; Oxidation (M)	99	198.74	22	22	22	22	22	18	18	22	22	22	22	22	4	4	14	10	16	20	12	7	20	15	18	16	16
3970.8	2801.5	4609.5	4367.4	3393.1	1522.7	5681.1	4736.1	5352.2	4706.5	5403.1	P42794	60S ribosomal protein L11-2 OS=Arabidopsis thaliana OX=3702 GN=RPL11D PE=2 SV=2	20861	Carbamidomethylation; Oxidation (M)	99	198.74	22	22	22	22	22	18	18	22	22	22	22	22	4	4	14	10	16	20	12	7	20	15	18	16	16
3970.8	2801.5	4609.5	4367.4	3393.1	1522.7	5681.1	4736.1	5352.2	4706.5	5403.1	A0A178UAV2	(thale cress) hypothetical protein OS=Arabidopsis thaliana OX=3702 GN=AXX17_At3g53250 PE=3 SV=1	20861	Carbamidomethylation; Oxidation (M)	99	198.74	22	22	22	22	22	18	18	22	22	22	22	22	4	4	14	10	16	20	12	7	20	15	18	16	16
3970.8	2801.5	4609.5	4367.4	3393.1	1522.7	5681.1	4736.1	5352.2	4706.5	5403.1	A0A384KRK7	(thale cress) hypothetical protein OS=Arabidopsis thaliana OX=3702 GN=AXX17_At2g40140 PE=3 SV=1	20831	Carbamidomethylation; Oxidation (M)	99	198.74	22	22	22	22	22	18	18	22	22	22	22	22	4	4	14	10	16	20	12	7	20	15	18	16	16
3970.8	2801.5	4609.5	4367.4	3393.1	1522.7	5681.1	4736.1	5352.2	4706.5	5403.1	A0A654FR40	60S ribosomal protein L11 OS=Arabidopsis thaliana OX=3702 GN=At3g58700 PE=3 SV=1	21102	Carbamidomethylation; Oxidation (M)	99	198.74	22	22	22	22	22	17	17	22	22	22	22	22	4	4	14	10	16	20	12	7	20	15	18	16	16
3970.8	2801.5	4609.5	4367.4	3393.1	1522.7	5681.1	4736.1	5352.2	4706.5	5403.1	A0A654G886	60S ribosomal protein L11 OS=Arabidopsis thaliana OX=3702 GN=At3g58700 PE=3 SV=1	21491	Carbamidomethylation; Oxidation (M)	99	198.74	21	21	21	21	21	17	17	21	21	21	21	21	4	4	14	10	16	20	12	7	20	15	18	16	16
3970.8	2801.5	4609.5	4367.4	3393.1	1522.7	5681.1	4736.1	5352.2	4706.5	5403.1	A0A7G2F1N1	(thale cress) hypothetical protein OS=Arabidopsis thaliana OX=3702 GN=AT9943_LOCUS16019 PE=3 SV=1	18524	Carbamidomethylation; Oxidation (M)	99	198.74	25	25	25	25	25	20	20	25	25	25	25	25	4	4	14	10	16	20	12	7	20	15	18	16	16
92.186	82.729	0		0		84.378		112.54	0	184.96	F4IVR2	Heat shock protein 60-2 OS=Arabidopsis thaliana OX=3702 GN=HSP60-2 PE=1 SV=1	61478	Oxidation (M)	99.2	228.31	27	13	8	15	10	13	10	16	8	23	12	14	14	5	12	7	16	16	16	12	18	9	23	18	16
92.186	82.729	0		0		84.378		112.54	0	184.96	A0A178VPJ6	HSP60-2 OS=Arabidopsis thaliana OX=3702 GN=AXX17_At2g29650 PE=3 SV=1	61861	Oxidation (M)	99.2	228.31	26	13	8	15	10	13	10	16	8	23	12	14	14	5	12	7	16	16	16	12	18	9	23	18	16
92.186	82.729	0		0		84.378		112.54	0	184.96	Q8L7B5	Chaperonin CPN60-like 1 mitochondrial OS=Arabidopsis thaliana OX=3702 GN=At2g33210 PE=1 SV=1	61979	Oxidation (M)	99.2	228.31	26	13	8	15	10	13	10	16	8	23	12	14	14	5	12	7	16	16	16	12	18	9	23	18	16
92.186	82.729	0		0		84.378		112.54	0	184.96	A0A7G2EE21	(thale cress) hypothetical protein OS=Arabidopsis thaliana OX=3702 GN=AT9943_LOCUS8356 PE=3 SV=1	103245	Oxidation (M)	99.2	228.31	16	8	5	9	6	8	6	10	5	14	7	9	14	5	12	7	16	16	16	12	18	9	23	18	16
1141.5	325.43	1119.9	900.94	904.69	651.45	1300.3	903	916.79	1052.4	1314.1	O48963	Phototropin-1 OS=Arabidopsis thaliana OX=3702 GN=PHOT1 PE=1 SV=1	111689	Carbamidomethylation; Oxidation (M); Acetylation (N-term)	99.2	254.99	15	10	9	12	9	12	6	13	12	12	14	14	13	12	13	13	15	14	13	5	19	15	16	16	24
1141.5	325.43	1119.9	900.94	904.69	651.45	1300.3	903	916.79	1052.4	1314.1	A0A178VFT4	RPT1 OS=Arabidopsis thaliana OX=3702 GN=AXX17_At3g39640 PE=4 SV=1	111689	Carbamidomethylation; Oxidation (M); Acetylation (N-term)	99.2	254.99	15	10	9	12	9	12	6	13	12	12	14	14	13	12	13	13	15	14	13	5	19	15	16	16	24
1141.5	325.43	1119.9	900.94	904.69	651.45	1300.3	903	916.79	1052.4	1314.1	A0A5S9XIZ0	LOV domain-containing protein OS=Arabidopsis thaliana OX=3702 GN=C24_LOCUS14793 PE=4 SV=1	111701	Carbamidomethylation; Oxidation (M); Acetylation (N-term)	99.2	254.99	15	10	9	12	9	12	6	13	12	12	14	14	13	12	13	13	15	14	13	5	19	15	16	16	24
2865.3	811.46	2705.4	1339	1592.2	240.74	2429	2425.4	2604.3	2351.6	1535.7	A0A178VU78	glutathione transferase OS=Arabidopsis thaliana OX=3702 GN=AXX17_At2g26990 PE=3 SV=1	24230		99.1	210.71	31	18	14	18	14	18	9	18	20	25	18	14	6	5	19	15	15	12	8	5	18	13	20	23	15
2865.3	811.46	2705.4	1339	1592.2	240.74	2429	2425.4	2604.3	2351.6	1535.7	P42761	Glutathione S-transferase F10 OS=Arabidopsis thaliana OX=3702 GN=GSTF10 PE=1 SV=3	24230		99.1	210.71	31	18	14	18	14	18	9	18	20	25	18	14	6	5	19	15	15	12	8	5	18	13	20	23	15
3287.9	1616.6	2051.5	3475.5	2137.7	1624.5	2548.5	3279.8	3632	3543.4	3383.2	A0A384L5D6	VIPP1 OS=Arabidopsis thaliana OX=3702 GN=At1g65260 PE=3 SV=1	28913	Oxidation (M)	99.2	290.32	45	31	19	24	36	24	18	31	36	37	35	36	10	10	14	10	9	17	13	10	17	14	26	17	16
3287.9	1616.6	2051.5	3475.5	2137.7	1624.5	2548.5	3279.8	3632	3543.4	3383.2	A0A178W0D3	Plastid transcriptionally active 4 OS=Arabidopsis thaliana OX=3702 GN=PTAC4 PE=1 SV=1	28913	Oxidation (M)	99.2	290.32	45	31	19	24	36	24	18	31	36	37	35	36	10	10	14	10	9	17	13	10	17	14	26	17	16
3287.9	1616.6	2051.5	3475.5	2137.7	1624.5	2548.5	3279.8	3632	3543.4	3383.2	A0A654EMV2	Membrane-associated 30 kDa protein chloroplastic OS=Arabidopsis thaliana OX=3702 GN=AN1_LOCUS5531 PE=3 SV=1	36376	Oxidation (M)	99.2	290.32	35	24	15	18	28	18	14	24	28	29	28	28	10	10	14	10	9	17	13	10	17	14	26	17	16
3287.9	1616.6	2051.5	3475.5	2137.7	1624.5	2548.5	3279.8	3632	3543.4	3383.2	O80796	Membrane-associated protein VIPP1 chloroplastic OS=Arabidopsis thaliana OX=3702 GN=VIPP1 PE=1 SV=1	36392	Oxidation (M)	99.2	290.32	35	24	15	18	28	18	14	24	28	29	28	28	10	10	14	10	9	17	13	10	17	14	26	17	16
								26.396	171.2	18.823	A0A178VEN0	HSP60-3B OS=Arabidopsis thaliana OX=3702 GN=AXX17_At3g25900 PE=3 SV=1	61281	Oxidation (M)	99.2	229.62	20	11	7	11	10	11	10	12	8	18	13	12	11	2	11	6	14	16	15	12	15	9	27	18	19
								26.396	171.2	18.823	P29197	Chaperonin CPN60 mitochondrial OS=Arabidopsis thaliana OX=3702 GN=CPN60 PE=1 SV=2	61281	Oxidation (M)	99.2	229.62	20	11	7	11	10	11	10	12	8	18	13	12	11	2	11	6	14	16	15	12	15	9	27	18	19
								26.396	171.2	18.823	A0A7G2EQ33	(thale cress) hypothetical protein OS=Arabidopsis thaliana OX=3702 GN=AT9943_LOCUS11898 PE=3 SV=1	137932	Oxidation (M)	99.2	229.62	9	5	3	5	5	5	5	6	4	8	6	6	11	2	11	6	14	16	15	12	15	9	27	18	19
5731.3	2720.5	4389.6	4933.7	3885.1	2003	5673.9	6047.6	6231.9	5387.4	5780.6	A0A654EQ71	Bulb-type lectin domain-containing protein OS=Arabidopsis thaliana OX=3702 GN=AN1_LOCUS6927 PE=4 SV=1	50343	Carbamidomethylation; Oxidation (M)	99.1	183.28	15	15	15	15	15	15	13	15	15	12	15	13	6	4	23	14	14	18	17	11	12	15	10	16	12
5731.3	2720.5	4389.6	4933.7	3885.1	2003	5673.9	6047.6	6231.9	5387.4	5780.6	Q9ZVA2	EP1-like glycoprotein 2 OS=Arabidopsis thaliana OX=3702 GN=At1g78830 PE=1 SV=1	50343	Carbamidomethylation; Oxidation (M)	99.1	183.28	15	15	15	15	15	15	13	15	15	12	15	13	6	4	23	14	14	18	17	11	12	15	10	16	12
	0	146.25	85.229	89.925		0	224.79	9.8929	139.74	149.18	A0A178VET0	phosphoenolpyruvate carboxylase OS=Arabidopsis thaliana OX=3702 GN=AXX17_At3g15580 PE=3 SV=1	110229	Carbamidomethylation; Oxidation (M)	99.2	199.21	11	6	6	8	8	8	5	7	6	11	7	8	11	2	12	12	19	16	13	11	18	8	19	14	18
	0	146.25	85.229	89.925		0	224.79	9.8929	139.74	149.18	Q84VW9	Phosphoenolpyruvate carboxylase 3 OS=Arabidopsis thaliana OX=3702 GN=PPC3 PE=1 SV=2	110160	Carbamidomethylation; Oxidation (M)	99.2	199.21	11	6	6	8	8	8	5	7	6	11	7	8	11	2	12	12	19	16	13	11	18	8	19	14	18
										0	A0A7G2EV44	(thale cress) hypothetical protein OS=Arabidopsis thaliana OX=3702 GN=AT9943_LOCUS12719 PE=3 SV=1	38166	Carbamidomethylation; Oxidation (M)	99.1	257.87	24	15	15	13	15	13	13	13	15	18	13	21	9	1	14	15	6	16	10	17	17	19	17	14	15
3979.1	3747.7	3955	4045.2	3735.3	3163.7	4081.8	3644.7	4368	4117.1	4211	A0A178VF16	malate dehydrogenase OS=Arabidopsis thaliana OX=3702 GN=AXX17_At3g41510 PE=3 SV=1	42422	Oxidation (M)	99.1	226.95	22	14	15	15	14	14	15	14	15	22	15	17	8	8	13	16	14	12	14	15	13	13	19	15	15
3979.1	3747.7	3955	4045.2	3735.3	3163.7	4081.8	3644.7	4368	4117.1	4211	A0A654FEK4	malate dehydrogenase OS=Arabidopsis thaliana OX=3702 GN=AN1_LOCUS15088 PE=3 SV=1	42406	Oxidation (M)	99.1	226.95	22	14	15	15	14	14	15	14	15	22	15	17	8	8	13	16	14	12	14	15	13	13	19	15	15
3979.1	3747.7	3955	4045.2	3735.3	3163.7	4081.8	3644.7	4368	4117.1	4211	Q9SN86	Malate dehydrogenase chloroplastic OS=Arabidopsis thaliana OX=3702 GN=At3g47520 PE=1 SV=1	42406	Oxidation (M)	99.1	226.95	22	14	15	15	14	14	15	14	15	22	15	17	8	8	13	16	14	12	14	15	13	13	19	15	15
2878.2	2853.1	3231.1	3310.5	2963.1	2067.1	3972.2	2990.8	1378.3	3395.4	4089.9	A0A178VF24	(thale cress) hypothetical protein OS=Arabidopsis thaliana OX=3702 GN=AXX17_At3g44090 PE=3 SV=1	16945	Oxidation (M)	98.8	235.1	38	29	32	27	38	35	32	34	38	35	34	33	8	8	13	13	11	20	18	12	14	14	13	15	15
2878.2	2853.1	3231.1	3310.5	2963.1	2067.1	3972.2	2990.8	1378.3	3395.4	4089.9	P51414	60S ribosomal protein L26-1 OS=Arabidopsis thaliana OX=3702 GN=RPL26A PE=2 SV=2	16945	Oxidation (M)	98.8	235.1	38	29	32	27	38	35	32	34	38	35	34	33	8	8	13	13	11	20	18	12	14	14	13	15	15
1588.5	1676.7	1490.5	918.19	1302.2	1006.3	1910.5	1594.8	2139.7	1540.3	2404.3	A0A178UYS9	peptide-methionine (S)-S-oxide reductase OS=Arabidopsis thaliana OX=3702 GN=AXX17_At4g29030 PE=3 SV=1	28616		99	189.61	17	17	12	17	17	17	8	17	17	17	17	17	4	4	15	8	18	20	21	7	14	11	14	14	15
1588.5	1676.7	1490.5	918.19	1302.2	1006.3	1910.5	1594.8	2139.7	1540.3	2404.3	P54150	Peptide methionine sulfoxide reductase A4 chloroplastic OS=Arabidopsis thaliana OX=3702 GN=MSR4 PE=1 SV=2	28644		99	189.61	17	17	12	17	17	17	8	17	17	17	17	17	4	4	15	8	18	20	21	7	14	11	14	14	15
1588.5	1676.7	1490.5	918.19	1302.2	1006.3	1910.5	1594.8	2139.7	1540.3	2404.3	A0A5S9XWK0	peptide-methionine (S)-S-oxide reductase OS=Arabidopsis thaliana OX=3702 GN=C24_LOCUS19156 PE=3 SV=1	28644		99	189.61	17	17	12	17	17	17	8	17	17	17	17	17	4	4	15	8	18	20	21	7	14	11	14	14	15
1588.5	1676.7	1490.5	918.19	1302.2	1006.3	1910.5	1594.8	2139.7	1540.3	2404.3	A0A7G2F0R0	peptide-methionine (S)-S-oxide reductase OS=Arabidopsis thaliana OX=3702 GN=AT9943_LOCUS16607 PE=3 SV=1	22983		98.9	189.61	21	21	16	21	21	21	10	21	21	21	21	21	4	4	15	8	18	20	21	7	14	11	14	14	15
1958.3	2093.9	1975.2	1971.7	1844.9	1680.8	2330.8	1644.3	2042.7	2023.8	2168.7	P49200	40S ribosomal protein S20-1 OS=Arabidopsis thaliana OX=3702 GN=RPS20C PE=2 SV=2	13878	Carbamidomethylation; Oxidation (M); Acetylation (N-term)	98.8	158.39	34	34	24	34	34	24	24	24	34	34	34	34	4	2	17	13	18	20	14	7	15	11	12	17	12
1958.3	2093.9	1975.2	1971.7	1844.9	1680.8	2330.8	1644.3	2042.7	2023.8	2168.7	A0A178V9U8	Ribosomal_S10 domain-containing protein OS=Arabidopsis thaliana OX=3702 GN=AXX17_At3g38850 PE=3 SV=1	13878	Carbamidomethylation; Oxidation (M); Acetylation (N-term)	98.8	158.39	34	34	24	34	34	24	24	24	34	34	34	34	4	2	17	13	18	20	14	7	15	11	12	17	12
123.16	121.63	97.322	792.41	362.08	347.72	370.29	125.63	269.34	1777.7	2085.7	P18612	Stress-induced protein KIN1 OS=Arabidopsis thaliana OX=3702 GN=KIN1 PE=2 SV=1	6495	Acetylation (N-term)	99.1	266.85	91	41	64	64	91	91	80	83	67	61	91	91	9	6	10	7	9	23	12	14	15	13	11	21	21
123.16	121.63	97.322	792.41	362.08	347.72	370.29	125.63	269.34	1777.7	2085.7	A0A178UK02	(thale cress) hypothetical protein OS=Arabidopsis thaliana OX=3702 GN=AXX17_At5g15530 PE=4 SV=1	6495	Acetylation (N-term)	99.1	266.85	91	41	64	64	91	91	80	83	67	61	91	91	9	6	10	7	9	23	12	14	15	13	11	21	21
1783	1735.6	1653.7	1743.4	1160.4	1007.5	2419.8	1242.1	2029.5	1695.8	2021.5	F4K7T6	1-deoxy-D-xylulose-5-phosphate reductoisomerase OS=Arabidopsis thaliana OX=3702 GN=DXR PE=1 SV=1	54229	Oxidation (M)	99.2	235.71	18	12	12	12	10	10	8	12	10	16	10	10	7	7	11	17	16	13	15	9	18	14	16	14	13
1783	1735.6	1653.7	1743.4	1160.4	1007.5	2419.8	1242.1	2029.5	1695.8	2021.5	Q9XFS9	1-deoxy-D-xylulose 5-phosphate reductoisomerase chloroplastic OS=Arabidopsis thaliana OX=3702 GN=DXR PE=2 SV=2	51964	Oxidation (M)	99.2	235.71	18	13	13	13	11	11	8	13	11	16	11	11	7	7	11	17	16	13	15	9	18	14	16	14	13
2932.9	2299.5	2547	3377	2418.6	1733.8	3375	2688.6	3480.5	2828.9	3566.3	P57752	Acyl-CoA-binding domain-containing protein 6 OS=Arabidopsis thaliana OX=3702 GN=ACBP6 PE=1 SV=1	10386	Oxidation (M)	98.9	178.17	41	39	23	39	41	39	23	39	39	41	23	39	4	4	13	11	13	14	12	10	19	13	13	15	23
2932.9	2299.5	2547	3377	2418.6	1733.8	3375	2688.6	3480.5	2828.9	3566.3	A0A178WJ33	(thale cress) hypothetical protein OS=Arabidopsis thaliana OX=3702 GN=AXX17_At1g32410 PE=3 SV=1	10386	Oxidation (M)	98.9	178.17	41	39	23	39	41	39	23	39	39	41	23	39	4	4	13	11	13	14	12	10	19	13	13	15	23
2738.6	2520.9	2020.9	3123.3	2170	1556.7	2500.1	1350.1	2978.5	1545.5	2512.4	A0A178VGT1	peptidylprolyl isomerase OS=Arabidopsis thaliana OX=3702 GN=AXX17_At3g00580 PE=4 SV=1	47982	Carbamidomethylation; Oxidation (M)	99.2	236.74	23	15	10	9	21	14	10	18	15	18	10	15	8	8	15	14	6	20	15	8	13	16	21	15	12
2738.6	2520.9	2020.9	3123.3	2170	1556.7	2500.1	1350.1	2978.5	1545.5	2512.4	Q9SSA5	Peptidyl-prolyl cis-trans isomerase CYP38 chloroplastic OS=Arabidopsis thaliana OX=3702 GN=CYP38 PE=1 SV=1	47982	Carbamidomethylation; Oxidation (M)	99.2	236.74	23	15	10	9	21	14	10	18	15	18	10	15	8	8	15	14	6	20	15	8	13	16	21	15	12
3304.1	1909.5	2400.8	2964.9	1807.5	1373.5	3111.9	2654.8	2384	2501.2	3498.3	O22160	Thylakoid lumenal 15 kDa protein 1 chloroplastic OS=Arabidopsis thaliana OX=3702 GN=At2g44920 PE=1 SV=2	23779		99.1	242.92	41	24	24	24	27	24	24	29	24	33	24	29	7	7	14	11	14	16	15	12	14	13	14	14	18
3304.1	1909.5	2400.8	2964.9	1807.5	1373.5	3111.9	2654.8	2384	2501.2	3498.3	A0A178VSS7	Thylakoid lumenal 15 kDa protein 1 chloroplastic OS=Arabidopsis thaliana OX=3702 GN=AXX17_At2g42510 PE=4 SV=1	23779		99.1	242.92	41	24	24	24	27	24	24	29	24	33	24	29	7	7	14	11	14	16	15	12	14	13	14	14	18
3304.1	1909.5	2400.8	2964.9	1807.5	1373.5	3111.9	2654.8	2384	2501.2	3498.3	A0A7G2EI71	(thale cress) hypothetical protein OS=Arabidopsis thaliana OX=3702 GN=AT9943_LOCUS9472 PE=4 SV=1	25999		99.1	242.92	38	22	22	22	25	22	22	27	22	30	22	27	7	7	14	11	14	16	15	12	14	13	14	14	18
699.89	818.84	738.36	267.65	775.27	397.77	1051.8	654.28	580.24	966.19	983.45	A0A7G2EBP2	(thale cress) hypothetical protein OS=Arabidopsis thaliana OX=3702 GN=AT9943_LOCUS8640 PE=3 SV=1	49188	Oxidation (M)	99.1	252.1	21	21	18	21	19	18	18	21	18	13	21	18	7	5	15	15	13	12	13	15	17	14	11	17	13
699.89	818.84	738.36	267.65	775.27	397.77	1051.8	654.28	580.24	966.19	983.45	A0A178VTX0	FTSZ2-1 OS=Arabidopsis thaliana OX=3702 GN=AXX17_At2g32900 PE=3 SV=1	50722	Oxidation (M)	99.1	252.1	20	20	18	20	18	18	18	20	18	13	20	18	7	5	15	15	13	12	13	15	17	14	11	17	13
699.89	818.84	738.36	267.65	775.27	397.77	1051.8	654.28	580.24	966.19	983.45	O82533	Cell division protein FtsZ homolog 2-1 chloroplastic OS=Arabidopsis thaliana OX=3702 GN=FTSZ2-1 PE=1 SV=2	50722	Oxidation (M)	99.1	252.1	20	20	18	20	18	18	18	20	18	13	20	18	7	5	15	15	13	12	13	15	17	14	11	17	13
699.89	818.84	738.36	267.65	775.27	397.77	1051.8	654.28	580.24	966.19	983.45	A0A1P8AXD8	Tubulin/FtsZ family protein OS=Arabidopsis thaliana OX=3702 GN=FTSZ2-1 PE=1 SV=1	41583	Oxidation (M)	99.1	252.1	24	24	21	24	22	21	21	24	21	15	24	21	7	5	15	15	13	12	13	15	17	14	11	17	13
3441.3	2547.5	3341	3472	2460.9	1597.7	4421.5	1939.3	4155.4	3399.2	4173.3	A0A178V1X0	Serine hydroxymethyltransferase OS=Arabidopsis thaliana OX=3702 GN=AXX17_At4g15890 PE=3 SV=1	51718	Oxidation (M)	99.2	233.87	21	17	13	17	16	13	9	15	14	17	15	15	9	9	17	14	15	16	11	7	14	16	15	16	13
3441.3	2547.5	3341	3472	2460.9	1597.7	4421.5	1939.3	4155.4	3399.2	4173.3	A0A654FNZ9	Serine hydroxymethyltransferase OS=Arabidopsis thaliana OX=3702 GN=AN1_LOCUS18008 PE=3 SV=1	51718	Oxidation (M)	99.2	233.87	21	17	13	17	16	13	9	15	14	17	15	15	9	9	17	14	15	16	11	7	14	16	15	16	13
3441.3	2547.5	3341	3472	2460.9	1597.7	4421.5	1939.3	4155.4	3399.2	4173.3	O23254	Serine hydroxymethyltransferase 4 OS=Arabidopsis thaliana OX=3702 GN=SHM4 PE=1 SV=1	51718	Oxidation (M)	99.2	233.87	21	17	13	17	16	13	9	15	14	17	15	15	9	9	17	14	15	16	11	7	14	16	15	16	13
3441.3	2547.5	3341	3472	2460.9	1597.7	4421.5	1939.3	4155.4	3399.2	4173.3	A0A7G2F299	Serine hydroxymethyltransferase OS=Arabidopsis thaliana OX=3702 GN=AT9943_LOCUS15519 PE=3 SV=1	51744	Oxidation (M)	99.2	233.87	21	17	13	17	16	13	9	15	14	17	15	15	9	9	17	14	15	16	11	7	14	16	15	16	13
1119.9	928.76	748.79	1140.6	777.66	568.46	1590.2	926.64	1224	1266.9	1436.2	B3LF87	At1g30230 OS=Arabidopsis thaliana OX=3702 PE=2 SV=1	25132	Oxidation (M); Acetylation (N-term)	98.9	173.74	20	20	14	14	20	20	10	20	20	16	20	20	6	2	17	12	10	18	13	9	16	13	16	13	17
1119.9	928.76	748.79	1140.6	777.66	568.46	1590.2	926.64	1224	1266.9	1436.2	P48006	Elongation factor 1-delta 1 OS=Arabidopsis thaliana OX=3702 GN=At1g30230 PE=1 SV=2	25132	Oxidation (M); Acetylation (N-term)	98.9	173.74	20	20	14	14	20	20	10	20	20	16	20	20	6	2	17	12	10	18	13	9	16	13	16	13	17
1119.9	928.76	748.79	1140.6	777.66	568.46	1590.2	926.64	1224	1266.9	1436.2	A0A654EFT3	EF1_GNE domain-containing protein OS=Arabidopsis thaliana OX=3702 GN=AN1_LOCUS3065 PE=3 SV=1	26492	Oxidation (M); Acetylation (N-term)	98.9	173.74	19	19	14	13	19	19	9	19	19	15	19	19	6	2	17	12	10	18	13	9	16	13	16	13	17
1119.9	928.76	748.79	1140.6	777.66	568.46	1590.2	926.64	1224	1266.9	1436.2	A0A5S9WDQ1	EF1_GNE domain-containing protein OS=Arabidopsis thaliana OX=3702 GN=At1g30230 PE=3 SV=1	26506	Oxidation (M); Acetylation (N-term)	98.9	173.74	19	19	14	13	19	19	9	19	19	15	19	19	6	2	17	12	10	18	13	9	16	13	16	13	17
1119.9	928.76	748.79	1140.6	777.66	568.46	1590.2	926.64	1224	1266.9	1436.2	A0A7G2E0D9	(thale cress) hypothetical protein OS=Arabidopsis thaliana OX=3702 GN=AT9943_LOCUS2531 PE=3 SV=1	26453	Oxidation (M); Acetylation (N-term)	98.9	173.74	19	19	14	13	19	19	9	19	19	15	19	19	6	2	17	12	10	18	13	9	16	13	16	13	17
1119.9	928.76	748.79	1140.6	777.66	568.46	1590.2	926.64	1224	1266.9	1436.2	A8MRC4	Translation elongation factor EF1B/ribosomal protein S6 family protein OS=Arabidopsis thaliana OX=3702 GN=eEF-1Bb1 PE=1 SV=1	28777	Oxidation (M); Acetylation (N-term)	98.9	173.74	18	18	13	12	18	18	8	18	18	14	18	18	6	2	17	12	10	18	13	9	16	13	16	13	17
8950.2	1307.7	1239.7	7555.9	6550.7	4971.2	7010.9	1637.9	1466.3	1431.9	1335	A0A178W9Z8	(thale cress) hypothetical protein OS=Arabidopsis thaliana OX=3702 GN=AXX17_At1g52980 PE=3 SV=1	165082	Oxidation (M); Acetylation (N-term)	99.2	258.47	12	8	5	5	6	7	3	7	6	8	7	7	15	15	20	9	11	14	15	6	18	16	18	11	15
8950.2	1307.7	1239.7	7555.9	6550.7	4971.2	7010.9	1637.9	1466.3	1431.9	1335	Q9XIE2	ABC transporter G family member 36 OS=Arabidopsis thaliana OX=3702 GN=ABCG36 PE=1 SV=1	165081	Oxidation (M); Acetylation (N-term)	99.2	258.47	12	8	5	5	6	7	3	7	6	8	7	7	15	15	20	9	11	14	15	6	18	16	18	11	15
6352.6	10239	5342.1	6115.4	5126.3	5314.8	6053.4	4808.6	6029.6	6408.8	6375.2	Q8L8U4	Uncharacterized protein OS=Arabidopsis thaliana OX=3702 PE=2 SV=1	9860		61.7	152.57	15	15	15	15	15	15	15	15	15	15	15	15	2	2	15	13	15	14	13	12	16	9	16	13	17
6352.6	10239	5342.1	6115.4	5126.3	5314.8	6053.4	4808.6	6029.6	6408.8	6375.2	O22914	Calvin cycle protein CP12-1 chloroplastic OS=Arabidopsis thaliana OX=3702 GN=CP12-1 PE=1 SV=1	13487		61.7	152.57	10	10	10	10	10	10	10	10	10	10	10	10	2	2	15	13	15	14	13	12	16	9	16	13	17
6352.6	10239	5342.1	6115.4	5126.3	5314.8	6053.4	4808.6	6029.6	6408.8	6375.2	A0A178VSF3	(thale cress) hypothetical protein OS=Arabidopsis thaliana OX=3702 GN=AXX17_At2g45160 PE=4 SV=1	13487		61.7	152.57	10	10	10	10	10	10	10	10	10	10	10	10	2	2	15	13	15	14	13	12	16	9	16	13	17
1570.5	568.5	714.24	1129.7	781.36	350.76	946.3	805.21	1589.6	1251.1	1315.4	A0A1P8AWY1	High chlorophyll fluorescence phenotype 173 OS=Arabidopsis thaliana OX=3702 GN=HCF173 PE=1 SV=1	61830	Carbamidomethylation; Oxidation (M)	99.2	264.08	23	13	8	17	16	8	8	15	14	19	15	17	11	11	16	10	16	14	9	9	14	12	19	13	20
1570.5	568.5	714.24	1129.7	781.36	350.76	946.3	805.21	1589.6	1251.1	1315.4	A0A7G2DTQ6	(thale cress) hypothetical protein OS=Arabidopsis thaliana OX=3702 GN=AT9943_LOCUS1439 PE=4 SV=1	64280	Carbamidomethylation; Oxidation (M)	99.2	264.08	22	12	8	16	15	8	8	14	14	18	15	16	11	11	16	10	16	14	9	9	14	12	19	13	20
1570.5	568.5	714.24	1129.7	781.36	350.76	946.3	805.21	1589.6	1251.1	1315.4	A0A178WDD3	HCF173 OS=Arabidopsis thaliana OX=3702 GN=AXX17_At1g17490 PE=4 SV=1	65697	Carbamidomethylation; Oxidation (M)	99.2	264.08	22	12	7	16	15	7	7	14	13	18	15	16	11	11	16	10	16	14	9	9	14	12	19	13	20
1570.5	568.5	714.24	1129.7	781.36	350.76	946.3	805.21	1589.6	1251.1	1315.4	Q8W4D6	Protein HIGH CHLOROPHYLL FLUORESCENCE PHENOTYPE 173 chloroplastic OS=Arabidopsis thaliana OX=3702 GN=HCF173 PE=1 SV=1	65709	Carbamidomethylation; Oxidation (M)	99.2	264.08	22	12	7	16	15	7	7	14	13	18	15	16	11	11	16	10	16	14	9	9	14	12	19	13	20
			7375.2	4584	3737.5			4070.5	5820.3	5768.6	Q9ZW31	17.6 kDa class I heat shock protein 2 OS=Arabidopsis thaliana OX=3702 GN=HSP17.6B PE=2 SV=1	17563	Oxidation (M); Acetylation (N-term)	99.2	212.13	52	0	0	0	39	51	33	0	0	46	45	38	10	5	0	0	0	35	19	16	0	0	25	24	33
			7375.2	4584	3737.5			4070.5	5820.3	5768.6	A0A178VX53	(thale cress) hypothetical protein OS=Arabidopsis thaliana OX=3702 GN=AXX17_At2g25580 PE=3 SV=1	17563	Oxidation (M); Acetylation (N-term)	99.2	212.13	52	0	0	0	39	51	33	0	0	46	45	38	10	5	0	0	0	35	19	16	0	0	25	24	33
				23.788				170.39	0	0	Q29PY2	At5g12110 OS=Arabidopsis thaliana OX=3702 PE=2 SV=1	24789	Oxidation (M); Acetylation (N-term)	99.1	205.45	29	11	10	10	11	16	10	11	11	24	18	23	6	3	15	10	12	14	8	11	20	14	19	14	14
				23.788				170.39	0	0	Q84WM9	Elongation factor 1-beta 1 OS=Arabidopsis thaliana OX=3702 GN=At5g12110 PE=2 SV=2	24789	Oxidation (M); Acetylation (N-term)	99.1	205.45	29	11	10	10	11	16	10	11	11	24	18	23	6	3	15	10	12	14	8	11	20	14	19	14	14
				23.788				170.39	0	0	A0A384KQ94	(thale cress) hypothetical protein OS=Arabidopsis thaliana OX=3702 GN=AXX17_At5g11840 PE=3 SV=1	24789	Oxidation (M); Acetylation (N-term)	99.1	205.45	29	11	10	10	11	16	10	11	11	24	18	23	6	3	15	10	12	14	8	11	20	14	19	14	14
				23.788				170.39	0	0	A0A5S9Y4A5	EF1_GNE domain-containing protein OS=Arabidopsis thaliana OX=3702 GN=C24_LOCUS21900 PE=3 SV=1	24819	Oxidation (M); Acetylation (N-term)	99.1	205.45	29	11	10	10	11	16	10	11	11	24	18	23	6	3	15	10	12	14	8	11	20	14	19	14	14
3347.9	4461.8	4475.5	1513.7	2903.9	3061.2	4273.4	3897	6767.7	1445.7	4958.4	A0A654FKC9	Ribosomal protein OS=Arabidopsis thaliana OX=3702 GN=AN1_LOCUS16741 PE=3 SV=1	37584	Carbamidomethylation; Oxidation (M)	99.2	224.72	29	22	13	15	19	13	8	18	18	27	18	24	9	9	13	7	10	12	10	8	15	13	30	9	23
3347.9	4461.8	4475.5	1513.7	2903.9	3061.2	4273.4	3897	6767.7	1445.7	4958.4	Q9LY66	50S ribosomal protein L1 chloroplastic OS=Arabidopsis thaliana OX=3702 GN=RPL1 PE=1 SV=1	37632	Carbamidomethylation; Oxidation (M)	99.2	224.72	29	22	13	15	19	13	8	18	18	27	18	24	9	9	13	7	10	12	10	8	15	13	30	9	23
3347.9	4461.8	4475.5	1513.7	2903.9	3061.2	4273.4	3897	6767.7	1445.7	4958.4	A0A178VJ02	Ribosomal protein OS=Arabidopsis thaliana OX=3702 GN=AXX17_At3g57760 PE=3 SV=1	37568	Carbamidomethylation; Oxidation (M)	99.2	224.72	29	22	13	15	19	13	8	18	18	27	18	24	9	9	13	7	10	12	10	8	15	13	30	9	23
897.62	337.51	742.75	1057.8	775.61	222.23	1087.2	900.95	1119.8	925.97	1113.8	A0A178W8L4	Ribosomal_L6e_N domain-containing protein OS=Arabidopsis thaliana OX=3702 GN=AXX17_At1g68410 PE=3 SV=1	26107		99.2	224.17	34	18	23	18	18	21	13	24	24	14	21	24	10	3	11	12	10	15	18	8	18	15	14	13	16
897.62	337.51	742.75	1057.8	775.61	222.23	1087.2	900.95	1119.8	925.97	1113.8	Q9C9C5	60S ribosomal protein L6-3 OS=Arabidopsis thaliana OX=3702 GN=RPL6C PE=2 SV=1	26107		99.2	224.17	34	18	23	18	18	21	13	24	24	14	21	24	10	3	11	12	10	15	18	8	18	15	14	13	16
											Q8L942	Major latex protein putative OS=Arabidopsis thaliana OX=3702 PE=2 SV=1	17806	Oxidation (M); Acetylation (N-term)	99.1	169.62	30	30	15	15	25	20	15	25	25	25	25	25	4	0	16	9	15	13	10	11	16	14	15	18	13
											A0A178VCC1	Bet_v_1 domain-containing protein OS=Arabidopsis thaliana OX=3702 GN=AXX17_At3g28700 PE=4 SV=1	17806	Oxidation (M); Acetylation (N-term)	99.1	169.62	30	30	15	15	25	20	15	25	25	25	25	25	4	0	16	9	15	13	10	11	16	14	15	18	13
2221.8	1469.3	1557.5	2001.4	814.48	1063.5	2474.5	1306.2	3027.3	1126.2	2965.5	Q9LSV0	Glyoxylate/succinic semialdehyde reductase 1 OS=Arabidopsis thaliana OX=3702 GN=GLYR1 PE=1 SV=1	30692	Oxidation (M); Acetylation (N-term)	99.1	247.21	35	20	24	21	24	21	18	26	17	35	21	21	8	8	11	14	12	17	11	12	22	13	15	11	12
2221.8	1469.3	1557.5	2001.4	814.48	1063.5	2474.5	1306.2	3027.3	1126.2	2965.5	A0A654FAM1	Glyoxylate/succinic semialdehyde reductase 1-like OS=Arabidopsis thaliana OX=3702 GN=AN1_LOCUS14014 PE=4 SV=1	30678	Oxidation (M); Acetylation (N-term)	99.1	247.21	35	20	24	21	24	21	18	26	17	35	21	21	8	8	11	14	12	17	11	12	22	13	15	11	12
2221.8	1469.3	1557.5	2001.4	814.48	1063.5	2474.5	1306.2	3027.3	1126.2	2965.5	A0A178VK60	GR1 OS=Arabidopsis thaliana OX=3702 GN=AXX17_At3g27480 PE=4 SV=1	30692	Oxidation (M); Acetylation (N-term)	99.1	247.21	35	20	24	21	24	21	18	26	17	35	21	21	8	8	11	14	12	17	11	12	22	13	15	11	12
2179.5	1670.9	1961.5	2012.5	1270.8	771.53	2120.6	1727.6	1958.8	1847.9	2235.9	A0A654EL07	Photosynthetic NDH subunit of subcomplex B 2 chloroplastic OS=Arabidopsis thaliana OX=3702 GN=AN1_LOCUS5482 PE=4 SV=1	38006	Oxidation (M)	99.1	198.37	18	14	11	14	18	6	6	18	18	18	18	18	7	7	14	11	14	17	6	7	12	17	19	15	18
2179.5	1670.9	1961.5	2012.5	1270.8	771.53	2120.6	1727.6	1958.8	1847.9	2235.9	Q94AQ8	Photosynthetic NDH subunit of subcomplex B 2 chloroplastic OS=Arabidopsis thaliana OX=3702 GN=PNSB2 PE=1 SV=1	38006	Oxidation (M)	99.1	198.37	18	14	11	14	18	6	6	18	18	18	18	18	7	7	14	11	14	17	6	7	12	17	19	15	18
2179.5	1670.9	1961.5	2012.5	1270.8	771.53	2120.6	1727.6	1958.8	1847.9	2235.9	A0A178W1C7	PnsB2 OS=Arabidopsis thaliana OX=3702 GN=AXX17_At1g58360 PE=4 SV=1	38018	Oxidation (M)	99.1	198.37	18	14	11	14	18	6	6	18	18	18	18	18	7	7	14	11	14	17	6	7	12	17	19	15	18
210.33	0	191.46	388.52	40.826		51.087	261.42	43.68	220	267.04	A0A5S9WXC8	Aconitate hydratase OS=Arabidopsis thaliana OX=3702 GN=AT9943_LOCUS6427 PE=3 SV=1	108173	Oxidation (M)	99.2	245.38	9	7	5	6	8	4	3	6	8	8	8	7	7	3	16	6	17	20	9	3	16	15	16	15	17
210.33	0	191.46	388.52	40.826		51.087	261.42	43.68	220	267.04	A0A178VV24	Aconitate hydratase OS=Arabidopsis thaliana OX=3702 GN=AXX17_At2g04790 PE=3 SV=1	108201	Oxidation (M)	99.2	245.38	9	7	5	6	8	4	3	6	8	8	8	7	7	3	16	6	17	20	9	3	16	15	16	15	17
210.33	0	191.46	388.52	40.826		51.087	261.42	43.68	220	267.04	Q9SIB9	Aconitate hydratase 3 mitochondrial OS=Arabidopsis thaliana OX=3702 GN=ACO3 PE=1 SV=2	108201	Oxidation (M)	99.2	245.38	9	7	5	6	8	4	3	6	8	8	8	7	7	3	16	6	17	20	9	3	16	15	16	15	17
4156.1	3589.9	3739.8	3881.6	3524.1	2481.5	4762	3559.1	3922.1	6086.8	7345.9	A8MS83	Ribosomal protein L23AB OS=Arabidopsis thaliana OX=3702 GN=RPL23AB PE=1 SV=1	16744	Oxidation (M)	98.8	191.86	28	28	16	24	24	28	16	24	28	24	24	28	5	5	14	11	12	17	13	15	13	11	16	11	17
4156.1	3589.9	3739.8	3881.6	3524.1	2481.5	4762	3559.1	3922.1	6086.8	7345.9	A0A7G2ETZ8	(thale cress) hypothetical protein OS=Arabidopsis thaliana OX=3702 GN=AT9943_LOCUS13688 PE=3 SV=1	17397	Oxidation (M)	98.8	191.86	27	27	16	23	23	27	16	23	27	23	23	27	5	5	14	11	12	17	13	15	13	11	16	11	17
4156.1	3589.9	3739.8	3881.6	3524.1	2481.5	4762	3559.1	3922.1	6086.8	7345.9	A0A5S9XLS3	Ribosomal_L23eN domain-containing protein OS=Arabidopsis thaliana OX=3702 GN=AN1_LOCUS15901 PE=3 SV=1	17396	Oxidation (M)	98.8	191.86	27	27	16	23	23	27	16	23	27	23	23	27	5	5	14	11	12	17	13	15	13	11	16	11	17
4156.1	3589.9	3739.8	3881.6	3524.1	2481.5	4762	3559.1	3922.1	6086.8	7345.9	A0A178VSK4	(thale cress) hypothetical protein OS=Arabidopsis thaliana OX=3702 GN=AXX17_At2g36400 PE=3 SV=1	17441	Oxidation (M)	98.8	191.86	27	27	16	23	23	27	16	23	27	23	23	27	5	5	14	11	12	17	13	15	13	11	16	11	17
4156.1	3589.9	3739.8	3881.6	3524.1	2481.5	4762	3559.1	3922.1	6086.8	7345.9	Q8LD46	60S ribosomal protein L23a-1 OS=Arabidopsis thaliana OX=3702 GN=RPL23AA PE=2 SV=2	17441	Oxidation (M)	98.8	191.86	27	27	16	23	23	27	16	23	27	23	23	27	5	5	14	11	12	17	13	15	13	11	16	11	17
4156.1	3589.9	3739.8	3881.6	3524.1	2481.5	4762	3559.1	3922.1	6086.8	7345.9	Q9M3C3	60S ribosomal protein L23a-2 OS=Arabidopsis thaliana OX=3702 GN=RPL23AB PE=2 SV=1	17396	Oxidation (M)	98.8	191.86	27	27	16	23	23	27	16	23	27	23	23	27	5	5	14	11	12	17	13	15	13	11	16	11	17
4156.1	3589.9	3739.8	3881.6	3524.1	2481.5	4762	3559.1	3922.1	6086.8	7345.9	A0A178VJM6	RPL23AB OS=Arabidopsis thaliana OX=3702 GN=AXX17_At3g49870 PE=3 SV=1	17428	Oxidation (M)	98.8	191.86	27	27	16	23	23	27	16	23	27	23	23	27	5	5	14	11	12	17	13	15	13	11	16	11	17
2260.2	1907.3	1831.4	2005.1	2217.3	1951.8	2113.8	1981	2077.5	2350.5	2472.4	A0A7G2EHA4	GPI ethanolamine phosphate transferase 1 OS=Arabidopsis thaliana OX=3702 GN=AT9943_LOCUS9803 PE=3 SV=1	128149		99.1	222.48	4	3	3	3	2	3	2	3	3	4	3	3	5	5	11	9	15	11	13	12	13	11	21	14	20
2260.2	1907.3	1831.4	2005.1	2217.3	1951.8	2113.8	1981	2077.5	2350.5	2472.4	A0A178VL96	V-type proton ATPase subunit G OS=Arabidopsis thaliana OX=3702 GN=AXX17_At3g00480 PE=3 SV=1	12397		99	222.48	40	31	31	31	21	31	21	31	31	40	31	31	5	5	11	9	15	11	13	12	13	11	21	14	20
2260.2	1907.3	1831.4	2005.1	2217.3	1951.8	2113.8	1981	2077.5	2350.5	2472.4	O82628	V-type proton ATPase subunit G1 OS=Arabidopsis thaliana OX=3702 GN=VHA-G1 PE=1 SV=1	12397		99	222.48	40	31	31	31	21	31	21	31	31	40	31	31	5	5	11	9	15	11	13	12	13	11	21	14	20
1277.7	743.48	1612.6	2029.6	821.07	1805	1977.1	1819.8	2759.1	1955	2743.7	P37107	Signal recognition particle 54 kDa protein chloroplastic OS=Arabidopsis thaliana OX=3702 GN=FFC PE=1 SV=1	61232	Oxidation (M); Acetylation (N-term)	99.2	265.91	20	13	9	12	13	11	10	13	13	19	15	17	12	12	13	10	9	15	12	7	13	12	23	18	17
1277.7	743.48	1612.6	2029.6	821.07	1805	1977.1	1819.8	2759.1	1955	2743.7	A0A178UD49	SRP54CP OS=Arabidopsis thaliana OX=3702 GN=AXX17_At5g03290 PE=3 SV=1	61232	Oxidation (M); Acetylation (N-term)	99.2	265.91	20	13	9	12	13	11	10	13	13	19	15	17	12	12	13	10	9	15	12	7	13	12	23	18	17
3932	2960.9	3148.1	2932.4	2455.6	1961.1	4519.4	2846.3	1894	2975.8	3135.2	A0A384LF84	(thale cress) hypothetical protein OS=Arabidopsis thaliana OX=3702 GN=AXX17_At5g29330 PE=4 SV=1	42759	Carbamidomethylation	99.2	209.67	17	12	17	12	15	14	12	14	15	15	14	15	7	7	14	10	13	17	15	14	18	11	12	9	16
3932	2960.9	3148.1	2932.4	2455.6	1961.1	4519.4	2846.3	1894	2975.8	3135.2	Q93VR3	GDP-mannose 3 5-epimerase OS=Arabidopsis thaliana OX=3702 GN=At5g28840 PE=1 SV=1	42759	Carbamidomethylation	99.2	209.67	17	12	17	12	15	14	12	14	15	15	14	15	7	7	14	10	13	17	15	14	18	11	12	9	16
3932	2960.9	3148.1	2932.4	2455.6	1961.1	4519.4	2846.3	1894	2975.8	3135.2	Q0WWW3	GDP-mannose 3' 5'-epimerase OS=Arabidopsis thaliana OX=3702 GN=At5g28840 PE=2 SV=1	42759	Carbamidomethylation	99.2	209.67	17	12	17	12	15	14	12	14	15	15	14	15	7	7	14	10	13	17	15	14	18	11	12	9	16
1867.1	733.26	1271.2	1988.1	1090.2	249.06	1889.6	1735.9	1687.1	1976.3	2220.7	A0A178WJ05	(thale cress) hypothetical protein OS=Arabidopsis thaliana OX=3702 GN=AXX17_At1g62610 PE=3 SV=1	102395	Oxidation (M)	99.2	220.65	9	6	5	6	8	6	3	4	6	6	7	7	7	7	9	7	12	17	14	9	15	18	11	21	16
1867.1	733.26	1271.2	1988.1	1090.2	249.06	1889.6	1735.9	1687.1	1976.3	2220.7	Q9S7Y7	Alpha-xylosidase 1 OS=Arabidopsis thaliana OX=3702 GN=XYL1 PE=1 SV=1	102399	Oxidation (M)	99.2	220.65	9	6	5	6	8	6	3	4	6	6	7	7	7	7	9	7	12	17	14	9	15	18	11	21	16
1867.1	733.26	1271.2	1988.1	1090.2	249.06	1889.6	1735.9	1687.1	1976.3	2220.7	A0A0K2S4Q7	Alpha-xylosidase OS=Arabidopsis thaliana OX=3702 GN=TRG1 PE=3 SV=1	102395	Oxidation (M)	99.2	220.65	9	6	5	6	8	6	3	4	6	6	7	7	7	7	9	7	12	17	14	9	15	18	11	21	16
1606.2	1512	1242.8	1580.7	1289.6	1042.5	1703.7	2381.4	1683.9	2617.1	1621.6	A0A654ETF0	Mitochondrial-processing peptidase subunit alpha OS=Arabidopsis thaliana OX=3702 GN=AN1_LOCUS4311 PE=3 SV=1	54333	Oxidation (M)	99.2	242.92	25	13	12	11	20	11	7	18	20	23	18	25	11	11	13	11	9	17	12	8	11	15	18	15	20
1606.2	1512	1242.8	1580.7	1289.6	1042.5	1703.7	2381.4	1683.9	2617.1	1621.6	A0A178W8B9	(thale cress) hypothetical protein OS=Arabidopsis thaliana OX=3702 GN=AXX17_At1g46230 PE=3 SV=1	54402	Oxidation (M)	99.2	242.92	25	13	12	11	20	11	7	18	20	23	18	25	11	11	13	11	9	17	12	8	11	15	18	15	20
1606.2	1512	1242.8	1580.7	1289.6	1042.5	1703.7	2381.4	1683.9	2617.1	1621.6	Q9ZU25	Probable mitochondrial-processing peptidase subunit alpha-1 mitochondrial OS=Arabidopsis thaliana OX=3702 GN=MPPalpha1 PE=1 SV=1	54402	Oxidation (M)	99.2	242.92	25	13	12	11	20	11	7	18	20	23	18	25	11	11	13	11	9	17	12	8	11	15	18	15	20
											A0A5S9UUX1	Plasma membrane ATPase OS=Arabidopsis thaliana OX=3702 GN=C24_LOCUS1776 PE=3 SV=1	104686	Oxidation (M)	99.1	209.63	7	7	6	5	6	5	5	4	4	6	5	5	7	0	17	9	13	19	14	10	16	16	12	10	13
											A0A178W776	Plasma membrane ATPase OS=Arabidopsis thaliana OX=3702 GN=AXX17_At1g18090 PE=3 SV=1	104815	Oxidation (M)	99.1	209.63	7	7	6	5	6	5	5	4	4	6	5	5	7	0	17	9	13	19	14	10	16	16	12	10	13
											Q43128	ATPase 10 plasma membrane-type OS=Arabidopsis thaliana OX=3702 GN=AHA10 PE=2 SV=2	104815	Oxidation (M)	99.1	209.63	7	7	6	5	6	5	5	4	4	6	5	5	7	0	17	9	13	19	14	10	16	16	12	10	13
											A0A7G2DTV9	Plasma membrane ATPase OS=Arabidopsis thaliana OX=3702 GN=AT9943_LOCUS1488 PE=3 SV=1	105894	Oxidation (M)	99.1	209.63	7	7	6	5	6	5	5	4	4	6	5	5	7	0	17	9	13	19	14	10	16	16	12	10	13
782.08	263.23	373.69	833.98	223.76	154.41	598.14	673.08	878.42	656.58	1068.7	A0A7G2EMC9	Acetyltransferase component of pyruvate dehydrogenase complex OS=Arabidopsis thaliana OX=3702 GN=AT9943_LOCUS10970 PE=3 SV=1	51137		99.2	233.65	22	17	13	17	17	15	5	17	20	15	20	17	10	9	16	10	18	18	10	3	11	16	18	16	13
4888.6	5088.1	4647.1	768.08	992.25	721.82	6031.1	4987.1	1514.7	1411	1285.3	A0A654EUX5	RRM domain-containing protein OS=Arabidopsis thaliana OX=3702 GN=AN1_LOCUS8545 PE=4 SV=1	16890	Oxidation (M)	99.1	248.29	45	36	36	36	24	15	15	36	36	35	35	24	5	5	18	16	22	7	6	4	21	20	10	13	12
4888.6	5088.1	4647.1	768.08	992.25	721.82	6031.1	4987.1	1514.7	1411	1285.3	Q03250	Glycine-rich RNA-binding protein 7 OS=Arabidopsis thaliana OX=3702 GN=RBG7 PE=1 SV=1	16890	Oxidation (M)	99.1	248.29	45	36	36	36	24	15	15	36	36	35	35	24	5	5	18	16	22	7	6	4	21	20	10	13	12
2174.6	1752.6	2409.6	1238.5	1968.8	991.84	2864.2	2407.5	1923.8	1861	3206.5	F4JTH0	Aspartate aminotransferase OS=Arabidopsis thaliana OX=3702 GN=ASP5 PE=1 SV=1	49325	Carbamidomethylation; Oxidation (M)	99.2	241.82	23	13	15	18	16	12	9	19	17	19	17	15	10	9	13	15	13	12	12	9	17	17	13	13	14
2174.6	1752.6	2409.6	1238.5	1968.8	991.84	2864.2	2407.5	1923.8	1861	3206.5	P46248	Aspartate aminotransferase chloroplastic OS=Arabidopsis thaliana OX=3702 GN=ASP5 PE=1 SV=2	49831	Carbamidomethylation; Oxidation (M)	99.2	241.82	23	13	14	17	16	12	9	19	17	19	16	14	10	9	13	15	13	12	12	9	17	17	13	13	14
2174.6	1752.6	2409.6	1238.5	1968.8	991.84	2864.2	2407.5	1923.8	1861	3206.5	A0A384KDZ4	Aspartate aminotransferase OS=Arabidopsis thaliana OX=3702 GN=AXX17_At4g36660 PE=3 SV=1	49831	Carbamidomethylation; Oxidation (M)	99.2	241.82	23	13	14	17	16	12	9	19	17	19	16	14	10	9	13	15	13	12	12	9	17	17	13	13	14
2174.6	1752.6	2409.6	1238.5	1968.8	991.84	2864.2	2407.5	1923.8	1861	3206.5	B9DGA8	Aspartate aminotransferase OS=Arabidopsis thaliana OX=3702 GN=At4g31990 PE=2 SV=1	49831	Carbamidomethylation; Oxidation (M)	99.2	241.82	23	13	14	17	16	12	9	19	17	19	16	14	10	9	13	15	13	12	12	9	17	17	13	13	14
2174.6	1752.6	2409.6	1238.5	1968.8	991.84	2864.2	2407.5	1923.8	1861	3206.5	A0A7G2F2J8	Aspartate aminotransferase OS=Arabidopsis thaliana OX=3702 GN=AT9943_LOCUS17269 PE=3 SV=1	50906	Carbamidomethylation; Oxidation (M)	99.2	241.82	22	12	14	17	16	12	9	19	16	19	16	14	10	9	13	15	13	12	12	9	17	17	13	13	14
2174.6	1752.6	2409.6	1238.5	1968.8	991.84	2864.2	2407.5	1923.8	1861	3206.5	A0A654FUT0	Aspartate aminotransferase OS=Arabidopsis thaliana OX=3702 GN=AN1_LOCUS20011 PE=3 SV=1	50920	Carbamidomethylation; Oxidation (M)	99.2	241.82	22	12	14	17	16	12	9	19	16	19	16	14	10	9	13	15	13	12	12	9	17	17	13	13	14
2174.6	1752.6	2409.6	1238.5	1968.8	991.84	2864.2	2407.5	1923.8	1861	3206.5	B9DG21	Aspartate aminotransferase OS=Arabidopsis thaliana OX=3702 GN=ASP5 PE=1 SV=1	50975	Carbamidomethylation; Oxidation (M)	99.2	241.82	22	12	14	17	16	12	9	19	16	19	16	14	10	9	13	15	13	12	12	9	17	17	13	13	14
2174.6	1752.6	2409.6	1238.5	1968.8	991.84	2864.2	2407.5	1923.8	1861	3206.5	A0A5S9XXS5	Aspartate aminotransferase OS=Arabidopsis thaliana OX=3702 GN=C24_LOCUS19904 PE=3 SV=1	50974	Carbamidomethylation; Oxidation (M)	99.2	241.82	22	12	14	17	16	12	9	19	16	19	16	14	10	9	13	15	13	12	12	9	17	17	13	13	14
722.13	463.03	491.95	1004.7	292.28	0	1015.9	701.15	1035.3	1167.9	1286.3	P41916	GTP-binding nuclear protein Ran-1 OS=Arabidopsis thaliana OX=3702 GN=RAN1 PE=1 SV=1	25276	Acetylation (N-term)	98.4	151.83	16	16	16	16	16	16	16	16	16	16	16	16	3	1	13	11	15	16	16	10	14	11	14	15	13
722.13	463.03	491.95	1004.7	292.28	0	1015.9	701.15	1035.3	1167.9	1286.3	A0A178UD71	GTP-binding nuclear protein OS=Arabidopsis thaliana OX=3702 GN=AXX17_At5g54320 PE=3 SV=1	25079	Acetylation (N-term)	98.4	151.83	16	16	16	16	16	16	16	16	16	16	16	16	3	1	13	11	15	16	16	10	14	11	14	15	13
722.13	463.03	491.95	1004.7	292.28	0	1015.9	701.15	1035.3	1167.9	1286.3	A0A178UC18	GTP-binding nuclear protein OS=Arabidopsis thaliana OX=3702 GN=AXX17_At5g19960 PE=3 SV=1	25276	Acetylation (N-term)	98.4	151.83	16	16	16	16	16	16	16	16	16	16	16	16	3	1	13	11	15	16	16	10	14	11	14	15	13
722.13	463.03	491.95	1004.7	292.28	0	1015.9	701.15	1035.3	1167.9	1286.3	A0A178UQ77	GTP-binding nuclear protein OS=Arabidopsis thaliana OX=3702 GN=AXX17_At5g19970 PE=3 SV=1	25062	Acetylation (N-term)	98.4	151.83	16	16	16	16	16	16	16	16	16	16	16	16	3	1	13	11	15	16	16	10	14	11	14	15	13
722.13	463.03	491.95	1004.7	292.28	0	1015.9	701.15	1035.3	1167.9	1286.3	P41917	GTP-binding nuclear protein Ran-2 OS=Arabidopsis thaliana OX=3702 GN=RAN2 PE=1 SV=3	25062	Acetylation (N-term)	98.4	151.83	16	16	16	16	16	16	16	16	16	16	16	16	3	1	13	11	15	16	16	10	14	11	14	15	13
722.13	463.03	491.95	1004.7	292.28	0	1015.9	701.15	1035.3	1167.9	1286.3	Q8H156	GTP-binding nuclear protein Ran-3 OS=Arabidopsis thaliana OX=3702 GN=RAN3 PE=1 SV=2	25079	Acetylation (N-term)	98.4	151.83	16	16	16	16	16	16	16	16	16	16	16	16	3	1	13	11	15	16	16	10	14	11	14	15	13
722.13	463.03	491.95	1004.7	292.28	0	1015.9	701.15	1035.3	1167.9	1286.3	A0A654GBD5	GTP-binding nuclear protein OS=Arabidopsis thaliana OX=3702 GN=At5g55190 PE=3 SV=1	28704	Acetylation (N-term)	98.4	151.83	14	14	14	14	14	14	14	14	14	14	14	14	3	1	13	11	15	16	16	10	14	11	14	15	13
2654	1725.9	2117.3	2358.1	1877.8	1300.3	2373.8	1931.2	2047.4	2243.6	2542.5	A0A654FE46	4-coumarate--CoA ligase OS=Arabidopsis thaliana OX=3702 GN=AN1_LOCUS15244 PE=3 SV=1	55574	Carbamidomethylation; Oxidation (M); Acetylation (N-term)	99.2	226.81	17	17	11	11	14	14	10	14	12	17	13	14	7	7	13	13	11	16	17	15	12	11	12	9	17
2654	1725.9	2117.3	2358.1	1877.8	1300.3	2373.8	1931.2	2047.4	2243.6	2542.5	Q9SMT7	Oxalate--CoA ligase OS=Arabidopsis thaliana OX=3702 GN=AAE3 PE=1 SV=1	55544	Carbamidomethylation; Oxidation (M); Acetylation (N-term)	99.2	226.81	17	17	11	11	14	14	10	14	12	17	13	14	7	7	13	13	11	16	17	15	12	11	12	9	17
2654	1725.9	2117.3	2358.1	1877.8	1300.3	2373.8	1931.2	2047.4	2243.6	2542.5	A0A178V7A3	AAE3 OS=Arabidopsis thaliana OX=3702 GN=AXX17_At3g43140 PE=3 SV=1	55544	Carbamidomethylation; Oxidation (M); Acetylation (N-term)	99.2	226.81	17	17	11	11	14	14	10	14	12	17	13	14	7	7	13	13	11	16	17	15	12	11	12	9	17
2654	1725.9	2117.3	2358.1	1877.8	1300.3	2373.8	1931.2	2047.4	2243.6	2542.5	A0A7G2EVT8	(thale cress) hypothetical protein OS=Arabidopsis thaliana OX=3702 GN=AT9943_LOCUS13116 PE=3 SV=1	55718	Carbamidomethylation; Oxidation (M); Acetylation (N-term)	99.2	226.81	17	17	11	11	14	14	10	14	12	17	13	14	7	7	13	13	11	16	17	15	12	11	12	9	17
5275.6	4139.9	3860.3	4700.1	4315.4	2586.3	4170.2	4115.2	3642.9	4951.6	5530.1	F4IHB2	Glycine-rich protein 3 OS=Arabidopsis thaliana OX=3702 GN=GRP-3 PE=1 SV=1	11193	Carbamidomethylation	96.5	121.83	17	11	11	11	11	11	11	11	11	11	11	17	2	2	15	10	11	11	16	12	12	16	14	11	18
5275.6	4139.9	3860.3	4700.1	4315.4	2586.3	4170.2	4115.2	3642.9	4951.6	5530.1	Q9SL15	Glycine-rich protein 3 OS=Arabidopsis thaliana OX=3702 GN=GRP3 PE=1 SV=1	14289	Carbamidomethylation	96.5	121.83	13	8	8	8	8	8	8	8	8	8	8	13	2	2	15	10	11	11	16	12	12	16	14	11	18
5275.6	4139.9	3860.3	4700.1	4315.4	2586.3	4170.2	4115.2	3642.9	4951.6	5530.1	A0A178VS66	GRP3 OS=Arabidopsis thaliana OX=3702 GN=AXX17_At2g04610 PE=4 SV=1	14289	Carbamidomethylation	96.5	121.83	13	8	8	8	8	8	8	8	8	8	8	13	2	2	15	10	11	11	16	12	12	16	14	11	18
3504.6	1921	3080.8	3676.2	2802.9	1768.5	4179.1	3542.4	4727.4	3546.9	3607	A0A178UBS2	EMB3137 OS=Arabidopsis thaliana OX=3702 GN=AXX17_At5g13790 PE=3 SV=1	19097	Oxidation (M)	99	181.72	22	18	18	13	17	18	13	22	18	22	17	17	5	5	12	8	12	14	12	9	17	11	16	17	17
3504.6	1921	3080.8	3676.2	2802.9	1768.5	4179.1	3542.4	4727.4	3546.9	3607	P42732	30S ribosomal protein S13 chloroplastic OS=Arabidopsis thaliana OX=3702 GN=RPS13 PE=2 SV=1	19097	Oxidation (M)	99	181.72	22	18	18	13	17	18	13	22	18	22	17	17	5	5	12	8	12	14	12	9	17	11	16	17	17
4424	3019	3510.1	3706.5	3110.9	2656.6	3546.3	3435.8	4179.4	3829.5	4243.9	A0A178UU76	PGR5-LIKE A OS=Arabidopsis thaliana OX=3702 GN=AXX17_At4g26570 PE=4 SV=1	35721	Carbamidomethylation; Oxidation (M)	98.9	229.3	20	11	11	11	12	11	11	12	12	20	20	11	5	5	14	13	16	14	10	11	12	9	17	13	16
4424	3019	3510.1	3706.5	3110.9	2656.6	3546.3	3435.8	4179.4	3829.5	4243.9	Q8H112	PGR5-like protein 1A chloroplastic OS=Arabidopsis thaliana OX=3702 GN=PGRL1A PE=1 SV=1	35721	Carbamidomethylation; Oxidation (M)	98.9	229.3	20	11	11	11	12	11	11	12	12	20	20	11	5	5	14	13	16	14	10	11	12	9	17	13	16
3913.8	3182	4083.2	2845.5	3329.3	1638.6	4238.3	3527.4	3379.1	3735.6	5026.1	Q9FMU6	Mitochondrial phosphate carrier protein 3 mitochondrial OS=Arabidopsis thaliana OX=3702 GN=MPT3 PE=1 SV=1	40090	Carbamidomethylation; Oxidation (M)	99.2	191.87	22	15	15	13	15	17	10	15	15	15	15	17	9	9	16	10	17	16	11	8	18	13	10	11	14
3913.8	3182	4083.2	2845.5	3329.3	1638.6	4238.3	3527.4	3379.1	3735.6	5026.1	A0A178UMU4	(thale cress) hypothetical protein OS=Arabidopsis thaliana OX=3702 GN=AXX17_At5g13490 PE=3 SV=1	40090	Carbamidomethylation; Oxidation (M)	99.2	191.87	22	15	15	13	15	17	10	15	15	15	15	17	9	9	16	10	17	16	11	8	18	13	10	11	14
211.91	903.25	349.38	0		30.38	1306	216.11	0	0	65.785	Q43349	29 kDa ribonucleoprotein chloroplastic OS=Arabidopsis thaliana OX=3702 GN=CP29A PE=2 SV=2	36007		99.2	238.84	20	11	16	11	11	6	8	20	13	11	13	13	7	4	18	19	17	7	5	7	24	20	6	9	12
211.91	903.25	349.38	0		30.38	1306	216.11	0	0	65.785	A0A5S9XKG3	(thale cress) hypothetical protein OS=Arabidopsis thaliana OX=3702 GN=AN1_LOCUS15717 PE=4 SV=1	36007		99.2	238.84	20	11	16	11	11	6	8	20	13	11	13	13	7	4	18	19	17	7	5	7	24	20	6	9	12
211.91	903.25	349.38	0		30.38	1306	216.11	0	0	65.785	A0A178VFP8	CP29 OS=Arabidopsis thaliana OX=3702 GN=AXX17_At3g47850 PE=4 SV=1	36021		99.2	238.84	20	11	16	11	11	6	8	20	13	11	13	13	7	4	18	19	17	7	5	7	24	20	6	9	12
211.91	903.25	349.38	0		30.38	1306	216.11	0	0	65.785	F4JAF3	Chloroplast RNA-binding protein 29 OS=Arabidopsis thaliana OX=3702 GN=CP29 PE=1 SV=1	38403		99.2	238.84	18	10	15	10	10	5	7	18	12	10	12	12	7	4	18	19	17	7	5	7	24	20	6	9	12
1162.2	1556	1132.5	1161.9	1233.4	1301.7	1441.4	1176.5	1251.3	1549	1792.9	Q9FZ76	60S ribosomal protein L6-1 OS=Arabidopsis thaliana OX=3702 GN=RPL6A PE=2 SV=1	26153		99.2	198.89	30	13	20	17	21	20	17	27	21	17	24	24	8	3	8	10	12	12	18	13	15	11	15	14	15
1162.2	1556	1132.5	1161.9	1233.4	1301.7	1441.4	1176.5	1251.3	1549	1792.9	A0A7G2DX48	(thale cress) hypothetical protein OS=Arabidopsis thaliana OX=3702 GN=AT9943_LOCUS1602 PE=3 SV=1	25284		99.2	198.89	31	14	20	17	21	21	17	28	21	18	24	24	8	3	8	10	12	12	18	13	15	11	15	14	15
1162.2	1556	1132.5	1161.9	1233.4	1301.7	1441.4	1176.5	1251.3	1549	1792.9	A0A5S9V1W7	Ribosomal_L6e_N domain-containing protein OS=Arabidopsis thaliana OX=3702 GN=AN1_LOCUS1988 PE=3 SV=1	26149		99.2	198.89	30	13	20	17	21	20	17	27	21	17	24	24	8	3	8	10	12	12	18	13	15	11	15	14	15
1162.2	1556	1132.5	1161.9	1233.4	1301.7	1441.4	1176.5	1251.3	1549	1792.9	A0A178WM05	Ribosomal_L6e_N domain-containing protein OS=Arabidopsis thaliana OX=3702 GN=AXX17_At1g19460 PE=3 SV=1	26177		99.2	198.89	30	13	20	17	21	20	17	27	21	17	24	24	8	3	8	10	12	12	18	13	15	11	15	14	15
1162.2	1556	1132.5	1161.9	1233.4	1301.7	1441.4	1176.5	1251.3	1549	1792.9	Q8L9N4	60S ribosomal protein L6 putative OS=Arabidopsis thaliana OX=3702 PE=2 SV=1	26137		99.2	198.89	30	13	20	17	21	20	17	27	21	17	24	24	8	3	8	10	12	12	18	13	15	11	15	14	15
1399.7	755.25	1295.3	2013.8	384.36	168.58	1879.2	1098.9	1605	1391.1	2012.6	P51412	50S ribosomal protein L21 chloroplastic OS=Arabidopsis thaliana OX=3702 GN=RPL21 PE=2 SV=1	24038		98.4	184.52	13	13	10	13	13	13	10	10	10	10	10	13	4	4	13	12	12	10	12	14	16	12	15	15	12
1399.7	755.25	1295.3	2013.8	384.36	168.58	1879.2	1098.9	1605	1391.1	2012.6	A0A178WJ77	RPL21C OS=Arabidopsis thaliana OX=3702 GN=AXX17_At1g36490 PE=3 SV=1	24069		98.4	184.52	13	13	10	13	13	13	10	10	10	10	10	13	4	4	13	12	12	10	12	14	16	12	15	15	12
1399.7	755.25	1295.3	2013.8	384.36	168.58	1879.2	1098.9	1605	1391.1	2012.6	A0A5S9WIZ3	(thale cress) hypothetical protein OS=Arabidopsis thaliana OX=3702 GN=AT9943_LOCUS2987 PE=3 SV=1	24025		98.4	184.52	13	13	10	13	13	13	10	10	10	10	10	13	4	4	13	12	12	10	12	14	16	12	15	15	12
1399.7	755.25	1295.3	2013.8	384.36	168.58	1879.2	1098.9	1605	1391.1	2012.6	A0A654EKN6	50S ribosomal protein L21 chloroplastic OS=Arabidopsis thaliana OX=3702 GN=AN1_LOCUS3556 PE=3 SV=1	26708		98.4	184.52	12	12	9	12	12	12	9	9	9	9	9	12	4	4	13	12	12	10	12	14	16	12	15	15	12
2028	2256.5	1836.8	2491.2	2048.6	1283.5	2779	2083.2	2848.8	2395.1	3099.7	A0A178W8D1	(thale cress) hypothetical protein OS=Arabidopsis thaliana OX=3702 GN=AXX17_At1g33850 PE=3 SV=1	22018	Carbamidomethylation; Oxidation (M)	99	235.4	29	23	22	22	24	22	22	29	29	29	23	29	7	7	13	9	9	11	8	10	15	15	21	16	16
2028	2256.5	1836.8	2491.2	2048.6	1283.5	2779	2083.2	2848.8	2395.1	3099.7	P49209	60S ribosomal protein L9-1 OS=Arabidopsis thaliana OX=3702 GN=RPL9C PE=1 SV=3	22018	Carbamidomethylation; Oxidation (M)	99	235.4	29	23	22	22	24	22	22	29	29	29	23	29	7	7	13	9	9	11	8	10	15	15	21	16	16
2028	2256.5	1836.8	2491.2	2048.6	1283.5	2779	2083.2	2848.8	2395.1	3099.7	Q8LCC2	Ribosomal protein L9 putative OS=Arabidopsis thaliana OX=3702 PE=2 SV=1	22049	Carbamidomethylation; Oxidation (M)	99	235.4	29	23	22	22	24	22	22	29	29	29	23	29	7	7	13	9	9	11	8	10	15	15	21	16	16
1058	1191.6	1013.2	197.96	155.56	61.798	1702.2	611.72	268.71	249.94	293.5	P16127	Magnesium-chelatase subunit ChlI-1 chloroplastic OS=Arabidopsis thaliana OX=3702 GN=CHLI1 PE=1 SV=1	46270	Carbamidomethylation; Oxidation (M)	99.2	252.93	23	19	16	16	11	11	10	20	14	13	13	19	10	7	18	18	18	12	7	5	23	11	11	11	8
1058	1191.6	1013.2	197.96	155.56	61.798	1702.2	611.72	268.71	249.94	293.5	A0A178UXM0	Mg-protoporphyrin IX chelatase OS=Arabidopsis thaliana OX=3702 GN=AXX17_At4g21730 PE=3 SV=1	46270	Carbamidomethylation; Oxidation (M)	99.2	252.93	23	19	16	16	11	11	10	20	14	13	13	19	10	7	18	18	18	12	7	5	23	11	11	11	8
2155.1	2489	2683.9	2826.2	2195.3	1450.1	1971.4	3048.5	3270.7	3122.6	3564.3	A0A384KX64	V-type proton ATPase subunit C OS=Arabidopsis thaliana OX=3702 GN=AXX17_At1g13260 PE=3 SV=1	42619	Oxidation (M)	99.2	201.21	24	18	11	16	18	20	7	18	20	16	18	16	10	10	16	10	13	14	11	6	11	17	11	16	16
2155.1	2489	2683.9	2826.2	2195.3	1450.1	1971.4	3048.5	3270.7	3122.6	3564.3	Q9SDS7	V-type proton ATPase subunit C OS=Arabidopsis thaliana OX=3702 GN=VHA-C PE=1 SV=1	42619	Oxidation (M)	99.2	201.21	24	18	11	16	18	20	7	18	20	16	18	16	10	10	16	10	13	14	11	6	11	17	11	16	16
2155.1	2489	2683.9	2826.2	2195.3	1450.1	1971.4	3048.5	3270.7	3122.6	3564.3	C0SUV0	V-type proton ATPase subunit C (Fragment) OS=Arabidopsis thaliana OX=3702 GN=At1g12840 PE=2 SV=1	42619	Oxidation (M)	99.2	201.21	24	18	11	16	18	20	7	18	20	16	18	16	10	10	16	10	13	14	11	6	11	17	11	16	16
1815.5	1972.7	2047.7	2673.4	3401.4	2767.4	3757.7	2174	2721.3	2469.8	2004.1	P51427	40S ribosomal protein S5-2 OS=Arabidopsis thaliana OX=3702 GN=RPS5B PE=1 SV=2	22921	Carbamidomethylation; Acetylation (N-term)	99.1	205.31	27	22	22	22	22	26	26	26	22	22	26	22	7	7	14	12	11	9	13	15	16	12	11	14	14
1815.5	1972.7	2047.7	2673.4	3401.4	2767.4	3757.7	2174	2721.3	2469.8	2004.1	A0A178VED6	RPS5A OS=Arabidopsis thaliana OX=3702 GN=AXX17_At3g11890 PE=3 SV=1	22921	Carbamidomethylation; Acetylation (N-term)	99.1	205.31	27	22	22	22	22	26	26	26	22	22	26	22	7	7	14	12	11	9	13	15	16	12	11	14	14
7907.7	4282.8	7491.8	8019.7	6152.7	3041.7	7414.1	9441.3	10203	7736.8	9954.9	A0A1B1W4U4	ATP synthase epsilon chain chloroplastic OS=Arabidopsis thaliana OX=3702 GN=atpE PE=3 SV=1	14499	Carbamidomethylation; Acetylation (N-term)	99	195.64	40	34	23	29	40	29	29	34	40	34	40	40	5	5	16	9	9	15	8	10	13	12	20	15	14
7907.7	4282.8	7491.8	8019.7	6152.7	3041.7	7414.1	9441.3	10203	7736.8	9954.9	P09468	ATP synthase epsilon chain chloroplastic OS=Arabidopsis thaliana OX=3702 GN=atpE PE=1 SV=2	14499	Carbamidomethylation; Acetylation (N-term)	99	195.64	40	34	23	29	40	29	29	34	40	34	40	40	5	5	16	9	9	15	8	10	13	12	20	15	14
2806.6	1885.7	2579.3	2712.7	1740.4	1423.7	2445.3	2115.5	2878.1	2934.1	2728.6	A0A178VGN1	Cysteine synthase OS=Arabidopsis thaliana OX=3702 GN=AXX17_At3g55720 PE=3 SV=1	39927	Carbamidomethylation; Oxidation (M)	99.2	210.02	21	15	10	14	17	13	12	13	13	15	15	13	7	7	14	9	11	12	15	14	16	10	13	11	15
2806.6	1885.7	2579.3	2712.7	1740.4	1423.7	2445.3	2115.5	2878.1	2934.1	2728.6	Q9S757	Bifunctional L-3-cyanoalanine synthase/cysteine synthase C1 mitochondrial OS=Arabidopsis thaliana OX=3702 GN=CYSC1 PE=1 SV=1	39927	Carbamidomethylation; Oxidation (M)	99.2	210.02	21	15	10	14	17	13	12	13	13	15	15	13	7	7	14	9	11	12	15	14	16	10	13	11	15
2806.6	1885.7	2579.3	2712.7	1740.4	1423.7	2445.3	2115.5	2878.1	2934.1	2728.6	A0A5S9XPI6	Cysteine synthase OS=Arabidopsis thaliana OX=3702 GN=C24_LOCUS16398 PE=3 SV=1	39904	Carbamidomethylation; Oxidation (M)	99.2	210.02	21	15	10	14	17	13	12	13	13	15	15	13	7	7	14	9	11	12	15	14	16	10	13	11	15
52.543	51.99	26.586	32.863		0	51.377	46.448	18.312	16.755	93.003	A0A178UM28	ATP citrate synthase OS=Arabidopsis thaliana OX=3702 GN=AXX17_At5g48220 PE=4 SV=1	65828	Carbamidomethylation; Oxidation (M); Acetylation (N-term)	99.2	286.99	21	17	11	12	16	8	9	13	15	17	15	17	11	2	18	8	12	13	6	6	16	15	14	12	20
52.543	51.99	26.586	32.863		0	51.377	46.448	18.312	16.755	93.003	Q9FGX1	ATP-citrate synthase beta chain protein 2 OS=Arabidopsis thaliana OX=3702 GN=ACLB-2 PE=1 SV=1	65828	Carbamidomethylation; Oxidation (M); Acetylation (N-term)	99.2	286.99	21	17	11	12	16	8	9	13	15	17	15	17	11	2	18	8	12	13	6	6	16	15	14	12	20
854.75	515.31	544.3	2569.1	992.22	1255.7	1121.5	284.23	320.29	2501	2797.8	F4HST2	Dehydrin family protein OS=Arabidopsis thaliana OX=3702 GN=ERD10 PE=1 SV=1	29443	Oxidation (M); Acetylation (N-term)	99.1	229.17	26	20	11	10	26	16	20	20	11	16	20	20	8	8	8	4	2	27	11	15	8	3	15	20	27
854.75	515.31	544.3	2569.1	992.22	1255.7	1121.5	284.23	320.29	2501	2797.8	P42759	Dehydrin ERD10 OS=Arabidopsis thaliana OX=3702 GN=ERD10 PE=1 SV=1	29548	Oxidation (M); Acetylation (N-term)	99.1	229.17	26	20	11	10	26	16	20	20	11	16	20	20	8	8	8	4	2	27	11	15	8	3	15	20	27
2197.3	1799.3	1197.1	2658.4	1383.7	416.51	3105.2	1942.5	3165	2544.5	2167.9	P49690	60S ribosomal protein L23 OS=Arabidopsis thaliana OX=3702 GN=RPL23C PE=2 SV=3	15027	Carbamidomethylation; Oxidation (M)	99.1	238.57	46	41	46	41	46	35	30	46	41	41	41	46	6	6	10	10	10	15	9	10	16	9	19	14	18
2197.3	1799.3	1197.1	2658.4	1383.7	416.51	3105.2	1942.5	3165	2544.5	2167.9	A0A178VEM4	At2g33370 OS=Arabidopsis thaliana OX=3702 PE=2 SV=1	15027	Carbamidomethylation; Oxidation (M)	99.1	238.57	46	41	46	41	46	35	30	46	41	41	41	46	6	6	10	10	10	15	9	10	16	9	19	14	18
2197.3	1799.3	1197.1	2658.4	1383.7	416.51	3105.2	1942.5	3165	2544.5	2167.9	A0A384L7B8	(thale cress) hypothetical protein OS=Arabidopsis thaliana OX=3702 GN=AXX17_At1g03760 PE=3 SV=1	15027	Carbamidomethylation; Oxidation (M)	99.1	238.57	46	41	46	41	46	35	30	46	41	41	41	46	6	6	10	10	10	15	9	10	16	9	19	14	18
2197.3	1799.3	1197.1	2658.4	1383.7	416.51	3105.2	1942.5	3165	2544.5	2167.9	O22686	F19P19.5 protein OS=Arabidopsis thaliana OX=3702 GN=F19P19.5 PE=3 SV=1	16998	Carbamidomethylation; Oxidation (M)	99.1	238.57	41	36	41	36	41	31	27	41	36	36	36	41	6	6	10	10	10	15	9	10	16	9	19	14	18
2197.3	1799.3	1197.1	2658.4	1383.7	416.51	3105.2	1942.5	3165	2544.5	2167.9	F4J3P1	Ribosomal protein L14p/L23e family protein OS=Arabidopsis thaliana OX=3702 GN=emb2171 PE=1 SV=1	13406	Carbamidomethylation; Oxidation (M)	99	238.57	52	46	52	46	52	39	34	52	46	46	46	52	6	6	10	10	10	15	9	10	16	9	19	14	18
4068.9	3497.1	3667.5	4086.4	3420.1	2734.7	2673.9	3624.4	4257.9	3196.8	4543.9	A0A5S9XX37	threonine synthase OS=Arabidopsis thaliana OX=3702 GN=AN1_LOCUS19776 PE=3 SV=1	57777	Oxidation (M)	99.1	181.86	12	8	8	8	10	8	8	6	10	12	10	10	6	6	12	14	12	16	12	9	9	10	17	15	14
4068.9	3497.1	3667.5	4086.4	3420.1	2734.7	2673.9	3624.4	4257.9	3196.8	4543.9	Q9S7B5	Threonine synthase 1 chloroplastic OS=Arabidopsis thaliana OX=3702 GN=TS1 PE=1 SV=1	57777	Oxidation (M)	99.1	181.86	12	8	8	8	10	8	8	6	10	12	10	10	6	6	12	14	12	16	12	9	9	10	17	15	14
4068.9	3497.1	3667.5	4086.4	3420.1	2734.7	2673.9	3624.4	4257.9	3196.8	4543.9	A0A178V4G4	threonine synthase OS=Arabidopsis thaliana OX=3702 GN=AXX17_At4g34230 PE=3 SV=1	57763	Oxidation (M)	99.1	181.86	12	8	8	8	10	8	8	6	10	12	10	10	6	6	12	14	12	16	12	9	9	10	17	15	14
3881	2814	3314.1	3203.5	1894.3	1892.5	3868.3	3037.5	3677.8	3622	4141.7	Q9ZQ80	Nodulin-related protein 1 OS=Arabidopsis thaliana OX=3702 GN=NRP1 PE=1 SV=1	19701	Oxidation (M); Acetylation (N-term)	99.1	170.49	23	23	23	23	23	23	23	23	23	23	23	23	4	4	13	12	14	12	10	11	12	10	11	15	20
3881	2814	3314.1	3203.5	1894.3	1892.5	3868.3	3037.5	3677.8	3622	4141.7	A0A5S9WWT5	Uncharacterized protein OS=Arabidopsis thaliana OX=3702 GN=C24_LOCUS7264 PE=4 SV=1	19793	Oxidation (M); Acetylation (N-term)	99.1	170.49	23	23	23	23	23	23	23	23	23	23	23	23	4	4	13	12	14	12	10	11	12	10	11	15	20
3881	2814	3314.1	3203.5	1894.3	1892.5	3868.3	3037.5	3677.8	3622	4141.7	A0A7G2EB57	(thale cress) hypothetical protein OS=Arabidopsis thaliana OX=3702 GN=AT9943_LOCUS6269 PE=4 SV=1	20548	Oxidation (M); Acetylation (N-term)	99.1	170.49	22	22	22	22	22	22	22	22	22	22	22	22	4	4	13	12	14	12	10	11	12	10	11	15	20
3881	2814	3314.1	3203.5	1894.3	1892.5	3868.3	3037.5	3677.8	3622	4141.7	A0A178VZB6	NRP1 OS=Arabidopsis thaliana OX=3702 GN=AXX17_At2g02430 PE=4 SV=1	19687	Oxidation (M); Acetylation (N-term)	99	170.49	23	23	23	23	23	23	23	23	23	23	23	23	4	4	13	12	14	12	10	11	12	10	11	15	20
1503.5	1988.5	1211	2291.6	2094.7	1817.9	1815.4	1820.8	2371.6	2439.1	2239.7	A0A5S9WUT8	Thioredoxin domain-containing protein OS=Arabidopsis thaliana OX=3702 GN=AN1_LOCUS6645 PE=4 SV=1	33743	Oxidation (M)	99.1	182.33	17	11	13	13	13	13	10	13	13	17	13	10	6	6	10	13	7	16	13	11	16	10	12	19	13
1503.5	1988.5	1211	2291.6	2094.7	1817.9	1815.4	1820.8	2371.6	2439.1	2239.7	A0A178WHK1	CDSP32 OS=Arabidopsis thaliana OX=3702 GN=AXX17_At1g70530 PE=4 SV=1	33685	Oxidation (M)	99.1	182.33	17	11	13	13	13	13	10	13	13	17	13	10	6	6	10	13	7	16	13	11	16	10	12	19	13
1503.5	1988.5	1211	2291.6	2094.7	1817.9	1815.4	1820.8	2371.6	2439.1	2239.7	Q9SGS4	Thioredoxin-like protein CDSP32 chloroplastic OS=Arabidopsis thaliana OX=3702 GN=CDSP32 PE=1 SV=1	33685	Oxidation (M)	99.1	182.33	17	11	13	13	13	13	10	13	13	17	13	10	6	6	10	13	7	16	13	11	16	10	12	19	13
10194	9298.8	9347	9331.5	7810.5	7132.8	9676.2	9103	9484.4	9826.6	10702	A0A384KZL8	OEP6 OS=Arabidopsis thaliana OX=3702 GN=AXX17_At3g57440 PE=1 SV=1	7256		96.5	118.16	23	23	13	13	23	13	13	23	23	23	23	23	2	2	14	12	15	12	12	12	12	14	10	16	11
10194	9298.8	9347	9331.5	7810.5	7132.8	9676.2	9103	9484.4	9826.6	10702	Q9M1X3	AT3g63160/F16M2_10 OS=Arabidopsis thaliana OX=3702 GN=F16M2_10 PE=1 SV=1	7256		96.5	118.16	23	23	13	13	23	13	13	23	23	23	23	23	2	2	14	12	15	12	12	12	12	14	10	16	11
2538.3	1335.1	722.46	1608.2	1785.8	751.38	1373	1027.8	2028.6	1596.3	1394.5	A0A7G2F4B5	V-type proton ATPase subunit a OS=Arabidopsis thaliana OX=3702 GN=AT9943_LOCUS17903 PE=3 SV=1	90882	Carbamidomethylation; Oxidation (M)	99.2	257.65	16	9	7	7	7	8	7	9	11	16	7	7	11	6	17	12	12	11	11	13	11	12	16	12	12
2538.3	1335.1	722.46	1608.2	1785.8	751.38	1373	1027.8	2028.6	1596.3	1394.5	A0A178V3A8	V-type proton ATPase subunit a OS=Arabidopsis thaliana OX=3702 GN=AXX17_At4g44440 PE=3 SV=1	92833	Carbamidomethylation; Oxidation (M)	99.2	257.65	15	9	7	7	7	8	7	9	10	15	7	7	11	6	17	12	12	11	11	13	11	12	16	12	12
2538.3	1335.1	722.46	1608.2	1785.8	751.38	1373	1027.8	2028.6	1596.3	1394.5	Q8W4S4	V-type proton ATPase subunit a3 OS=Arabidopsis thaliana OX=3702 GN=VHA-a3 PE=1 SV=1	92833	Carbamidomethylation; Oxidation (M)	99.2	257.65	15	9	7	7	7	8	7	9	10	15	7	7	11	6	17	12	12	11	11	13	11	12	16	12	12
2538.3	1335.1	722.46	1608.2	1785.8	751.38	1373	1027.8	2028.6	1596.3	1394.5	A0A654FXD2	V-type proton ATPase subunit a OS=Arabidopsis thaliana OX=3702 GN=AN1_LOCUS20771 PE=3 SV=1	92819	Carbamidomethylation; Oxidation (M)	99.2	257.65	15	9	7	7	7	8	7	9	10	15	7	7	11	6	17	12	12	11	11	13	11	12	16	12	12
2538.3	1335.1	722.46	1608.2	1785.8	751.38	1373	1027.8	2028.6	1596.3	1394.5	A0A5S9XZZ4	V-type proton ATPase subunit a OS=Arabidopsis thaliana OX=3702 GN=C24_LOCUS20668 PE=3 SV=1	92847	Carbamidomethylation; Oxidation (M)	99.2	257.65	15	9	7	7	7	8	7	9	10	15	7	7	11	6	17	12	12	11	11	13	11	12	16	12	12
411.61	544.47	601.39	705.78	727.5	547.62	883.98	693.19	700.98	764.4	423.18	F4I472	Cytosolic ribosomal protein S15 OS=Arabidopsis thaliana OX=3702 GN=RPS15 PE=1 SV=1	17058	Acetylation (N-term)	98.6	144.7	17	17	17	17	17	17	17	17	17	17	17	17	2	1	13	15	15	12	13	12	17	10	8	13	10
411.61	544.47	601.39	705.78	727.5	547.62	883.98	693.19	700.98	764.4	423.18	A0A178WE09	(thale cress) hypothetical protein OS=Arabidopsis thaliana OX=3702 GN=AXX17_At1g03560 PE=3 SV=1	17129	Acetylation (N-term)	98.6	144.7	17	17	17	17	17	17	17	17	17	17	17	17	2	1	13	15	15	12	13	12	17	10	8	13	10
411.61	544.47	601.39	705.78	727.5	547.62	883.98	693.19	700.98	764.4	423.18	Q08112	40S ribosomal protein S15-1 OS=Arabidopsis thaliana OX=3702 GN=RPS15A PE=2 SV=1	17129	Acetylation (N-term)	98.6	144.7	17	17	17	17	17	17	17	17	17	17	17	17	2	1	13	15	15	12	13	12	17	10	8	13	10
411.61	544.47	601.39	705.78	727.5	547.62	883.98	693.19	700.98	764.4	423.18	B0FV99	At1g04270 (Fragment) OS=Arabidopsis thaliana OX=3702 PE=3 SV=1	16069	Acetylation (N-term)	98.2	144.7	18	18	18	18	18	18	18	18	18	18	18	18	2	1	13	15	15	12	13	12	17	10	8	13	10
304.92	378.47	322.86	337.59	339.5	263.78	290.28	261.13	259.19	0	400.56	Q6ICZ8	Nascent polypeptide-associated complex subunit alpha-like protein 3 OS=Arabidopsis thaliana OX=3702 GN=At5g13850 PE=1 SV=1	22057	Oxidation (M); Acetylation (N-term)	99.1	223.23	33	33	12	18	33	18	5	33	33	33	33	33	5	2	14	7	11	16	10	3	19	14	16	13	15
304.92	378.47	322.86	337.59	339.5	263.78	290.28	261.13	259.19	0	400.56	A0A654G0U4	NAC-A/B domain-containing protein OS=Arabidopsis thaliana OX=3702 GN=AN1_LOCUS22152 PE=4 SV=1	22057	Oxidation (M); Acetylation (N-term)	99.1	223.23	33	33	12	18	33	18	5	33	33	33	33	33	5	2	14	7	11	16	10	3	19	14	16	13	15
772.3	303.31	565.23	459.05	465.34	357.48	896.77	1127.8	891.08	847.07	1563.1	Q9LIB2	Alpha-glucan phosphorylase 1 OS=Arabidopsis thaliana OX=3702 GN=PHS1 PE=1 SV=1	108585	Oxidation (M)	99.2	180.53	10	7	6	6	5	6	2	6	7	9	5	6	9	8	13	10	11	10	10	6	17	14	16	16	13
772.3	303.31	565.23	459.05	465.34	357.48	896.77	1127.8	891.08	847.07	1563.1	W8PUS4	Alpha-1 4 glucan phosphorylase (Fragment) OS=Arabidopsis thaliana OX=3702 GN=AT3G29320 PE=2 SV=1	108585	Oxidation (M)	99.2	180.53	10	7	6	6	5	6	2	6	7	9	5	6	9	8	13	10	11	10	10	6	17	14	16	16	13
772.3	303.31	565.23	459.05	465.34	357.48	896.77	1127.8	891.08	847.07	1563.1	A0A178V8I8	Alpha-1 4 glucan phosphorylase OS=Arabidopsis thaliana OX=3702 GN=AXX17_At3g32230 PE=3 SV=1	108568	Oxidation (M)	99.2	180.53	10	7	6	6	5	6	2	6	7	9	5	6	9	8	13	10	11	10	10	6	17	14	16	16	13
772.3	303.31	565.23	459.05	465.34	357.48	896.77	1127.8	891.08	847.07	1563.1	A0A654FGW8	Alpha-1 4 glucan phosphorylase OS=Arabidopsis thaliana OX=3702 GN=AN1_LOCUS14454 PE=3 SV=1	108585	Oxidation (M)	99.2	180.53	10	7	6	6	5	6	2	6	7	9	5	6	9	8	13	10	11	10	10	6	17	14	16	16	13
1404.7	428.2	600.16	1555	1160.3	1933.5	1761.2	1503	2250.1	1172.6	3318.2	A0A178VN28	(thale cress) hypothetical protein OS=Arabidopsis thaliana OX=3702 GN=AXX17_At2g16600 PE=3 SV=1	33346		99.1	234.01	26	22	22	18	22	22	18	22	26	22	22	21	7	7	12	9	8	14	10	6	14	21	15	14	13
1404.7	428.2	600.16	1555	1160.3	1933.5	1761.2	1503	2250.1	1172.6	3318.2	Q9SKP6	Triosephosphate isomerase chloroplastic OS=Arabidopsis thaliana OX=3702 GN=TIM PE=1 SV=1	33346		99.1	234.01	26	22	22	18	22	22	18	22	26	22	22	21	7	7	12	9	8	14	10	6	14	21	15	14	13
1404.7	428.2	600.16	1555	1160.3	1933.5	1761.2	1503	2250.1	1172.6	3318.2	A8MRE8	Triosephosphate isomerase OS=Arabidopsis thaliana OX=3702 GN=TIM PE=1 SV=1	32307		99.1	234.01	27	22	22	19	22	22	18	22	26	22	22	22	7	7	12	9	8	14	10	6	14	21	15	14	13
4704.4	3812.4	4788.8	3951.9	3811	2578.1	4692.7	4835	5394.3	4461.8	5538.2	O22773	Thylakoid lumenal 16.5 kDa protein chloroplastic OS=Arabidopsis thaliana OX=3702 GN=At4g02530 PE=1 SV=3	23663		98.9	200.9	20	17	20	17	17	20	20	17	17	17	17	20	4	4	11	12	16	13	13	11	15	11	12	10	12
4704.4	3812.4	4788.8	3951.9	3811	2578.1	4692.7	4835	5394.3	4461.8	5538.2	A0A1P8B5G9	Chloroplast thylakoid lumen protein OS=Arabidopsis thaliana OX=3702 GN=At4g02530 PE=1 SV=1	28025		98.9	200.9	18	14	18	14	14	18	18	14	14	14	14	18	4	4	11	12	16	13	13	11	15	11	12	10	12
4704.4	3812.4	4788.8	3951.9	3811	2578.1	4692.7	4835	5394.3	4461.8	5538.2	A0A1P8B5H3	Chloroplast thylakoid lumen protein OS=Arabidopsis thaliana OX=3702 GN=At4g02530 PE=1 SV=1	29713		98.9	200.9	17	14	17	14	14	17	17	14	14	14	14	17	4	4	11	12	16	13	13	11	15	11	12	10	12
2383.5	2188.7	2635.9	2816	2263.3	1563.2	3324.3	2568.2	2893	2859.3	3229.6	A0A7G2EI06	40S ribosomal protein S26 OS=Arabidopsis thaliana OX=3702 GN=AT9943_LOCUS9051 PE=3 SV=1	13236		96	149.57	20	20	20	20	20	20	20	20	20	20	20	20	2	2	14	11	11	10	11	9	10	13	17	14	16
2383.5	2188.7	2635.9	2816	2263.3	1563.2	3324.3	2568.2	2893	2859.3	3229.6	A0A7G2EH38	40S ribosomal protein S26 OS=Arabidopsis thaliana OX=3702 GN=AT9943_LOCUS9058 PE=3 SV=1	13876		96	149.57	20	20	20	20	20	20	20	20	20	20	20	20	2	2	14	11	11	10	11	9	10	13	17	14	16
2383.5	2188.7	2635.9	2816	2263.3	1563.2	3324.3	2568.2	2893	2859.3	3229.6	Q9LYK9	40S ribosomal protein S26-3 OS=Arabidopsis thaliana OX=3702 GN=RPS26C PE=2 SV=1	14628		96	149.57	18	18	18	18	18	18	18	18	18	18	18	18	2	2	14	11	11	10	11	9	10	13	17	14	16
2383.5	2188.7	2635.9	2816	2263.3	1563.2	3324.3	2568.2	2893	2859.3	3229.6	A0A178VFW7	40S ribosomal protein S26 OS=Arabidopsis thaliana OX=3702 GN=AXX17_At3g50970 PE=3 SV=1	14628		96	149.57	18	18	18	18	18	18	18	18	18	18	18	18	2	2	14	11	11	10	11	9	10	13	17	14	16
2383.5	2188.7	2635.9	2816	2263.3	1563.2	3324.3	2568.2	2893	2859.3	3229.6	P49206	40S ribosomal protein S26-1 OS=Arabidopsis thaliana OX=3702 GN=RPS26A PE=2 SV=2	14729		96	149.57	18	18	18	18	18	18	18	18	18	18	18	18	2	2	14	11	11	10	11	9	10	13	17	14	16
2383.5	2188.7	2635.9	2816	2263.3	1563.2	3324.3	2568.2	2893	2859.3	3229.6	A0A178VPZ6	40S ribosomal protein S26 OS=Arabidopsis thaliana OX=3702 GN=AXX17_At2g37700 PE=3 SV=1	14729		96	149.57	18	18	18	18	18	18	18	18	18	18	18	18	2	2	14	11	11	10	11	9	10	13	17	14	16
2383.5	2188.7	2635.9	2816	2263.3	1563.2	3324.3	2568.2	2893	2859.3	3229.6	Q8LPJ7	40S ribosomal protein S26-2 OS=Arabidopsis thaliana OX=3702 GN=RPS26B PE=2 SV=2	14841		96	149.57	18	18	18	18	18	18	18	18	18	18	18	18	2	2	14	11	11	10	11	9	10	13	17	14	16
2383.5	2188.7	2635.9	2816	2263.3	1563.2	3324.3	2568.2	2893	2859.3	3229.6	A0A178VTX1	40S ribosomal protein S26 OS=Arabidopsis thaliana OX=3702 GN=AXX17_At2g37620 PE=3 SV=1	14841		96	149.57	18	18	18	18	18	18	18	18	18	18	18	18	2	2	14	11	11	10	11	9	10	13	17	14	16
2383.5	2188.7	2635.9	2816	2263.3	1563.2	3324.3	2568.2	2893	2859.3	3229.6	A0A5S9XN14	40S ribosomal protein S26 OS=Arabidopsis thaliana OX=3702 GN=At3g56340 PE=3 SV=1	15576		96	149.57	17	17	17	17	17	17	17	17	17	17	17	17	2	2	14	11	11	10	11	9	10	13	17	14	16
2383.5	2188.7	2635.9	2816	2263.3	1563.2	3324.3	2568.2	2893	2859.3	3229.6	A0A654F0N4	40S ribosomal protein S26 OS=Arabidopsis thaliana OX=3702 GN=AN1_LOCUS10539 PE=3 SV=1	16653		96	149.57	16	16	16	16	16	16	16	16	16	16	16	16	2	2	14	11	11	10	11	9	10	13	17	14	16
2565.7	1158.5	2153.4	2919.8	2327.1	854.92	2373	2141.7	3164.3	2061.2	2338.1	A0A514YJ86	30S ribosomal protein S12 chloroplastic OS=Arabidopsis thaliana OX=3702 GN=rps12 PE=3 SV=1	13764		98.4	153.47	21	21	21	15	21	21	21	15	21	21	15	21	4	4	16	12	10	16	11	7	14	11	18	9	11
2565.7	1158.5	2153.4	2919.8	2327.1	854.92	2373	2141.7	3164.3	2061.2	2338.1	P62126	30S ribosomal protein S12 chloroplastic OS=Arabidopsis thaliana OX=3702 GN=rps12-B PE=2 SV=2	13764		98.4	153.47	21	21	21	15	21	21	21	15	21	21	15	21	4	4	16	12	10	16	11	7	14	11	18	9	11
2565.7	1158.5	2153.4	2919.8	2327.1	854.92	2373	2141.7	3164.3	2061.2	2338.1	A0A8F5V8P7	30S ribosomal protein S12 chloroplastic OS=Arabidopsis thaliana OX=3702 GN=rps12 PE=3 SV=1	13738		98.4	153.47	21	21	21	15	21	21	21	15	21	21	15	21	4	4	16	12	10	16	11	7	14	11	18	9	11
368.58	0	113.2	196.95	198.66	51.204	117.47	123.96	296.04	346.34	396.06	A0A654EW13	Coatomer subunit alpha OS=Arabidopsis thaliana OX=3702 GN=AN1_LOCUS8516 PE=4 SV=1	136467	Oxidation (M)	99.2	253.81	10	6	7	7	5	6	2	6	5	4	6	7	11	5	14	11	14	11	13	3	16	11	11	13	17
368.58	0	113.2	196.95	198.66	51.204	117.47	123.96	296.04	346.34	396.06	Q9SJT9	Coatomer subunit alpha-2 OS=Arabidopsis thaliana OX=3702 GN=At2g21390 PE=2 SV=1	136467	Oxidation (M)	99.2	253.81	10	6	7	7	5	6	2	6	5	4	6	7	11	5	14	11	14	11	13	3	16	11	11	13	17
368.58	0	113.2	196.95	198.66	51.204	117.47	123.96	296.04	346.34	396.06	A0A178VW28	Coatomer subunit alpha OS=Arabidopsis thaliana OX=3702 GN=AXX17_At2g16870 PE=4 SV=1	136501	Oxidation (M)	99.2	253.81	10	6	7	7	5	6	2	6	5	4	6	7	11	5	14	11	14	11	13	3	16	11	11	13	17
1679.6	2051.3	2965.8	2976.5	3429.5	2044.4	3715.6	3460.8	3518.4	3409.2	4216.9	Q8L934	Nucleoid DNA-binding-like protein OS=Arabidopsis thaliana OX=3702 PE=2 SV=1	45490	Carbamidomethylation; Oxidation (M)	99.1	189.17	18	13	13	13	16	18	14	13	16	13	18	15	8	8	13	9	13	11	13	8	10	14	13	16	14
1679.6	2051.3	2965.8	2976.5	3429.5	2044.4	3715.6	3460.8	3518.4	3409.2	4216.9	A0A654FH34	(thale cress) hypothetical protein OS=Arabidopsis thaliana OX=3702 GN=AN1_LOCUS15811 PE=3 SV=1	45490	Carbamidomethylation; Oxidation (M)	99.1	189.17	18	13	13	13	16	18	14	13	16	13	18	15	8	8	13	9	13	11	13	8	10	14	13	16	14
1679.6	2051.3	2965.8	2976.5	3429.5	2044.4	3715.6	3460.8	3518.4	3409.2	4216.9	A0A384KZH7	Peptidase A1 domain-containing protein OS=Arabidopsis thaliana OX=3702 GN=At3g54400 PE=3 SV=1	45475	Carbamidomethylation; Oxidation (M)	99.1	189.17	18	13	13	13	16	18	14	13	16	13	18	15	8	8	13	9	13	11	13	8	10	14	13	16	14
1679.6	2051.3	2965.8	2976.5	3429.5	2044.4	3715.6	3460.8	3518.4	3409.2	4216.9	Q9M2U7	AT3g54400/T12E18_90 OS=Arabidopsis thaliana OX=3702 GN=T12E18_90 PE=1 SV=1	45475	Carbamidomethylation; Oxidation (M)	99.1	189.17	18	13	13	13	16	18	14	13	16	13	18	15	8	8	13	9	13	11	13	8	10	14	13	16	14
759.63	471.73	595.23	570.12	732.16	195.29	791.89	910.25	750.87	759.78	1073.2	A0A7G2F449	N-acyl-aliphatic-L-amino acid amidohydrolase OS=Arabidopsis thaliana OX=3702 GN=AT9943_LOCUS17832 PE=3 SV=1	60464	Oxidation (M)	99.2	219.37	17	17	9	12	15	12	7	14	16	15	16	17	8	8	20	7	16	11	12	5	11	15	12	11	14
759.63	471.73	595.23	570.12	732.16	195.29	791.89	910.25	750.87	759.78	1073.2	A0A654FX23	N-acyl-aliphatic-L-amino acid amidohydrolase OS=Arabidopsis thaliana OX=3702 GN=At4g38220 PE=3 SV=1	48038	Oxidation (M)	99.2	219.37	22	22	12	16	19	16	8	18	20	19	20	22	8	8	20	7	16	11	12	5	11	15	12	11	14
759.63	471.73	595.23	570.12	732.16	195.29	791.89	910.25	750.87	759.78	1073.2	F4JTK8	N-acyl-aliphatic-L-amino acid amidohydrolase OS=Arabidopsis thaliana OX=3702 GN=AQI PE=1 SV=1	48038	Oxidation (M)	99.2	219.37	22	22	12	16	19	16	8	18	20	19	20	22	8	8	20	7	16	11	12	5	11	15	12	11	14
759.63	471.73	595.23	570.12	732.16	195.29	791.89	910.25	750.87	759.78	1073.2	A0A5S9XZR0	N-acyl-aliphatic-L-amino acid amidohydrolase OS=Arabidopsis thaliana OX=3702 GN=At4g38220 PE=3 SV=1	47739	Oxidation (M)	99.2	219.37	22	22	12	16	20	16	8	18	20	19	20	22	8	8	20	7	16	11	12	5	11	15	12	11	14
759.63	471.73	595.23	570.12	732.16	195.29	791.89	910.25	750.87	759.78	1073.2	Q8S9L3	N-acyl-aliphatic-L-amino acid amidohydrolase OS=Arabidopsis thaliana OX=3702 GN=AQI PE=1 SV=1	47739	Oxidation (M)	99.2	219.37	22	22	12	16	20	16	8	18	20	19	20	22	8	8	20	7	16	11	12	5	11	15	12	11	14
759.63	471.73	595.23	570.12	732.16	195.29	791.89	910.25	750.87	759.78	1073.2	Q9SZM2	N-acyl-aliphatic-L-amino acid amidohydrolase OS=Arabidopsis thaliana OX=3702 GN=F20D10.340 PE=3 SV=1	83438	Oxidation (M)	99.2	219.37	12	12	7	9	11	9	5	10	11	11	11	12	8	8	20	7	16	11	12	5	11	15	12	11	14
759.63	471.73	595.23	570.12	732.16	195.29	791.89	910.25	750.87	759.78	1073.2	C0Z224	N-acyl-aliphatic-L-amino acid amidohydrolase OS=Arabidopsis thaliana OX=3702 GN=At4g38220 PE=2 SV=1	44367	Oxidation (M)	99.2	219.37	24	24	12	17	21	17	9	20	22	20	22	24	8	8	20	7	16	11	12	5	11	15	12	11	14
2819.3	1792.5	1999.7	3034.1	2205.1	2135	2371.6	2147.6	3267.7	3777.2	4051.4	P42763	Dehydrin ERD14 OS=Arabidopsis thaliana OX=3702 GN=ERD14 PE=1 SV=1	20786	Acetylation (N-term)	97.8	165.33	15	15	15	15	15	15	15	15	15	15	15	15	3	3	11	6	10	12	9	15	9	11	17	18	16
2819.3	1792.5	1999.7	3034.1	2205.1	2135	2371.6	2147.6	3267.7	3777.2	4051.4	A0A178WC69	ERD14 OS=Arabidopsis thaliana OX=3702 GN=AXX17_At1g70630 PE=3 SV=1	20786	Acetylation (N-term)	97.8	165.33	15	15	15	15	15	15	15	15	15	15	15	15	3	3	11	6	10	12	9	15	9	11	17	18	16
288.24	806.21	1108.8	209.26	1235.5	465.17	400.27	294.28	286.23	338.95	395.54	A0A7G2ELV2	(thale cress) hypothetical protein OS=Arabidopsis thaliana OX=3702 GN=AT9943_LOCUS10808 PE=4 SV=1	23774	Oxidation (M); Acetylation (N-term)	99.1	226.19	37	24	16	21	32	21	10	24	32	32	24	32	6	3	12	9	9	17	11	4	17	12	19	13	11
288.24	806.21	1108.8	209.26	1235.5	465.17	400.27	294.28	286.23	338.95	395.54	Q9LHG9	Nascent polypeptide-associated complex subunit alpha-like protein 1 OS=Arabidopsis thaliana OX=3702 GN=At3g12390 PE=1 SV=1	21982	Oxidation (M); Acetylation (N-term)	99.1	226.19	40	26	17	23	34	23	10	26	34	34	26	34	6	3	12	9	9	17	11	4	17	12	19	13	11
288.24	806.21	1108.8	209.26	1235.5	465.17	400.27	294.28	286.23	338.95	395.54	A0A178VJD9	NAC-A/B domain-containing protein OS=Arabidopsis thaliana OX=3702 GN=AXX17_At3g12410 PE=4 SV=1	21982	Oxidation (M); Acetylation (N-term)	99.1	226.19	40	26	17	23	34	23	10	26	34	34	26	34	6	3	12	9	9	17	11	4	17	12	19	13	11
			1101	36.132	33.112			0	266.21	444.84	Q9LNW0	17.8 kDa class I heat shock protein OS=Arabidopsis thaliana OX=3702 GN=HSP17.8 PE=1 SV=1	17828	Oxidation (M); Acetylation (N-term)	99.2	242.15	50	0	0	0	50	29	36	0	0	44	29	50	8	4	0	0	0	35	12	20	0	0	17	16	33
			1101	36.132	33.112			0	266.21	444.84	A0A178WJ08	(thale cress) hypothetical protein OS=Arabidopsis thaliana OX=3702 GN=AXX17_At1g07030 PE=3 SV=1	17828	Oxidation (M); Acetylation (N-term)	99.2	242.15	50	0	0	0	50	29	36	0	0	44	29	50	8	4	0	0	0	35	12	20	0	0	17	16	33
4839	5373.2	3385.1	6117.4	6090.8	4874.5	6228.2	3790.9	5149.5	4974.9	7667.7	A0A178VL71	(thale cress) hypothetical protein OS=Arabidopsis thaliana OX=3702 GN=AXX17_At2g43060 PE=3 SV=1	43061		99.1	193.44	17	15	10	11	10	10	10	12	10	15	13	15	9	9	14	11	11	11	9	9	12	12	12	15	17
4839	5373.2	3385.1	6117.4	6090.8	4874.5	6228.2	3790.9	5149.5	4974.9	7667.7	O22126	Fasciclin-like arabinogalactan protein 8 OS=Arabidopsis thaliana OX=3702 GN=FLA8 PE=2 SV=1	43075		99.1	193.44	17	15	10	11	10	10	10	12	10	15	13	15	9	9	14	11	11	11	9	9	12	12	12	15	17
878.71	1753.6	818.25	1884.1	1869	999.47	1222	1647.3	3113.8	2301.6	1161.1	O82299	Putative chloroplast RNA binding protein OS=Arabidopsis thaliana OX=3702 GN=At2g35410 PE=1 SV=1	33786	Oxidation (M)	99.1	207.49	22	15	10	10	18	15	7	22	12	15	19	15	6	6	13	8	10	14	14	9	13	8	15	13	15
878.71	1753.6	818.25	1884.1	1869	999.47	1222	1647.3	3113.8	2301.6	1161.1	A0A178W0G5	33 kDa ribonucleoprotein chloroplastic OS=Arabidopsis thaliana OX=3702 GN=AXX17_At2g31980 PE=1 SV=1	33786	Oxidation (M)	99.1	207.49	22	15	10	10	18	15	7	22	12	15	19	15	6	6	13	8	10	14	14	9	13	8	15	13	15
275.99	51.672	123.85	25235	175.38	0	109.02	169.32	74.535	284.68	351.7	P46645	Aspartate aminotransferase cytoplasmic isozyme 1 OS=Arabidopsis thaliana OX=3702 GN=ASP2 PE=1 SV=2	44267	Carbamidomethylation; Oxidation (M); Acetylation (N-term)	99.2	252.73	25	14	11	11	19	14	2	13	17	20	22	18	9	6	13	7	8	14	10	5	6	19	15	22	13
275.99	51.672	123.85	25235	175.38	0	109.02	169.32	74.535	284.68	351.7	Q1EBW2	Aspartate aminotransferase OS=Arabidopsis thaliana OX=3702 PE=2 SV=1	44267	Carbamidomethylation; Oxidation (M); Acetylation (N-term)	99.2	252.73	25	14	11	11	19	14	2	13	17	20	22	18	9	6	13	7	8	14	10	5	6	19	15	22	13
275.99	51.672	123.85	25235	175.38	0	109.02	169.32	74.535	284.68	351.7	A0A384KI72	Aspartate aminotransferase OS=Arabidopsis thaliana OX=3702 GN=AXX17_At5g19470 PE=3 SV=1	44267	Carbamidomethylation; Oxidation (M); Acetylation (N-term)	99.2	252.73	25	14	11	11	19	14	2	13	17	20	22	18	9	6	13	7	8	14	10	5	6	19	15	22	13
2048.7	1039	920.58	954.76	588.72	260.08	1947	2391.8	1063.8	1144.9	1209.8	A0A7G2DWH0	(thale cress) hypothetical protein OS=Arabidopsis thaliana OX=3702 GN=AT9943_LOCUS2478 PE=3 SV=1	41470	Carbamidomethylation; Oxidation (M)	99.1	253.25	25	21	10	21	21	7	5	25	25	18	18	18	7	7	14	8	12	9	7	3	25	25	9	10	10
2048.7	1039	920.58	954.76	588.72	260.08	1947	2391.8	1063.8	1144.9	1209.8	A0A178WMD1	GDSL esterase/lipase At1g29670-like OS=Arabidopsis thaliana OX=3702 GN=AXX17_At1g30030 PE=3 SV=1	39872	Carbamidomethylation; Oxidation (M)	99.1	253.25	26	22	10	22	22	7	5	26	26	19	19	18	7	7	14	8	12	9	7	3	25	25	9	10	10
2048.7	1039	920.58	954.76	588.72	260.08	1947	2391.8	1063.8	1144.9	1209.8	Q9C7N4	GDSL esterase/lipase At1g29670 OS=Arabidopsis thaliana OX=3702 GN=At1g29670 PE=2 SV=1	39872	Carbamidomethylation; Oxidation (M)	99.1	253.25	26	22	10	22	22	7	5	26	26	19	19	18	7	7	14	8	12	9	7	3	25	25	9	10	10
2048.7	1039	920.58	954.76	588.72	260.08	1947	2391.8	1063.8	1144.9	1209.8	A0A1P8ASL8	GDSL-like Lipase/Acylhydrolase superfamily protein OS=Arabidopsis thaliana OX=3702 GN=At1g29670 PE=1 SV=1	47730	Carbamidomethylation; Oxidation (M)	99.1	253.25	22	19	8	19	19	6	4	22	22	16	16	15	7	7	14	8	12	9	7	3	25	25	9	10	10
1506.7	589.74	857.59	1479.3	976.31	172.5	1001.1	900.41	2015.4	1523.1	1505	A0A178V2S8	Peptidyl-prolyl cis-trans isomerase OS=Arabidopsis thaliana OX=3702 GN=AXX17_At4g44070 PE=3 SV=1	18373	Carbamidomethylation; Oxidation (M)	99	188.98	32	27	15	15	20	15	15	15	27	27	27	27	5	3	11	11	8	13	12	9	12	8	17	15	15
1506.7	589.74	857.59	1479.3	976.31	172.5	1001.1	900.41	2015.4	1523.1	1505	P34790	Peptidyl-prolyl cis-trans isomerase CYP18-3 OS=Arabidopsis thaliana OX=3702 GN=CYP18-3 PE=1 SV=1	18373	Carbamidomethylation; Oxidation (M)	99	188.98	32	27	15	15	20	15	15	15	27	27	27	27	5	3	11	11	8	13	12	9	12	8	17	15	15
1558.9	1297.1	1337.4	1951.7	2177.1	1509.9	1951.6	1338.2	2056.8	1912.8	2497.1	A0A5S9Y595	Rubredoxin-like domain-containing protein OS=Arabidopsis thaliana OX=3702 GN=AN1_LOCUS22495 PE=4 SV=1	28479	Carbamidomethylation	99	190.31	16	13	16	13	16	16	16	16	13	16	16	16	3	3	10	12	10	14	10	9	12	10	15	15	14
1558.9	1297.1	1337.4	1951.7	2177.1	1509.9	1951.6	1338.2	2056.8	1912.8	2497.1	Q9FFJ2	Rubredoxin family protein OS=Arabidopsis thaliana OX=3702 GN=ENH1 PE=1 SV=1	28459	Carbamidomethylation	98.9	190.31	16	13	16	13	16	16	16	16	13	16	16	16	3	3	10	12	10	14	10	9	12	10	15	15	14
273.8	245.67	227.14	0	0	110.54	355.39	247.76	292.61	298.5	326.77	Q9FY64	40S ribosomal protein S15-4 OS=Arabidopsis thaliana OX=3702 GN=RPS15D PE=2 SV=1	17072	Acetylation (N-term)	98.6	139.27	17	17	17	17	17	17	17	17	17	17	17	17	2	1	16	12	11	10	12	11	16	12	9	12	10
1222.1	597.18	929.53	724.41	798.27	494.84	1330.3	725.26	1629.4	1162.2	1059.8	A0A178UB21	oligopeptidase A OS=Arabidopsis thaliana OX=3702 GN=At5g65620 PE=3 SV=1	80204	Oxidation (M)	99.2	257.52	18	10	8	8	9	7	5	10	7	14	7	11	12	8	15	9	14	11	12	7	15	11	13	8	15
1222.1	597.18	929.53	724.41	798.27	494.84	1330.3	725.26	1629.4	1162.2	1059.8	Q94AM1	Organellar oligopeptidase A chloroplastic/mitochondrial OS=Arabidopsis thaliana OX=3702 GN=OOP PE=1 SV=1	88757	Oxidation (M)	99.2	257.52	16	9	7	7	8	6	4	9	6	13	6	10	12	8	15	9	14	11	12	7	15	11	13	8	15
1222.1	597.18	929.53	724.41	798.27	494.84	1330.3	725.26	1629.4	1162.2	1059.8	A0A5S9YJE1	oligopeptidase A OS=Arabidopsis thaliana OX=3702 GN=C24_LOCUS26715 PE=3 SV=1	89519	Oxidation (M)	99.2	257.52	16	9	7	7	8	6	4	9	6	13	6	10	12	8	15	9	14	11	12	7	15	11	13	8	15
1222.1	597.18	929.53	724.41	798.27	494.84	1330.3	725.26	1629.4	1162.2	1059.8	A0A654GEE4	oligopeptidase A OS=Arabidopsis thaliana OX=3702 GN=AN1_LOCUS26890 PE=3 SV=1	89570	Oxidation (M)	99.2	257.52	16	9	7	7	8	6	4	9	6	13	6	10	12	8	15	9	14	11	12	7	15	11	13	8	15
1222.1	597.18	929.53	724.41	798.27	494.84	1330.3	725.26	1629.4	1162.2	1059.8	A0A1R7T3A4	oligopeptidase A OS=Arabidopsis thaliana OX=3702 GN=OOP PE=1 SV=1	90369	Oxidation (M)	99.2	257.52	16	8	7	7	8	6	4	8	6	12	6	10	12	8	15	9	14	11	12	7	15	11	13	8	15
1310.1	905.35	1022.5	992.06	798.15	459.2	1427.6	1083	1600.5	1345.9	1161.2	Q9LW85	MAR-binding filament-like protein 1 OS=Arabidopsis thaliana OX=3702 GN=MFP1 PE=2 SV=2	81973	Oxidation (M)	99.2	239.2	15	10	10	10	10	9	4	10	9	10	11	12	10	10	13	10	10	10	14	7	14	11	13	16	12
1310.1	905.35	1022.5	992.06	798.15	459.2	1427.6	1083	1600.5	1345.9	1161.2	A0A654F9A6	MAR-binding filament-like protein 1-1 OS=Arabidopsis thaliana OX=3702 GN=AN1_LOCUS12984 PE=4 SV=1	81973	Oxidation (M)	99.2	239.2	15	10	10	10	10	9	4	10	9	10	11	12	10	10	13	10	10	10	14	7	14	11	13	16	12
1986.3	1587.1	1576.7	2084.8	1590	1128.6	2047.4	1904.2	1831.3	2291	916.38	Q9SMX3	Mitochondrial outer membrane protein porin 3 OS=Arabidopsis thaliana OX=3702 GN=VDAC3 PE=1 SV=3	29211		99.1	222.44	28	17	12	17	17	16	12	28	20	25	19	17	8	4	11	8	10	17	12	8	15	11	13	16	9
2499.1	1614	1720	1890.3	1767.5	961.46	2168.1	1786.7	2282.1	2125.6	1722.6	A0A178UIA9	Malic enzyme OS=Arabidopsis thaliana OX=3702 GN=AXX17_At5g11400 PE=3 SV=1	64413	Oxidation (M)	99.1	212.51	12	7	7	7	9	7	7	9	7	12	9	7	6	6	11	14	16	11	11	5	10	13	16	13	10
2499.1	1614	1720	1890.3	1767.5	961.46	2168.1	1786.7	2282.1	2125.6	1722.6	Q9LYG3	NADP-dependent malic enzyme 2 OS=Arabidopsis thaliana OX=3702 GN=NADP-ME2 PE=1 SV=1	64413	Oxidation (M)	99.1	212.51	12	7	7	7	9	7	7	9	7	12	9	7	6	6	11	14	16	11	11	5	10	13	16	13	10
1100.8	746.3	827.63	415.11	725.04	504.81	1228.4	254.98	1112.6	1049.3	1313.6	A0A178W6W4	Alanine--tRNA ligase OS=Arabidopsis thaliana OX=3702 GN=At1g50200 PE=3 SV=1	105172	Carbamidomethylation; Oxidation (M)	99.2	233.84	13	7	8	8	8	7	6	10	7	9	7	9	11	11	11	10	12	14	8	9	13	9	12	11	20
1100.8	746.3	827.63	415.11	725.04	504.81	1228.4	254.98	1112.6	1049.3	1313.6	A0A7G2E2X7	Alanine--tRNA ligase OS=Arabidopsis thaliana OX=3702 GN=AT9943_LOCUS3506 PE=3 SV=1	107968	Carbamidomethylation; Oxidation (M)	99.2	233.84	12	7	8	7	8	6	6	10	7	9	6	9	11	11	11	10	12	14	8	9	13	9	12	11	20
1100.8	746.3	827.63	415.11	725.04	504.81	1228.4	254.98	1112.6	1049.3	1313.6	P36428	Alanine--tRNA ligase OS=Arabidopsis thaliana OX=3702 GN=ALATS PE=1 SV=3	110489	Carbamidomethylation; Oxidation (M)	99.2	233.84	12	7	7	7	7	6	5	10	7	9	6	9	11	11	11	10	12	14	8	9	13	9	12	11	20
1100.8	746.3	827.63	415.11	725.04	504.81	1228.4	254.98	1112.6	1049.3	1313.6	A0A5S9WNF0	Alanine--tRNA ligase OS=Arabidopsis thaliana OX=3702 GN=C24_LOCUS4018 PE=3 SV=1	110519	Carbamidomethylation; Oxidation (M)	99.2	233.84	12	7	7	7	7	6	5	10	7	9	6	9	11	11	11	10	12	14	8	9	13	9	12	11	20
1100.8	746.3	827.63	415.11	725.04	504.81	1228.4	254.98	1112.6	1049.3	1313.6	A0A654EHS4	Alanine--tRNA ligase OS=Arabidopsis thaliana OX=3702 GN=AN1_LOCUS4135 PE=3 SV=1	110475	Carbamidomethylation; Oxidation (M)	99.2	233.84	12	7	7	7	7	6	5	10	7	9	6	9	11	11	11	10	12	14	8	9	13	9	12	11	20
2345.6	2013.5	1577.9	1340.8	1405.2	1425.7	1640.8	1584.9	1664.3	1878.7	2531.8	Q93XM7	Mitochondrial carnitine/acylcarnitine carrier-like protein OS=Arabidopsis thaliana OX=3702 GN=BOU PE=1 SV=1	31023	Oxidation (M)	99.2	256.44	31	28	18	21	25	24	11	20	25	25	28	25	9	9	15	8	8	11	13	10	9	11	15	15	14
2345.6	2013.5	1577.9	1340.8	1405.2	1425.7	1640.8	1584.9	1664.3	1878.7	2531.8	A0A5S9YBY9	(thale cress) hypothetical protein OS=Arabidopsis thaliana OX=3702 GN=AT9943_LOCUS21480 PE=3 SV=1	31023	Oxidation (M)	99.2	256.44	31	28	18	21	25	24	11	20	25	25	28	25	9	9	15	8	8	11	13	10	9	11	15	15	14
1328.6	2384.1	2265.8	2914.6	1882.9	867.31	2640.5	1882.4	3312.7	2698	3226.1	F4HU93	L-ascorbate peroxidase OS=Arabidopsis thaliana OX=3702 GN=APX1 PE=1 SV=1	27520	Carbamidomethylation; Oxidation (M)	99.1	182.93	20	13	16	12	16	16	12	16	12	20	13	13	6	6	10	15	10	11	13	8	11	6	20	14	11
1328.6	2384.1	2265.8	2914.6	1882.9	867.31	2640.5	1882.4	3312.7	2698	3226.1	Q05431	L-ascorbate peroxidase 1 cytosolic OS=Arabidopsis thaliana OX=3702 GN=APX1 PE=1 SV=2	27561	Carbamidomethylation; Oxidation (M)	99.1	182.93	20	13	16	12	16	16	12	16	12	20	13	13	6	6	10	15	10	11	13	8	11	6	20	14	11
1328.6	2384.1	2265.8	2914.6	1882.9	867.31	2640.5	1882.4	3312.7	2698	3226.1	A0A178W5I1	L-ascorbate peroxidase OS=Arabidopsis thaliana OX=3702 GN=AXX17_At1g07590 PE=3 SV=1	27561	Carbamidomethylation; Oxidation (M)	99.1	182.93	20	13	16	12	16	16	12	16	12	20	13	13	6	6	10	15	10	11	13	8	11	6	20	14	11
0											A0A8F5Z9Q2	ATP synthase subunit b chloroplastic OS=Arabidopsis thaliana OX=3702 GN=atpF PE=3 SV=1	20824		84.4	132.12	11	11	6	6	6	6	6	6	6	6	6	6	3	1	15	10	8	13	14	10	10	11	13	12	13
1255.9	537.84	1015.6	969.64	596.68	465.85	1278.6	1202.2	1290.9	1114.2	1724.7	Q8LCW6	Similar to late embryogenesis abundant proteins OS=Arabidopsis thaliana OX=3702 GN=At2g44060 PE=2 SV=1	35907	Carbamidomethylation; Oxidation (M); Acetylation (N-term)	99.2	211.77	23	21	13	21	12	17	8	23	19	23	21	23	7	7	12	8	12	12	9	5	14	11	15	15	16
1255.9	537.84	1015.6	969.64	596.68	465.85	1278.6	1202.2	1290.9	1114.2	1724.7	O80576	At2g44060 OS=Arabidopsis thaliana OX=3702 GN=late embryogenesis abundant 26 PE=1 SV=1	36036	Carbamidomethylation; Oxidation (M); Acetylation (N-term)	99.2	211.77	23	21	13	21	12	17	8	23	19	23	21	23	7	7	12	8	12	12	9	5	14	11	15	15	16
1255.9	537.84	1015.6	969.64	596.68	465.85	1278.6	1202.2	1290.9	1114.2	1724.7	A0A178VUS5	Late embryogenesis abundant protein LEA-14 OS=Arabidopsis thaliana OX=3702 GN=AXX17_At2g41600 PE=3 SV=1	36036	Carbamidomethylation; Oxidation (M); Acetylation (N-term)	99.2	211.77	23	21	13	21	12	17	8	23	19	23	21	23	7	7	12	8	12	12	9	5	14	11	15	15	16
1255.9	537.84	1015.6	969.64	596.68	465.85	1278.6	1202.2	1290.9	1114.2	1724.7	A0A7G2EKA0	(thale cress) hypothetical protein OS=Arabidopsis thaliana OX=3702 GN=AT9943_LOCUS9383 PE=3 SV=1	37296	Carbamidomethylation; Oxidation (M); Acetylation (N-term)	99.2	211.77	23	20	12	20	12	16	7	23	18	23	20	23	7	7	12	8	12	12	9	5	14	11	15	15	16
1364.1	2393.5	544.56	831.48	418.83	42.504	788.09	804.69	1491	1068.4	894.54	A0A178WLJ9	PMEAMT OS=Arabidopsis thaliana OX=3702 GN=AXX17_At1g42710 PE=4 SV=1	56046	Carbamidomethylation; Oxidation (M)	99.2	241.33	22	16	14	12	15	10	6	13	15	21	14	17	10	10	15	8	13	9	8	6	14	12	20	8	15
1364.1	2393.5	544.56	831.48	418.83	42.504	788.09	804.69	1491	1068.4	894.54	A0A5S9WMS2	Methyltransf_11 domain-containing protein OS=Arabidopsis thaliana OX=3702 GN=C24_LOCUS3859 PE=4 SV=1	56064	Carbamidomethylation; Oxidation (M)	99.2	241.33	22	16	14	12	15	10	6	13	15	21	14	17	10	10	15	8	13	9	8	6	14	12	20	8	15
1364.1	2393.5	544.56	831.48	418.83	42.504	788.09	804.69	1491	1068.4	894.54	Q944H0	Phosphomethylethanolamine N-methyltransferase OS=Arabidopsis thaliana OX=3702 GN=NMT2 PE=1 SV=2	56046	Carbamidomethylation; Oxidation (M)	99.2	241.33	22	16	14	12	15	10	6	13	15	21	14	17	10	10	15	8	13	9	8	6	14	12	20	8	15
1364.1	2393.5	544.56	831.48	418.83	42.504	788.09	804.69	1491	1068.4	894.54	A0A178WLU9	PMEAMT OS=Arabidopsis thaliana OX=3702 GN=At1g48600 PE=4 SV=1	54018	Carbamidomethylation; Oxidation (M)	99.2	241.33	23	16	14	13	16	10	6	13	15	21	15	17	10	10	15	8	13	9	8	6	14	12	20	8	15
1364.1	2393.5	544.56	831.48	418.83	42.504	788.09	804.69	1491	1068.4	894.54	A0A178WLK2	PMEAMT OS=Arabidopsis thaliana OX=3702 GN=AXX17_At1g42710 PE=4 SV=1	59245	Carbamidomethylation; Oxidation (M)	99.2	241.33	21	15	13	12	14	9	6	12	14	19	13	16	10	10	15	8	13	9	8	6	14	12	20	8	15
1364.1	2393.5	544.56	831.48	418.83	42.504	788.09	804.69	1491	1068.4	894.54	A0A7G2DZS5	(thale cress) hypothetical protein OS=Arabidopsis thaliana OX=3702 GN=AT9943_LOCUS3371 PE=4 SV=1	54963	Carbamidomethylation; Oxidation (M)	99.2	241.33	23	16	14	13	15	10	6	13	15	21	14	17	10	10	15	8	13	9	8	6	14	12	20	8	15
2225	1855.3	1805.3	1800.9	1618.2	1473.2	2033	1671.8	2073.1	2274.3	2689.1	Q9ZUX4	Uncharacterized protein At2g27730 mitochondrial OS=Arabidopsis thaliana OX=3702 GN=At2g27730 PE=1 SV=1	11948		98.9	195.09	34	34	34	34	34	34	34	34	34	34	34	34	3	3	11	13	10	11	7	7	15	12	15	13	14
2225	1855.3	1805.3	1800.9	1618.2	1473.2	2033	1671.8	2073.1	2274.3	2689.1	A0A5S9X1Y3	Copper ion binding OS=Arabidopsis thaliana OX=3702 GN=AN1_LOCUS9172 PE=4 SV=1	11962		98.8	195.09	34	34	34	34	34	34	34	34	34	34	34	34	3	3	11	13	10	11	7	7	15	12	15	13	14
2731.6	2816.8	2945.8	2440.4	2384.6	1711.2	4139.8	2142.3	3087.9	2119.4	3411.2	A0A654FPS4	Dihydrolipoyl dehydrogenase OS=Arabidopsis thaliana OX=3702 GN=AN1_LOCUS18301 PE=3 SV=1	60108	Carbamidomethylation	99.2	257.34	18	9	9	9	9	9	9	13	9	16	9	11	8	8	9	12	11	16	10	9	14	7	17	10	13
2731.6	2816.8	2945.8	2440.4	2384.6	1711.2	4139.8	2142.3	3087.9	2119.4	3411.2	F4JLP5	Dihydrolipoyl dehydrogenase 2 chloroplastic OS=Arabidopsis thaliana OX=3702 GN=LPD2 PE=2 SV=2	60145	Carbamidomethylation	99.2	257.34	18	9	9	9	9	9	9	13	9	16	9	11	8	8	9	12	11	16	10	9	14	7	17	10	13
2731.6	2816.8	2945.8	2440.4	2384.6	1711.2	4139.8	2142.3	3087.9	2119.4	3411.2	A0A178V7V2	Dihydrolipoyl dehydrogenase OS=Arabidopsis thaliana OX=3702 GN=AXX17_At4g18960 PE=3 SV=1	67092	Carbamidomethylation	99.2	257.34	16	8	8	8	8	8	8	11	8	14	8	10	8	8	9	12	11	16	10	9	14	7	17	10	13
			6564.5	3546.5	3861.9			2689	5237	6201.4	P19037	18.1 kDa class I heat shock protein OS=Arabidopsis thaliana OX=3702 GN=HSP18.1 PE=1 SV=1	18135	Oxidation (M)	99.2	221.96	39	0	0	0	39	35	39	0	0	35	39	39	8	4	0	0	0	27	14	16	0	0	17	23	30
			6564.5	3546.5	3861.9			2689	5237	6201.4	A0A178UES7	(thale cress) hypothetical protein OS=Arabidopsis thaliana OX=3702 GN=AXX17_At5g59140 PE=3 SV=1	18135	Oxidation (M)	99.2	221.96	39	0	0	0	39	35	39	0	0	35	39	39	8	4	0	0	0	27	14	16	0	0	17	23	30
			6564.5	3546.5	3861.9			2689	5237	6201.4	A0A5S9YG28	SHSP domain-containing protein OS=Arabidopsis thaliana OX=3702 GN=C24_LOCUS26094 PE=3 SV=1	18120	Oxidation (M)	99.2	221.96	39	0	0	0	39	35	39	0	0	35	39	39	8	4	0	0	0	27	14	16	0	0	17	23	30
627.35	246.29	409.55	408.66	348.69		406.18	924.59	793.13	529.98	437.96	P46422	Glutathione S-transferase F2 OS=Arabidopsis thaliana OX=3702 GN=GSTF2 PE=1 SV=3	24129		99.1	229.46	34	19	10	10	23	19	4	19	34	30	19	19	6	5	11	5	7	9	7	6	11	28	19	12	12
627.35	246.29	409.55	408.66	348.69		406.18	924.59	793.13	529.98	437.96	A0A178V0A3	glutathione transferase OS=Arabidopsis thaliana OX=3702 GN=AXX17_At4g03160 PE=3 SV=1	24129		99.1	229.46	34	19	10	10	23	19	4	19	34	30	19	19	6	5	11	5	7	9	7	6	11	28	19	12	12
1963.5	1577.5	1428.5	2043.1	1794.9	1333.9	2083.6	940.65	2190.1	2417.5	2545.4	A0A1P8AUX7	Chaperonin 10 OS=Arabidopsis thaliana OX=3702 GN=CPN10 PE=1 SV=1	8857		99	188.25	59	59	51	50	50	51	43	50	50	59	50	59	5	5	18	8	8	13	10	11	12	7	12	14	13
1963.5	1577.5	1428.5	2043.1	1794.9	1333.9	2083.6	940.65	2190.1	2417.5	2545.4	A0A5S9UI40	(thale cress) hypothetical protein OS=Arabidopsis thaliana OX=3702 GN=AT9943_LOCUS1291 PE=3 SV=1	10812		99	188.25	49	49	43	42	42	43	36	42	42	49	42	49	5	5	18	8	8	13	10	11	12	7	12	14	13
1963.5	1577.5	1428.5	2043.1	1794.9	1333.9	2083.6	940.65	2190.1	2417.5	2545.4	A0A178WKN8	CPN10 OS=Arabidopsis thaliana OX=3702 GN=AXX17_At1g15670 PE=3 SV=1	10873		99	188.25	49	49	43	42	42	43	36	42	42	49	42	49	5	5	18	8	8	13	10	11	12	7	12	14	13
1963.5	1577.5	1428.5	2043.1	1794.9	1333.9	2083.6	940.65	2190.1	2417.5	2545.4	P34893	10 kDa chaperonin mitochondrial OS=Arabidopsis thaliana OX=3702 GN=CPN10 PE=1 SV=1	10812		99	188.25	49	49	43	42	42	43	36	42	42	49	42	49	5	5	18	8	8	13	10	11	12	7	12	14	13
1568.9	588.03	1578.1	2213	183.33	199.48	2186.2	3234.5	2854.3	2132.5	2459.4	P59259	Histone H4 OS=Arabidopsis thaliana OX=3702 GN=At5g59970 PE=1 SV=2	11409	Oxidation (M)	99	184.69	43	33	33	33	43	43	12	33	43	43	43	43	4	4	6	6	14	13	12	2	16	16	16	10	15
1568.9	588.03	1578.1	2213	183.33	199.48	2186.2	3234.5	2854.3	2132.5	2459.4	A0A384LKZ7	Histone H4 OS=Arabidopsis thaliana OX=3702 GN=AXX17_At1g07310 PE=3 SV=1	11409	Oxidation (M)	99	184.69	43	33	33	33	43	43	12	33	43	43	43	43	4	4	6	6	14	13	12	2	16	16	16	10	15
1568.9	588.03	1578.1	2213	183.33	199.48	2186.2	3234.5	2854.3	2132.5	2459.4	Q6NR90	Histone H4 OS=Arabidopsis thaliana OX=3702 GN=At1g07660 PE=2 SV=1	11409	Oxidation (M)	99	184.69	43	33	33	33	43	43	12	33	43	43	43	43	4	4	6	6	14	13	12	2	16	16	16	10	15
1058.8	311.26	511	1622.6	413.79	194.76	1453.1	1270.2	2269.2	1362.7	1211.7	F4JYE0	Biotin carboxylase OS=Arabidopsis thaliana OX=3702 GN=CAC2 PE=1 SV=1	60771	Carbamidomethylation; Oxidation (M)	99.1	233.36	16	7	7	9	12	7	5	9	13	16	14	12	7	7	9	6	10	17	6	3	13	12	22	11	17
1058.8	311.26	511	1622.6	413.79	194.76	1453.1	1270.2	2269.2	1362.7	1211.7	F4JYE1	Biotin carboxylase OS=Arabidopsis thaliana OX=3702 GN=CAC2 PE=1 SV=1	54164	Carbamidomethylation; Oxidation (M)	99.1	233.36	18	8	8	10	13	8	5	10	14	18	16	13	7	7	9	6	10	17	6	3	13	12	22	11	17
1058.8	311.26	511	1622.6	413.79	194.76	1453.1	1270.2	2269.2	1362.7	1211.7	A0A178UBV9	Biotin carboxylase OS=Arabidopsis thaliana OX=3702 GN=AXX17_At5g32460 PE=4 SV=1	57663	Carbamidomethylation; Oxidation (M)	99.1	233.36	17	8	8	9	12	8	5	9	14	17	15	12	7	7	9	6	10	17	6	3	13	12	22	11	17
1058.8	311.26	511	1622.6	413.79	194.76	1453.1	1270.2	2269.2	1362.7	1211.7	A0A178U9M2	Biotin carboxylase OS=Arabidopsis thaliana OX=3702 GN=AXX17_At5g32460 PE=4 SV=1	58387	Carbamidomethylation; Oxidation (M)	99.1	233.36	16	7	7	9	12	7	5	9	13	16	15	12	7	7	9	6	10	17	6	3	13	12	22	11	17
1058.8	311.26	511	1622.6	413.79	194.76	1453.1	1270.2	2269.2	1362.7	1211.7	O04983	Biotin carboxylase chloroplastic OS=Arabidopsis thaliana OX=3702 GN=CAC2 PE=1 SV=1	58387	Carbamidomethylation; Oxidation (M)	99.1	233.36	16	7	7	9	12	7	5	9	13	16	15	12	7	7	9	6	10	17	6	3	13	12	22	11	17
2785	1844.1	2920	2482.6	1608.8	1285.8	2110.9	2405.8	3174.7	2606.5	2851.9	A0A7G2EW72	(thale cress) hypothetical protein OS=Arabidopsis thaliana OX=3702 GN=AT9943_LOCUS13066 PE=3 SV=1	273455	Carbamidomethylation; Oxidation (M)	99.1	200.55	2	2	2	2	2	2	1	2	2	2	2	2	6	6	16	8	14	11	13	5	8	10	15	13	12
2785	1844.1	2920	2482.6	1608.8	1285.8	2110.9	2405.8	3174.7	2606.5	2851.9	A0A5S9XJ24	CBBY-like protein OS=Arabidopsis thaliana OX=3702 GN=C24_LOCUS15064 PE=4 SV=1	34217	Carbamidomethylation; Oxidation (M)	99.1	200.55	19	17	16	19	19	19	9	17	17	19	19	19	6	6	16	8	14	11	13	5	8	10	15	13	12
2785	1844.1	2920	2482.6	1608.8	1285.8	2110.9	2405.8	3174.7	2606.5	2851.9	Q94K71	CBBY-like protein OS=Arabidopsis thaliana OX=3702 GN=CBBY PE=1 SV=1	34245	Carbamidomethylation; Oxidation (M)	99.1	200.55	19	17	16	19	19	19	9	17	17	19	19	19	6	6	16	8	14	11	13	5	8	10	15	13	12
2785	1844.1	2920	2482.6	1608.8	1285.8	2110.9	2405.8	3174.7	2606.5	2851.9	A0A178VE98	CBBY-like protein OS=Arabidopsis thaliana OX=3702 GN=AXX17_At3g42530 PE=4 SV=1	34245	Carbamidomethylation; Oxidation (M)	99.1	200.55	19	17	16	19	19	19	9	17	17	19	19	19	6	6	16	8	14	11	13	5	8	10	15	13	12
											A0A7G2F5I8	Fructose-bisphosphate aldolase OS=Arabidopsis thaliana OX=3702 GN=AT9943_LOCUS18242 PE=3 SV=1	90444	Carbamidomethylation	99.1	193.19	5	4	4	3	4	5	4	4	4	4	4	5	5	0	9	9	13	11	10	15	10	11	12	13	12
1010.3	506.05	355.51	1198.7	329.01	0	1188.9	805.64	1409.3	1220.3	1362.6	B9DI55	AT3G09840 protein OS=Arabidopsis thaliana OX=3702 GN=At3g09840 PE=2 SV=1	89393	Carbamidomethylation; Oxidation (M)	99.2	238.41	12	7	5	8	7	10	2	9	6	11	9	10	9	9	11	5	11	16	9	2	18	14	12	14	13
1010.3	506.05	355.51	1198.7	329.01	0	1188.9	805.64	1409.3	1220.3	1362.6	A0A384KA82	CDC48A OS=Arabidopsis thaliana OX=3702 GN=AXX17_At3g09510 PE=4 SV=1	89393	Carbamidomethylation; Oxidation (M)	99.2	238.41	12	7	5	8	7	10	2	9	6	11	9	10	9	9	11	5	11	16	9	2	18	14	12	14	13
1010.3	506.05	355.51	1198.7	329.01	0	1188.9	805.64	1409.3	1220.3	1362.6	P54609	Cell division control protein 48 homolog A OS=Arabidopsis thaliana OX=3702 GN=CDC48A PE=1 SV=1	89393	Carbamidomethylation; Oxidation (M)	99.2	238.41	12	7	5	8	7	10	2	9	6	11	9	10	9	9	11	5	11	16	9	2	18	14	12	14	13
1010.3	506.05	355.51	1198.7	329.01	0	1188.9	805.64	1409.3	1220.3	1362.6	A0A7G2EJB3	(thale cress) hypothetical protein OS=Arabidopsis thaliana OX=3702 GN=AT9943_LOCUS10559 PE=4 SV=1	133602	Carbamidomethylation; Oxidation (M)	99.2	238.41	8	5	3	5	5	6	1	6	4	7	6	7	9	9	11	5	11	16	9	2	18	14	12	14	13
1010.3	506.05	355.51	1198.7	329.01	0	1188.9	805.64	1409.3	1220.3	1362.6	A0A654FXU5	Cell division cycle protein 48 homolog OS=Arabidopsis thaliana OX=3702 GN=AN1_LOCUS21127 PE=4 SV=1	89958	Carbamidomethylation; Oxidation (M)	99.2	238.41	12	7	5	8	7	10	2	9	6	11	9	10	9	9	11	5	11	16	9	2	18	14	12	14	13
1010.3	506.05	355.51	1198.7	329.01	0	1188.9	805.64	1409.3	1220.3	1362.6	A0A178URT8	AtCDC48C OS=Arabidopsis thaliana OX=3702 GN=AXX17_At5g02560 PE=4 SV=1	89944	Carbamidomethylation; Oxidation (M)	99.2	238.41	12	7	5	8	7	10	2	9	6	11	9	10	9	9	11	5	11	16	9	2	18	14	12	14	13
1010.3	506.05	355.51	1198.7	329.01	0	1188.9	805.64	1409.3	1220.3	1362.6	Q9LZF6	Cell division control protein 48 homolog E OS=Arabidopsis thaliana OX=3702 GN=CDC48E PE=2 SV=2	89958	Carbamidomethylation; Oxidation (M)	99.2	238.41	12	7	5	8	7	10	2	9	6	11	9	10	9	9	11	5	11	16	9	2	18	14	12	14	13
1299.8	1507.3	1843.2	1261	1499.5	686.4	2827.2	1424.5	956.95	1770.5	2191.6	Q93VG5	40S ribosomal protein S8-1 OS=Arabidopsis thaliana OX=3702 GN=RPS8A PE=1 SV=1	24994	Oxidation (M)	99.1	201.25	26	19	16	23	19	23	23	23	23	22	23	23	5	5	10	10	12	10	12	9	14	14	14	11	9
1299.8	1507.3	1843.2	1261	1499.5	686.4	2827.2	1424.5	956.95	1770.5	2191.6	A0A178UCD3	40S ribosomal protein S8 OS=Arabidopsis thaliana OX=3702 GN=AXX17_At5g20270 PE=3 SV=1	24994	Oxidation (M)	99.1	201.25	26	19	16	23	19	23	23	23	23	22	23	23	5	5	10	10	12	10	12	9	14	14	14	11	9
1433.9	2099.5	1038.9	1255.3	1820.2	1305.8	910.19	1388.4	1423.6	1997.4	1014.2	A0A178U8H7	BTR1S OS=Arabidopsis thaliana OX=3702 GN=AXX17_At5g03870 PE=4 SV=1	33835	Carbamidomethylation; Oxidation (M)	99.2	214.46	33	13	21	21	13	21	13	18	21	29	21	18	9	9	11	14	13	13	12	7	11	10	15	10	9
1433.9	2099.5	1038.9	1255.3	1820.2	1305.8	910.19	1388.4	1423.6	1997.4	1014.2	A0A178U9H2	BTR1S OS=Arabidopsis thaliana OX=3702 GN=AXX17_At5g03870 PE=4 SV=1	36032	Carbamidomethylation; Oxidation (M)	99.2	214.46	31	12	20	20	13	20	12	17	20	28	20	16	9	9	11	14	13	13	12	7	11	10	15	10	9
1433.9	2099.5	1038.9	1255.3	1820.2	1305.8	910.19	1388.4	1423.6	1997.4	1014.2	Q9LZ82	Protein BTR1 OS=Arabidopsis thaliana OX=3702 GN=BTR1 PE=1 SV=1	33821	Carbamidomethylation; Oxidation (M)	99.2	214.46	33	13	21	21	13	21	13	18	21	29	21	18	9	9	11	14	13	13	12	7	11	10	15	10	9
1433.9	2099.5	1038.9	1255.3	1820.2	1305.8	910.19	1388.4	1423.6	1997.4	1014.2	A0A7G2F758	(thale cress) hypothetical protein OS=Arabidopsis thaliana OX=3702 GN=AT9943_LOCUS18311 PE=4 SV=1	33821	Carbamidomethylation; Oxidation (M)	99.2	214.46	33	13	21	21	13	21	13	18	21	29	21	18	9	9	11	14	13	13	12	7	11	10	15	10	9
1433.9	2099.5	1038.9	1255.3	1820.2	1305.8	910.19	1388.4	1423.6	1997.4	1014.2	A0A5S9Y1L5	(thale cress) hypothetical protein OS=Arabidopsis thaliana OX=3702 GN=At5g04430 PE=4 SV=1	36018	Carbamidomethylation; Oxidation (M)	99.2	214.46	31	12	20	20	13	20	12	17	20	28	20	16	9	9	11	14	13	13	12	7	11	10	15	10	9
											A0A178VI56	(thale cress) hypothetical protein OS=Arabidopsis thaliana OX=3702 GN=AXX17_At3g20010 PE=4 SV=1	23102	Oxidation (M)	98.8	174.57	21	21	20	21	16	21	16	21	16	21	21	21	5	0	15	10	9	14	10	7	13	9	15	13	10
											Q9LS94	Ras-related protein RABG3f OS=Arabidopsis thaliana OX=3702 GN=RABG3F PE=1 SV=1	23102	Oxidation (M)	98.8	174.57	21	21	20	21	16	21	16	21	16	21	21	21	5	0	15	10	9	14	10	7	13	9	15	13	10
			0			0	0	0	0	33.54	B3H4B6	40S ribosomal protein S25 OS=Arabidopsis thaliana OX=3702 GN=At4g39200 PE=1 SV=1	11925	Oxidation (M)	99.1	188.73	50	32	29	38	35	32	32	50	35	50	44	44	5	1	14	9	11	11	8	8	11	8	15	16	14
			0			0	0	0	0	33.54	Q9T029	40S ribosomal protein S25-4 OS=Arabidopsis thaliana OX=3702 GN=RPS25E PE=3 SV=1	12053	Oxidation (M)	99.1	188.73	50	31	29	38	34	31	31	50	34	50	44	44	5	1	14	9	11	11	8	8	11	8	15	16	14
			0			0	0	0	0	33.54	A0A178UWL1	40S ribosomal protein S25 OS=Arabidopsis thaliana OX=3702 GN=AXX17_At4g44590 PE=3 SV=1	12053	Oxidation (M)	99.1	188.73	50	31	29	38	34	31	31	50	34	50	44	44	5	1	14	9	11	11	8	8	11	8	15	16	14
			0			0	0	0	0	33.54	A0A178UU98	40S ribosomal protein S25 OS=Arabidopsis thaliana OX=3702 GN=AXX17_At4g44590 PE=3 SV=1	15164	Oxidation (M)	99	188.73	40	25	23	30	27	25	25	40	27	40	35	35	5	1	14	9	11	11	8	8	11	8	15	16	14
3136.9	3825.1	6038.9	1846.7	2440.3	742.61	7160.8	2550.1	2409.7	1370.1	2089.4	Q39061	RNA-binding protein CP33 chloroplastic OS=Arabidopsis thaliana OX=3702 GN=CP33 PE=2 SV=1	35744	Oxidation (M)	99.1	215.97	19	11	13	15	13	15	13	19	11	13	11	13	6	6	14	17	18	9	9	7	14	11	7	9	9
3136.9	3825.1	6038.9	1846.7	2440.3	742.61	7160.8	2550.1	2409.7	1370.1	2089.4	A0A178VGE7	PDE322 OS=Arabidopsis thaliana OX=3702 GN=AXX17_At3g46800 PE=4 SV=1	35744	Oxidation (M)	99.1	215.97	19	11	13	15	13	15	13	19	11	13	11	13	6	6	14	17	18	9	9	7	14	11	7	9	9
3136.9	3825.1	6038.9	1846.7	2440.3	742.61	7160.8	2550.1	2409.7	1370.1	2089.4	A0A5S9XK34	33 kDa ribonucleoprotein chloroplastic OS=Arabidopsis thaliana OX=3702 GN=C24_LOCUS15486 PE=4 SV=1	35758	Oxidation (M)	99.1	215.97	19	11	13	15	13	15	13	19	11	13	11	13	6	6	14	17	18	9	9	7	14	11	7	9	9
3136.9	3825.1	6038.9	1846.7	2440.3	742.61	7160.8	2550.1	2409.7	1370.1	2089.4	A0A654FGF4	33 kDa ribonucleoprotein chloroplastic OS=Arabidopsis thaliana OX=3702 GN=AN1_LOCUS15604 PE=4 SV=1	35757	Oxidation (M)	99.1	215.97	19	11	13	15	13	15	13	19	11	13	11	13	6	6	14	17	18	9	9	7	14	11	7	9	9
											A0A178VSB4	HSP98.7 OS=Arabidopsis thaliana OX=3702 GN=AXX17_At2g20870 PE=3 SV=1	108502		99.1	208.71	4	2	2	2	4	4	3	2	2	4	4	4	4	0	9	5	6	13	17	12	7	7	14	16	18
											A0A654EXJ3	Clp R domain-containing protein OS=Arabidopsis thaliana OX=3702 GN=AN1_LOCUS8896 PE=3 SV=1	108552		99.1	208.71	4	2	2	2	4	4	3	2	2	4	4	4	4	0	9	5	6	13	17	12	7	7	14	16	18
											A0A7G2ED05	(thale cress) hypothetical protein OS=Arabidopsis thaliana OX=3702 GN=AT9943_LOCUS7629 PE=3 SV=1	110045		99.1	208.71	4	2	2	2	4	4	3	2	2	4	4	4	4	0	9	5	6	13	17	12	7	7	14	16	18
[truncated: 6,798 more rows]

## Sheet: Supplementary Data 1-2
Col-0_RC_1	Col-0_RC_2	ATG8a(S)_RC_1	ATG8a(S)_RC_2	ATG8a(S)_RC_3	Accession	Description	Avg. Mass	PTM	Score (%)	-10lgP	Coverage (%)	Coverage (%) Col-0_RC_1	Coverage (%) Col-0_RC_2	Coverage (%) ATG8a(S)_RC_1	Coverage (%) ATG8a(S)_RC_2	Coverage (%) ATG8a(S)_RC_3	#Peptides	#Unique	#Spec Col-0_RC_1	#Spec Col-0_RC_2	#Spec ATG8a(S)_RC_1	#Spec ATG8a(S)_RC_2	#Spec ATG8a(S)_RC_3
[truncated: 4,596 more rows]
